# Supplementary material
Source: PubMed Central journal article supplement (PMC4792696)

## Supporting Information: Experimental Part

### Determination of the Influence of Side Chain Conformation on Glycosylation Selectivity Using Conformationally Restricted Donors

Suresh Dharuman and David Crich\*

*Department of Chemistry, Wayne State University, 5101 Cass Avenue, Detroit, MI 48202*

| Compounds                                                                                                                                          | Expt | Spectra    |
|----------------------------------------------------------------------------------------------------------------------------------------------------|------|------------|
| General Experimental                                                                                                                               | S-6  | ---        |
| Phenyl 4,6- <i>O-p</i> -methoxybenzylidene-2,3-di- <i>O</i> -methyl-1-thio- $\alpha$ -D-mannopyranoside ( <b>4</b> )                               | S-6  | S-29, S-30 |
| Phenyl 4- <i>O</i> -benzyl-2,3-di- <i>O</i> -methyl-1-thio- $\alpha$ -D-mannopyranoside ( <b>5</b> )                                               | S-6  | S-31, S-32 |
| Phenyl 4- <i>O-p</i> -methoxybenzyl-2,3-di- <i>O</i> -methyl-1-thio- $\alpha$ -D-mannopyranoside ( <b>6</b> )                                      | S-7  | S-33, S-34 |
| (6 <i>R</i> ) Phenyl 6- <i>C</i> -Allyl-4- <i>O</i> -benzyl-2,3-di- <i>O</i> -methyl-1-thio- $\alpha$ -D-mannopyranoside ( <b>7</b> )              | S-8  | S-35, S-36 |
| (6 <i>R</i> ) Phenyl 6- <i>C</i> -Allyl-4- <i>O-p</i> -methoxybenzyl-2,3-di- <i>O</i> -methyl-1-thio- $\alpha$ -D-mannopyranoside ( <b>8</b> )     | S-8  | S-37, S-38 |
| (6 <i>S</i> ) Phenyl 6- <i>C</i> -Allyl-4- <i>O</i> -benzyl-2,3-di- <i>O</i> -methyl-1-thio- $\alpha$ -D-mannopyranoside ( <b>9</b> )              | S-8  | S-39, S-40 |
| (6 <i>S</i> ) Phenyl 6- <i>C</i> -Allyl-4- <i>O-p</i> -methoxybenzyl-2,3-di- <i>O</i> -methyl-1-thio- $\alpha$ -D-mannopyranoside ( <b>10</b> )    | S-9  | S-41, S-42 |
| (6 <i>R</i> ) Phenyl 6- <i>C</i> -Allyl-4- <i>O</i> -benzyl-2,3,6-tri- <i>O</i> -methyl-1-thio- $\alpha$ -D-mannopyranoside ( <b>11</b> )          | S-9  | S-43, S-44 |
| (6 <i>R</i> ) Phenyl 6- <i>C</i> -Allyl-4- <i>O-p</i> -methoxybenzyl-2,3,6-tri- <i>O</i> -methyl-1-thio- $\alpha$ -D-mannopyranoside ( <b>12</b> ) | S-10 | S-45, S-46 |
| (6 <i>S</i> ) Phenyl 6- <i>C</i> -Allyl-4- <i>O</i> -benzyl-2,3,6-tri- <i>O</i> -methyl-1-thio- $\alpha$ -D-mannopyranoside ( <b>13</b> )          | S-10 | S-47, S-48 |

|                                                                                                                                                                     |      |            |
|---------------------------------------------------------------------------------------------------------------------------------------------------------------------|------|------------|
| (6 <i>S</i> ) Phenyl 6- <i>C</i> -Allyl-4- <i>O</i> - <i>p</i> -methoxybenzyl-2,3,6-tri- <i>O</i> -methyl-1-thio- $\alpha$ -D- <i>mannopyranoside</i> ( <b>14</b> ) | S-11 | S-49, S-50 |
| Phenyl 4- <i>O</i> -benzyl-7-deoxy-2,3,6-tri- <i>O</i> -methyl-D- <i>glycero</i> - $\alpha$ -D-thio- <i>mannooctopyranoside</i> ( <b>15</b> )                       | S-11 | S-51, S-52 |
| Phenyl 4- <i>O</i> - <i>p</i> -methoxybenzyl-7-deoxy-2,3,6-tri- <i>O</i> -methyl-D- <i>glycero</i> - $\alpha$ -D-thio- <i>mannooctopyranoside</i> ( <b>16</b> )     | S-11 | S-53, S-54 |
| Phenyl 4- <i>O</i> -benzyl-7-deoxy-2,3,6-tri- <i>O</i> -methyl-L- <i>glycero</i> - $\alpha$ -D-thio- <i>mannooctopyranoside</i> ( <b>17</b> )                       | S-12 | S-55, S-56 |
| Phenyl 4- <i>O</i> - <i>p</i> -methoxybenzyl-7-deoxy-2,3,6-tri- <i>O</i> -methyl-L- <i>glycero</i> - $\alpha$ -D-thio- <i>mannooctopyranoside</i> ( <b>18</b> )     | S-12 | S-57, S-58 |
| Phenyl 7-deoxy-2,3,6-tri- <i>O</i> -methyl-D- <i>glycero</i> - $\alpha$ -D-thio- <i>mannooctofuranoside</i> ( <b>19</b> )                                           | S-13 | S-59, S-60 |
| Phenyl 5,8-anhydro-7-deoxy-2,3,6-tri- <i>O</i> -methyl-D- <i>glycero</i> - $\alpha$ -D-thio- <i>mannooctofuranoside</i> ( <b>20</b> )                               | S-13 | S-61, S-62 |
| Phenyl 7-deoxy-2,3,6-tri- <i>O</i> -methyl-L- <i>glycero</i> - $\alpha$ -D-thio- <i>mannooctofuranoside</i> ( <b>21</b> )                                           | S-14 | S-63, S-64 |
| Phenyl 5,8-anhydro-7-deoxy-2,3,6-tri- <i>O</i> -methyl-L- <i>glycero</i> - $\alpha$ -D-thio- <i>mannooctofuranoside</i> ( <b>22</b> )                               | S-14 | S-65, S-66 |
| Phenyl 7-deoxy-2,3,6-tri- <i>O</i> -methyl-D- <i>glycero</i> - $\alpha$ -D-thio- <i>mannooctopyranoside</i> ( <b>23</b> )                                           | S-15 | S-67, S-68 |
| Phenyl 4,8-anhydro-7-deoxy-2,3,6-tri- <i>O</i> -methyl-D- <i>glycero</i> - $\alpha$ -D-thio- <i>mannooctopyranoside</i> ( <b>24</b> )                               | ---  | S-69, S-70 |
| Phenyl 7-deoxy-2,3,6-tri- <i>O</i> -methyl-L- <i>glycero</i> - $\alpha$ -D-thio- <i>mannooctopyranoside</i> ( <b>25</b> )                                           | S-15 | S-71, S-72 |
| Phenyl 4,8-anhydro-7-deoxy-2,3,6-tri- <i>O</i> -methyl-L- <i>glycero</i> - $\alpha$ -D-thio- <i>mannooctopyranoside</i> ( <b>26</b> )                               | ---  | S-73, S-74 |
| Phenyl 7-deoxy-2,3-di- <i>O</i> -methyl-4- <i>O</i> -( <i>p</i> -methoxybenzyl)-D- <i>glycero</i> - $\alpha$ -D-thio- <i>mannoheptopyranoside</i> ( <b>27</b> )     | S-15 | S-75, S-76 |
| Phenyl 7-deoxy-2,3-di- <i>O</i> -methyl-4- <i>O</i> -( <i>p</i> -methoxybenzyl)-L- <i>glycero</i> -                                                                 | S-16 | S-77, S-78 |

|                                                                                                                                                                                                                                              |      |              |
|----------------------------------------------------------------------------------------------------------------------------------------------------------------------------------------------------------------------------------------------|------|--------------|
| $\alpha$ -D-thio- <i>manno</i> heptopyranoside ( <b>28</b> )                                                                                                                                                                                 |      |              |
| Phenyl 2,3-di- <i>O</i> -methyl-4- <i>O</i> -( <i>p</i> -methoxybenzyl)-6- <i>O</i> -( <i>p</i> -nitrobenzoyl)-D- <i>glycero</i> - $\alpha$ -D-thio- <i>manno</i> heptopyranoside ( <b>29</b> )                                              | S-16 | S-79, S-80   |
| (6 <i>S</i> ) Phenyl 2,3-di- <i>O</i> -methyl-4,6- <i>O</i> -( <i>p</i> -methoxybenzylidene)-D- <i>glycero</i> - $\alpha$ -D-thio- <i>manno</i> heptopyranoside ( <b>30</b> )                                                                | S-17 | S-81, S-82   |
| Phenyl 2,3-di- <i>O</i> -methyl-4,6- <i>O</i> -( <i>p</i> -methoxybenzylidene)-L- <i>glycero</i> - $\alpha$ -D-thio- <i>manno</i> heptopyranoside ( <b>31</b> )                                                                              | S-18 | S-83, S-84   |
| Phenyl 7-deoxy-2,3-di- <i>O</i> -methyl-D- <i>glycero</i> - $\alpha$ -D-thio- <i>manno</i> heptopyranoside ( <b>32</b> )                                                                                                                     | S-17 | S-85, S-86   |
| Phenyl 7-deoxy-2,3-di- <i>O</i> -methyl-L- <i>glycero</i> - $\alpha$ -D-thio- <i>manno</i> heptopyranoside ( <b>33</b> )                                                                                                                     | S-18 | S-87, S-88   |
| Phenyl 4,6- <i>O</i> -benzylidene-7-deoxy-2,3-di- <i>O</i> -methyl-D- <i>glycero</i> - $\alpha$ -D-thio- <i>manno</i> heptopyranoside ( <b>34</b> )                                                                                          | ---  | S-89, S-90   |
| Phenyl 4,6- <i>O</i> -benzylidene-7-deoxy-2,3-di- <i>O</i> -methyl-L- <i>glycero</i> - $\alpha$ -D-thio- <i>manno</i> heptopyranoside ( <b>35</b> )                                                                                          | ---  | S-91, S-92   |
| Methyl 4,8-anhydro-7-deoxy-2,3,6-tri- <i>O</i> -methyl-D- <i>glycero</i> - $\beta$ -D- <i>mannoo</i> ctopyranosyl-(1 $\rightarrow$ 6)-2',3',4'-tri- <i>O</i> -benzyl- $\alpha$ -D- <i>gluco</i> pyranoside ( <b>39<math>\beta</math></b> )   | S-19 | S-93, S-94   |
| Methyl 4,8-anhydro-7-deoxy-2,3,6-tri- <i>O</i> -methyl-D- <i>glycero</i> - $\alpha$ -D- <i>mannoo</i> ctopyranosyl-(1 $\rightarrow$ 6)-2',3',4'-tri- <i>O</i> -benzyl- $\alpha$ -D- <i>gluco</i> pyranoside ( <b>39<math>\alpha</math></b> ) | S-19 | S-95, S-96   |
| Methyl 4,8-anhydro-7-deoxy-2,3,6-tri- <i>O</i> -methyl-D- <i>glycero</i> - $\beta$ -D- <i>mannoo</i> ctopyranosyl-(1 $\rightarrow$ 4)-2',3',6'-tri- <i>O</i> -benzyl- $\alpha$ -D- <i>gluco</i> pyranoside ( <b>40<math>\beta</math></b> )   | S-20 | S-97, S-98   |
| Methyl 4,8-anhydro-7-deoxy-2,3,6-tri- <i>O</i> -methyl-D- <i>glycero</i> - $\alpha$ -D- <i>mannoo</i> ctopyranosyl-(1 $\rightarrow$ 4)-2',3',6'-tri- <i>O</i> -benzyl- $\alpha$ -D- <i>gluco</i> pyranoside ( <b>40<math>\alpha</math></b> ) | S-20 | S-99, S-100  |
| (1-Adamantanyl) 4,8-anhydro-7-deoxy-2,3,6-tri- <i>O</i> -methyl-D- <i>glycero</i> - $\beta$ -D- <i>mannoo</i> ctopyranoside ( <b>41<math>\beta</math></b> )                                                                                  | S-21 | S-101, S-102 |

|                                                                                                                                                                                                                                                          |      |              |
|----------------------------------------------------------------------------------------------------------------------------------------------------------------------------------------------------------------------------------------------------------|------|--------------|
| (1-Adamantanyl) 4,8-anhydro-7-deoxy-2,3,6-tri- <i>O</i> -methyl-D- <i>glycero</i> - $\alpha$ -D- <i>mannooctopyranoside</i> ( <b>41<math>\alpha</math></b> )                                                                                             | S-21 | S-103, S-104 |
| Methyl 4,8-anhydro-7-deoxy-2,3,6-tri- <i>O</i> -methyl-L- <i>glycero</i> - $\beta$ -D- <i>mannooctopyranosyl</i> -(1 $\rightarrow$ 6)-2',3',4'-tri- <i>O</i> -benzyl- $\alpha$ -D- <i>glucopyranoside</i> ( <b>42<math>\beta</math></b> )                | S-21 | S-105, S-106 |
| Methyl 4,8-anhydro-7-deoxy-2,3,6-tri- <i>O</i> -methyl-L- <i>glycero</i> - $\alpha$ -D- <i>mannooctopyranosyl</i> -(1 $\rightarrow$ 6)-2',3',4'-tri- <i>O</i> -benzyl- $\alpha$ -D- <i>glucopyranoside</i> ( <b>42<math>\alpha</math></b> )              | S-22 | S-107, S-108 |
| Methyl 4,8-anhydro-7-deoxy-2,3,6-tri- <i>O</i> -methyl-L- <i>glycero</i> - $\beta$ -D- <i>mannooctopyranosyl</i> -(1 $\rightarrow$ 4)-2',3',6'-tri- <i>O</i> -benzyl- $\alpha$ -D- <i>glucopyranoside</i> ( <b>43<math>\beta</math></b> )                | S-22 | S-109, S-110 |
| Methyl 4,8-anhydro-7-deoxy-2,3,6-tri- <i>O</i> -methyl-L- <i>glycero</i> - $\alpha$ -D- <i>mannooctopyranosyl</i> -(1 $\rightarrow$ 4)-2',3',6'-tri- <i>O</i> -benzyl- $\alpha$ -D- <i>glucopyranoside</i> ( <b>43<math>\alpha</math></b> )              | S-23 | S-111, S-112 |
| (1-Adamantanyl) 4,8-anhydro-7-deoxy-2,3,6-tri- <i>O</i> -methyl-L- <i>glycero</i> - $\beta$ -D- <i>mannooctopyranoside</i> ( <b>44<math>\beta</math></b> )                                                                                               | S-23 | S-113, S-114 |
| (1-Adamantanyl) 4,8-anhydro-7-deoxy-2,3,6-tri- <i>O</i> -methyl-L- <i>glycero</i> - $\alpha$ -D- <i>mannooctopyranoside</i> ( <b>44<math>\alpha</math></b> )                                                                                             | S-23 | S-115, S-116 |
| Methyl 4,6- <i>O</i> -benzylidene-7-deoxy-2,3-di- <i>O</i> -methyl-L- <i>glycero</i> - $\beta$ -D- <i>mannohetpopyranosyl</i> -(1 $\rightarrow$ 6)-2',3',4'-tri- <i>O</i> -benzyl- $\alpha$ -D- <i>glucopyranoside</i> ( <b>45<math>\beta</math></b> )   | S-24 | S-117, S-118 |
| Methyl 4,6- <i>O</i> -benzylidene-7-deoxy-2,3-di- <i>O</i> -methyl-L- <i>glycero</i> - $\alpha$ -D- <i>mannohetpopyranosyl</i> -(1 $\rightarrow$ 6)-2',3',4'-tri- <i>O</i> -benzyl- $\alpha$ -D- <i>glucopyranoside</i> ( <b>45<math>\alpha</math></b> ) | S-24 | S-119, S-120 |
| Methyl 4,6- <i>O</i> -benzylidene-7-deoxy-2,3-di- <i>O</i> -methyl-L- <i>glycero</i> - $\beta$ -D- <i>mannohetpopyranosyl</i> -(1 $\rightarrow$ 4)-2',3',6'-tri- <i>O</i> -benzyl- $\alpha$ -D- <i>glucopyranoside</i> ( <b>46<math>\beta</math></b> )   | S-25 | S-121, S-122 |

|                                                                                                                                                                                                                                                 |      |              |
|-------------------------------------------------------------------------------------------------------------------------------------------------------------------------------------------------------------------------------------------------|------|--------------|
| (1-Adamantanyl) 4,6- <i>O</i> -benzylidene-7-deoxy-2,3-di- <i>O</i> -methyl-L- <i>glycero</i> - $\beta$ -D-mannohetpopyranoside ( <b>47<math>\beta</math></b> )                                                                                 | S-26 | S-123, S-124 |
| (1-Adamantanyl) 4,6- <i>O</i> -benzylidene-7-deoxy-2,3-di- <i>O</i> -methyl-L- <i>glycero</i> - $\alpha$ -D-mannohetpopyranoside ( <b>47<math>\alpha</math></b> )                                                                               | S-26 | S-125, S-126 |
| Methyl 4,6- <i>O</i> -benzylidene-7-deoxy-2,3-di- <i>O</i> -methyl-D- <i>glycero</i> - $\beta$ -D-mannohetpopyranosyl-(1 $\rightarrow$ 6)-2',3',4'-tri- <i>O</i> -benzyl- $\alpha$ -D- <i>glucopyranoside</i> ( <b>48<math>\beta</math></b> )   | S-26 | S-127, S-128 |
| Methyl 4,6- <i>O</i> -benzylidene-7-deoxy-2,3-di- <i>O</i> -methyl-D- <i>glycero</i> - $\alpha$ -D-mannohetpopyranosyl-(1 $\rightarrow$ 6)-2',3',4'-tri- <i>O</i> -benzyl- $\alpha$ -D- <i>glucopyranoside</i> ( <b>48<math>\alpha</math></b> ) | S-27 | S-129, S-130 |
| Methyl 4,6- <i>O</i> -benzylidene-7-deoxy-2,3-di- <i>O</i> -methyl-D- <i>glycero</i> - $\beta$ -D-mannohetpopyranosyl-(1 $\rightarrow$ 4)-2',3',6'-tri- <i>O</i> -benzyl- $\alpha$ -D- <i>glucopyranoside</i> ( <b>49<math>\beta</math></b> )   | S-27 | S-131, S-132 |
| (1-Adamantanyl) 4,6- <i>O</i> -benzylidene-7-deoxy-2,3-di- <i>O</i> -methyl-D- <i>glycero</i> - $\beta$ -D-mannohetpopyranoside ( <b>50<math>\beta</math></b> )                                                                                 | S-28 | S-133, S-134 |
| (1-Adamantanyl) 4,6- <i>O</i> -benzylidene-7-deoxy-2,3-di- <i>O</i> -methyl-D- <i>glycero</i> - $\alpha$ -D-mannohetpopyranoside ( <b>50<math>\alpha</math></b> )                                                                               | S-28 | S-135, S-136 |

### **General Experimental Section:**

<sup>1</sup>H NMR spectra were recorded in CDCl<sub>3</sub> solution unless otherwise stated at 400, 500, or 600 MHz. <sup>13</sup>C NMR spectra were recorded in CDCl<sub>3</sub> solution unless otherwise stated at 100, 125, or 150 MHz. Mass spectra were recorded in the +ve ion mode using electrospray ionization (ESI-TOF). Specific rotations were recorded in dichloromethane solution at room temperature unless otherwise stated. Molecular sieves used in glycosylation reactions were of the commercial. All reaction solvents were dried by standing over molecular sieves.

#### **Phenyl 4,6-*O*-*p*-methoxybenzylidene-2,3-di-*O*-methyl-1-thio- $\alpha$ -D-mannopyranoside (4)**

To a stirred solution of diol **2** (0.5 g, 1.28 mmol) and NaH (60%, 0.15 g, 3.84 mmol) in dry DMF (5 ml) was added MeI (0.24 ml, 3.84 mmol) dropwise at about 0 °C (ice-water bath). The reaction mixture was stirred at 0 °C for 0.5 h before TLC (20 % ethyl acetate in hexane) showed reaction completion. The reaction mixture was quenched with water (5 ml), extracted with EtOAc (3 × 20 ml), and washed with brine solution (1 × 15 ml). The combined extracts were dried over Na<sub>2</sub>SO<sub>4</sub> and concentrated under high vacuum. Column chromatography on silica gel (eluent: 10% ethyl acetate in hexane) afforded **4** (0.41 g, 76%) as a colorless oil.  $R_f$  = 0.70 (hexane/EtOAc 4:1);  $[\alpha]_D^{22} = +196.4$  ( $c$  0.85, CH<sub>2</sub>Cl<sub>2</sub>); <sup>1</sup>H NMR (400 MHz, CDCl<sub>3</sub>)  $\delta$  7.50 – 7.40 (m, 4H, Ar-*H*), 7.35 – 7.26 (m, 3H, Ar-*H*), 6.90 – 6.88 (m, 2H, Ar-*H*), 5.63 (d,  $J$  = 1.1 Hz, 1H, H-1), 5.56 (s, 1H, Benzylidene-*H*), 4.31 (td,  $J$  = 9.8, 4.8 Hz, 1H, H-5), 4.20 (dd,  $J$  = 10.3, 4.8 Hz, 1H, H-6), 4.13 (t,  $J$  = 9.7 Hz, 1H, H-4), 3.92 (dd,  $J$  = 3.2, 1.4 Hz, 1H, H-2), 3.89 – 3.81 (m, 1H, H-6'), 3.80 (s, 3H, OCH<sub>3</sub>), 3.72 (dd,  $J$  = 9.9, 3.2 Hz, 1H, H-3), 3.58 (s, 3H, OCH<sub>3</sub>), 3.53 (s, 3H, OCH<sub>3</sub>); <sup>13</sup>C NMR (100 MHz, CDCl<sub>3</sub>)  $\delta$  160.0, 133.9, 131.3, 129.9, 129.1, 127.6, 127.4, 113.5, 101.1, 85.9, 80.3, 79.0, 76.8, 68.4, 65.0, 59.0, 58.9, 55.2; HRMS (ESI)  $m/z$  calcd for C<sub>25</sub>H<sub>26</sub>O<sub>6</sub>Na [M+Na]<sup>+</sup>, 441.1348; found, 441.1350.

#### **Phenyl 4-*O*-benzyl-2, 3-di-*O*-methyl-1-thio- $\alpha$ -D-mannopyranoside (5)**

To a solution of thioglycoside **3** (1.0 g, 2.57 mmol) and BH<sub>3</sub>.THF (5.1 ml, 5.15 mmol) in CH<sub>2</sub>Cl<sub>2</sub> (20 ml) was added Yb(OTf)<sub>3</sub> (0.16 g, 0.25 mmol) at room temperature. The reaction mixture was stirred for 2 h at room temperature before TLC (50% ethyl acetate in hexane) showed reaction completion. The reaction mixture was quenched with Et<sub>3</sub>N (0.36 ml), MeOH (5 ml), and solvents were concentrated under high vacuum. The crude residue was purified through silica gel column chromatography (eluent: 50% ethyl acetate in hexane) to give **5** (0.74 g, 74%) as a colorless oil.

$R_f = 0.60$  (hexane/EtOAc 1:1);  $[\alpha]_D^{22} = +174.0$  ( $c$  1.15,  $\text{CH}_2\text{Cl}_2$ );  $^1\text{H NMR}$  (600 MHz,  $\text{CDCl}_3$ )  $\delta$  7.48 – 7.47 (m, 2H, Ar-*H*), 7.37 – 7.26 (m, 8H, Ar-*H*),  $\delta$  5.63 (d,  $J = 1.0$  Hz, 1H, H-1), 4.91 (d,  $J = 11.0$  Hz, 1H, - $\text{OCH}_a\text{H}_b\text{Ph}$ ), 4.64 (d,  $J = 11.0$  Hz, 1H,  $\text{OCH}_a\text{H}_b\text{Ph}$ ), 4.13 (ddd,  $J = 9.5, 4.2, 2.9$  Hz, 1H, H-5), 3.89 – 3.87 (m, 1H, H-2), 3.86 (t,  $J = 9.6$  Hz, 1H, H-4), 3.80 (dd,  $J = 11.7, 2.5$  Hz, 1H, H-6), 3.77 (dd,  $J = 11.7, 4.4$  Hz, 1H, H-6'), 3.62 (dd,  $J = 9.1, 3.3$  Hz, 1H, H-3), 3.54 (s, 3H,  $\text{OCH}_3$ ), 3.49 (s, 3H,  $\text{OCH}_3$ ), 1.89 (s, 1H, OH);  $^{13}\text{C NMR}$  (150 MHz,  $\text{CDCl}_3$ )  $\delta$  138.3, 134.0, 131.6, 129.1, 128.4, 128.0, 127.7, 127.6, 84.9, 81.9, 78.7, 75.2, 74.7, 72.9, 62.1, 58.3, 57.8; HRMS (ESI)  $m/z$  calcd for  $\text{C}_{21}\text{H}_{26}\text{O}_5\text{SNa}$   $[\text{M}+\text{Na}]^+$ , 413.1399; found, 413.1392.

**Phenyl 4-*O*-*p*-methoxybenzyl-2,3-di-*O*-methyl-1-thio- $\alpha$ -D-mannopyranoside (6)**

Compound **6** was prepared analogously as **5** from the mannopyranoside **4**, as a colorless oil (68%, 2.7 g).  $R_f = 0.30$  (hexane/EtOAc 4:6);  $[\alpha]_D^{22} = +150.0$  ( $c$  0.70,  $\text{CH}_2\text{Cl}_2$ );  $^1\text{H NMR}$  (400 MHz,  $\text{CDCl}_3$ )  $\delta$  7.53 – 7.40 (m, 2H, Ar-*H*), 7.35 – 7.20 (m, 5H, Ar-*H*), 6.87 (m, 2H, Ar-*H*), 5.62 (d,  $J = 1.5$  Hz, 1H, H-1), 4.84 (d,  $J = 10.6$  Hz, 1H,  $\text{OCH}_a\text{H}_b\text{Ph}$ ), 4.56 (d,  $J = 10.6$  Hz, 1H,  $\text{OCH}_a\text{H}_b\text{Ph}$ ), 4.15 – 4.05 (m, 1H, H-5), 3.88 (dd,  $J = 2.9, 1.6$  Hz, 1H, H-2), 3.84 (t,  $J = 9.6$  Hz, 1H, H-4), 3.80 (s, 3H,  $\text{OCH}_3$ ), 3.79 – 3.72 (m, 2H, H-6, H-6'), 3.61 (dd,  $J = 9.7, 2.9$  Hz, 1H, H-3), 3.56 (s, 3H,  $\text{OCH}_3$ ), 3.50 (s, 3H,  $\text{OCH}_3$ ), 1.77 (t,  $J = 6.5$  Hz, 1H, O-*H*);  $^{13}\text{C NMR}$  (100 MHz,  $\text{CDCl}_3$ )  $\delta$  159.3, 134.0, 131.6, 130.5, 129.6, 129.1, 127.6, 113.8, 84.9, 81.9, 78.7, 74.8, 74.5, 72.8, 62.2, 58.3, 57.8, 55.2; HRMS (ESI)  $m/z$  calcd for  $\text{C}_{22}\text{H}_{28}\text{O}_6\text{SNa}$   $[\text{M}+\text{Na}]^+$ , 443.1504; found, 443.1517.

**(6R) Phenyl 6-*C*-Allyl-4-*O*-benzyl-2,3-di-*O*-methyl-1-thio- $\alpha$ -D-mannopyranoside (7) and (6S)**

**Phenyl 6-*C*-Allyl-4-*O*-benzyl-2,3-di-*O*-methyl-1-thio- $\alpha$ -D-mannopyranoside (9)**

To a stirred solution of primary alcohol **5** (1.3 g, 3.33 mmol) and  $\text{NaHCO}_3$  (1.4 g, 16.66 mmol) in  $\text{CH}_2\text{Cl}_2$  (20 ml) was added Dess-Martin periodinane (2.8 g, 6.66 mmol) at room temperature. This reaction mixture was allowed to react for 8 h at room temperature before  $\text{Et}_2\text{O}$  (50 ml) and a saturated aqueous solution of  $\text{NaHCO}_3/\text{Na}_2\text{S}_2\text{O}_3$  (120 ml) were added. After stirring additional 2 h, the organic phase was extracted with  $\text{Et}_2\text{O}$  (3  $\times$  20 ml), dried over  $\text{Na}_2\text{SO}_4$ , and evaporated under high vacuum to give an oil which was used for further reaction without purification. The crude product was dissolved in dry THF (10 ml), after which allylmagnesium chloride (16.7 ml, 16.7 mmol) was added at 0 °C. The reaction mixture was stirred for 15 min at 0 °C before TLC (30% ethyl acetate in hexane) showed reaction completion. The reaction mixture was quenched

with sat.  $\text{NH}_4\text{Cl}$  solution (10 ml), extracted with ethyl acetate, and dried over  $\text{Na}_2\text{SO}_4$ . The ethyl acetate layer was dried and concentrated. Silica gel column chromatography purification (eluent: 30% ethyl acetate in hexane) afforded **7** (0.50 g, 35%) and **9** (0.57 g, 40%) as a colorless oils.

**7**:  $R_f = 0.45$  (hexane/EtOAc 7:3);  $[\alpha]_D^{22} = +179.0$  ( $c$  1.05,  $\text{CH}_2\text{Cl}_2$ );  $^1\text{H}$  NMR (400 MHz,  $\text{CDCl}_3$ )  $\delta$  7.50 – 7.27 (m, 10H, Ar-*H*), 5.85 – 5.75 (m, 1H,  $\text{CH}_2\text{CH}=\text{CH}_a\text{H}_b$ ), 5.63 (d,  $J = 1.7$  Hz, 1H, H-1), 5.05 – 5.02 (m, 2H,  $\text{CH}_2\text{CH}=\text{CH}_a\text{H}_b$ ), 4.99 (d,  $J = 11.0$  Hz, 1H,  $\text{OCH}_a\text{H}_b\text{Ph}$ ), 4.66 (d,  $J = 11.0$  Hz, 1H,  $\text{OCH}_a\text{H}_b\text{Ph}$ ), 4.09 (dd,  $J = 9.5, 4.8$  Hz, 1H, H-5), 3.94 – 3.92 (m, 1H, H-6), 3.90 (t,  $J = 9.3$  Hz, 1H, H-4), 3.89 – 3.87 (m, 1H, H-2), 3.65 (dd,  $J = 8.9, 3.0$  Hz, 1H, H-3), 3.53 (s, 3H,  $\text{OCH}_3$ ), 3.50 (s, 3H,  $\text{OCH}_3$ ), 2.63 (d,  $J = 4.4$  Hz, 1H, O-*H*), 2.36 – 2.28 (m, 1H, H-7), 2.22 – 2.13 (m, 1H, H-7');  $^{13}\text{C}$  NMR (100 MHz,  $\text{CDCl}_3$ )  $\delta$  137.9, 135.1, 133.9, 131.5, 129.14, 128.5, 128.0, 127.8, 127.6, 117.1, 84.7, 82.2, 78.3, 76.7, 74.9, 73.6, 71.9, 58.3, 57.5, 36.7; HRMS (ESI)  $m/z$  calcd for  $\text{C}_{24}\text{H}_{30}\text{O}_5\text{SNa}$   $[\text{M}+\text{Na}]^+$ , 453.1712; found, 453.1710.

**9**:  $R_f = 0.40$  (hexane/EtOAc 7:3);  $[\alpha]_D^{22} = +154.0$  ( $c$  0.45,  $\text{CH}_2\text{Cl}_2$ );  $^1\text{H}$  NMR (400 MHz,  $\text{CDCl}_3$ )  $\delta$  7.46 – 7.27 (m, 10H, Ar-*H*), 5.78 – 5.71 (m, 1H,  $\text{CH}_2\text{CH}=\text{CH}_a\text{H}_b$ ), 5.72 (d,  $J = 1.5$  Hz, 1H, H-1), 5.02 (dd,  $J = 10.2, 1.0$  Hz, 1H,  $\text{CH}_2\text{CH}=\text{CH}_a\text{H}_b$ ), 4.98 (dd,  $J = 17.2, 1.0$  Hz, 1H,  $\text{CH}_2\text{CH}=\text{CH}_a\text{H}_b$ ), 4.92 (d,  $J = 10.8$  Hz, 1H,  $\text{OCH}_a\text{H}_b\text{Ph}$ ), 4.69 (d,  $J = 10.8$  Hz, 1H,  $\text{OCH}_a\text{H}_b\text{Ph}$ ), 4.04 (t,  $J = 9.9$  Hz, 1H, H-4), 3.93 – 3.91 (m, 2H, H-5, H-6), 3.87 (dd,  $J = 2.9, 1.5$  Hz, 1H, H-2), 3.60 (dd,  $J = 9.3, 2.9$  Hz, 1H, H-3), 3.55 (s, 3H,  $\text{OCH}_3$ ), 3.51 (s, 3H,  $\text{OCH}_3$ ), 2.28 (dt,  $J = 15.1, 7.8$  Hz, 1H, H-7), 2.15 (dt,  $J = 14.1, 5.8$  Hz, 1H, H-7'), 1.83 (s, 1H, O-*H*);  $^{13}\text{C}$  NMR (100 MHz,  $\text{CDCl}_3$ )  $\delta$  138.7, 138.5, 134.7, 130.6, 129.0, 128.4, 127.9, 127.6, 127.2, 117.5, 84.7, 82.0, 78.7, 75.3, 74.6, 73.7, 68.6, 58.4, 57.9, 38.6; HRMS (ESI)  $m/z$  calcd for  $\text{C}_{24}\text{H}_{30}\text{O}_5\text{SNa}$   $[\text{M}+\text{Na}]^+$ , 453.1712; found, 453.1714.

**(6R) Phenyl 6-C-Allyl-4-O-*p*-methoxybenzyl-2,3-di-O-methyl-1-thio- $\alpha$ -D-mannopyranoside (8)**

Compound **8** (35%, 0.50 g) was synthesized analogously as **7** from mannopyranoside **6**, as a colorless oil.  $R_f = 0.35$  (hexane/EtOAc 6:4);  $[\alpha]_D^{22} = +168.8$  ( $c$  0.85,  $\text{CH}_2\text{Cl}_2$ );  $^1\text{H}$  NMR (400 MHz,  $\text{CDCl}_3$ )  $\delta$  7.49 – 7.47 (m, 2H, Ar-*H*), 7.34 – 7.24 (m, 5H, Ar-*H*), 6.89 – 6.87 (m, 2H, Ar-*H*), 5.85 – 5.75 (m, 1H,  $\text{CH}_2\text{CH}=\text{CH}_a\text{H}_b$ ), 5.64 (d,  $J = 1.4$  Hz, 1H, H-1), 5.05 – 5.01 (m, 2H,  $\text{CH}_2\text{CH}=\text{CH}_a\text{H}_b$ ), 4.91 (d,  $J = 10.6$  Hz, 1H,  $\text{OCH}_a\text{H}_b\text{Ph}$ ), 4.60 (d,  $J = 10.6$  Hz, 1H,  $\text{OCH}_a\text{H}_b\text{Ph}$ ),



4.05 (dd,  $J = 9.5, 4.9$  Hz, 1H, H-5), 3.94 – 3.84 (m, 3H, H-2, H-3, H-6), 3.79 (s, 3H, OCH<sub>3</sub>), 3.63 (dd,  $J = 9.2, 2.9$  Hz, 1H, H-3), 3.54 (s, 3H, OCH<sub>3</sub>), 3.50 (s, 3H, OCH<sub>3</sub>), 2.68 (d,  $J = 4.3$  Hz, 1H, O-H), 2.33 – 2.23 (m, 1H, H-7), 2.22 – 2.11 (m, 1H, H-7'); <sup>13</sup>C NMR (100 MHz, CDCl<sub>3</sub>)  $\delta$  159.4, 135.1, 134.0, 131.5, 130.0, 129.8, 129.2, 127.5, 117.0, 114.0, 84.8, 82.2, 78.4, 76.6, 74.6, 73.6, 72.0, 58.3, 57.5, 55.2, 36.8; HRMS (ESI)  $m/z$  calcd for C<sub>25</sub>H<sub>32</sub>O<sub>6</sub>SNa [M+Na]<sup>+</sup>, 483.1817; found, 483.1800.

**(6S) Phenyl 6-C-Allyl-4-O-*p*-methoxybenzyl-2,3-di-O-methyl-1-thio- $\alpha$ -D-mannopyranoside (10)**

Compound **10** (32%, 0.45 g) was synthesized analogously as **9** from mannopyranoside **6**, as a colorless oil.  $R_f = 0.30$  (hexane/EtOAc 6:4);  $[\alpha]_D^{22} = +180.0$  ( $c$  0.30, CH<sub>2</sub>Cl<sub>2</sub>); <sup>1</sup>H NMR (400 MHz, CDCl<sub>3</sub>)  $\delta$  7.46 – 7.44 (m, 2H, Ar-H), 7.33 – 7.27 (m, 5H, Ar-H), 6.89 – 6.87 (m, 2H, Ar-H), 5.80 – 5.69 (m, 1H, CH<sub>2</sub>CH=CH<sub>a</sub>H<sub>b</sub>), 5.72 (d,  $J = 1.5$  Hz, 1H, H-1), 5.02 (dd,  $J = 10.7, 1.9$  Hz, 1H, CH<sub>2</sub>CH=CH<sub>a</sub>H<sub>b</sub>), 4.97 (dd,  $J = 17.7, 1.9$  Hz, 1H, CH<sub>2</sub>CH=CH<sub>a</sub>H<sub>b</sub>), 4.84 (d,  $J = 10.2$  Hz, 1H, OCH<sub>a</sub>H<sub>b</sub>Ph), 4.62 (d,  $J = 10.2$  Hz, 1H, OCH<sub>a</sub>H<sub>b</sub>Ph), 4.02 (t,  $J = 9.3$  Hz, 1H, H-4), 3.93 – 3.89 (m, 2H, H-5, H-6), 3.87 (dd,  $J = 3.4, 1.9$  Hz, 1H, H-2), 3.80 (s, 3H, OCH<sub>3</sub>), 3.58 (dd,  $J = 9.3, 3.4$  Hz, 1H, H-3), 3.56 (s, 3H, OCH<sub>3</sub>), 3.50 (s, 3H, OCH<sub>3</sub>), 2.28 (dt,  $J = 15.2, 7.8$  Hz, 1H, H-7), 2.18 – 2.09 (m, 1H, H-7'), 1.84 (d,  $J = 8.3$  Hz, 1H, O-H); <sup>13</sup>C NMR (100 MHz, CDCl<sub>3</sub>)  $\delta$  159.2, 134.8, 130.7, 130.6, 129.7, 129.1, 127.2, 117.5, 113.9, 84.8, 82.0, 78.8, 75.0, 74.4, 73.8, 68.6, 58.4, 57.9, 55.2, 38.6; HRMS (ESI)  $m/z$  calcd for C<sub>25</sub>H<sub>32</sub>O<sub>6</sub>SNa [M+Na]<sup>+</sup>, 483.1817; found, 483.1812.

**(6R) Phenyl 6-C-Allyl-4-O-benzyl-2,3,6-tri-O-methyl-1-thio- $\alpha$ -D-mannopyranoside (11)**

Compound **11** was synthesized from **7** in 72% (0.38 g) yield following procedure as used for **4**, as a colorless oil.  $R_f = 0.60$  (hexane/EtOAc 7:3);  $[\alpha]_D^{22} = +128.0$  ( $c$  0.15, CH<sub>2</sub>Cl<sub>2</sub>); <sup>1</sup>H NMR (600 MHz, CDCl<sub>3</sub>)  $\delta$  7.59 – 7.48 (m, 2H, Ar-H), 7.38 – 7.25 (m, 8H, Ar-H), 5.87 – 5.81 (m, 1H, CH<sub>2</sub>CH=CH<sub>a</sub>H<sub>b</sub>), 5.63 (d,  $J = 1.7$  Hz, 1H, H-1), 5.06 (dd,  $J = 17.1, 1.5$  Hz, 1H, CH<sub>2</sub>CH=CH<sub>a</sub>H<sub>b</sub>), 5.03 (dd,  $J = 10.3, 1.4$  Hz, 1H, CH<sub>2</sub>CH=CH<sub>a</sub>H<sub>b</sub>), 4.91 (d,  $J = 11.0$  Hz, 1H, OCH<sub>a</sub>H<sub>b</sub>Ph), 4.65 (d,  $J = 11.0$  Hz, 1H, OCH<sub>a</sub>H<sub>b</sub>Ph), 4.36 (d,  $J = 10.1$  Hz, 1H, H-5), 3.87 (dd,  $J = 2.8, 1.8$  Hz, 1H, H-2), 3.83 (t,  $J = 9.3$  Hz, 1H, H-4), 3.62 (dd,  $J = 8.9, 3.0$  Hz, 1H, H-3), 3.54 (s, 3H), 3.53 – 3.50 (m, 1H, H-6), 3.48 (s, 3H, OCH<sub>3</sub>), 3.38 (s, 3H, OCH<sub>3</sub>), 2.44 (ddd,  $J = 15.5, 8.2, 7.4$  Hz, 1H, H-7), 2.34 – 2.28 (m, 1H, H-7'); <sup>13</sup>C NMR (150 MHz, CDCl<sub>3</sub>)  $\delta$  138.5, 136.0, 134.8, 131.5, 129.0,

128.4, 128.0, 127.7, 127.4, 116.4, 85.0, 82.3, 80.5, 78.4, 75.1, 74.8, 71.9, 57.8, 57.7, 57.6, 34.9; HRMS (ESI)  $m/z$  calcd for  $C_{25}H_{32}O_5SNa [M+Na]^+$ , 467.1868; found, 467.1875.

**(6R) Phenyl 6-C-Allyl-4-O-p-methoxybenzyl-2,3,6-tri-O-methyl-1-thio- $\alpha$ -D-mannopyranoside (12)**

Compound **12** (82%, 1.68 g) was synthesized analogously as **11** from compound **8**, as a colorless oil.  $R_f = 0.60$  (hexane/EtOAc 7:3);  $[\alpha]_D^{22} = +171.8$  ( $c$  1.35,  $CH_2Cl_2$ );  $^1H$  NMR (400 MHz,  $CDCl_3$ )  $\delta$  7.53 – 7.49 (m, 2H, Ar-*H*), 7.34 – 7.24 (m, 5H, Ar-*H*), 6.94 – 6.83 (m, 2H, Ar-*H*), 5.83 (ddt,  $J = 17.0, 10.2, 6.8$  Hz, 1H,  $CH_2CH=CH_aH_b$ ), 5.62 (d,  $J = 1.9$  Hz, 1H, H-1), 5.08 (dd,  $J = 17.4, 1.4$  Hz, 1H,  $CH_2CH=CH_aH_b$ ), 5.03 (dd,  $J = 8.3, 1.4$  Hz, 1H,  $CH_2CH=CH_aH_b$ ), 4.82 (d,  $J = 10.6$  Hz, 1H,  $OCH_aH_bPh$ ), 4.57 (d,  $J = 10.6$  Hz, 1H,  $OCH_aH_bPh$ ), 4.32 (dd,  $J = 9.8, 1.2$  Hz, 1H, H-5), 3.86 (dd,  $J = 2.9, 1.9$  Hz, 1H, H-2), 3.82 (t,  $J = 9.7$  Hz, 1H, H-4), 3.81 (s, 3H,  $OCH_3$ ), 3.60 (dd,  $J = 8.9, 3.1$  Hz, 1H, H-3), 3.55 (s, 3H,  $OCH_3$ ), 3.52 – 3.49 (m, 1H, H-6), 3.47 (s, 3H,  $OCH_3$ ), 3.37 (s, 3H,  $OCH_3$ ), 2.47 – 2.38 (m, 1H, H-7), 2.32 – 2.24 (m, 1H, H-7');  $^{13}C$  NMR (100 MHz,  $CDCl_3$ )  $\delta$  159.3, 136.1, 134.8, 131.4, 130.6, 129.7, 129.0, 127.4, 116.3, 113.8, 85.0, 82.3, 80.3, 78.4, 74.7, 74.5, 71.9, 57.8, 57.7, 57.4, 55.3, 34.8; HRMS (ESI)  $m/z$  calcd for  $C_{26}H_{34}O_6SNa [M+Na]^+$ , 497.1974; found, 497.1978.

**(6S) Phenyl 6-C-Allyl-4-O-benzyl-2,3,6-tri-O-methyl-1-thio- $\alpha$ -D-mannopyranoside (13)**

Compound **13** (78%, 0.41 g) was synthesized analogously as **11** from Compound **9**, as a colorless oil.  $R_f = 0.70$  (hexane/EtOAc 7:3);  $[\alpha]_D^{22} = +163.5$  ( $c$  1.10,  $CH_2Cl_2$ );  $^1H$  NMR (600 MHz,  $CDCl_3$ )  $\delta$  7.45 – 7.44 (m, 2H, Ar-*H*), 7.35 – 7.33 (m, 4H, Ar-*H*), 7.33 – 7.27 (m, 3H, Ar-*H*), 7.21 (t,  $J = 7.3$  Hz, 1H, Ar-*H*), 5.82 (s, 1H, H-1), 5.66 – 5.59 (m, 1H,  $CH_2CH=CH_aH_b$ ), 4.96 (d,  $J = 11.0$  Hz, 1H,  $OCH_aH_bPh$ ), 4.90 (dd,  $J = 10.3, 0.7$  Hz, 1H,  $CH_2CH=CH_aH_b$ ), 4.86 (dd,  $J = 18.3, 1.4$  Hz, 1H,  $CH_2CH=CH_aH_b$ ), 4.60 (d,  $J = 11.0$  Hz, 1H,  $OCH_aH_bPh$ ), 4.05 (t,  $J = 9.5$  Hz, 1H, H-4), 3.95 (d,  $J = 9.5$  Hz, 1H, H-5), 3.85 (dd,  $J = 3.3, 1.4$  Hz, 1H, H-2), 3.61 – 3.59 (m, 1H, H-6), 3.56 (dd,  $J = 9.2, 3.3$  Hz, 1H, H-3), 3.52 (s, 3H,  $OCH_3$ ), 3.49 (s, 3H,  $OCH_3$ ), 3.36 (s, 3H,  $OCH_3$ ), 2.48 – 2.41 (m, 1H, H-7), 2.27 – 2.20 (m, 1H, H-8);  $^{13}C$  NMR (150 MHz,  $CDCl_3$ )  $\delta$  138.7, 135.2, 134.3, 129.4, 129.0, 128.4, 127.7, 127.6, 126.7, 117.5, 84.3, 82.3, 78.9, 76.8, 75.0, 74.4, 72.3, 58.5, 57.7, 57.6, 33.4; HRMS (ESI)  $m/z$  calcd for  $C_{25}H_{32}O_5SNa [M+Na]^+$ , 467.1868; found, 467.1869.

**(6S) Phenyl 6-C-Allyl-4-O-p-methoxybenzyl-2,3,6-tri-O-methyl-1-thio- $\alpha$ -D-mannopyranoside (14)**

Compound **14** (90%, 1.85) was synthesized analogously as **11** from compound **10**, as a colorless oil.  $R_f = 0.60$  (hexane/EtOAc 1:1);  $[\alpha]_D^{22} = +158.2$  ( $c$  0.35,  $\text{CH}_2\text{Cl}_2$ );  $^1\text{H NMR}$  (400 MHz,  $\text{CDCl}_3$ )  $\delta$  7.45 – 7.42 (m, 2H, Ar-*H*), 7.31 – 7.18 (m, 5H, Ar-*H*), 6.90 – 6.87 (m, 2H, Ar-*H*), 5.82 (d,  $J = 1.4$  Hz, 1H, H-1), 5.63 (ddt,  $J = 17.2, 10.3, 7.2$  Hz, 1H,  $\text{CH}_2\text{CH}=\text{CH}_a\text{H}_b$ ), 4.91 – 4.89 (m, 1H,  $\text{CH}_2\text{CH}=\text{CH}_a\text{H}_b$ ), 4.88 (d,  $J = 10.6$  Hz, 1H,  $\text{OCH}_a\text{H}_b\text{Ph}$ ), 4.84 (dd,  $J = 17.2, 1.6$  Hz, 1H,  $\text{CH}_2\text{CH}=\text{CH}_a\text{H}_b$ ), 4.54 (d,  $J = 10.6$  Hz, 1H,  $\text{OCH}_a\text{H}_b\text{Ph}$ ), 4.04 (t,  $J = 9.5$  Hz, 1H, H-4), 3.93 (dd,  $J = 9.7, 1.3$  Hz, 1H, H-5), 3.85 (dd,  $J = 3.2, 1.6$  Hz, 1H, H-2), 3.80 (s, 3H,  $\text{OCH}_3$ ), 3.64 – 3.57 (m, 1H, H-6), 3.56 (dd,  $J = 9.7, 3.4$  Hz, 1H, H-3), 3.54 (s, 3H,  $\text{OCH}_3$ ), 3.49 (s, 3H,  $\text{OCH}_3$ ), 3.39 (s, 3H,  $\text{OCH}_3$ ), 2.49 – 2.41 (m, 1H, H-7), 2.28 – 2.18 (m, 1H, H-7');  $^{13}\text{C NMR}$  (100 MHz,  $\text{CDCl}_3$ )  $\delta$  159.2, 135.3, 134.3, 130.9, 129.4, 129.3, 129.0, 126.7, 117.2, 113.8, 84.3, 82.3, 78.9, 77.4, 74.8, 74.1, 72.9, 58.5, 57.7, 57.6, 55.3, 33.4; HRMS (ESI)  $m/z$  calcd for  $\text{C}_{26}\text{H}_{34}\text{O}_6\text{SNa}$   $[\text{M}+\text{Na}]^+$ , 497.1974; found, 497.1972.

**Phenyl 4-O-benzyl-7-deoxy-2,3,6-tri-O-methyl-D-glycero- $\alpha$ -D-thio-mannoopyranoside (15)**

Compound **15** (85%, 0.22 g) was synthesized analogously as **16** from compound **11**, as a colorless oil.  $R_f = 0.30$  (hexane/EtOAc 4:6);  $[\alpha]_D^{22} = +182.0$  ( $c$  1.45,  $\text{CH}_2\text{Cl}_2$ );  $^1\text{H NMR}$  (600 MHz,  $\text{CDCl}_3$ )  $\delta$  7.54 – 7.46 (m, 2H, Ar-*H*), 7.37 – 7.22 (m, 8H, Ar-*H*), 5.62 (d,  $J = 1.6$  Hz, 1H, H-1), 4.89 (d,  $J = 11.0$  Hz, 1H,  $\text{OCH}_a\text{H}_b\text{Ph}$ ), 4.63 (d,  $J = 11.0$  Hz, 1H,  $\text{OCH}_a\text{H}_b\text{Ph}$ ), 4.35 (dd,  $J = 9.9, 1.2$  Hz, 1H, H-5), 3.86 (dd,  $J = 2.9, 1.9$  Hz, 1H, H-2), 3.75 (t,  $J = 9.1$  Hz, 1H, H-4), 3.71 – 3.63 (m, 3H, H-6, H-8, H-8'), 3.59 (dd,  $J = 3.0, 9.1$  Hz, 1H, H-3), 3.53 (s, 3H,  $\text{OCH}_3$ ), 3.45 (s, 3H,  $\text{OCH}_3$ ), 3.36 (s, 3H,  $\text{OCH}_3$ ), 2.46 (br s, 1H, O-*H*), 1.95 (ddt,  $J = 15.6, 9.9, 5.8$  Hz, 1H, H-7), 1.64 – 1.55 (m, 1H, H-7');  $^{13}\text{C NMR}$  (150 MHz,  $\text{CDCl}_3$ )  $\delta$  138.3, 134.8, 131.1, 129.0, 128.5, 128.3, 127.8, 127.4, 84.9, 82.3, 79.7, 78.4, 74.8, 74.7, 71.4, 60.9, 57.8, 57.6, 57.0, 32.2; HRMS (ESI)  $m/z$  calcd for  $\text{C}_{24}\text{H}_{32}\text{O}_6\text{SNa}$   $[\text{M}+\text{Na}]^+$ , 471.1817; found, 471.1806.

**Phenyl 4-O-p-methoxybenzyl-7-deoxy-2,3,6-tri-O-methyl-D-glycero- $\alpha$ -D-thio-mannoopyranoside (16)**

Ozone gas was bubbled through a solution of olefin **12** (1.6 g, 3.37 mmol) in CH<sub>2</sub>Cl<sub>2</sub>/MeOH (200 ml/100 ml) at -78 °C until the solution turned to faint blue color. Ar gas was bubbled through solution for 5 min to remove excess ozone. To this mixture was added NaBH<sub>4</sub> (0.79 g, 33.6 mmol) at -78 °C and the reaction mixture slowly brought to room temperature, stirred for 3 h before solvents were evaporated under reduced pressure. The crude reaction mixture was extracted with EtOAc (3 x 30 ml), washed with hydrochloric acid (1 M), brine, dried over Na<sub>2</sub>SO<sub>4</sub>, and concentrated. Silica gel column chromatography (eluent: hexane/ethyl acetate = 50:50) afforded **16** (1.3 g, 81%) as a colorless oil. *R*<sub>f</sub> = 0.20 (hexane/EtOAc 4:6); [ $\alpha$ ]<sub>D</sub><sup>22</sup> = +181.1 (*c* 1.80, CH<sub>2</sub>Cl<sub>2</sub>); <sup>1</sup>H NMR (400 MHz, CDCl<sub>3</sub>)  $\delta$  7.51 – 7.49 (m, 2H, Ar-*H*), 7.32 – 7.23 (m, 5H, Ar-*H*), 6.89 – 6.87 (m, 2H, Ar-*H*), 5.62 (d, *J* = 0.9 Hz, 1H, H-1), 4.82 (d, *J* = 10.7 Hz, 1H, OCH<sub>a</sub>H<sub>b</sub>Ph), 4.57 (d, *J* = 10.7 Hz, 1H, OCH<sub>a</sub>H<sub>b</sub>Ph), 4.34 (d, *J* = 9.7 Hz, 1H, H-5), 3.86 (t, *J* = 2.4 Hz, 1H, H-2), 3.80 (s, 3H, OCH<sub>3</sub>), 3.73 (t, *J* = 9.7 Hz, 1H, H-4), 3.70 – 3.67 (m, 3H, H-6, H-8, H-8'), 3.59 (dd, *J* = 8.8, 2.9 Hz, 1H, H-3), 3.55 (s, 3H, OCH<sub>3</sub>), 3.46 (s, 3H, OCH<sub>3</sub>), 3.36 (s, 3H, OCH<sub>3</sub>), 2.55 (br s, 1H, O-*H*), 2.00 – 1.91 (m, 1H, H-7), 1.63 – 1.56 (m, 1H, H-7'); <sup>13</sup>C NMR (100 MHz, CDCl<sub>3</sub>)  $\delta$  159.4, 134.8, 131.1, 130.4, 129.9, 129.0, 127.4, 113.9, 84.9, 82.5, 79.9, 78.4, 74.5, 74.3, 71.3, 61.1, 57.8, 57.7, 57.0, 55.3, 32.1; HRMS (ESI) *m/z* calcd for C<sub>25</sub>H<sub>34</sub>O<sub>7</sub>SNa [M+Na]<sup>+</sup>, 501.1923; found, 501.1900.

**Phenyl 4-*O*-benzyl-7-deoxy-2,3,6-tri-*O*-methyl-L-glycero- $\alpha$ -D-thio-mannoopyranoside (17)**

Compound **17** (70%, 0.14 g) was synthesized analogously as **16** from compound **13**, as a colorless oil. *R*<sub>f</sub> = 0.30 (hexane/EtOAc 4:6); [ $\alpha$ ]<sub>D</sub><sup>22</sup> = +145.1 (*c* 2.00, CH<sub>2</sub>Cl<sub>2</sub>); <sup>1</sup>H NMR (600 MHz, CDCl<sub>3</sub>)  $\delta$  7.46 – 7.40 (m, 2H, Ar-*H*), 7.38 – 7.31 (m, 4H, Ar-*H*), 7.30 – 7.25 (m, 3H, Ar-*H*), 7.22 (t, *J* = 7.4 Hz, 1H, Ar-*H*), 5.81 (d, *J* = 1.4 Hz, 1H, H-1), 4.98 (d, *J* = 11.0 Hz, 1H, OCH<sub>a</sub>H<sub>b</sub>Ph), 4.63 (d, *J* = 11.0 Hz, 1H, OCH<sub>a</sub>H<sub>b</sub>Ph), 4.04 (t, *J* = 9.5 Hz, 1H, H-4), 3.92 (dd, *J* = 9.5, 1.1 Hz, 1H, H-5), 3.85 (dd, *J* = 3.0, 1.4 Hz, 1H, H-2), 3.81 – 3.78 (m, 1H, H-6), 3.59 (dd, *J* = 9.2, 3.2 Hz, 1H, H-3), 3.54 – 3.53 (m, 2H, H-8, H-8'), 3.52 (s, 3H, OCH<sub>3</sub>), 3.49 (s, 3H, OCH<sub>3</sub>), 3.37 (s, 3H, OCH<sub>3</sub>), 1.90 (dq, *J* = 13.3, 6.5 Hz, 1H, H-7), 1.65 (dq, *J* = 13.2, 6.2 Hz, 1H, H-7'), 1.52 (s, 1H, O-*H*); <sup>13</sup>C NMR (150 MHz, CDCl<sub>3</sub>)  $\delta$  138.6, 134.6, 129.9, 129.0, 128.4, 127.8, 127.6, 126.9, 84.3, 82.4, 78.6, 75.3, 75.0, 74.5, 73.4, 59.5, 58.3, 57.9, 57.5, 32.1; HRMS (ESI) *m/z* calcd for C<sub>24</sub>H<sub>32</sub>O<sub>6</sub>SNa [M+Na]<sup>+</sup>, 471.1817; found, 471.1823.

**Phenyl 4-*O*-*p*-methoxybenzyl-7-deoxy-2,3,6-tri-*O*-methyl-L-glycero- $\alpha$ -D-thio-mannoopyranoside (18)**

Compound **18** (88%, 2.0 g) was synthesized analogously as **16** from compound **14**, as a colorless oil.  $[\alpha]_D^{22} = +154.7$  ( $c$  0.70, CH<sub>2</sub>Cl<sub>2</sub>); <sup>1</sup>H NMR (400 MHz, CDCl<sub>3</sub>)  $\delta$  7.44 – 7.42 (m, 2H, Ar-*H*), 7.32 – 7.21 (m, 5H, Ar-*H*), 6.89 – 6.87 (m, 2H, Ar-*H*), 5.82 (d,  $J = 1.4$  Hz, 1H, H-1), 4.90 (d,  $J = 10.7$  Hz, 1H, OCH<sub>a</sub>H<sub>b</sub>Ph), 4.57 (d,  $J = 10.7$  Hz, 1H, OCH<sub>a</sub>H<sub>b</sub>Ph), 4.03 (t,  $J = 9.2$  Hz, 1H, H-4), 3.91 (dd,  $J = 9.7, 1.4$  Hz, 1H, H-5), 3.85 (dd,  $J = 1.4, 3.4$  Hz, 1H, H-2), 3.82 – 3.78 (m, 1H, H-6), 3.80 (s, 3H, OCH<sub>3</sub>), 3.89 (dd,  $J = 9.2, 3.4$  Hz, 1H), 3.57 – 3.56 (m, 2H, H-8, H-8'), 3.54 (s, 3H, OCH<sub>3</sub>), 3.50 (s, 3H, OCH<sub>3</sub>), 3.41 (s, 3H, OCH<sub>3</sub>), 1.91 (dq,  $J = 13.1, 6.5$  Hz, 1H, H-7), 1.71 – 1.60 (m, 1H, H-7'), 1.46 (br s, 1H, O-*H*); <sup>13</sup>C NMR (100 MHz, CDCl<sub>3</sub>)  $\delta$  159.2, 134.6, 130.8, 129.9, 129.5, 129.1, 126.9, 113.7, 84.3, 82.4, 78.6, 75.5, 74.7, 74.3, 73.5, 59.7, 58.5, 57.9, 57.6, 55.3, 32.2; HRMS (ESI)  $m/z$  calcd for C<sub>25</sub>H<sub>34</sub>O<sub>7</sub>SNa [M+Na]<sup>+</sup>, 501.1923; found, 501.1916.

**Phenyl 7-deoxy-2,3,6-tri-*O*-methyl-D-glycero- $\alpha$ -D-thio-mannoofuranoside (19)**

To a stirred solution of mannopyranoside **15** (50 mg, 0.11 mmol) in CH<sub>2</sub>Cl<sub>2</sub> (1.0 ml) was added BCl<sub>3</sub> (0.13 ml, 1M solution in CH<sub>2</sub>Cl<sub>2</sub>) at –78 °C. The reaction mixture was stirred additional 3h at –78 °C before it was quenched with NaHCO<sub>3</sub> solution. After extraction of aqueous phase with CH<sub>2</sub>Cl<sub>2</sub> (2 x 10 ml), the combined organic extracts were washed with water (10 ml), dried over Na<sub>2</sub>SO<sub>4</sub>, and concentrated. Silica gel column purification (eluent: 100% ethyl acetate) afforded **19** (25 mg, 64 %) as a colorless oil.  $R_f = 0.30$  (EtOAc/MeOH 9:1);  $[\alpha]_D^{22} = -185.1$  ( $c$  0.35, CH<sub>2</sub>Cl<sub>2</sub>); <sup>1</sup>H NMR (400 MHz, CDCl<sub>3</sub>)  $\delta$  7.57 – 7.44 (m, 2H, Ar-*H*), 7.42 – 7.15 (m, 3H, Ar-*H*), 5.65 (d,  $J = 5.8$  Hz, 1H, H-1), 4.46 (dd,  $J = 2.9, 8.3$  Hz, 1H, H-5), 4.10 – 4.02 (m, 3H, H-2, H-3, H-4), 3.81 (ddd,  $J = 11.7, 8.3, 3.9$  Hz, 1H, H-6), 3.74 – 3.72 (m, 1H, H-8), 3.71 – 3.66 (m, 1H, H-8'), 3.64 (s, 3H, OCH<sub>3</sub>), 3.57 (s, 3H, OCH<sub>3</sub>), 3.42 (s, 3H, OCH<sub>3</sub>), 2.83 (br s, 2H, O-*H*), 1.95 – 1.91 (m, 1H, H-7), 1.85 – 1.74 (m, 1H, H-7'); <sup>13</sup>C NMR (100 MHz, CDCl<sub>3</sub>)  $\delta$  136.7, 130.6, 128.9, 126.7, 89.8, 82.6, 81.1, 79.9, 79.0, 68.6, 60.5, 60.4, 59.5, 57.3, 30.7; HRMS (ESI)  $m/z$  calcd for C<sub>17</sub>H<sub>26</sub>O<sub>6</sub>SNa [M+Na]<sup>+</sup>, 381.1348; found, 381.1340.

**Phenyl 5,8-anhydro-7-deoxy-2,3,6-tri-*O*-methyl-D-glycero- $\alpha$ -D-thio-mannoofuranoside (20)**

To a stirred solution of mannopyranoside **15** (50 mg, 0.11 mmol) in CH<sub>2</sub>Cl<sub>2</sub> (1 ml) was added BCl<sub>3</sub> (0.13 ml, 1M solution in CH<sub>2</sub>Cl<sub>2</sub>) at -78 °C. The reaction mixture was stirred for further 3 h before it was quenched with NaHCO<sub>3</sub> solution. After extraction of aqueous phase with CH<sub>2</sub>Cl<sub>2</sub> (2 x 10 ml), the combined organic extracts were washed with water (10 ml), dried over Na<sub>2</sub>SO<sub>4</sub>, and concentrated. The crude residue was dissolved in pyridine (1.0 ml), to which then was added TsCl (29.2 mg, 0.15 mmol) and DMAP (1.7 mg) at room temperature. This reaction mixture was stirred for additional 8 h before solvents were evaporated under high vacuum. The crude residue was purified through silica gel column chromatography (eluent: 40% ethyl acetate in hexane) to give **20** (66% over 2 steps, 25 mg,) as a white solid.  $R_f = 0.50$  (hexane/EtOAc 1:1);  $[\alpha]_D^{22} = \text{Mp} = 88 - 90$  °C;  $[\alpha]_D^{22} = -201.4$  ( $c$  0.55, CH<sub>2</sub>Cl<sub>2</sub>); <sup>1</sup>H NMR (600 MHz, CDCl<sub>3</sub>)  $\delta$  7.54 – 7.44 (m, 2H, Ar-*H*), 7.26 – 7.23 (m, 2H, Ar-*H*), 7.22 – 7.11 (m, 1H, Ar-*H*), 5.65 (d,  $J = 6.6$  Hz, 1H, H-1), 4.34 (d,  $J = 7.3$  Hz, 1H, H-5), 4.19 – 4.18 (m, H-6), 4.08 (dd,  $J = 4.0, 6.6$  Hz, 1H, H-2), 3.93 – 3.91 (m, 1H, H-3), 3.92 – 3.91 (m, 1H, H-8), 3.86 – 3.82 (m, 1H, H-8'), 3.77 (dd,  $J = 7.7, 4.0$  Hz, 1H, H-4), 3.62 (s, 3H, OCH<sub>3</sub>), 3.52 (s, 3H, OCH<sub>3</sub>), 3.31 (s, 3H, OCH<sub>3</sub>), 1.99 – 1.84 (m, 2H, H-7, H-7'); <sup>13</sup>C NMR (151 MHz, CDCl<sub>3</sub>)  $\delta$  137.5, 130.5, 128.7, 126.4, 89.7, 83.0, 83.0, 81.6, 81.1, 78.9, 67.4, 60.7, 58.8, 56.7, 32.6; HRMS (ESI)  $m/z$  calcd for C<sub>17</sub>H<sub>24</sub>O<sub>5</sub>SNa [M+Na]<sup>+</sup>, 363.1242; found, 363.1249.

#### **Phenyl 7-deoxy-2,3,6-tri-*O*-methyl-L-glycero- $\alpha$ -D-thio-mannoctofuranoside (21)**

Compound **21** (66%, 26mg) was synthesized analogously as **19** from **17**, as a colorless oil.  $R_f = 0.30$  (EtOAc/MeOH 9:1);  $[\alpha]_D^{22} = -142.0$  ( $c$  1.15, CH<sub>2</sub>Cl<sub>2</sub>); <sup>1</sup>H NMR (400 MHz, CDCl<sub>3</sub>)  $\delta$  7.50 – 7.48 (m, 2H), 7.30 – 7.19 (m, 3H), 5.65 (d,  $J = 6.4$  Hz, 1H), 4.16 – 4.05 (m, 4H), 3.82 – 3.67 (m, 3H), 3.62 (s, 3H), 3.56 (s, 3H), 2.42 (s, 3H), 2.90 (br s, 2H), 2.01 – 1.86 (m, 2H); <sup>13</sup>C NMR (100 MHz, CDCl<sub>3</sub>)  $\delta$  136.8, 130.5, 128.8, 126.6, 89.7, 82.6, 79.9, 79.0, 76.7, 71.4, 60.4, 59.4, 58.8, 58.4, 33.1; HRMS (ESI)  $m/z$  calcd for C<sub>17</sub>H<sub>26</sub>O<sub>6</sub>SNa [M+Na]<sup>+</sup>, 381.1348; found, 381.1343.

#### **Phenyl 5,8-anhydro-7-deoxy-2,3,6-tri-*O*-methyl-L-glycero- $\alpha$ -D-thio-mannoctofuranoside (22)**

Compound **22** (54%, 20 mg) was synthesized analogously as **20** from **17**, as a colorless oil.  $R_f = 0.50$  (hexane/EtOAc 1:1);  $[\alpha]_D^{22} = -151.6$  ( $c$  0.50, CH<sub>2</sub>Cl<sub>2</sub>); <sup>1</sup>H NMR (600 MHz, CDCl<sub>3</sub>)  $\delta$  7.51 – 7.50 (m, 2H, Ar-*H*), 7.26 – 7.24 (m 2H, Ar-*H*), 7.18 (t,  $J = 7.4$  Hz, 1H, Ar-*H*), 5.69 (d,  $J = 6.6$

Hz, 1H, H-1), 4.23 (dd,  $J = 9.6, 4.0$  Hz, 1H, H-4), 4.15 (dd,  $J = 4.0, 6.2$  Hz, 1H, H-2), 4.12 (dd,  $J = 9.5, 3.3$  Hz, 1H, H-5), 4.00 – 3.94 (m, 3H, H-3, H-6, H-8), 3.92 – 3.86 (m, 1H, H-8'), 3.62 (s, 3H, OCH<sub>3</sub>), 3.52 (s, 3H, OCH<sub>3</sub>), 3.37 (s, 3H, OCH<sub>3</sub>), 2.11 (ddd,  $J = 13.3, 6.8, 2.9$  Hz, 1H, H-7), 1.98 – 1.89 (m, 1H, H-7'); <sup>13</sup>C NMR (150 MHz, CDCl<sub>3</sub>)  $\delta$  137.7, 130.3, 128.6, 126.3, 89.4, 82.9, 81.1, 79.4, 79.3, 78.2, 66.8, 60.7, 58.8, 57.1, 30.9; HRMS (ESI)  $m/z$  calcd for C<sub>17</sub>H<sub>24</sub>O<sub>5</sub>SNa [M+Na]<sup>+</sup>, 363.1242; found, 363.1245.

### Phenyl 7-deoxy-2,3,6-tri-*O*-methyl-D-glycero- $\alpha$ -D-thio-mannoctopyranoside (**23**)

To a stirred solution of compound **16** (1.3 g, 2.71 mmol) in CH<sub>2</sub>Cl<sub>2</sub>/H<sub>2</sub>O (36:4; v/v) was added DDQ (1.2 g, 5.43 mmol) at room temperature. The reaction was stirred at room temperature for 0.5 h before TLC (5% methanol in ethyl acetate) showed reaction completion. The reaction mixture was quenched with sat. NaHCO<sub>3</sub> solution, extracted with CH<sub>2</sub>Cl<sub>2</sub> (3 x 30 ml), dried over Na<sub>2</sub>SO<sub>4</sub>, and concentrated. Column chromatography on silica gel (eluent: methanol/ethyl acetate =1:9) afforded **23** (0.8 g, 82%) as a colorless oil.  $R_f = 0.40$  (EtOAc/MeOH 9.5:0.5);  $[\alpha]_D^{22} = +132.4$  ( $c$  2.50, CH<sub>2</sub>Cl<sub>2</sub>); <sup>1</sup>H NMR (400 MHz, CDCl<sub>3</sub>)  $\delta$  7.51 – 7.47 (m, 2H, Ar-*H*), 7.34 – 7.23 (m, 3H, Ar-*H*), 5.65 (d,  $J = 1.6$  Hz, 1H, H-1), 4.24 (dd,  $J = 9.6, 4.0$  Hz, 1H, H-5), 3.92 (t,  $J = 9.3$  Hz, 1H, H-4), 3.87 (dd,  $J = 3.0, 1.7$  Hz, 1H, H-2), 3.76 – 3.69 (m, 3H, H-6, H-8, H-8'), 3.51 (s, 3H, OCH<sub>3</sub>), 3.45 (s, 3H, OCH<sub>3</sub>), 3.43 (dd,  $J = 9.7, 3.1$  Hz, 1H, H-3), 3.41 (s, 3H, OCH<sub>3</sub>), 3.27 (br s, 1H, O-*H*), 2.41 (br s, 1H, O-*H*), 1.97 – 1.79 (m, 2H, H-7, H-7'); <sup>13</sup>C NMR (100 MHz, CDCl<sub>3</sub>)  $\delta$  134.6, 130.9, 129.1, 127.4, 85.1, 81.3, 80.4, 76.7, 71.6, 68.3, 60.1, 58.1, 57.5, 57.3, 32.0; HRMS (ESI)  $m/z$  calcd for C<sub>17</sub>H<sub>26</sub>O<sub>6</sub>SNa [M+Na]<sup>+</sup>, 381.1348; found, 381.1341.

### Phenyl 7-deoxy-2,3,6-tri-*O*-methyl-L-glycero- $\alpha$ -D-thio-mannoctopyranoside (**25**)

Compound **25** (89%, 0.87 g) was synthesized analogously as **23** from compound **18**, as a colorless oil.  $R_f = 0.50$  (EtOAc/MeOH 9.5:0.5);  $[\alpha]_D^{22} = +106.2$  ( $c$  0.35, CH<sub>2</sub>Cl<sub>2</sub>); <sup>1</sup>H NMR (400 MHz, CDCl<sub>3</sub>)  $\delta$  7.46 – 7.44 (m, 2H, Ar-*H*), 7.33 – 7.23 (m, 3H, Ar-*H*), 5.79 (br s 1H, H-1), 4.14 (t,  $J = 9.7$  Hz, 1H, H-4), 3.99 (d,  $J = 9.3$  Hz, 1H, H-5), 3.88 (br s, 1H, H-2), 3.79 (t,  $J = 6.0$  Hz, 1H, H-6), 3.68 – 3.65 (m, 2H, H-8, H-8'), 3.51 (s, 3H, OCH<sub>3</sub>), 3.50 (s, 3H, OCH<sub>3</sub>), 3.47 (s, 3H, OCH<sub>3</sub>), 3.44 – 3.43 (m, 1H, H-3), 2.67 (br s, 1H, O-*H*), 1.91 (dd,  $J = 13.6, 7.4$  Hz, 1H, H-7), 1.79 (br s, 1H, O-*H*), 1.64 (dd,  $J = 14.0, 5.9$  Hz, 1H, H-7'); <sup>13</sup>C NMR (150 MHz, CDCl<sub>3</sub>)  $\delta$  134.4,

130.3, 129.1, 127.1, 84.7, 81.4, 76.8, 73.3, 66.5, 60.2, 59.4, 58.4, 57.1, 33.0; HRMS (ESI)  $m/z$  calcd for  $C_{17}H_{26}O_6SNa [M+Na]^+$ , 381.1348; found, 381.1331.

**Phenyl 7-deoxy-2,3-di-*O*-methyl-4-*O*-(*p*-methoxybenzyl)-*D*-glycero- $\alpha$ -*D*-thio-mannoheptopyranoside (27)**

Compound **27** (12%, 50 mg) was synthesized analogously as **7** from compound **6**, as a colorless oil (MeMgI was used as a Grignard reagent).  $R_f = 0.45$  (hexane/EtOAc 6:4);  $[\alpha]_D^{22} = +167.5$  ( $c$  0.20,  $CH_2Cl_2$ );  $^1H$  NMR (400 MHz,  $CDCl_3$ )  $\delta$  7.48 – 7.47 (m, 2H, Ar-*H*), 7.38 – 7.21 (m, 5H, Ar-*H*), 6.89 – 6.87 (m, 2H, Ar-*H*), 5.63 (d,  $J = 1.5$  Hz, 1H, H-1), 4.91 (d,  $J = 10.6$  Hz, 1H,  $OCH_aH_bPh$ ), 4.58 (d,  $J = 10.5$  Hz, 1H,  $OCH_aH_bPh$ ), 4.03 – 3.94 (m, 2H, H-5, H-6), 3.87 (dd,  $J = 2.9, 1.5$  Hz, 1H, H-2), 3.84 – 3.75 (m, 1H, H-4), 3.80 (s, 3H,  $OCH_3$ ), 3.64 (dd,  $J = 9.0, 3.0$  Hz, 1H), 3.54 (s, 3H,  $OCH_3$ ), 3.52 (s, 3H,  $OCH_3$ ), 2.69 (d,  $J = 4.5$  Hz, 1H, O-*H*), 1.10 (d,  $J = 6.0$  Hz, 3H, H-7);  $^{13}C$  NMR (100 MHz,  $CDCl_3$ )  $\delta$  159.4, 133.8, 131.7, 130.1, 129.8, 129.1, 127.6, 113.9, 84.7, 82.3, 78.4, 74.7, 74.4, 68.7, 58.3, 57.5, 55.3, 18.2; HRMS (ESI)  $m/z$  calcd for  $C_{23}H_{30}O_6SNa [M+Na]^+$ , 357.1661; found, 357.1683.

**Phenyl 7-deoxy-2,3-di-*O*-methyl-4-*O*-(*p*-methoxybenzyl)-*L*-glycero- $\alpha$ -*D*-thio-mannoheptopyranoside (28)**

Compound **28** (61%, 0.31 g) was synthesized analogously as **7** from compound **6**, as a colorless oil (MeMgI was used as a Grignard reagent).  $R_f = 0.40$  (hexane/EtOAc 6:4);  $[\alpha]_D^{22} = +173.3$  ( $c$  0.15,  $CH_2Cl_2$ );  $^1H$  NMR (400 MHz,  $CDCl_3$ )  $\delta$  7.47 – 7.44 (m, 2H, Ar-*H*), 7.33 – 7.26 (m, 5H, Ar-*H*), 6.89 – 6.87 (m, 2H, Ar-*H*), 5.68 (d,  $J = 1.6$  Hz, 1H, H-1), 4.85 (d,  $J = 10.5$  Hz, 1H,  $OCH_aH_bPh$ ), 4.61 (d,  $J = 10.5$  Hz, 1H,  $OCH_aH_bPh$ ), 4.10 – 4.05 (m, 1H, H-6), 3.97 (t,  $J = 9.7$  Hz, 1H, H-4), 3.86 (dd,  $J = 2.8, 1.6$  Hz, 1H, H-2), 3.83 – 3.82 (m, 1H, H-5), 3.80 (s, 3H,  $OCH_3$ ), 3.60 (dd,  $J = 9.3, 2.8$  Hz, 1H, H-3), 3.57 (s, 3H,  $OCH_3$ ), 3.50 (s, 3H,  $OCH_3$ ), 1.78 (d,  $J = 8.1$  Hz, 1H, O-*H*), 1.14 (d,  $J = 6.5$  Hz, 3H, H-7);  $^{13}C$  NMR (100 MHz,  $CDCl_3$ )  $\delta$  159.3, 134.2, 131.3, 130.6, 129.8, 129.1, 127.5, 113.9, 84.9, 82.1, 78.7, 75.1, 75.0, 74.6, 65.4, 58.4, 57.9, 55.3, 20.2; HRMS (ESI)  $m/z$  calcd for  $C_{23}H_{30}O_6SNa [M+Na]^+$ , 357.1661; found, 357.1658.

**Phenyl 2,3-di-*O*-methyl-4-*O*-(*p*-methoxybenzyl)-6-*O*-(*p*-nitrobenzoyl)-*D*-glycero- $\alpha$ -*D*-thio-mannoheptopyranoside (29)**



A solution of **28** (0.5 g, 1.15 mmol), PPh<sub>3</sub> (0.60 g, 2.30 mmol) and *p*-nitrobenzoic acid (0.38 g, 2.30 mmol) in THF (15 ml) was treated with DIAD (0.45 ml, 2.30 mmol) at room temperature and stirred for 3 h. The reaction mixture was then concentrated and chromatographic purification on silica gel (20% ethyl acetate in hexane) afforded **29** (0.7 g, 89%) as a colorless oil.  $R_f = 0.7$  (hexane/EtOAc 7:3);  $[\alpha]_D^{22} = +51.7$  ( $c$  1.30, CH<sub>2</sub>Cl<sub>2</sub>); <sup>1</sup>H NMR (400 MHz, CDCl<sub>3</sub>)  $\delta$  8.22 – 8.11 (m, 2H, Ar-*H*), 8.07 – 7.97 (m, 2H, Ar-*H*), 7.47 – 7.45 (m, 2H, Ar-*H*), 7.36 – 7.20 (m, 5H, Ar-*H*), 6.93 – 6.86 (m, 2H, Ar-*H*), 5.77 (d,  $J = 1.3$  Hz, 1H, H-1), 5.48 (dq,  $J = 6.5, 1.9$  Hz, 1H, H-6), 4.89 (d,  $J = 10.8$  Hz, 1H, OCH<sub>a</sub>H<sub>b</sub>Ph), 4.57 (d,  $J = 10.7$  Hz, 1H, OCH<sub>a</sub>H<sub>b</sub>Ph), 4.35 (dd,  $J = 9.9, 1.9$  Hz, 1H, H-5), 3.89 (dd,  $J = 2.9, 1.5$  Hz, 1H, H-2), 3.80 (s, 3H, OCH<sub>3</sub>), 3.74 (t,  $J = 9.0$  Hz, 1H, H-4), 3.63 (dd,  $J = 9.3, 3.0$  Hz, 1H, H-3), 3.56 (s, 3H, OCH<sub>3</sub>), 3.51 (s, 3H, OCH<sub>3</sub>), 1.28 (d,  $J = 6.5$  Hz, 3H, H-7); <sup>13</sup>C NMR (100 MHz, CDCl<sub>3</sub>)  $\delta$  163.8, 159.4, 150.3, 135.9, 134.4, 130.7, 130.5, 130.1, 129.8, 129.0, 127.1, 123.3, 113.9, 84.0, 82.3, 78.2, 74.4, 74.1, 73.3, 71.3, 58.0, 57.7, 55.3, 13.6; HRMS (ESI)  $m/z$  calcd for C<sub>30</sub>H<sub>33</sub>NO<sub>9</sub>SNa [M+Na]<sup>+</sup>, 606.1774; found, 606.1771; The compound **29** (0.6 g, 1.02 mmol) was treated with K<sub>2</sub>CO<sub>3</sub> (0.17g, 1.23 mmol) in MeOH/CH<sub>2</sub>Cl<sub>2</sub> (15ml:1ml) at room temperature. After 6h, solvents were evaporated under high vacuum to give crude residue which was purified through silica gel column (eluent: 30% ethyl acetate in hexane) to give **27** (0.35 g., 78%) as a colorless oil.

**Phenyl 7-deoxy-2,3-di-*O*-methyl-4,6-*O*-(*p*-methoxybenzylidene)-*D*-glycero- $\alpha$ -*D*-thio-mannoheptopyranoside (**30**) and Phenyl 7-deoxy-2,3-di-*O*-methyl-*D*-glycero- $\alpha$ -*D*-thio-mannoheptopyranoside (**32**)**

A solution of **27** (0.35 g, 0.80 mmol) in CH<sub>3</sub>CN:H<sub>2</sub>O (8:2, 10 ml) was treated with DDQ (0.36 g, 1.60 mmol) at room temperature and stirred for 3h. The reaction mixture was then diluted with EtOAc and washed with a saturated solution of NaHCO<sub>3</sub>, water, and brine. The organic layer was dried over Na<sub>2</sub>SO<sub>4</sub> and concentrated under high vacuum. Column chromatography on silica gel afforded benzylidene acetal **30** (11%, 40 mg) and diol **32** (61%, 0.15g) as a colorless oils.

**30**:  $R_f = 0.80$  (hexane/EtOAc 6:4);  $[\alpha]_D^{22} = +208.0$  ( $c$  0.25, CH<sub>2</sub>Cl<sub>2</sub>); <sup>1</sup>H NMR (400 MHz, CDCl<sub>3</sub>)  $\delta$  7.51 – 7.49 (m, 2H, Ar-*H*), 7.45 – 7.43 (m, 2H, Ar-*H*), 7.36 – 7.25 (m, 3H, Ar-*H*), 6.90 – 6.86 (m, 2H, Ar-*H*), 5.67 (d,  $J = 1.0$  Hz, 1H, H-1), 5.63 (s, 1H, Benzylidene-*H*), 4.13 (t,  $J = 9.8$  Hz, 1H, H-4), 3.99 – 3.92 (m, 1H, H-6), 3.90 (dd,  $J = 3.4, 1.4$  Hz, 1H, H-2), 3.87 (t,  $J = 9.3$  Hz, 1H, H-5), 3.79 (s, 3H, OCH<sub>3</sub>), 3.72 (dd,  $J = 9.9, 3.4$  Hz, 1H, H-3), 3.58 (s, 3H, OCH<sub>3</sub>), 3.54 (s, 3H,

OCH<sub>3</sub>), 1.23 (d,  $J = 6.0$  Hz, 3H, H-7); <sup>13</sup>C NMR (101 MHz, CDCl<sub>3</sub>)  $\delta$  159.9, 133.8, 131.5, 130.2, 129.1, 127.6, 127.5, 113.6, 101.1, 85.7, 80.2, 78.3, 76.7, 75.0, 70.8, 59.1, 59.0, 55.3, 17.8; HRMS (ESI)  $m/z$  calcd for C<sub>23</sub>H<sub>28</sub>O<sub>6</sub>SNa [M+Na]<sup>+</sup>, 455.1504; found, 455.1511.

**32:**  $R_f = 0.10$  (hexane/EtOAc 6:4);  $[\alpha]_D^{22} = +128.2$  ( $c$  0.70, CH<sub>2</sub>Cl<sub>2</sub>); <sup>1</sup>H NMR (400 MHz, CDCl<sub>3</sub>)  $\delta$  7.50 – 7.47 (m, 2H, Ar-*H*), 7.35 – 7.25 (m, 3H, Ar-*H*), 5.65 (d,  $J = 1.3$  Hz, 1H, H-1), 4.07 – 4.00 (m, 1H, H-6), 3.97 (t,  $J = 9.3$  Hz, 1H, H-4), 3.92 – 3.86 (m, 2H, H-2, H-5), 3.50 (s, 3H, OCH<sub>3</sub>), 3.48 (s, 3H, OCH<sub>3</sub>), 3.46 (dd,  $J = 9.3, 3.1$  Hz, 1H, H-3), 2.54 (br s, 2H, O-*H*), 1.17 (t,  $J = 6.4$  Hz, 3H, H-7); <sup>13</sup>C NMR (100 MHz, CDCl<sub>3</sub>)  $\delta$  133.8, 131.5, 129.1, 127.6, 84.9, 81.1, 77.3, 74.5, 70.6, 70.0, 58.3, 57.1, 19.1. HRMS (ESI)  $m/z$  calcd for C<sub>15</sub>H<sub>22</sub>O<sub>5</sub>SNa [M+Na]<sup>+</sup>, 337.1086; found, 337.1093.

**Phenyl 7-deoxy-2,3-di-*O*-methyl-4,6-*O*-(*p*-methoxybenzylidene)-*L*-glycero- $\alpha$ -*D*-thio-mannoheptopyranoside (31)**

Compound **31** (5%, 17 mg) was synthesized analogously as **30** from **28**, as a colorless oil.  $R_f = 0.70$  (hexane/EtOAc 6:4);  $[\alpha]_D^{22} = +178.8$  ( $c$  1.40, CH<sub>2</sub>Cl<sub>2</sub>); <sup>1</sup>H NMR (400 MHz, CDCl<sub>3</sub>)  $\delta$  7.47 – 7.41 (m, 4H, Ar-*H*), 7.36 – 7.28 (m, 3H, Ar-*H*), 6.89 – 6.87 (m, 2H, Ar-*H*), 5.85 (s, 1H, Benzylidene-*H*), 5.63 (d,  $J = 1.4$  Hz, 1H, H-1), 4.51 (dd,  $J = 10.0, 5.7$  Hz, 1H, H-5), 4.44 – 4.39 (m, 1H, H-6), 4.36 (t,  $J = 9.8$  Hz, 1H, H-4), 3.89 (dd,  $J = 3.1, 1.4$  Hz, 1H, H-2), 3.80 (s, 3H, OCH<sub>3</sub>), 3.68 (dd,  $J = 9.6, 3.2$  Hz, 1H, H-3), 3.56 (s, 3H, OCH<sub>3</sub>), 3.51 (s, 3H, OCH<sub>3</sub>), 1.47 (d,  $J = 6.8$  Hz, 3H, H-7); <sup>13</sup>C NMR (100 MHz, CDCl<sub>3</sub>)  $\delta$  159.9, 134.1, 131.5, 130.4, 129.1, 127.6, 127.5, 113.6, 94.2, 85.9, 80.1, 78.5, 72.6, 70.4, 67.3, 59.0, 58.8, 55.3, 11.8; HRMS (ESI)  $m/z$  calcd for C<sub>23</sub>H<sub>28</sub>O<sub>6</sub>SNa [M+Na]<sup>+</sup>, 455.1504; found, 455.1514.

**Phenyl 7-deoxy-2,3-di-*O*-methyl-*L*-glycero- $\alpha$ -*D*-thio-mannoheptopyranoside (33)**

Compound **33** (70%, 0.18g) was synthesized analogously as **32** from **28**, as a colorless oil.  $R_f = 0.15$  (hexane/EtOAc 6:4);  $[\alpha]_D^{22} = +165.7$  ( $c$  1.05, CH<sub>2</sub>Cl<sub>2</sub>); <sup>1</sup>H NMR (400 MHz, CDCl<sub>3</sub>)  $\delta$  7.46 – 7.44 (m, 2H, Ar-*H*), 7.30 – 7.22 (m, 3H, Ar-*H*), 5.69 (d,  $J = 1.4$  Hz, 1H, H-1), 4.15 – 4.10 (m, 1H, H-6), 4.07 (t,  $J = 9.1$  Hz, 1H, H-4), 3.86 (dd,  $J = 1.4, 3.2$  Hz, 1H, H-2), 3.84 – 3.81 (m, 1H, H-5), 3.48 (s, 3H, OCH<sub>3</sub>), 3.44 (s, 3H, OCH<sub>3</sub>), 3.46 (dd,  $J = 9.8, 3.23$  Hz, 1H, H-3), 3.07 (br s, 2H, O-*H*), 1.15 (t,  $J = 6.4$  Hz, 3H, H-7); <sup>13</sup>C NMR (100 MHz, CDCl<sub>3</sub>)  $\delta$  134.2, 131.4, 129.1, 129.0, 127.4, 85.1, 81.5, 77.8, 76.8, 75.4, 66.4, 65.5, 58.4, 57.4, 19.7; HRMS (ESI)  $m/z$  calcd for C<sub>15</sub>H<sub>22</sub>O<sub>5</sub>SNa [M+Na]<sup>+</sup>, 337.1086; found, 337.1075.

**Methyl 4,8-anhydro-7-deoxy-2,3,6-tri-*O*-methyl-*D*-glycero- $\beta$ -*D*-mannooctopyranosyl-(1 $\rightarrow$ 6)-2',3',4'-tri-*O*-benzyl- $\alpha$ -*D*-glucopyranoside (39 $\beta$ ) and Methyl 4,8-anhydro-7-deoxy-2,3,6-tri-*O*-methyl-*D*-glycero- $\alpha$ -*D*-mannooctopyranosyl-(1 $\rightarrow$ 6)-2',3',4'-tri-*O*-benzyl- $\alpha$ -*D*-glucopyranoside (39 $\alpha$ )**

Coupling of **24** with **36** following the general procedure afforded **39 $\beta$**  and  **$\alpha$**  in 86% yield in 4.2:1 ratio (Repetition: Yield = 83%; 4.6:1= $\beta$ : $\alpha$ ). **39 $\beta$** :  $R_f$  = 0.30 (hexane/EtOAc 2:8);  $[\alpha]_D^{22}$  = +18.0 ( $c$  0.60, CH<sub>2</sub>Cl<sub>2</sub>); <sup>1</sup>H NMR (400 MHz, CDCl<sub>3</sub>)  $\delta$  7.38 – 7.27 (m, 15H, Ar-*H*), 4.98 (d,  $J$  = 10.8 Hz, 1H, OCH<sub>2</sub>Ph), 4.89 (d,  $J$  = 11.3 Hz, 1H, OCH<sub>2</sub>Ph), 4.81 (d,  $J$  = 10.8 Hz, 1H, OCH<sub>2</sub>Ph), 4.79 (d,  $J$  = 12.2 Hz, 1H, OCH<sub>2</sub>Ph), 4.66 (d,  $J$  = 12.2 Hz, 1H, OCH<sub>2</sub>Ph), 4.58 (d,  $J$  = 3.9 Hz, 1H, H-1'), 4.56 (d,  $J$  = 11.2 Hz, 1H, OCH<sub>2</sub>Ph), 4.23 (s, 1H, H-1), 4.17 (dd,  $J$  = 10.6, 1.7 Hz, 1H, H-6a'), 4.01 (t,  $J$  = 9.2 Hz, 1H, H-4'), 3.93 (t,  $J$  = 9.7 Hz, 1H, H-4), 3.89 – 3.82 (m, 1H, H-5'), 3.76 – 3.68 (m, 3H, H-6, H-8a, H-8b), 3.60 (d,  $J$  = 3.1 Hz, 1H, H-2), 3.56 (s, 3H, OCH<sub>3</sub>), 3.51 – 3.48 (m, 2H, H-2', H-6b'), 3.47 (s, 3H, OCH<sub>3</sub>), 3.43 (s, 3H, OCH<sub>3</sub>), 3.37 (s, 3H, OCH<sub>3</sub>), 3.39 – 3.33 (m, 1H, H-3'), 3.10 (dd,  $J$  = 9.8, 3.1 Hz, 1H, H-3), 3.02 (dd,  $J$  = 9.7, 2.4 Hz, 1H, H-5), 1.91 – 1.84 (m, 1H, H-7a), 1.73 – 1.61 (m, 1H, H-7b); <sup>13</sup>C NMR (100 MHz, CDCl<sub>3</sub>)  $\delta$  138.6, 138.3, 138.1, 128.5, 128.4, 128.3, 128.1, 128.0, 127.9, 127.8, 127.7, 127.7, 102.5 ( $J_{C-H}$  = 151.5 Hz, C-1), 97.7 ( $J_{C-H}$  = 162.1 Hz, C-1'), 82.1, 81.5, 79.9, 78.2, 77.2, 75.9, 75.1, 74.8, 73.9, 73.4, 71.5, 69.9, 69.0, 62.5, 61.7, 58.0, 57.3, 55.0, 30.1; HRMS (ESI)  $m/z$  calcd for C<sub>39</sub>H<sub>50</sub>O<sub>11</sub>Na [M+Na]<sup>+</sup>, 717.3251; found, 717.3254.

**39 $\alpha$** :  $R_f$  = 0.35 (hexane/EtOAc 2:8);  $[\alpha]_D^{22}$  = +26.0 ( $c$  0.25, CH<sub>2</sub>Cl<sub>2</sub>); <sup>1</sup>H NMR (600 MHz, CDCl<sub>3</sub>)  $\delta$  7.37 – 7.26 (m, 15H), 4.99 (d,  $J$  = 10.3 Hz, 1H), 4.98 (s, 1H), 4.96 (d,  $J$  = 10.3 Hz, 1H), 4.80 (d,  $J$  = 11.7 Hz, 1H), 4.77 (d,  $J$  = 9.2 Hz, 1H), 4.68 (d,  $J$  = 12.1 Hz, 1H), 4.60 (d,  $J$  = 9.2, 1H), 4.58 (d,  $J$  = 3.7 Hz, 1H), 4.00 (d,  $J$  = 9.5 Hz, 1H), 3.93 (d,  $J$  = 9.9 Hz, 1H), 3.90 (dd,  $J$  = 3.6, 10.6 Hz, 1H), 3.78 – 3.75 (m, 1H), 3.66 – 3.61 (m, 3H), 3.53 (t,  $J$  = 9.9 Hz, 1H), 3.53 (dd,  $J$  = 9.5, 3.6 Hz, 1H), 3.52 – 3.49 (m, 2H), 3.49 – 3.46 (m, 2H), 3.45 (s, 3H), 3.43 (s, 3H), 3.37 (s, 3H), 3.36 (s, 3H), 1.78 – 1.75 (m, 1H), 1.33 – 1.27 (m, 1H); <sup>13</sup>C NMR (100 MHz, CDCl<sub>3</sub>)  $\delta$  138.5, 138.3, 138.1, 128.5, 128.4, 128.4, 128.1, 127.8, 127.7, 127.6, 127.2, 98.5 ( $J_{C-H}$  = 168.0 Hz, C-1), 98.0 ( $J_{C-H}$  = 167.2 Hz, C-1'), 82.1, 79.9, 79.1, 77.6, 75.9, 74.7, 74.0, 73.4, 71.8, 71.1, 69.6, 66.2, 62.2, 60.0, 59.3, 57.6, 57.0, 55.2, 28.8; HRMS (ESI)  $m/z$  calcd for C<sub>39</sub>H<sub>50</sub>O<sub>11</sub>Na [M+Na]<sup>+</sup>, 717.3251; found, 717.3248.

**Methyl 4,8-anhydro-7-deoxy-2,3,6-tri-*O*-methyl-*D*-glycero- $\beta$ -*D*-mannooctopyranosyl-(1 $\rightarrow$ 4)-2',3',6'-tri-*O*-benzyl- $\alpha$ -*D*-glucopyranoside (40 $\beta$ ) and Methyl 4,8-anhydro-7-deoxy-2,3,6-tri-*O*-methyl-*D*-glycero- $\alpha$ -*D*-mannooctopyranosyl-(1 $\rightarrow$ 4)-2',3',6'-tri-*O*-benzyl- $\alpha$ -*D*-glucopyranoside (40 $\alpha$ )**

Coupling of **24** with **37** following the general procedure afforded **40 $\beta$**  and  **$\alpha$**  in 71% yield in 4.0:1 ratio (Repetition: Yield = 78%; 3.9:1= $\beta$ : $\alpha$ ) **40 $\beta$** :  $R_f$  = 0.40 (hexane/EtOAc 2:8);  $[\alpha]_D^{22}$  = +18.0 ( $c$  0.95, CH<sub>2</sub>Cl<sub>2</sub>); <sup>1</sup>H NMR (400 MHz, CDCl<sub>3</sub>)  $\delta$  7.38 – 7.22 (m, 15H, Ar-*H*), 5.07 (d,  $J$  = 12.0 Hz, 1H, OCH<sub>2</sub>Ph), 4.98 (d,  $J$  = 12.0 Hz, 1H, OCH<sub>2</sub>Ph), 4.73 (d,  $J$  = 12.4 Hz, 1H, OCH<sub>2</sub>Ph), 4.70 (d,  $J$  = 12.4 Hz, 1H, OCH<sub>2</sub>Ph), 4.62 (d,  $J$  = 3.4 Hz, 1H, H-1'), 4.61 (d,  $J$  = 12.2 Hz, 1H, OCH<sub>2</sub>Ph), 4.49 (d,  $J$  = 12.2 Hz, 1H, OCH<sub>2</sub>Ph), 4.48 (br s, 1H, H-1), 3.98 (t,  $J$  = 9.0 Hz, 1H, H-3'), 3.90 (t,  $J$  = 9.3 Hz, 1H, H-4), 3.85 – 3.77 (m, 3H, H-4', H-5', H-6a'), 3.68 – 3.63 (m, 3H, H-6b', H-8a, H-8b), 3.55 (dd,  $J$  = 9.3, 3.6 Hz, 1H, H-2'), 3.47 (s, 3H, OCH<sub>3</sub>), 3.42 (d,  $J$  = 2.7 Hz, 1H, H-2), 3.38 (s, 3H, OCH<sub>3</sub>), 3.37 (s, 3H, OCH<sub>3</sub>), 3.29 – 3.28 (m, 1H, H-6), 3.26 (s, 3H, OCH<sub>3</sub>), 2.92 (dd,  $J$  = 9.7, 2.9 Hz, 1H, H-3), 2.74 (dd,  $J$  = 9.8, 2.3 Hz, 1H, H-5), 1.66 (dd,  $J$  = 8.7, 7.2 Hz, 1H, H-7a), 1.41 – 1.29 (m, 1H, H-7b); <sup>13</sup>C NMR (100 MHz, CDCl<sub>3</sub>)  $\delta$  139.8, 138.1, 137.9, 128.5, 128.4, 128.1, 127.9, 127.8, 127.7, 126.8, 126.6, 102.1 ( $J_{C-H}$  = 155.7 Hz, C-1), 98.1 ( $J_{C-H}$  = 166.6 Hz, C-1'), 81.9, 80.3, 79.7, 77.4, 77.2, 76.7, 75.1, 74.5, 73.6, 73.5, 73.3, 71.3, 69.4, 68.8, 62.5, 61.4, 58.2, 57.4, 55.2, 30.3; HRMS (ESI)  $m/z$  calcd for C<sub>39</sub>H<sub>50</sub>O<sub>11</sub>Na [M+Na]<sup>+</sup>, 717.3251; found, 717.3246

**40 $\alpha$** :  $R_f$  = 0.45 (hexane/EtOAc 2:8);  $[\alpha]_D^{22}$  = +35.0 ( $c$  0.20, CH<sub>2</sub>Cl<sub>2</sub>); <sup>1</sup>H NMR (600 MHz, CDCl<sub>3</sub>)  $\delta$  7.36 – 7.23 (m, 15H), 5.31 (d,  $J$  = 1.4 Hz, 1H), 5.16 (d,  $J$  = 11.6 Hz, 1H), 4.69 (d,  $J$  = 12.1 Hz, 1H), 4.67 (d,  $J$  = 11.7 Hz, 1H), 4.61 (d,  $J$  = 3.7 Hz, 1H), 4.59 (d,  $J$  = 12.1 Hz, 1H), 4.58 (d,  $J$  = 11.7 Hz, 1H), 4.53 (d,  $J$  = 12.1 Hz, 1H), 3.93 (t,  $J$  = 9.9 Hz, 1H), 3.90 (t,  $J$  = 9.1 Hz, 1H), 3.74 – 3.64 (m, 5H), 3.55 (dd,  $J$  = 9.5, 3.7 Hz, 1H), 3.50 (dd,  $J$  = 10.2, 2.6 Hz, 1H), 3.48 (dd,  $J$  = 1.5, 2.9 Hz, 1H), 3.45 (d,  $J$  = 2.9 Hz, 1H), 3.41 (dd,  $J$  = 9.9, 2.9 Hz, 1H), 3.41 – 3.40 (m, 1H), 3.40 (s, 3H), 3.37 (s, 3H), 3.30 (s, 3H), 3.04 (s, 3H), 1.81 – 1.78 (m, 1H), 1.53 – 1.47 (m, 1H); <sup>13</sup>C NMR (150 MHz, CDCl<sub>3</sub>)  $\delta$  138.6, 138.1, 137.8, 128.5, 128.4, 128.3, 128.1, 127.9, 127.5, 127.4, 127.3, 126.7, 100.4 ( $J_{C-H}$  = 171.6 Hz, C-1), 97.7 ( $J_{C-H}$  = 168.1 Hz, C-1'), 81.6, 80.0, 78.9, 77.0, 76.8, 75.1, 73.9, 73.5, 73.1, 72.0, 71.8, 69.7, 69.4, 62.3, 60.0, 58.8, 57.4, 57.3, 55.3, 29.8; HRMS (ESI)  $m/z$  calcd for C<sub>39</sub>H<sub>50</sub>O<sub>11</sub>Na [M+Na]<sup>+</sup>, 717.3251; found, 717.3231.

**(1-Adamantanyl) 4,8-anhydro-7-deoxy-2,3,6-tri-O-methyl-D-glycero-β-D-mannoctopyranoside (41β) and (1-Adamantanyl) 4,8-anhydro-7-deoxy-2,3,6-tri-O-methyl-D-glycero-α-D-mannoctopyranoside (41α)**

Coupling of **24** with **38** following the general procedure afforded **41β** and **α** in 68% yield in 4.4:1 ratio (Repetition: Yield = 86%; 4.2:1 = β:α). **41β**:  $R_f = 0.50$  (hexane/EtOAc 1:1);  $[\alpha]_D^{22} = -59.8$  ( $c$  1.00, CH<sub>2</sub>Cl<sub>2</sub>); <sup>1</sup>H NMR (400 MHz, CDCl<sub>3</sub>) δ 4.64 (s, 1H, H-1), 3.93 (t,  $J = 9.8$  Hz, 1H, H-4), 3.74 – 3.67 (m, 3H, H-8a, H8b, H-6), 3.63 (s, 3H, OCH<sub>3</sub>), 3.53 (d,  $J = 2.9$  Hz, 1H, H-2), 3.47 (s, 3H, OCH<sub>3</sub>), 3.43 (s, 3H, OCH<sub>3</sub>), 3.17 (dd,  $J = 2.9, 9.8$  Hz, 1H, H-3), 3.04 (dd,  $J = 2.0, 9.3$  Hz, 1H, H-5), 2.14 (br s, 3H, Ada-*H*), 1.89 – 1.76 (m, 7H, H-7a, Ada-*H*), 1.73 – 1.66 (m, 1H, H-7b), 1.65 – 1.58 (m, 6H, Ada-*H*); <sup>13</sup>C NMR (100 MHz, CDCl<sub>3</sub>) δ 94.8 ( $J_{C-H} = 150.9$  Hz, C-1), 82.0, 78.8, 74.6, 74.2, 71.5, 62.4, 61.9, 57.9, 57.3, 42.4, 36.3, 30.6, 30.1; HRMS (ESI)  $m/z$  calcd for C<sub>21</sub>H<sub>34</sub>O<sub>6</sub>Na [M+Na]<sup>+</sup>, 405.2253; found, 405.2261.

**41α**:  $R_f = 0.55$  (hexane/EtOAc 1:1);  $[\alpha]_D^{22} = +25.3$  ( $c$  0.15, CH<sub>2</sub>Cl<sub>2</sub>); <sup>1</sup>H NMR (400 MHz, CDCl<sub>3</sub>) δ 5.37 (d,  $J = 1.5$  Hz, 1H, H-1), 3.98 (t,  $J = 9.8$  Hz, 1H, H-4), 3.77 – 3.74 (m, 2H, H-8a, H-8b), 3.72 (dd,  $J = 10.2, 2.4$  Hz, 1H, H-5), 3.63 (dd,  $J = 5.6, 2.6$  Hz, 1H, H-6), 3.57 (dd,  $J = 10.2, 3.4$  Hz, 1H, H-3), 3.48 (s, 6H, OCH<sub>3</sub>), 3.43 (dd,  $J = 2.9, 1.9$  Hz, 1H, H-2), 3.41 (s, 3H, OCH<sub>3</sub>), 2.14 (br s, 3H, Ada-*H*), 2.00 – 1.93 (m, 1H, H-7a), 1.83 – 1.77 (m, 6H, Ada-*H*), 1.75 – 1.71 (m, 1H, H-7b), 1.70 – 1.61 (m, 6H, Ada-*H*); <sup>13</sup>C NMR (100 MHz, CDCl<sub>3</sub>) δ 90.9 ( $J_{C-H} = 165.5$  Hz, C-1), 79.0, 78.6, 74.4, 74.2, 72.3, 70.6, 62.2, 59.1, 57.4, 57.0, 42.3, 36.3, 30.6, 29.1; HRMS (ESI)  $m/z$  calcd for C<sub>21</sub>H<sub>34</sub>O<sub>6</sub>Na [M+Na]<sup>+</sup>, 405.2253; found, 405.2265.

**Methyl 4,8-anhydro-7-deoxy-2,3,6-tri-O-methyl-L-glycero-β-D-mannoctopyranosyl-(1→6)-2',3',4'-tri-O-benzyl-α-D-glucopyranoside (42β) and Methyl 4,8-anhydro-7-deoxy-2,3,6-tri-O-methyl-L-glycero-α-D-mannoctopyranosyl-(1→6)-2',3',4'-tri-O-benzyl-α-D-glucopyranoside (42β)**

Coupling of **26** with **36** following the general procedure afforded **42β** and **α** in 88% yield in 8.7:1 ratio (Repetition: Yield = 82%; 8.2:1 = β:α). **42β**:  $R_f = 0.40$  (hexane/EtOAc 4:6);  $[\alpha]_D^{22} = +21.8$  ( $c$  1.50, CH<sub>2</sub>Cl<sub>2</sub>); <sup>1</sup>H NMR (600 MHz, CDCl<sub>3</sub>) δ 7.35 – 7.25 (m, 15H, Ar-*H*), 4.97 (d,  $J = 10.7$  Hz, 1H, OCH<sub>2</sub>Ph), 4.88 (d,  $J = 11.2$  Hz, 1H, OCH<sub>2</sub>Ph), 4.80 (d,  $J = 12.2$  Hz, 1H, OCH<sub>2</sub>Ph), 4.78 (d,  $J = 11.0$  Hz, 1H, OCH<sub>2</sub>Ph), 4.64 (d,  $J = 12.1$  Hz, 1H, OCH<sub>2</sub>Ph), 4.58 (d,  $J = 11.4$  Hz, 1H,

OCH<sub>2</sub>Ph), 4.55 (d,  $J = 3.5$  Hz, 1H, H-1'), 4.23 (s, 1H, H-1), 4.17 (dd,  $J = 10.2, 1.8$  Hz, 1H, H-6a'), 4.00 (t,  $J = 9.2$  Hz, 1H, H-4'), 3.97 (dd,  $J = 12.6, 3.4$  Hz, 1H, H-8a), 3.81 (ddd,  $J = 9.9, 5.7, 1.6$  Hz, 1H, H-5'), 3.56 (s, 3H, OCH<sub>3</sub>), 3.55 – 3.52 (m, 2H, H-2, H-6b'), 3.48 (dd,  $J = 9.5, 3.6$  Hz, 1H, H-2'), 3.46 (s, 3H, OCH<sub>3</sub>), 3.43 (s, 3H, OCH<sub>3</sub>), 3.42 – 3.40 (m, 3H, H-6, H-3', H-8b), 3.37 (t,  $J = 10.0$  Hz, 1H, H-4), 3.34 (s, 3H, OCH<sub>3</sub>), 3.15 (dd,  $J = 9.8, 3.2$  Hz, 1H, H-3), 2.92 (t,  $J = 9.1$  Hz, 1H, H-5), 1.98 (dd,  $J = 13.3, 5.1$  Hz, 1H, H-7a), 1.54 (ddd,  $J = 24.4, 13.1, 5.3$  Hz, 1H, H-7b); <sup>13</sup>C NMR (100 MHz, CDCl<sub>3</sub>)  $\delta$  138.6, 138.3, 138.1, 128.4, 128.4, 128.3, 128.1, 128.1, 127.9, 127.8, 127.7, 101.6 ( $J_{C-H} = 156.1$  Hz, C-1), 97.7 ( $J_{C-H} = 168.7$  Hz, C-1'), 82.1, 80.7, 79.91, 78.1, 77.9, 77.8, 77.2, 75.8, 75.9, 74.8, 73.4, 69.6, 68.6, 66.1, 62.0, 58.9, 57.6, 55.0, 31.8; HRMS (ESI)  $m/z$  calcd for C<sub>39</sub>H<sub>50</sub>O<sub>11</sub>Na [M+Na]<sup>+</sup>, 717.3251; found, 717.3238

**42 $\alpha$** :  $R_f = 0.45$  (hexane/EtOAc 4:6);  $[\alpha]_D^{22} = +28.6$  ( $c$  0.15, CH<sub>2</sub>Cl<sub>2</sub>); <sup>1</sup>H NMR (600 MHz, CDCl<sub>3</sub>)  $\delta$  7.45 – 7.16 (m, 15H), 4.98 (d,  $J = 10.6$  Hz, 1H), 4.97 (d,  $J = 1.8$  Hz, 1H), 4.91 (d,  $J = 10.8$  Hz, 1H), 4.81 (d,  $J = 10.6$  Hz, 1H), 4.79 (d,  $J = 12.1$  Hz, 1H), 4.67 (d,  $J = 12.6$  Hz, 1H), 4.65 (d,  $J = 11.0$  Hz, 1H), 4.59 (d,  $J = 3.4$  Hz, 1H), 4.00 (t,  $J = 9.3$  Hz, 1H), 3.98 – 3.92 (m, 2H), 3.77 – 3.74 (m, 1H), 3.68 (dd,  $J = 11.4, 1.8$  Hz, 1H), 3.63 (dd,  $J = 2.9, 1.5$  Hz, 1H), 3.54 – 3.51 (m, 3H), 3.46 (s, 6H), 3.44 – 3.39 (m, 4H), 3.39 (s, 3H), 3.36 (s, 3H), 1.98 (d,  $J = 13.1$  Hz, 1H), 1.42 – 1.37 (m, 1H); <sup>13</sup>C NMR (150 MHz, CDCl<sub>3</sub>)  $\delta$  138.5, 138.1, 138.0, 128.4, 128.3, 128.1, 128.0, 127.9, 127.8, 127.7, 97.9 ( $J_{C-H} = 170.7$  Hz, C-1, C-1'), 82.1, 79.9, 78.5, 78.0, 77.5, 76.8, 76.1, 75.9, 75.0, 73.5, 73.3, 69.7, 66.1, 60.0, 59.4, 57.8, 57.3, 55.1, 31.2; HRMS (ESI)  $m/z$  calcd for C<sub>39</sub>H<sub>50</sub>O<sub>11</sub>Na [M+Na]<sup>+</sup>, 717.3251; found, 717.3235

**Methyl 4,8-anhydro-7-deoxy-2,3,6-tri-*O*-methyl-L-glycero- $\beta$ -D-mannoctopyranosyl-(1 $\rightarrow$ 4)-2',3',6'-tri-*O*-benzyl- $\alpha$ -D-glucopyranoside (43 $\beta$ ) and Methyl 4,8-anhydro-7-deoxy-2,3,6-tri-*O*-methyl-L-glycero- $\alpha$ -D-mannoctopyranosyl-(1 $\rightarrow$ 4)-2',3',6'-tri-*O*-benzyl- $\alpha$ -D-glucopyranoside (43 $\alpha$ )**

Coupling of **26** with **37** following the general procedure afforded **43 $\beta$**  and  **$\alpha$**  in 75% yield in 10.6:1 ratio (Repetition: Yield = 72%; 9.2:1= $\beta$ : $\alpha$ ). **43 $\beta$** :  $R_f = 0.50$  (hexane/EtOAc 1:1);  $[\alpha]_D^{22} = +26.1$  ( $c$  1.05, CH<sub>2</sub>Cl<sub>2</sub>); <sup>1</sup>H NMR (400 MHz, CDCl<sub>3</sub>)  $\delta$  7.48 – 7.27 (m, 15H, Ar-*H*), 5.08 (d,  $J = 10.5$  Hz, 1H, OCH<sub>2</sub>Ph), 4.81 (d,  $J = 12.2$  Hz, 1H, OCH<sub>2</sub>Ph), 4.79 (d,  $J = 10.2$  Hz, 1H, OCH<sub>2</sub>Ph), 4.72 (d,  $J = 12.1$  Hz, 1H, OCH<sub>2</sub>Ph), 4.67 (d,  $J = 12.2$  Hz, 1H, OCH<sub>2</sub>Ph), 4.62 (d,  $J = 3.5$  Hz, 1H, H-1'), 4.45 (d,  $J = 12.1$  Hz, 1H, OCH<sub>2</sub>Ph), 4.39 (s, 1H, H-1), 3.96 (dd,  $J = 12.0, 4.0$  Hz, 1H, H-

8a), 3.92 – 3.86 (m, 2H, H-4', H-3'), 3.78 – 3.75 (m, 1H, H-5), 3.73 (dd,  $J = 10.8, 2.9$  Hz, 1H, H-6a'), 3.62 (dd,  $J = 10.7, 1.4$  Hz, 1H, H-6b'), 3.57 (s, 3H, OCH<sub>3</sub>), 3.48 – 3.42 (m, 2H, H-2, H-2'), 3.39 (s, 6H, OCH<sub>3</sub>), 3.38 – 3.36 (m, 1H, H-8b), 3.31 (t,  $J = 9.9$  Hz, 1H, H-4), 3.26 (s, 3H, OCH<sub>3</sub>), 3.12 – 3.06 (m, 1H, H-6), 2.92 (dd,  $J = 9.8, 2.9$  Hz, 1H, H-3), 2.79 (t,  $J = 9.0$  Hz, 1H, H-5), 1.92 – 1.84 (m, 1H, H-7a), 1.54 – 1.43 (m, 1H, H-7b); <sup>13</sup>C NMR (100 MHz, CDCl<sub>3</sub>)  $\delta$  139.5, 138.3, 137.6, 128.6, 128.6, 128.4, 128.3, 128.1, 128.0, 127.9, 127.8, 127.2, 100.4 ( $J_{C-H} = 157.3$  Hz, C-1), 98.5 ( $J_{C-H} = 168.1$  Hz, C-1'), 80.6, 80.4, 78.7, 78.0, 77.9, 75.9, 75.8, 75.2, 73.7, 73.5, 69.7, 68.3, 66.3, 61.5, 59.4, 57.4, 55.3, 32.1; HRMS (ESI)  $m/z$  calcd for C<sub>39</sub>H<sub>50</sub>O<sub>11</sub>Na [M+Na]<sup>+</sup>, 717.3251; found, 717.3260.

**43 $\alpha$** :  $R_f = 0.55$  (hexane/EtOAc 1:1);  $[\alpha]_D^{22} = +42.0$  ( $c$  0.10, CH<sub>2</sub>Cl<sub>2</sub>); <sup>1</sup>H NMR (400 MHz, CDCl<sub>3</sub>)  $\delta$  7.38 – 7.27 (m, 15H), 5.20 (br s, 1H), 5.17 (d,  $J = 12.9$  Hz, 1H), 4.70 (d,  $J = 12.2$  Hz, 1H), 4.69 (d,  $J = 11.7$  Hz, 1H), 4.68 (d,  $J = 11.4$  Hz, 1H), 4.62 (d,  $J = 3.2$  Hz, 1H), 4.52 (d,  $J = 12.1$  Hz, 1H), 4.54 (d,  $J = 11.7$  Hz, 1H), 4.01 – 3.97 (m, 1H), 3.91 – 3.85 (m, 2H), 3.81 – 3.75 (m, 1H), 3.69 (t,  $J = 9.3$  Hz, 1H), 3.55 (dd,  $J = 9.3, 3.3$  Hz, 1H), 3.53 – 3.49 (m, 3H), 3.46 – 3.42 (m, 4H), 3.40 (s, 3H), 3.39 (s, 3H), 3.36 (s, 3H), 3.07 (s, 3H), 2.08 – 2.02 (m, 1H), 1.52 – 1.46 (m, 1H); <sup>13</sup>C NMR (150 MHz, CDCl<sub>3</sub>)  $\delta$  138.7, 138.5, 137.8, 129.9, 128.4, 128.3, 128.2, 128.1, 127.9, 127.6, 127.4, 127.3, 126.6, 100.7 ( $J_{C-H} = 169.9$  Hz, C-1), 97.6 ( $J_{C-H} = 166.7$  Hz, C-1'), 81.4, 80.0, 78.6, 78.5, 78.3, 77.1, 76.2, 75.1, 74.1, 73.1, 73.0, 69.8, 69.5, 66.1, 60.0, 58.9, 57.6, 57.3, 55.2, 31.4; HRMS (ESI)  $m/z$  calcd for C<sub>39</sub>H<sub>50</sub>O<sub>11</sub>Na [M+Na]<sup>+</sup>, 717.3251; found, 717.3251.

**(1-Adamantanyl) 4,8-anhydro-7-deoxy-2,3,6-tri-*O*-methyl-L-glycero- $\beta$ -D-mannoctopyranoside (44 $\beta$ ) and (1-Adamantanyl) 4,8-anhydro-7-deoxy-2,3,6-tri-*O*-methyl-L-glycero- $\alpha$ -D-mannoctopyranoside (44 $\alpha$ )**

Coupling of **26** with **38** following the general procedure afforded **44 $\beta$**  and  **$\alpha$**  in 72% yield in 2.8:1 ratio (Repetition: Yield = 78%; 3.0:1 =  $\beta$ : $\alpha$ ). **44 $\beta$** :  $R_f = 0.20$  (hexane/EtOAc 6:4);  $[\alpha]_D^{22} = -49.0$  ( $c$  0.80, CH<sub>2</sub>Cl<sub>2</sub>); <sup>1</sup>H NMR (400 MHz, CDCl<sub>3</sub>)  $\delta$  4.72 (br s, 1H, H-1), 3.99 (dd,  $J = 11.9, 4.4$  Hz, 1H, H-8a), 3.66 (s, 3H, OCH<sub>3</sub>), 3.55 – 3.54 (m, 1H, H-2), 3.53 (s, 3H, OCH<sub>3</sub>), 3.49 (s, 3H, OCH<sub>3</sub>), 3.46 – 3.41 (m, 2H, H-6, H-8b), 3.39 (t,  $J = 9.3$  Hz, 1H, H-4), 3.25 (dd,  $J = 9.7, 3.2$  Hz, 1H, H-3), 2.95 (t,  $J = 9.1$  Hz, 1H, H-5), 2.16 (br s, 3H, Ada-*H*), 2.00 (dd,  $J = 13.2, 5.2$  Hz, 1H, H-7a), 1.90 – 1.80 (m, 6H, Ada-*H*), 1.66 – 1.51 (m, 7H, Ada-*H*, H-7b); <sup>13</sup>C NMR (100 MHz, CDCl<sub>3</sub>)  $\delta$

94.3 ( $J_{C-H} = 152.8$  Hz, C-1), 81.1, 79.2, 78.3, 77.5, 75.9, 74.9, 66.1, 62.3, 59.0, 57.6, 42.3, 36.2, 31.9, 30.6. HRMS (ESI)  $m/z$  calcd for  $C_{21}H_{34}O_6Na$   $[M+Na]^+$ , 405.2253; found, 405.2252.

**44 $\alpha$** :  $R_f = 0.25$  (hexane/EtOAc 6:4);  $[\alpha]_D^{22} = +35.7$  ( $c$  0.35,  $CH_2Cl_2$ );  $^1H$  NMR (400 MHz,  $CDCl_3$ )  $\delta$  5.31 (d,  $J = 1.6$  Hz, 1H, H-1), 4.01 (dd,  $J = 11.9, 4.2$  Hz, 1H, H-8a), 3.66 (t,  $J = 9.3$  Hz, 1H, H-5), 3.63 – 3.61 (m, 1H, H-3), 3.52 (s, 3H,  $OCH_3$ ), 3.49 (s, 6H,  $OCH_3$ ), 3.46 (dd,  $J = 3.1, 1.5$  Hz, 1H, H-2), 3.46 – 3.39 (m, 1H, H-8b), 3.43 (t,  $J = 9.7$  Hz, 1H, H-4), 3.40 – 3.24 (m, 1H, H-6), 2.15 (br s, 3H, *Ada-H*), 2.00 (dd,  $J = 13.2, 5.1$  Hz, 1H, H-7a), 1.89 – 1.80 (m, 6H, *Ada-H*), 1.68 – 1.55 (m, 7H, *Ada-H*, H-7b);  $^{13}C$  NMR (100 MHz,  $CDCl_3$ )  $\delta$  90.7 ( $J_{C-H} = 165.8$  Hz, C-1), 78.9, 78.7, 78.4, 76.8, 74.8, 73.7, 66.2, 59.3, 58.5, 57.7, 42.3, 36.2, 31.9, 30.6; HRMS (ESI)  $m/z$  calcd for  $C_{21}H_{34}O_6Na$   $[M+Na]^+$ , 405.2253; found, 405.2258.

**Phenyl 4,6-*O*-benzylidene-7-deoxy-2,3-di-*O*-methyl-L-glycero- $\beta$ -D-mannohetpopyranosyl-(1 $\rightarrow$ 6)-2',3',4'-tri-*O*-benzyl- $\alpha$ -D-glucopyranoside (45 $\beta$ ) and Phenyl 4,6-*O*-benzylidene-7-deoxy-2,3-di-*O*-methyl-L-glycero- $\alpha$ -D-mannohetpopyranosyl-(1 $\rightarrow$ 6)-2',3',4'-tri-*O*-benzyl- $\alpha$ -D-glucopyranoside (45 $\alpha$ )**

Coupling of **35** with **36** following the general procedure afforded **45 $\beta$**  and  **$\alpha$**  in 87% yield in 7.1:1 ratio (Repetition: Yield = 79%; 7.3:1 =  $\beta$ : $\alpha$ ). **45 $\beta$** :  $R_f = 0.50$  (hexane/EtOAc 1:1);  $[\alpha]_D^{22} = +5.3$  ( $c$  0.90,  $CH_2Cl_2$ );  $^1H$  NMR (400 MHz,  $CDCl_3$ )  $\delta$  7.47 – 7.28 (m, 20H, Ar-H), 5.84 (s, 1H, Benzylidene-H), 5.00 (d,  $J = 10.7$  Hz, 1H,  $OCH_2Ph$ ), 4.92 (d,  $J = 11.3$  Hz, 1H,  $OCH_2Ph$ ), 4.83 (d,  $J = 10.7$  Hz, 1H,  $OCH_2Ph$ ), 4.80 (d,  $J = 11.7$  Hz, 1H,  $OCH_2Ph$ ), 4.67 (d,  $J = 11.8$  Hz, 1H,  $OCH_2Ph$ ), 4.59 (d,  $J = 10.7$  Hz, 1H,  $OCH_2Ph$ ), 4.58 (d,  $J = 2.9$  Hz, 1H, H-1'), 4.53 – 4.46 (m, 1H, H-6), 4.29 (s, 1H, H-1), 4.20 (t,  $J = 9.8$  Hz, 1H, H-4), 4.15 (dd,  $J = 10.3, 1.9$  Hz, 1H, H-6a'), 4.01 (t,  $J = 9.3$  Hz, 1H, H-4'), 3.86 – 3.82 (m, 1H, H-5), 3.59 (s, 3H,  $OCH_3$ ), 3.55 (d,  $J = 2.9$  Hz, 1H, H-2), 3.53 (s, 3H,  $OCH_3$ ), 3.51 (dd,  $J = 9.3, 3.4$  Hz, 1H, H-3), 3.49 – 3.48 (m, 1H, H-6b'), 3.46 (dd,  $J = 10.6, 5.8$  Hz, 1H, H-2'), 3.39 (t,  $J = 9.3$  Hz, 1H, H-3'), 3.38 (s, 3H,  $OCH_3$ ), 3.29 (dd,  $J = 9.3, 2.9$  Hz, 1H, H-5), 1.49 (d,  $J = 6.8$  Hz, 3H, H-7);  $^{13}C$  NMR (100 MHz,  $CDCl_3$ )  $\delta$  138.6, 138.3, 138.1, 137.9, 128.7, 128.5, 128.4, 128.2, 128.1, 127.9, 127.9, 127.8, 127.7, 126.1, 102.3 ( $J_{C-H} = 156.5$  Hz, C-1), 97.8 ( $J_{C-H} = 166.6$  Hz, C-1'), 94.0, 82.2, 80.8, 79.9, 78.6, 77.9, 77.3, 77.2, 77.0, 76.9, 75.9, 74.8, 73.4, 72.2, 70.7, 69.8, 69.7, 69.0, 62.0, 58.9, 55.0, 11.9; HRMS (ESI)  $m/z$  calcd for  $C_{44}H_{52}O_{11}Na$   $[M+Na]^+$ , 779.3407; found, 779.3406



**45 $\alpha$** :  $R_f$  = 0.50 (hexane/EtOAc 1:1);  $[\alpha]_D^{22} = +80.0$  ( $c$  0.05, CH<sub>2</sub>Cl<sub>2</sub>); <sup>1</sup>H NMR (400 MHz, CDCl<sub>3</sub>)  $\delta$  7.43 – 7.29 (m, 20H), 5.84 (s, 1H), 5.01 (d,  $J$  = 10.8 Hz, 1H), 4.96 (d,  $J$  = 10.8 Hz, 1H), 4.93 (s, 1H), 4.82 (d,  $J$  = 10.8 Hz, 1H), 4.81 (d,  $J$  = 11.7 Hz, 1H), 4.68 (d,  $J$  = 11.7 Hz, 1H), 4.63 (d,  $J$  = 10.8 Hz, 1H), 4.60 (d,  $J$  = 3.4 Hz, 1H), 4.38 – 4.31 (m, 1H), 4.27 (t,  $J$  = 9.3 Hz, 1H), 4.04 – 4.00 (m, 2H), 3.85 (dd,  $J$  = 11.3, 4.4 Hz, 1H), 3.77 (dq,  $J$  = 4.8, 1.5 Hz, 1H), 3.67 – 3.62 (m, 3H), 3.58 – 3.50 (m, 2H), 3.52 (s, 3H), 3.48 (s, 3H), 3.39 (s, 3H), 1.46 (d,  $J$  = 6.9 Hz, 3H). <sup>13</sup>C NMR (101 MHz, CDCl<sub>3</sub>)  $\delta$  138.0, 128.7, 128.5, 128.1, 127.9, 127.8, 127.7, 126.2, 98.5 ( $J_{C-H} = 168.9$  Hz, C-1), 97.9 ( $J_{C-H} = 169.6$  Hz, C-1'), 94.2, 82.1, 79.9, 78.3, 77.3, 75.9, 75.0, 73.3, 72.5, 70.5, 69.7, 66.3, 59.6, 59.0, 55.2, 11.6; HRMS (ESI)  $m/z$  calcd for C<sub>44</sub>H<sub>52</sub>O<sub>11</sub>Na [M+Na]<sup>+</sup>, 779.3407; found, 779.3403

**Phenyl 4,6-*O*-benzylidene-7-deoxy-2,3-di-*O*-methyl-L-glycero- $\beta$ -D-mannohetpopyranosyl-(1 $\rightarrow$ 4)-2',3',6'-tri-*O*-benzyl- $\alpha$ -D-glucopyranoside (46 $\beta$ )**

Coupling of **35** with **37** following the general procedure afforded **46 $\beta$**  in 82% yield (Repetition: Yield = 76%;  $\beta$  only).  $R_f$  = 0.30 (hexane/EtOAc 6:4);  $[\alpha]_D^{22} = +4.8$  ( $c$  1.25, CH<sub>2</sub>Cl<sub>2</sub>); <sup>1</sup>H NMR (400 MHz, CDCl<sub>3</sub>)  $\delta$  7.45 – 7.24 (m, 20H, Ar-*H*), 5.76 (s, 1H, Benzylidene-H), 5.05 (d,  $J$  = 11.7 Hz, 1H, OCH<sub>2</sub>Ph), 4.88 (d,  $J$  = 11.7 Hz, 1H, OCH<sub>2</sub>Ph), 4.77 (d,  $J$  = 12.2 Hz, 1H, OCH<sub>2</sub>Ph), 4.74 (d,  $J$  = 11.7 Hz, 1H, OCH<sub>2</sub>Ph), 4.63 (d,  $J$  = 11.7 Hz, 1H, OCH<sub>2</sub>Ph), 4.61 (d,  $J$  = 3.4 Hz, 1H, H-1'), 4.51 (s, 1H, H-1), 4.46 (d,  $J$  = 12.2 Hz, 1H, OCH<sub>2</sub>Ph), 4.22 – 4.17 (m, 1H, H-6), 4.13 (t,  $J$  = 9.8 Hz, 1H, H-4), 3.93 – 3.88 (m, 2H, H-3', H-5'), 3.77 – 3.73 (m, 2H, H-4', H-6a'), 3.65 (dd,  $J$  = 10.2, 1.4 Hz, 1H, H-6b'), 3.57 – 3.55 (m, 1H, H-2'), 3.53 (s, 3H, OCH<sub>3</sub>), 3.47 (s, 3H, OCH<sub>3</sub>), 3.39 (s, 4H, OCH<sub>3</sub>, H-2), 3.28 (dd,  $J$  = 9.9, 5.8 Hz, 1H, H-3), 3.07 (dd,  $J$  = 9.6, 3.0 Hz, 1H, H-5), 1.26 (d,  $J$  = 6.9 Hz, 3H, H-7); <sup>13</sup>C NMR (100 MHz, CDCl<sub>3</sub>)  $\delta$  139.5, 138.2, 138.0, 137.7, 128.7, 128.6, 128.3, 128.1, 128.0, 128.0, 127.8, 127.1, 127.0, 126.2, 101.8 ( $J_{C-H} = 154.8$  Hz, C-1), 98.3 ( $J_{C-H} = 164.0$  Hz, C-1'), 94.0, 80.8, 80.3, 79.4, 78.9, 77.2, 74.9, 73.7, 73.5, 72.1, 70.5, 69.6, 69.5, 68.5, 61.7, 58.8, 55.3, 11.5; HRMS (ESI)  $m/z$  calcd for C<sub>44</sub>H<sub>52</sub>O<sub>11</sub>Na [M+Na]<sup>+</sup>, 779.3407; found, 779.3402.

**(1-Adamantanyl) 4,6-*O*-benzylidene-7-deoxy-2,3-di-*O*-methyl-L-glycero- $\beta$ -D-mannohetpopyranoside (47 $\beta$ ) and (1-Adamantanyl) 4,6-*O*-benzylidene-7-deoxy-2,3-di-*O*-methyl-L-glycero- $\alpha$ -D-mannohetpopyranoside (47 $\alpha$ )**

Coupling of **35** with **38** following the general procedure afforded **47 $\beta$**  and  **$\alpha$**  in 82% yield in 3.6:1 ratio (Repetition: Yield = 92%; 3.5:1 =  $\beta$ : $\alpha$ ). **47 $\beta$** :  $R_f$  = 0.40 (hexane/EtOAc 8:2);  $[\alpha]_D^{22} = -65.0$  ( $c$  0.60, CH<sub>2</sub>Cl<sub>2</sub>); <sup>1</sup>H NMR (400 MHz, CDCl<sub>3</sub>)  $\delta$  7.48 – 7.45 (m, 2H, Ar-*H*), 7.36 – 7.31 (m, 3H, Ar-*H*), 5.84 (s, 1H, Benzylidene-*H*), 4.78 (s, 1H, H-1), 4.51 – 4.43 (m, 1H, H-6), 4.21 (t,  $J$  = 9.7 Hz, 1H, H-4), 3.66 (s, 3H, OCH<sub>3</sub>), 3.55 (s, 3H, OCH<sub>3</sub>), 3.54 – 3.53 (m, 1H, H-2), 3.52 (dd,  $J$  = 9.7, 3.9 Hz, 1H, H-3), 3.38 (dd,  $J$  = 9.5, 3.2 Hz, 1H, H-5), 2.16 (br s, 3H, Ada-*H*), 1.88 – 1.86 (m, 6H, Ada-*H*), 1.69 – 1.57 (m, 6H, Ada-*H*), 1.50 (d,  $J$  = 6.9 Hz, 3H, H-7); <sup>13</sup>C NMR (100 MHz, CDCl<sub>3</sub>)  $\delta$  138.1, 128.7, 128.2, 126.2, 94.6 ( $J_{C-H}$  = 152.0 Hz, C-1), 94.0, 81.3, 80.5, 75.1, 72.2, 70.9, 69.5, 62.3, 58.8, 42.3, 36.2, 30.6, 12.0; HRMS (ESI)  $m/z$  calcd for C<sub>26</sub>H<sub>36</sub>O<sub>6</sub>Na [M+Na]<sup>+</sup>, 467.2410; found, 467.2404.

**47 $\alpha$** :  $R_f$  = 0.45 (hexane/EtOAc 8:2);  $[\alpha]_D^{22} = +14.6$  ( $c$  0.15, CH<sub>2</sub>Cl<sub>2</sub>); <sup>1</sup>H NMR (400 MHz, CDCl<sub>3</sub>)  $\delta$  7.50 – 7.48 (m, 2H, Ar-*H*), 7.40 – 7.28 (m, 3H, Ar-*H*), 5.87 (s, 1H, Benzylidene-*H*), 5.29 (d,  $J$  = 1.6 Hz, 1H, H-1), 4.31 – 4.24 (m, 1H, H-6), 4.27 (t,  $J$  = 9.3 Hz, 1H, H-4), 4.22 (dd,  $J$  = 5.3, 9.7 Hz, 1H, H-5), 3.75 (dd,  $J$  = 9.3, 3.2 Hz, 1H, H-3), 3.56 (s, 3H, OCH<sub>3</sub>), 3.52 (s, 3H, OCH<sub>3</sub>), 3.46 (dd,  $J$  = 3.1, 1.7 Hz, 1H, H-2), 2.15 (br s, 3H, Ada-*H*), 1.85 – 1.77 (m, 6H, Ada-*H*), 1.69 – 1.57 (m, 6H, Ada-*H*), 1.47 (d,  $J$  = 6.9 Hz, 3H, H-7); <sup>13</sup>C NMR (100 MHz, CDCl<sub>3</sub>)  $\delta$  128.6, 128.1, 126.2, 94.0, 91.4 ( $J_{C-H}$  = 167.1 Hz, C-1), 80.2, 78.4, 74.7, 73.0, 70.7, 65.8, 59.5, 59.0, 42.4, 36.2, 30.6, 11.7; HRMS (ESI)  $m/z$  calcd for C<sub>26</sub>H<sub>36</sub>O<sub>6</sub>Na [M+Na]<sup>+</sup>, 467.2410; found, 467.2398.

**Phenyl 4,6-*O*-benzylidene-7-deoxy-2,3-di-*O*-methyl-D-glycero- $\beta$ -D-mannohetpopyranosyl-(1 $\rightarrow$ 6)-2',3',4'-tri-*O*-benzyl- $\alpha$ -D-glucopyranoside (48 $\beta$ ) and Phenyl 4,6-*O*-benzylidene-7-deoxy-2,3-di-*O*-methyl-D-glycero- $\alpha$ -D-mannohetpopyranosyl-(1 $\rightarrow$ 6)-2',3',4'-tri-*O*-benzyl- $\alpha$ -D-glucopyranoside (48 $\alpha$ )**

Coupling of **34** with **36** following the general procedure afforded **48 $\beta$**  and  **$\alpha$**  in 82% yield in 7.4:1 ratio (Repetition: Yield = 76%; 7.7:1 =  $\beta$ : $\alpha$ ). **48 $\beta$** :  $R_f$  = 0.50 (hexane/EtOAc 6:4);  $[\alpha]_D^{22} = +21.7$  ( $c$  0.70, CH<sub>2</sub>Cl<sub>2</sub>); <sup>1</sup>H NMR (600 MHz, CDCl<sub>3</sub>)  $\delta$  7.47 – 7.45 (m, 2H, Ar-*H*), 7.36 – 7.27 (m, 18H, Ar-*H*), 5.59 (s, 1H, Benzylidene-*H*), 4.99 (d,  $J$  = 10.7 Hz, 1H, OCH<sub>2</sub>Ph), 4.89 (d,  $J$  = 11.4 Hz, 1H, OCH<sub>2</sub>Ph), 4.81 (d,  $J$  = 11.0, 1H, OCH<sub>2</sub>Ph), 4.79 (d,  $J$  = 12.1 Hz, 1H, OCH<sub>2</sub>Ph), 4.65 (d,  $J$  = 12.1 Hz, 1H, OCH<sub>2</sub>Ph), 4.59 (d,  $J$  = 11.3 Hz, 1H, OCH<sub>2</sub>Ph), 4.57 (d,  $J$  = 3.3 Hz, 1H, H-1'), 4.28 (s, 1H, H-1), 4.14 (dd,  $J$  = 10.2, 1.6 Hz, 1H, H-6a'), 4.03 – 3.96 (m, 3H, H-4, H-3', H-6), 3.85 –

3.79 (m, 1H, H-5'), 3.58 (s, 3H, OCH<sub>3</sub>), 3.56 (d,  $J = 3.1$  Hz, 1H, H-2), 3.53 (s, 3H, OCH<sub>3</sub>), 3.51 (dd,  $J = 9.4, 3.5$  Hz, 1H, H-6b'), 3.48 (dd,  $J = 9.7, 3.6$  Hz, 1H, H-2'), 3.41 (t,  $J = 9.5$  Hz, 1H, H-4'), 3.36 (s, 3H, OCH<sub>3</sub>), 3.30 (dd,  $J = 9.9, 3.1$  Hz, 1H, H-3), 2.81 (t,  $J = 9.1$  Hz, 1H, H-5), 1.34 (d,  $J = 6.1$  Hz, 3H, H-7); <sup>13</sup>C NMR (150 MHz, CDCl<sub>3</sub>)  $\delta$  139.9, 139.6, 139.4, 138.9, 130.1, 129.8, 129.8, 129.7, 129.3, 129.4, 129.4, 129.3, 129.2, 129.1, 129.0, 127.4, 103.4 ( $J_{C-H} = 155.4$  Hz, C-1), 102.3, 99.1 ( $J_{C-H} = 168.3$  Hz, C-1'), 83.5, 81.2, 81.2, 79.9, 79.1, 79.0, 77.2, 76.4, 76.1, 74.7, 74.6, 70.9, 69.9, 63.3, 60.1, 56.3, 19.1; HRMS (ESI)  $m/z$  calcd for C<sub>44</sub>H<sub>52</sub>O<sub>11</sub>Na [M+Na]<sup>+</sup>, 779.3407; found, 779.3421.

**48 $\alpha$** :  $R_f = 0.50$  (hexane/EtOAc 6:4);  $[\alpha]_D^{22} = +75.3$  ( $c$  0.15, CH<sub>2</sub>Cl<sub>2</sub>); <sup>1</sup>H NMR (600 MHz, CDCl<sub>3</sub>)  $\delta$  7.45 – 7.43 (m, 2H), 7.38 – 7.23 (m, 18H), 5.62 (s, 1H), 5.00 (d,  $J = 10.7$  Hz, 1H), 4.96 (d,  $J = 11.0$  Hz, 1H), 4.92 (s, 1H), 4.82 (d,  $J = 10.5$  Hz, 1H), 4.79 (d,  $J = 12.2$  Hz, 1H), 4.67 (d,  $J = 12.1$  Hz, 1H), 4.62 (d,  $J = 11.0$  Hz, 1H), 4.60 (d,  $J = 3.5$  Hz, 1H), 4.04 – 4.00 (m, 2H), 3.87 – 3.97 (m, 1H), 3.80 – 3.75 (m, 2H), 3.64 – 3.62 (m, 3H), 3.53 (dd,  $J = 7.7, 3.6$  Hz, 1H), 3.52 (s, 3H), 3.52 – 3.51 (m, 1H), 3.49 (s, 3H), 3.38 (s, 3H), 3.34 (t,  $J = 9.2$  Hz, 1H), 1.26 (d,  $J = 6.2$  Hz, 3H); <sup>13</sup>C NMR (150 MHz, CDCl<sub>3</sub>)  $\delta$  138.5, 138.0, 137.9, 137.8, 128.7, 128.5, 128.4, 128.1, 128.0, 128.0, 127.9, 127.8, 127.7, 127.6, 126.2, 101.1, 98.4 ( $J_{C-H} = 167.5$  Hz, C-1), 97.9 ( $J_{C-H} = 167.6$  Hz, C-1'), 82.1, 80.0, 78.4, 78.2, 77.8, 77.6, 75.9, 75.2, 75.0, 73.3, 69.9, 69.6, 66.0, 59.6, 59.0, 55.1, 17.6; HRMS (ESI)  $m/z$  calcd for C<sub>44</sub>H<sub>52</sub>O<sub>11</sub>Na [M+Na]<sup>+</sup>, 779.3407; found, 779.3407.

**Phenyl 4,6-*O*-benzylidene-7-deoxy-2,3-di-*O*-methyl-D-glycero- $\beta$ -D-mannohetpopyranosyl-(1 $\rightarrow$ 4)-2',3',6'-tri-*O*-benzyl- $\alpha$ -D-glucopyranoside (49 $\beta$ )**

Coupling of **34** with **37** following the general procedure afforded **49 $\beta$**  in 80% yield (Repetition: Yield = 78%;  $\beta$  only).  $R_f = 0.40$  (hexane/EtOAc 6:4);  $[\alpha]_D^{22} = +19.4$  ( $c$  1.85, CH<sub>2</sub>Cl<sub>2</sub>); <sup>1</sup>H NMR (400 MHz, CDCl<sub>3</sub>)  $\delta$  7.50 – 7.22 (m, 20H, Ar-*H*), 5.52 (s, 1H, Benzylidene-*H*), 5.04 (d,  $J = 11.0$  Hz, 1H, OCH<sub>2</sub>Ph), 4.84 (d,  $J = 12.2$  Hz, 1H, OCH<sub>2</sub>Ph), 4.81 (d,  $J = 11.2$  Hz, 1H, OCH<sub>2</sub>Ph), 4.73 (d,  $J = 12.1$  Hz, 1H, OCH<sub>2</sub>Ph), 4.67 (d,  $J = 12.2$  Hz, 1H, OCH<sub>2</sub>Ph), 4.63 (d,  $J = 3.7$  Hz, 1H, H-1'), 4.46 (d,  $J = 12.1$  Hz, 1H, OCH<sub>2</sub>Ph), 4.39 (s, 1H, H-1), 3.92 – 3.90 (m, 2H, H-3', H-4'), 3.87 (d,  $J = 9.8$  Hz, 1H, H-4), 3.80 – 3.77 (m, 1H, H-5'), 3.73 (dd,  $J = 10.7, 2.9$  Hz, 1H, H-6a'), 3.67 (d,  $J = 10.7, 1.9$  Hz, 1H, H-6b'), 3.57 (s, 3H, OCH<sub>3</sub>), 3.55 – 3.54 (m, 1H, H-6), 3.53 (dd,  $J = 9.3, 3.4$  Hz, 1H, H-2'), 3.48 (s, 3H, OCH<sub>3</sub>), 3.44 (d,  $J = 3.4$  Hz, 1H, H-2), 3.40 (s, 3H, OCH<sub>3</sub>), 3.06 (dd,  $J = 9.9, 3.1$  Hz, 1H, H-3), 2.64 (t,  $J = 9.1$  Hz, 1H, H-5), 1.19 (d,  $J = 6.1$  Hz, 3H, H-7); <sup>13</sup>C

NMR (100 MHz, CDCl<sub>3</sub>)  $\delta$  139.6, 138.3, 137.8, 137.6, 128.7, 128.6, 128.4, 128.1, 128.0, 128.0, 127.8, 127.7, 127.2, 126.2, 101.0, 100.7 ( $J_{C-H}$  = 157.2 Hz, C-1), 98.5 ( $J_{C-H}$  = 167.8 Hz, C-1'), 79.9, 79.7, 79.1, 78.6, 77.8, 76.3, 75.2, 74.8, 73.7, 73.6, 73.1, 69.6, 68.4, 61.6, 58.6, 55.3, 17.8; HRMS (ESI)  $m/z$  calcd for C<sub>44</sub>H<sub>52</sub>O<sub>11</sub>Na [M+Na]<sup>+</sup>, 779.3407; found, 779.3411.

**(1-Adamantanyl) 4,6-*O*-benzylidene-7-deoxy-2,3-di-*O*-methyl-D-glycero- $\beta$ -D-mannohetpopyranoside (50 $\beta$ ) and (1-Adamantanyl) 4,6-*O*-benzylidene-7-deoxy-2,3-di-*O*-methyl-D-glycero- $\alpha$ -D-mannohetpopyranoside (50 $\alpha$ )**

Coupling of **34** with **38** following the general procedure afforded **50 $\beta$**  and  **$\alpha$**  in 90% yield in 4.0:1 ratio (Repetition: Yield = 86%; 3.6:1 =  $\beta$ : $\alpha$ ). **50 $\beta$** :  $R_f$  = 0.80 (hexane/EtOAc 8:2);  $[\alpha]_D^{22}$  = -26.9 ( $c$  1.05, CH<sub>2</sub>Cl<sub>2</sub>); <sup>1</sup>H NMR (400 MHz, CDCl<sub>3</sub>)  $\delta$  7.52 – 7.45 (m, 2H, Ar-*H*), 7.41 – 7.29 (m, 3H, Ar-*H*), 5.61 (s, 1H, Benzylidene-*H*), 4.76 (s, 1H, H-1), 4.02 (t,  $J$  = 9.7 Hz, 1H, H-4), 3.99 – 3.95 (m, 1H, H-6), 3.68 (s, 3H, OCH<sub>3</sub>), 3.57 (d,  $J$  = 3.4 Hz, 1H, H-2), 3.55 (s, 3H, OCH<sub>3</sub>), 3.39 (dd,  $J$  = 9.7, 2.9 Hz, 1H, H-3), 2.87 (t,  $J$  = 9.1 Hz, 1H, H-5), 2.17 (br s, 3H, Ada-*H*), 1.81 (m, 6H, Ada-*H*), 1.70 – 1.56 (m, 6H, Ada-*H*), 1.37 (d,  $J$  = 6.1 Hz, 3H, H-7); <sup>13</sup>C NMR (100 MHz, CDCl<sub>3</sub>)  $\delta$  137.8, 128.7, 128.1, 126.2, 101.0, 94.9 ( $J_{C-H}$  = 153.4 Hz, C-1), 80.5, 80.3, 77.8, 75.1, 75.0, 73.1, 62.3, 58.7, 42.4, 36.2, 30.6, 17.9; HRMS (ESI)  $m/z$  calcd for C<sub>26</sub>H<sub>36</sub>O<sub>6</sub>Na [M+Na]<sup>+</sup>, 467.2410; found, 467.2414.

**50 $\alpha$** :  $R_f$  = 0.85 (hexane/EtOAc 8:2);  $[\alpha]_D^{22}$  = +53.0 ( $c$  0.20, CH<sub>2</sub>Cl<sub>2</sub>); <sup>1</sup>H NMR (400 MHz, CDCl<sub>3</sub>)  $\delta$  7.53 – 7.48 (m, 2H, Ar-*H*), 7.38 – 7.30 (m, 3H Ar-*H*), 5.66 (s, 1H, Benzylidene-*H*), 5.31 (d,  $J$  = 1.6 Hz, 1H, H-1), 4.03 (t,  $J$  = 9.7 Hz, 1H, H-4), 3.94 – 3.90 (m, 1H, H-6), 3.76 (dd,  $J$  = 10.0, 3.2 Hz, 1H, H-3), 3.59 (t,  $J$  = 9.3 Hz, 1H, H-5), 3.57 (s, 3H, OCH<sub>3</sub>), 3.54 (s, 3H, OCH<sub>3</sub>), 3.47 (dd,  $J$  = 3.1, 1.7 Hz, 1H, H-2), 2.15 (br s, 3H, Ada-*H*), 1.86 – 1.78 (m, 6H, Ada-*H*), 1.74 – 1.57 (m, 6H, Ada-*H*), 1.34 (d,  $J$  = 6.2 Hz, 3H, H-7); <sup>13</sup>C NMR (100 MHz, CDCl<sub>3</sub>)  $\delta$  137.9, 128.6, 128.1, 126.2, 101.0, 91.2 ( $J_{C-H}$  = 165.8 Hz, C-1), 80.4, 78.8, 77.5, 75.7, 74.9, 69.6, 59.6, 59.0, 45.3, 42.5, 36.2, 30.6, 18.1; HRMS (ESI)  $m/z$  calcd for C<sub>26</sub>H<sub>36</sub>O<sub>6</sub>Na [M+Na]<sup>+</sup>, 467.2410; found, 467.2429.

<sup>1</sup>H NMR (400 MHz, CDCl<sub>3</sub>) of Phenyl 4,6-*O*-*p*-methoxybenzylidene-2,3-di-*O*-methyl-1-thio- $\alpha$ -D-mannopyranoside (4)

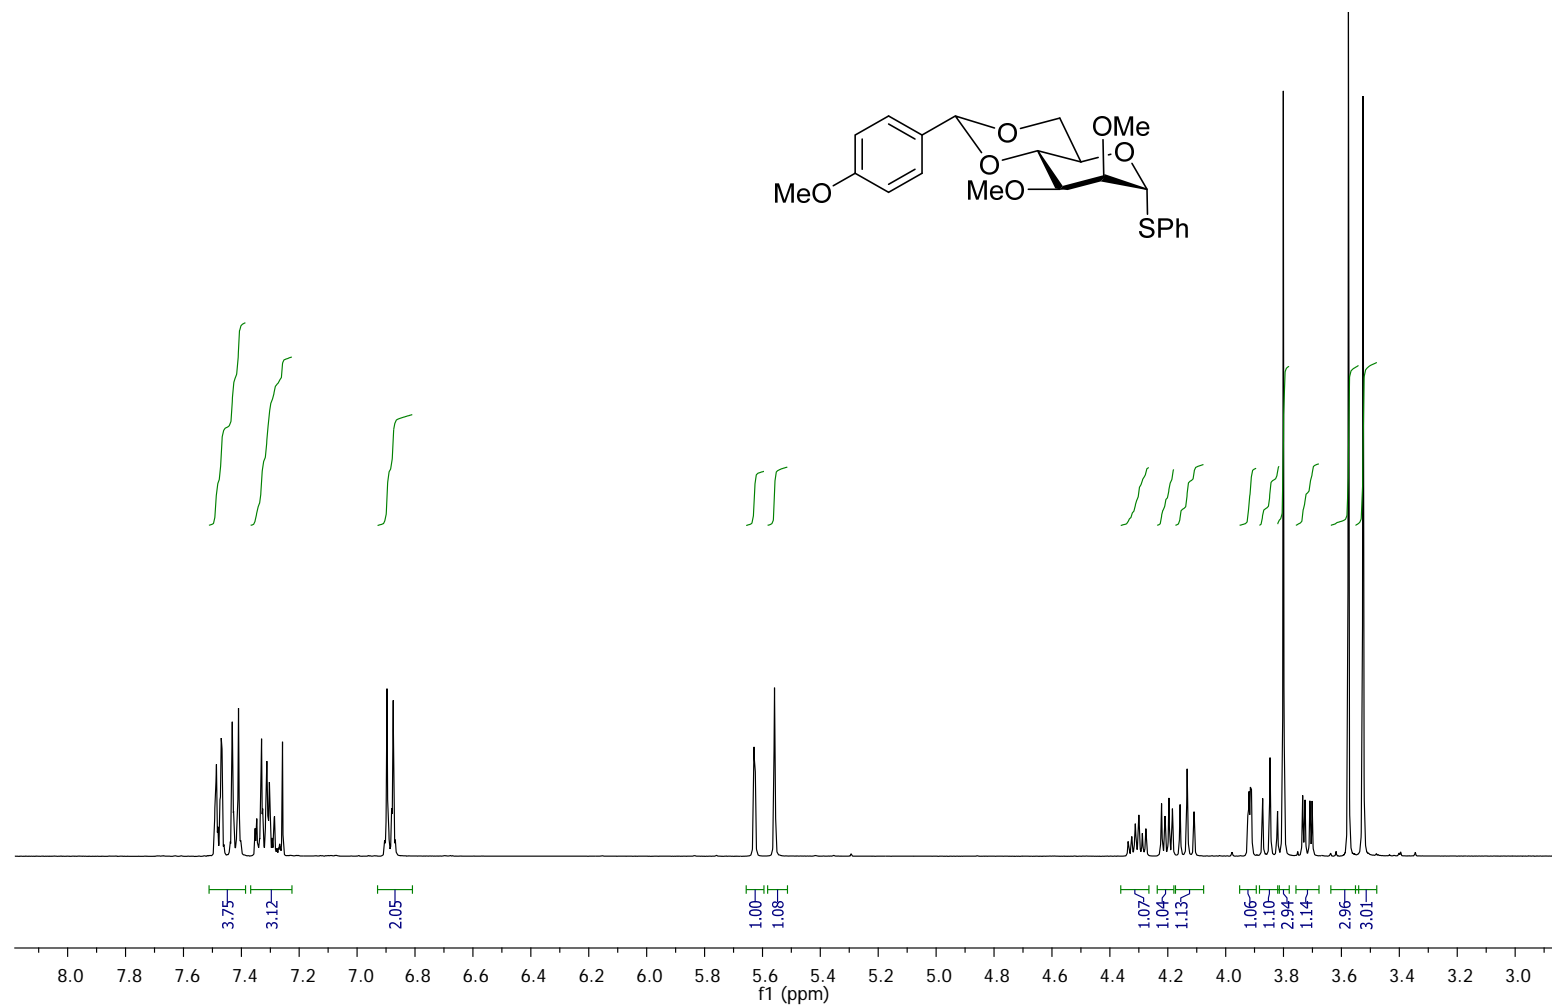

<sup>13</sup>C NMR (100 MHz, CDCl<sub>3</sub>) of Phenyl 4,6-*O*-*p*-methoxybenzylidene-2,3-di-*O*-methyl-1-thio- $\alpha$ -D-mannopyranoside (4)

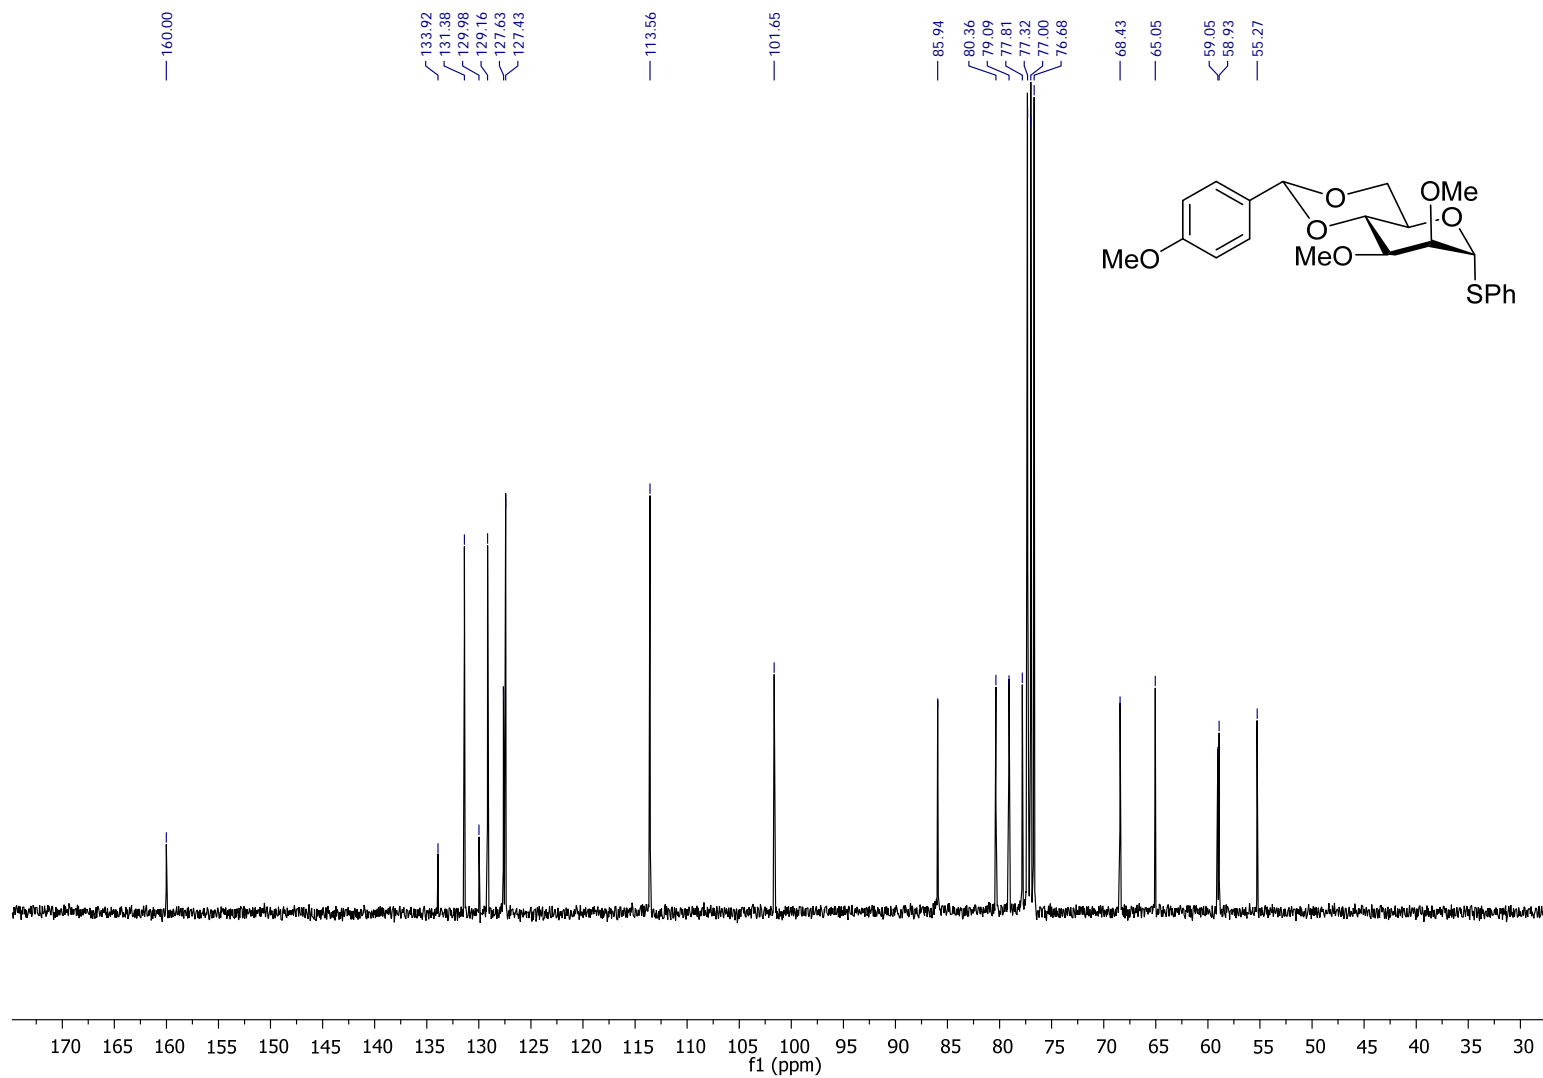

<sup>1</sup>H NMR (600 MHz, CDCl<sub>3</sub>) Phenyl 4-*O*-benzyl-2,3-di-*O*-methyl-1-deoxy-1-thio- $\alpha$ -D-mannopyranoside (5)

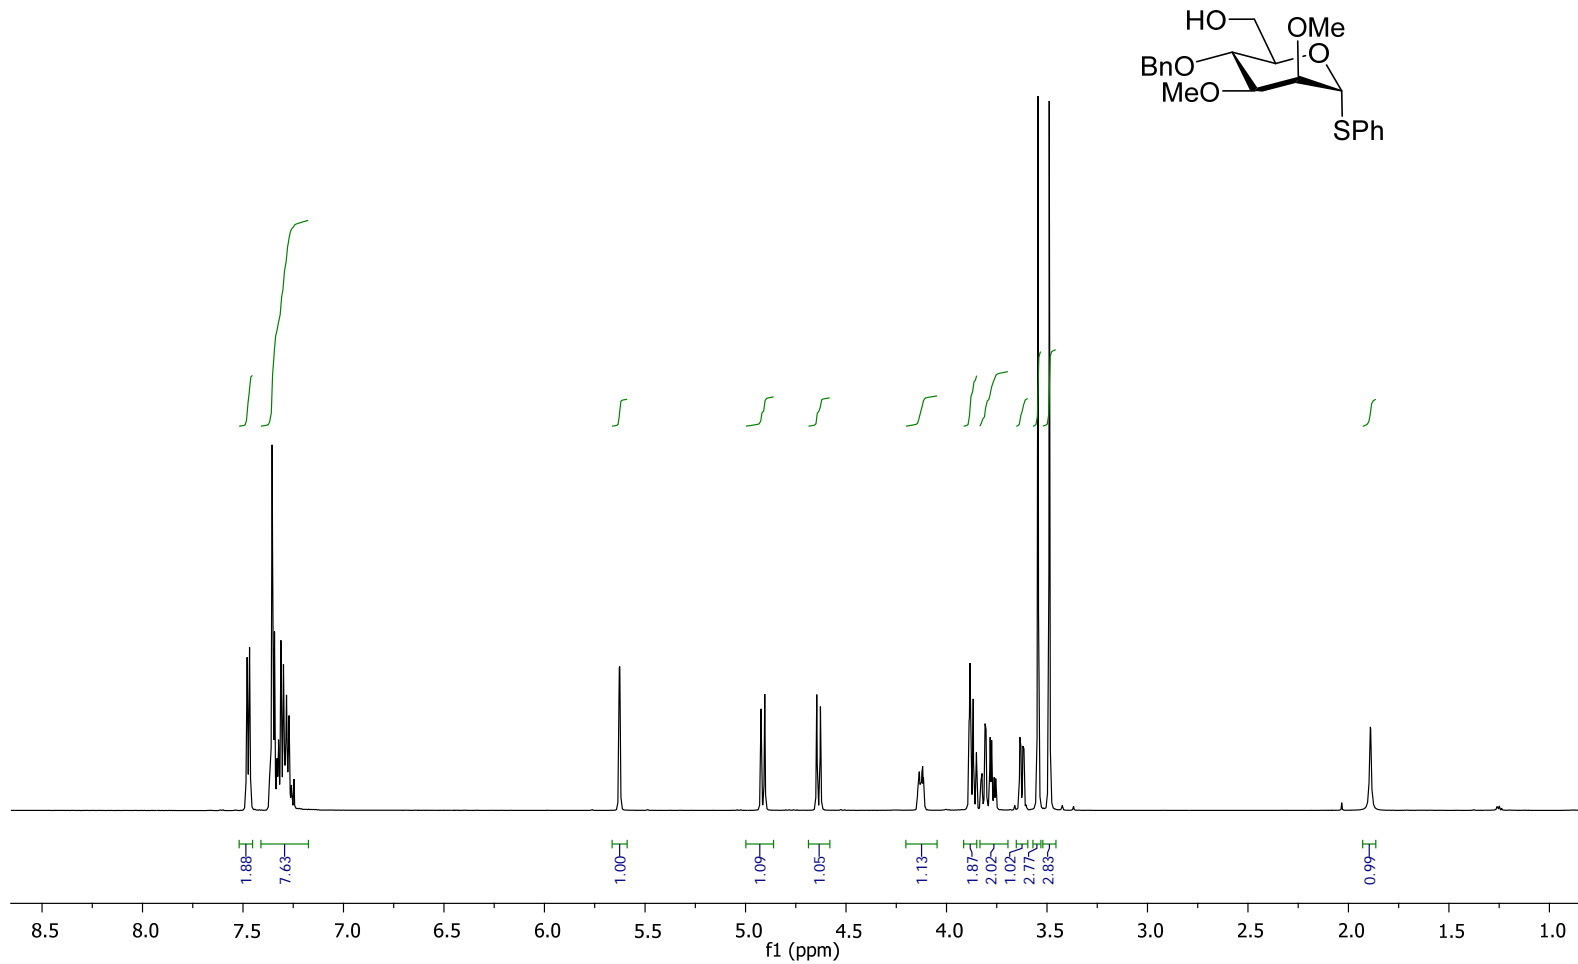

**$^{13}\text{C}$  NMR (150 MHz,  $\text{CDCl}_3$ ) of Phenyl 4-*O*-benzyl-2,3-di-*O*-methyl-1-thio- $\alpha$ -D-mannopyranoside (5)**

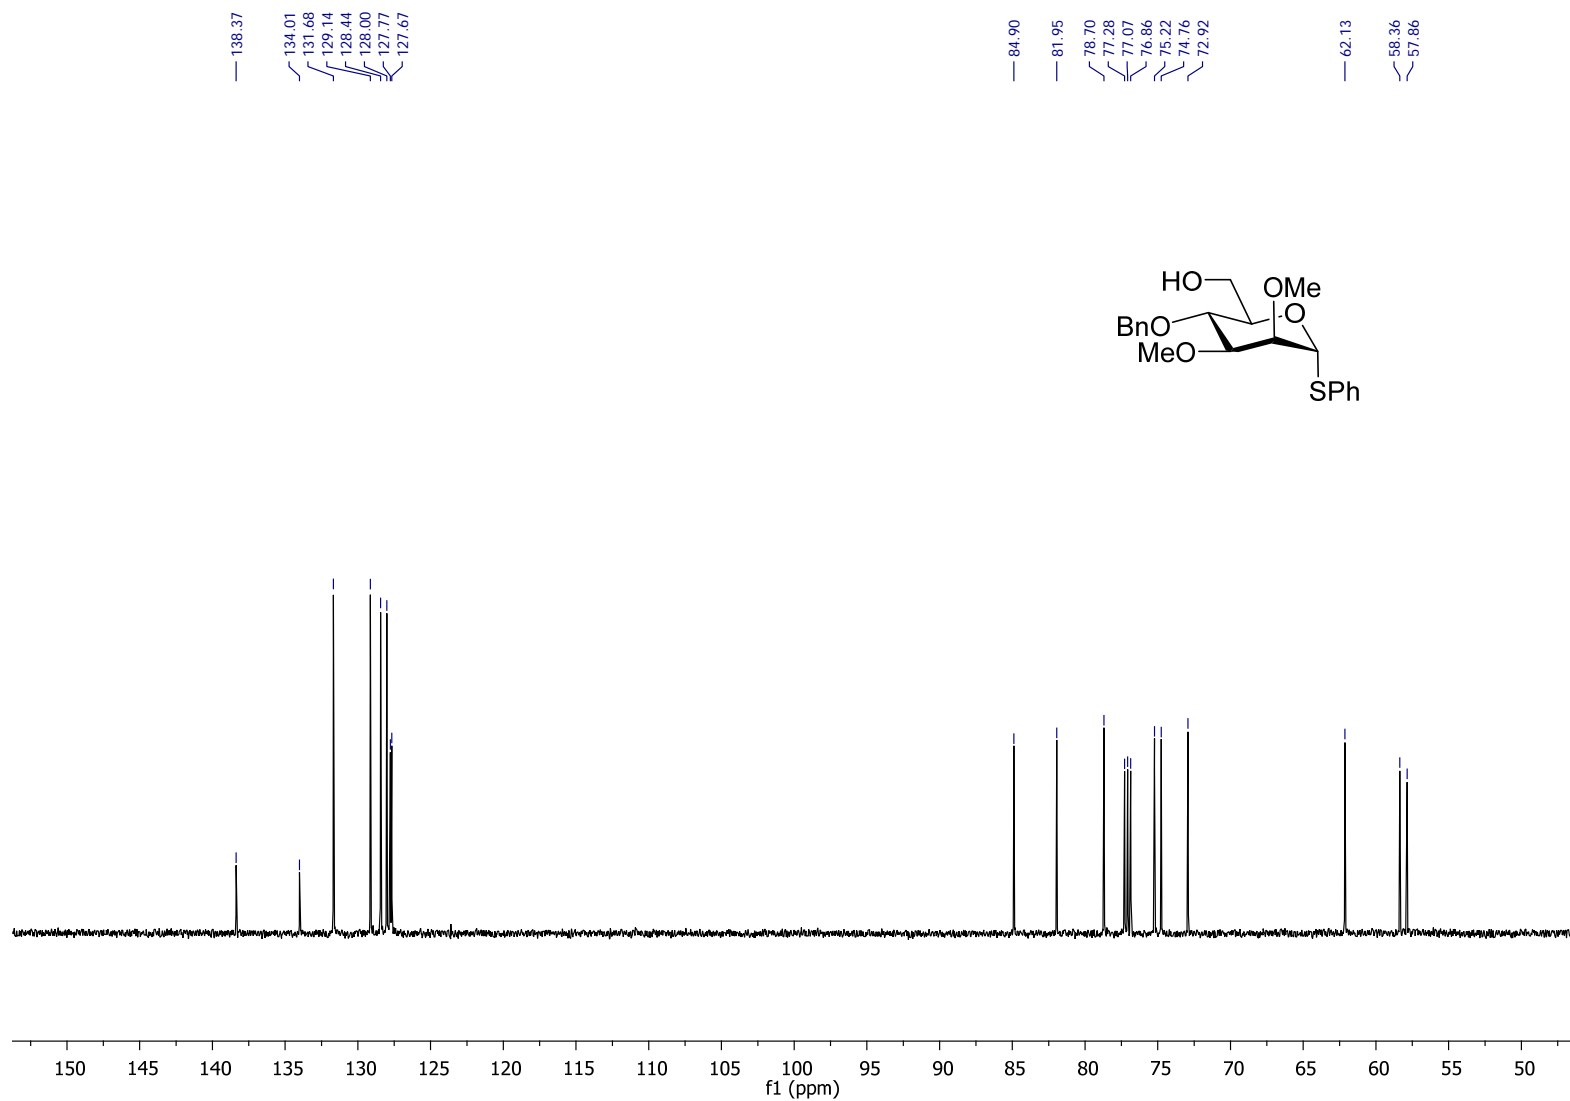



**<sup>1</sup>H NMR (400 MHz, CDCl<sub>3</sub>) of Phenyl 4-*O*-*p*-methoxybenzyl-2,3-di-*O*-methyl-1-thio- $\alpha$ -D-mannopyranoside (6)**

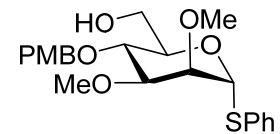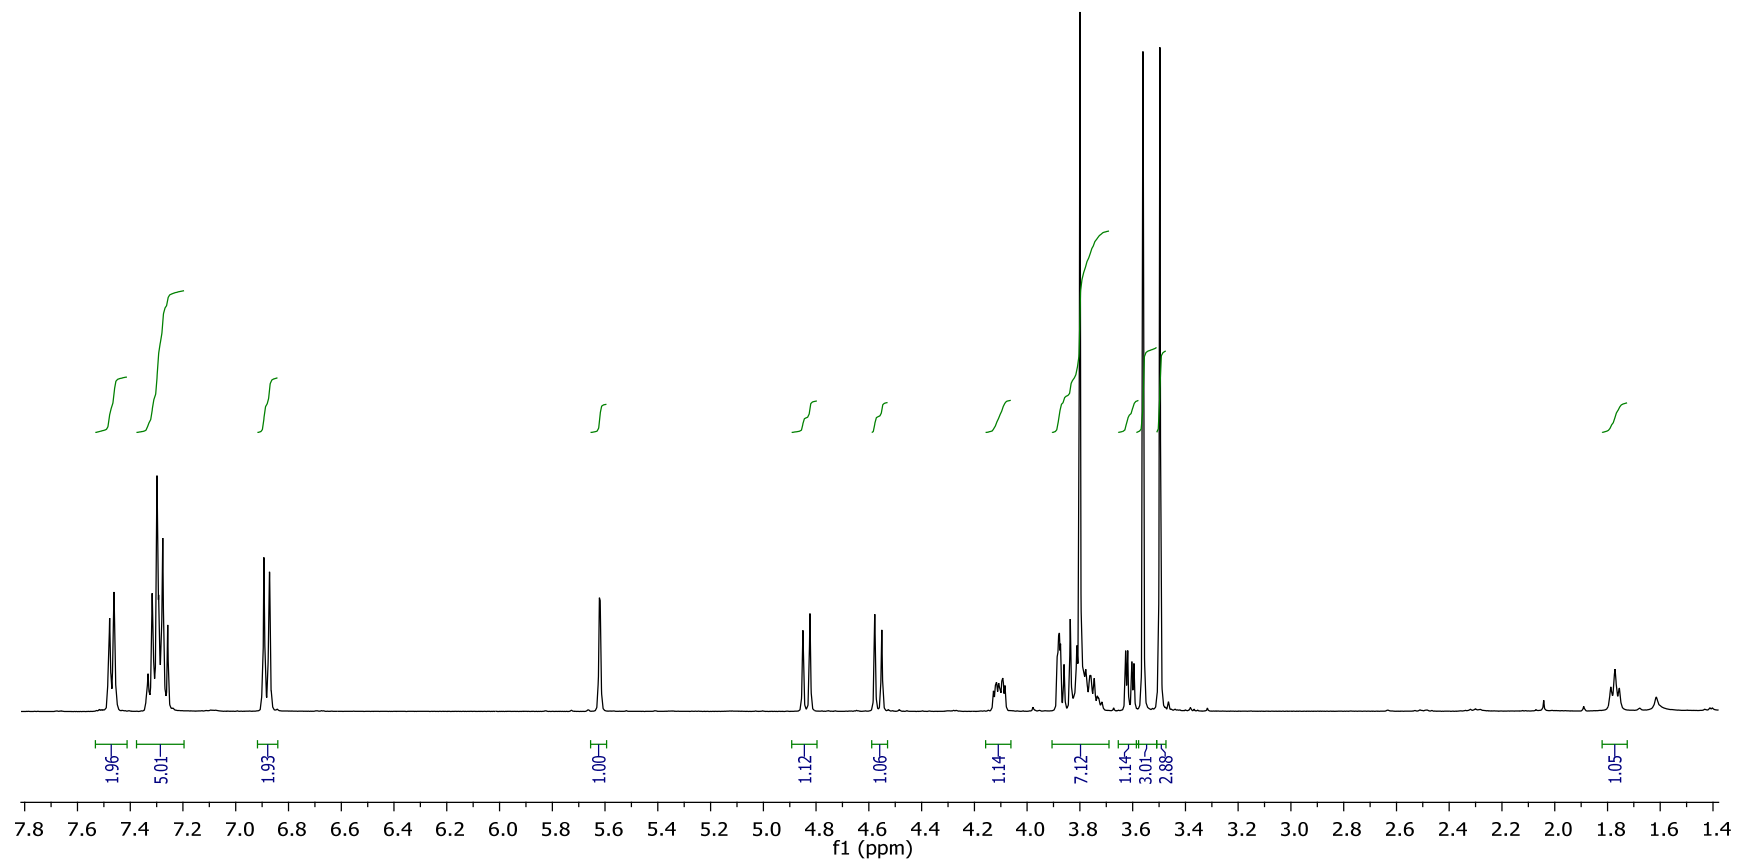

**<sup>13</sup>C NMR (100 MHz, CDCl<sub>3</sub>) of Phenyl 4-*O*-*p*-methoxybenzyl-2,3-di-*O*-methyl-1-thio- $\alpha$ -D-mannopyranoside (6)**

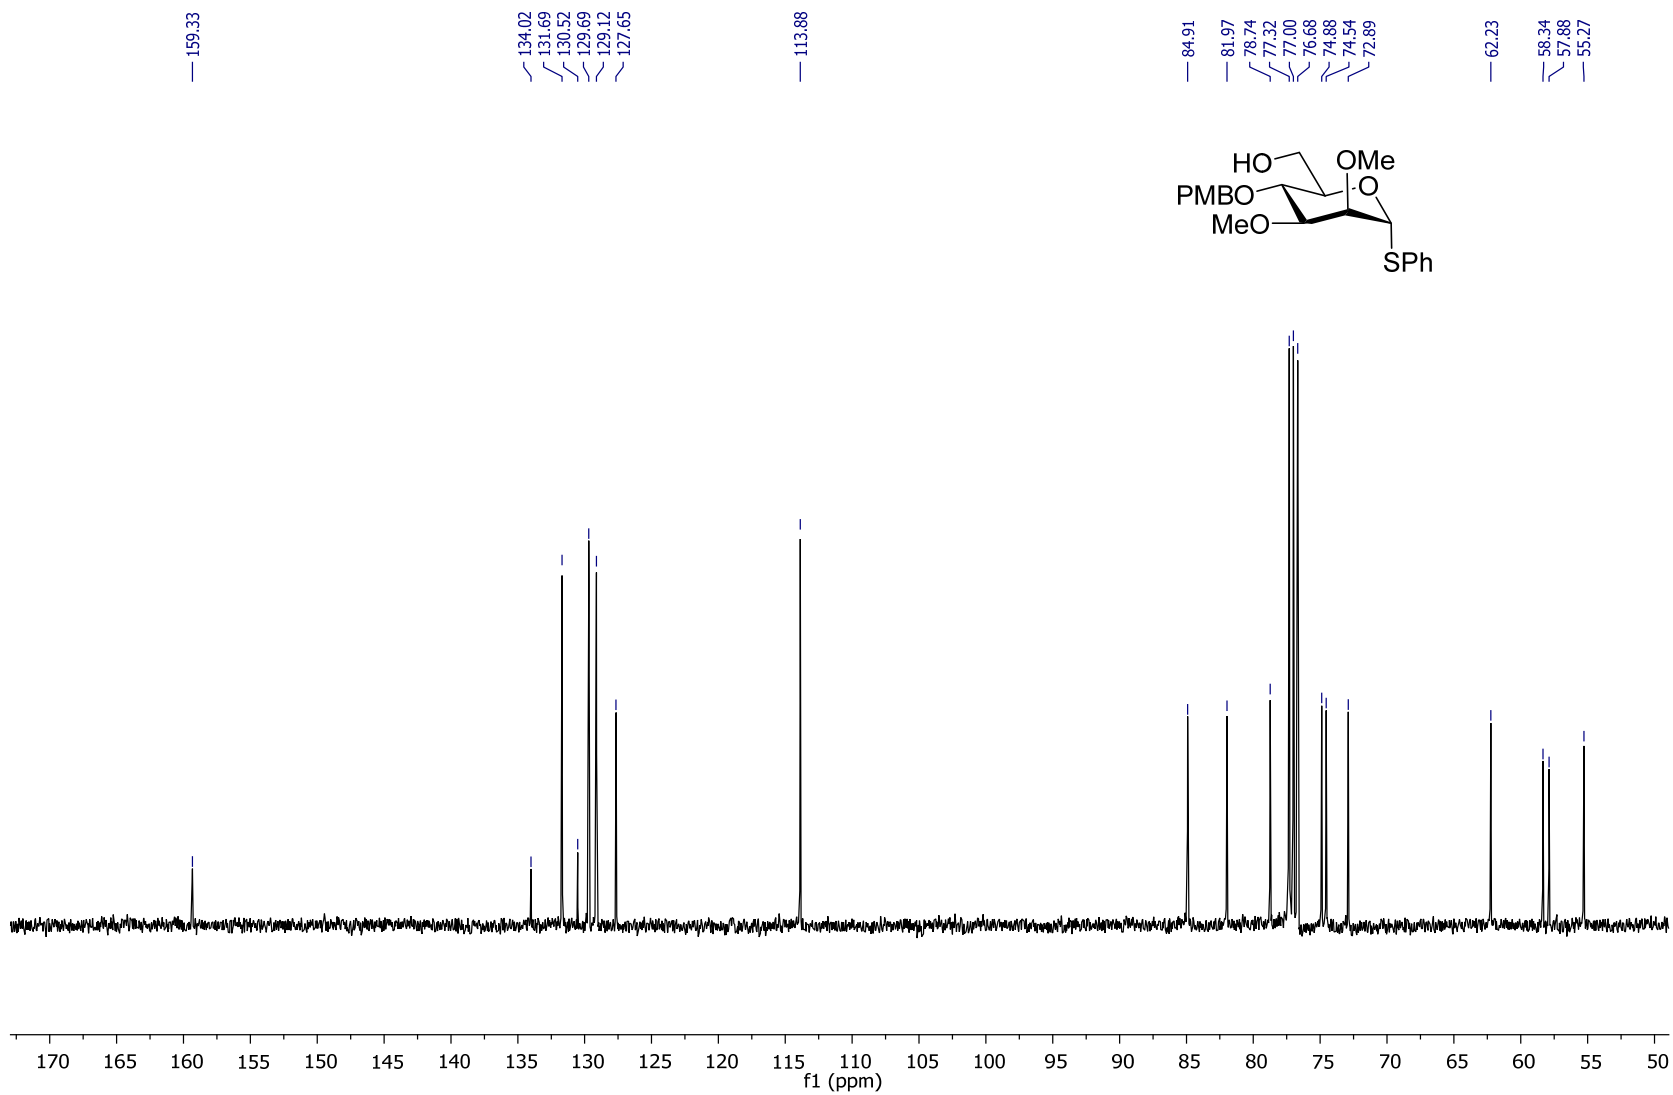

<sup>1</sup>H NMR (400 MHz, CDCl<sub>3</sub>) of (6*R*) Phenyl 6-*C*-Allyl-4-*O*-benzyl-2,3-di-*O*-methyl-1-thio- $\alpha$ -D-mannopyranoside (7)

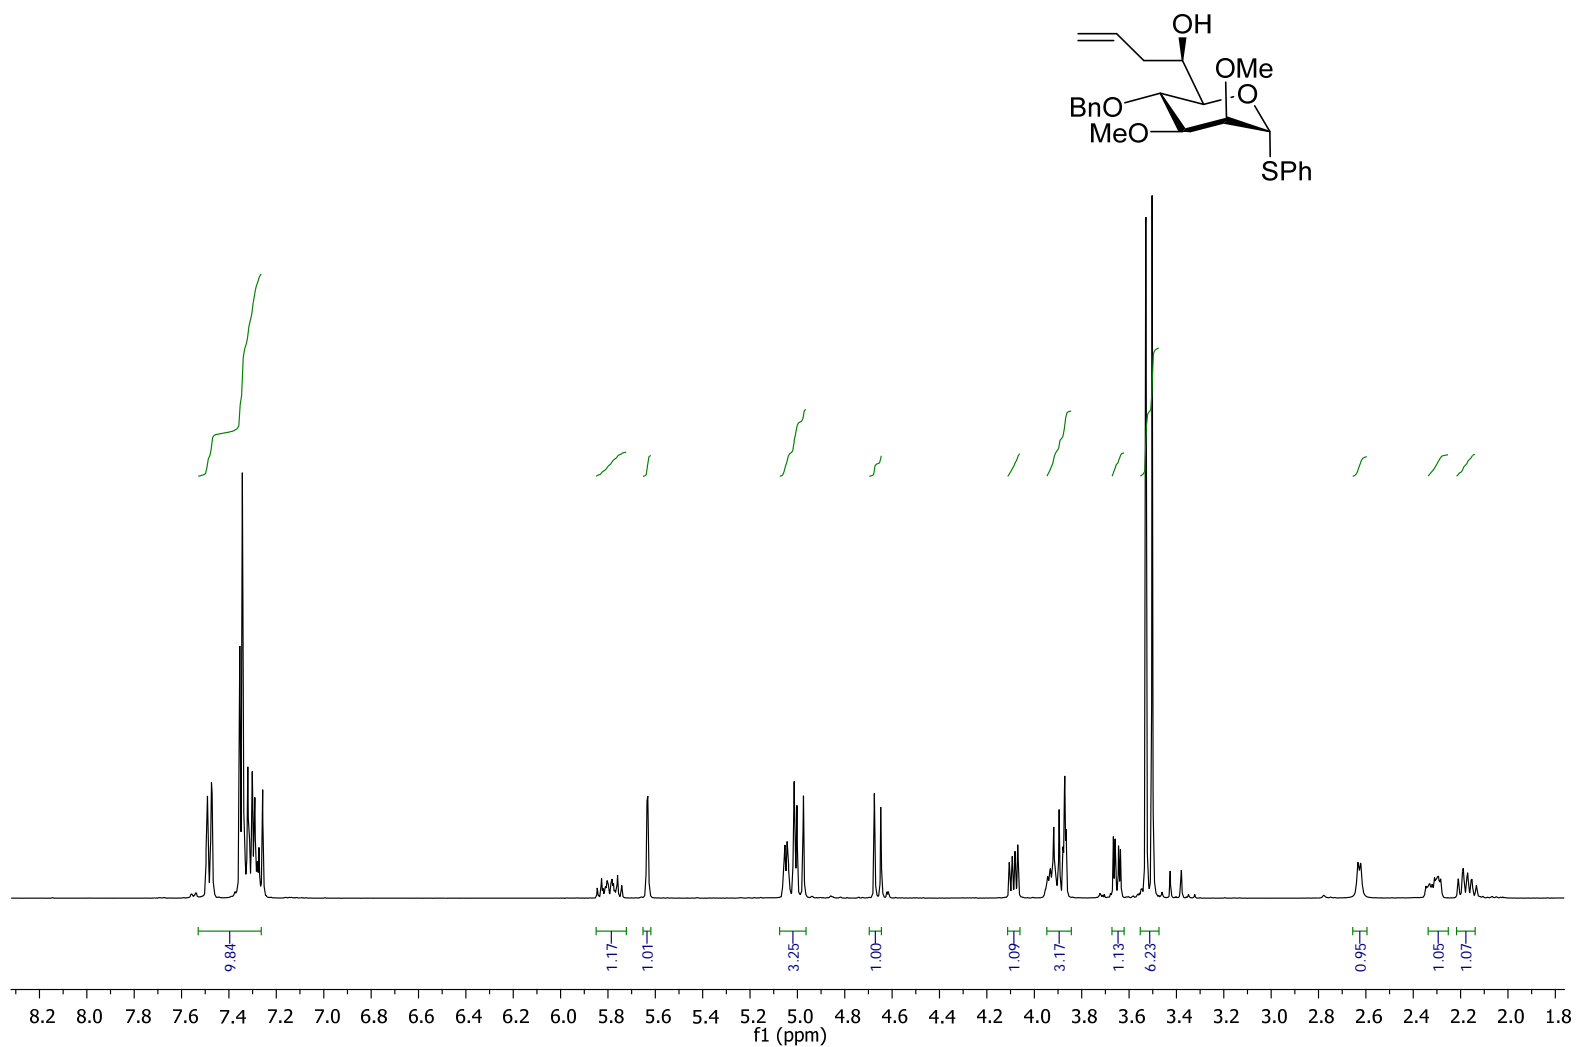

<sup>13</sup>C NMR (100 MHz, CDCl<sub>3</sub>) of (6*R*) Phenyl 6-*C*-Allyl-4-*O*-benzyl-2,3-di-*O*-methyl-1-thio- $\alpha$ -D-mannopyranoside (7)

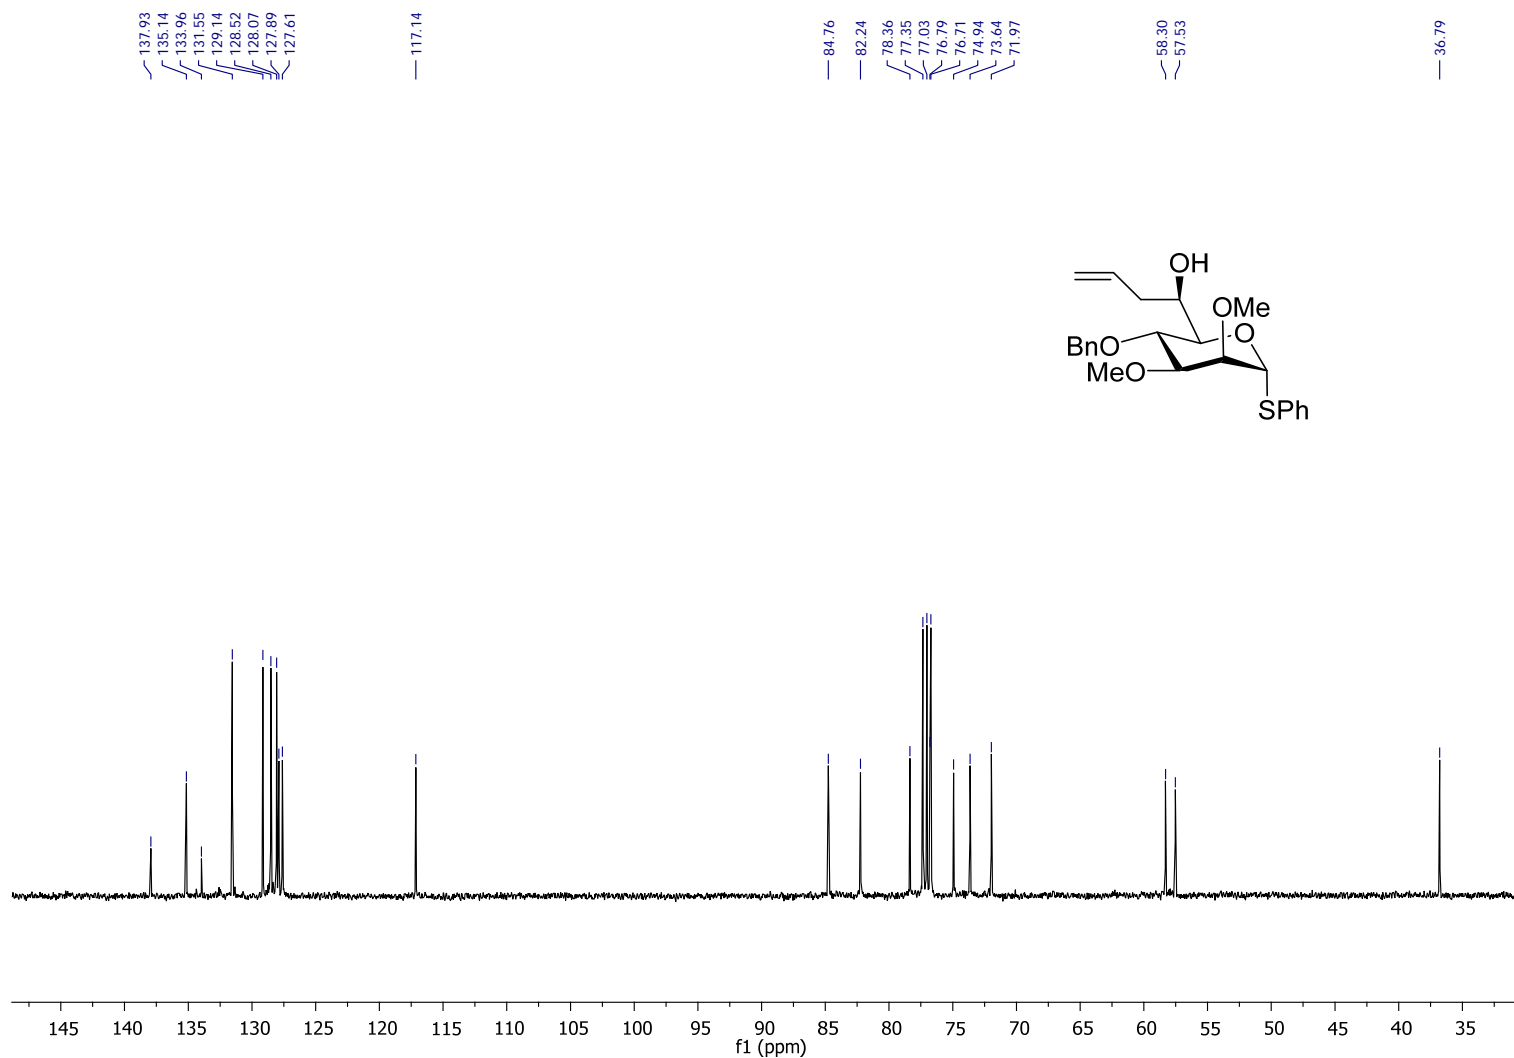

<sup>1</sup>H NMR (400 MHz, CDCl<sub>3</sub>) of (6*R*) Phenyl 6-*C*-Allyl-4-*O*-*p*-methoxybenzyl-2,3-di-*O*-methyl-1-thio- $\alpha$ -D-mannopyranoside (8)

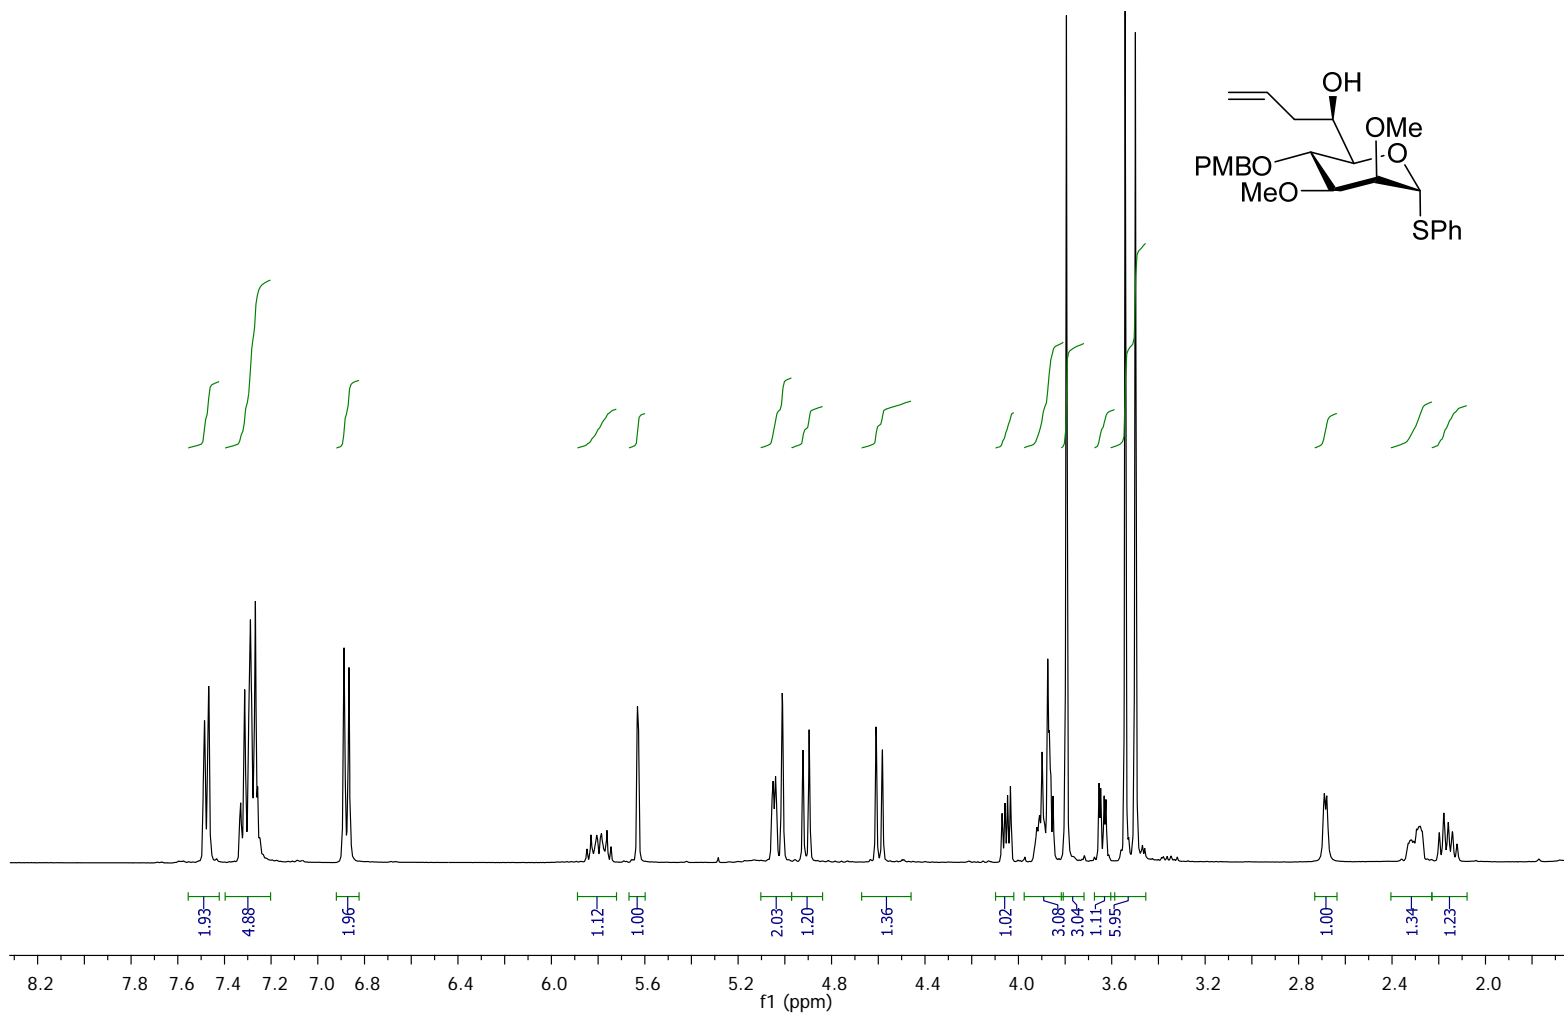

<sup>13</sup>C NMR (100 MHz, CDCl<sub>3</sub>) of (6*R*) Phenyl 6-*C*-Allyl-4-*O*-*p*-methoxybenzyl-2,3-di-*O*-methyl-1-thio- $\alpha$ -D-mannopyranoside (8)

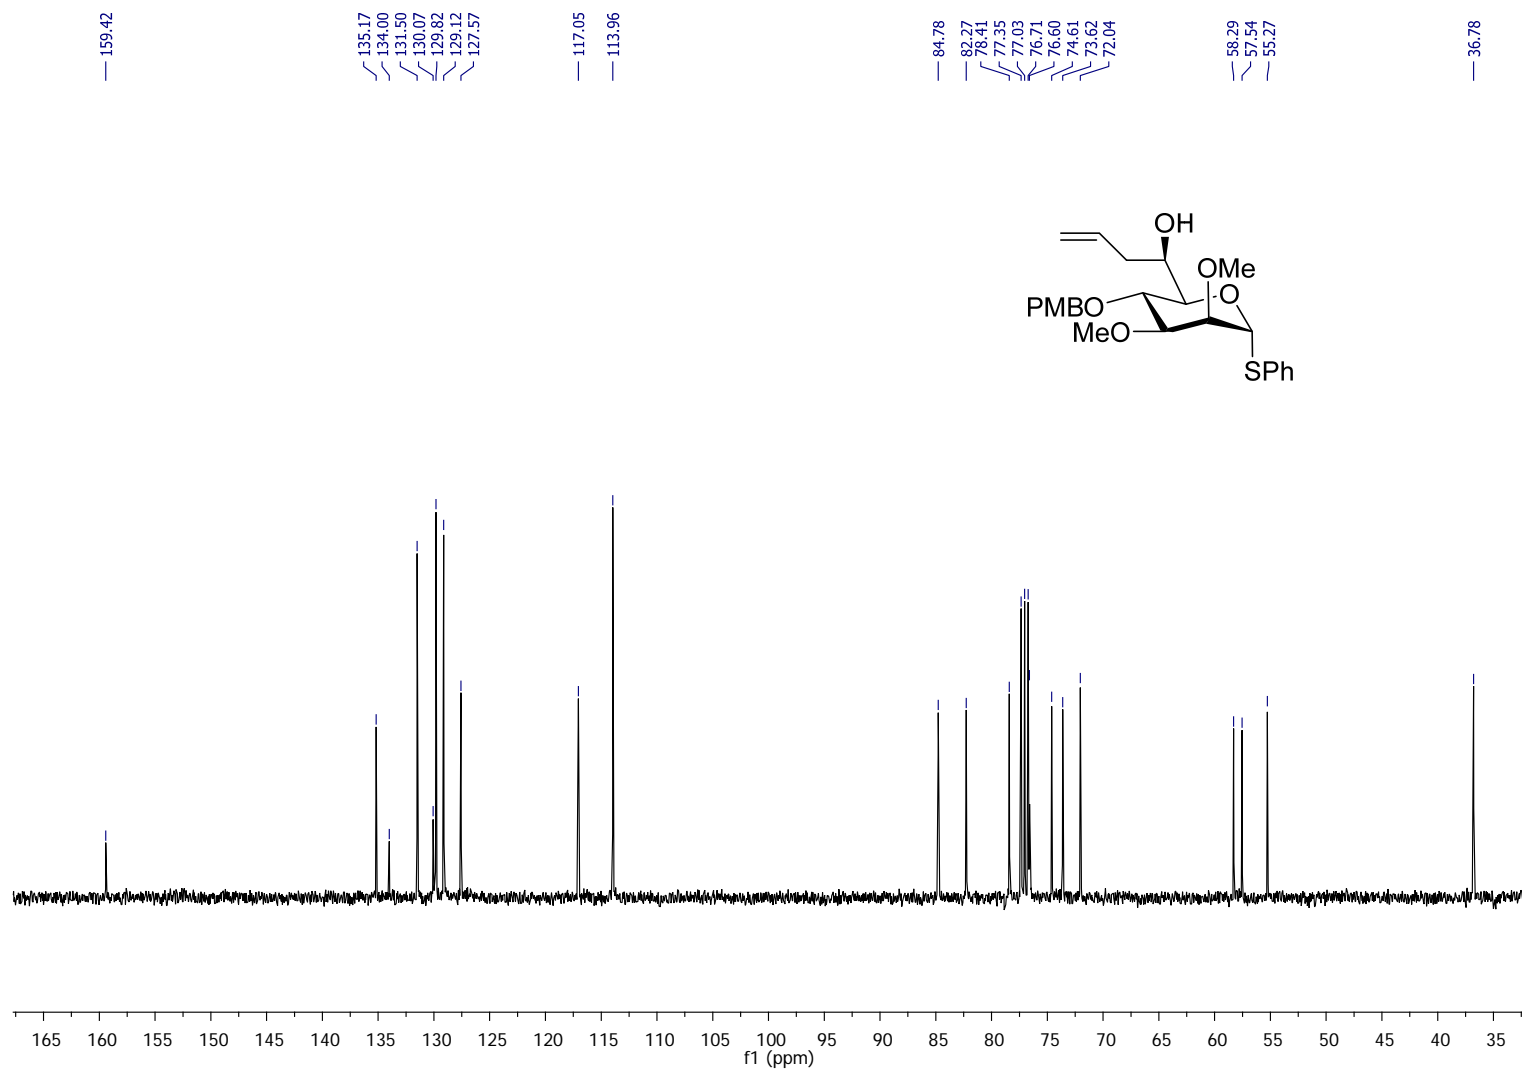

**$^1\text{H}$  NMR (400 MHz,  $\text{CDCl}_3$ ) of (6*S*) Phenyl 6-*C*-Allyl-4-*O*-benzyl-2,3-di-*O*-methyl-1-thio- $\alpha$ -*D*-mannopyranoside (9)**

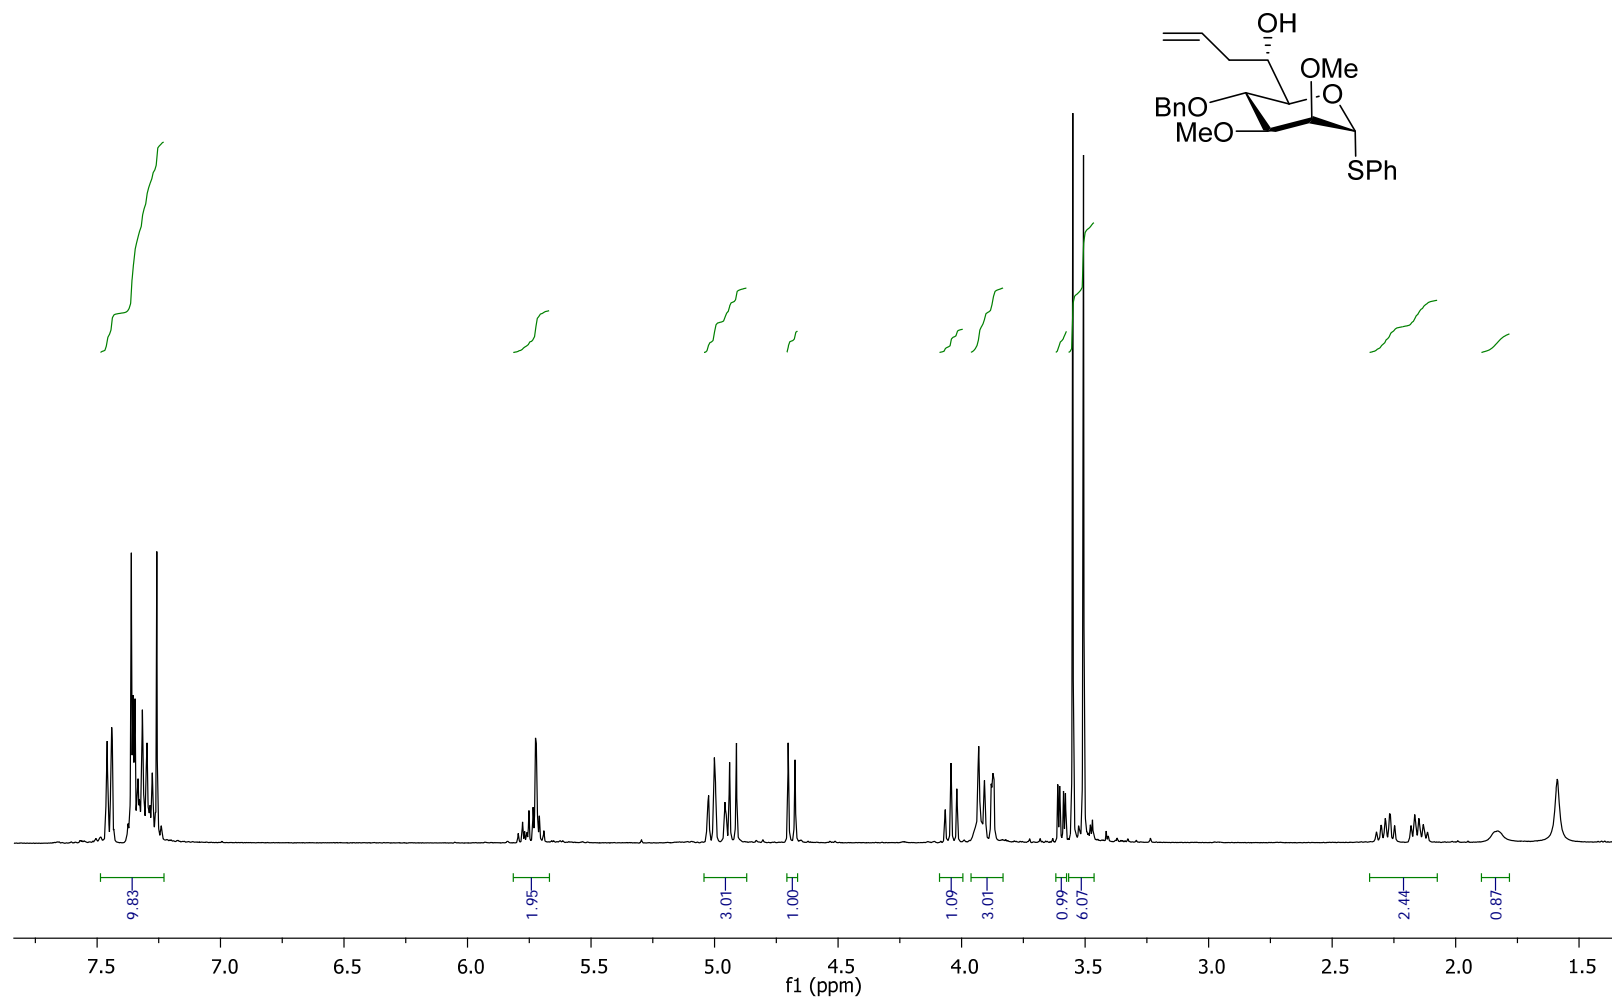

**<sup>13</sup>C NMR (100 MHz, CDCl<sub>3</sub>) of (6*S*) Phenyl 6-*C*-Allyl-4-*O*-benzyl-2,3-di-*O*-methyl-1-thio- $\alpha$ -D-mannopyranoside (9)**

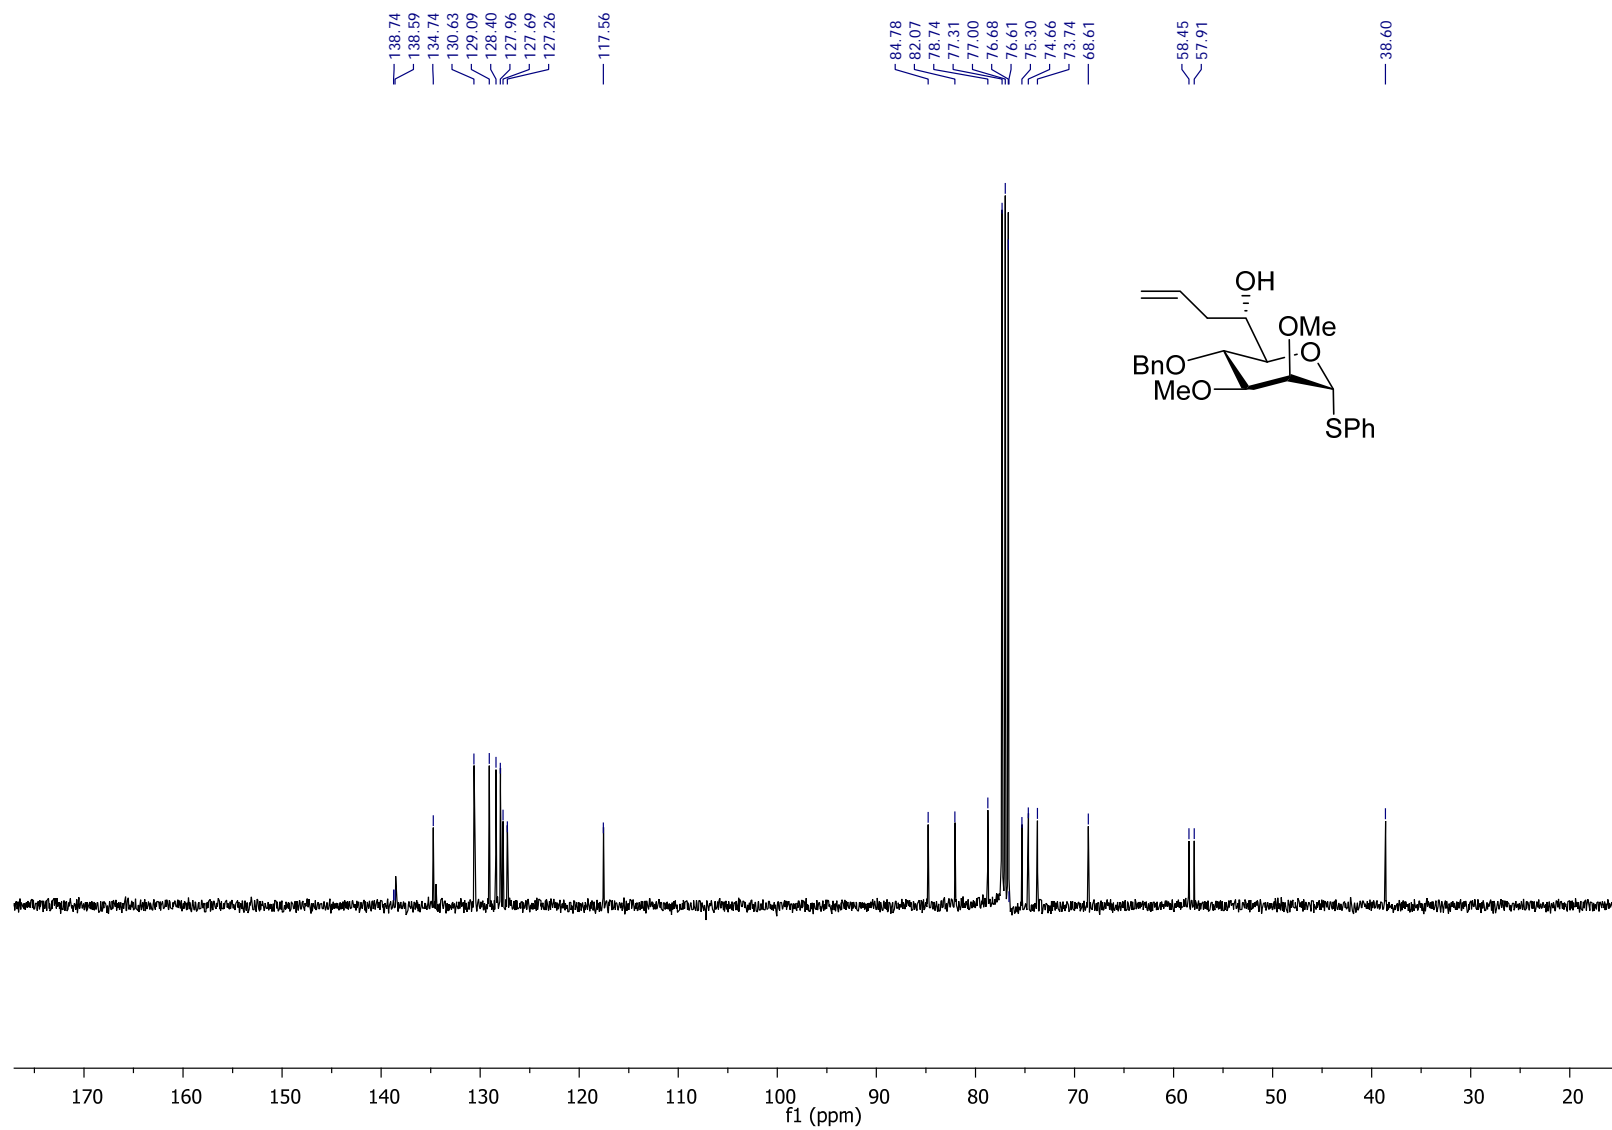



$^1\text{H}$  NMR (400 MHz,  $\text{CDCl}_3$ ) of (6*S*) Phenyl 6-*C*-Allyl-4-*O*-*p*-methoxybenzyl-2,3-di-*O*-methyl-1-thio- $\alpha$ -*D*-mannopyranoside (10)

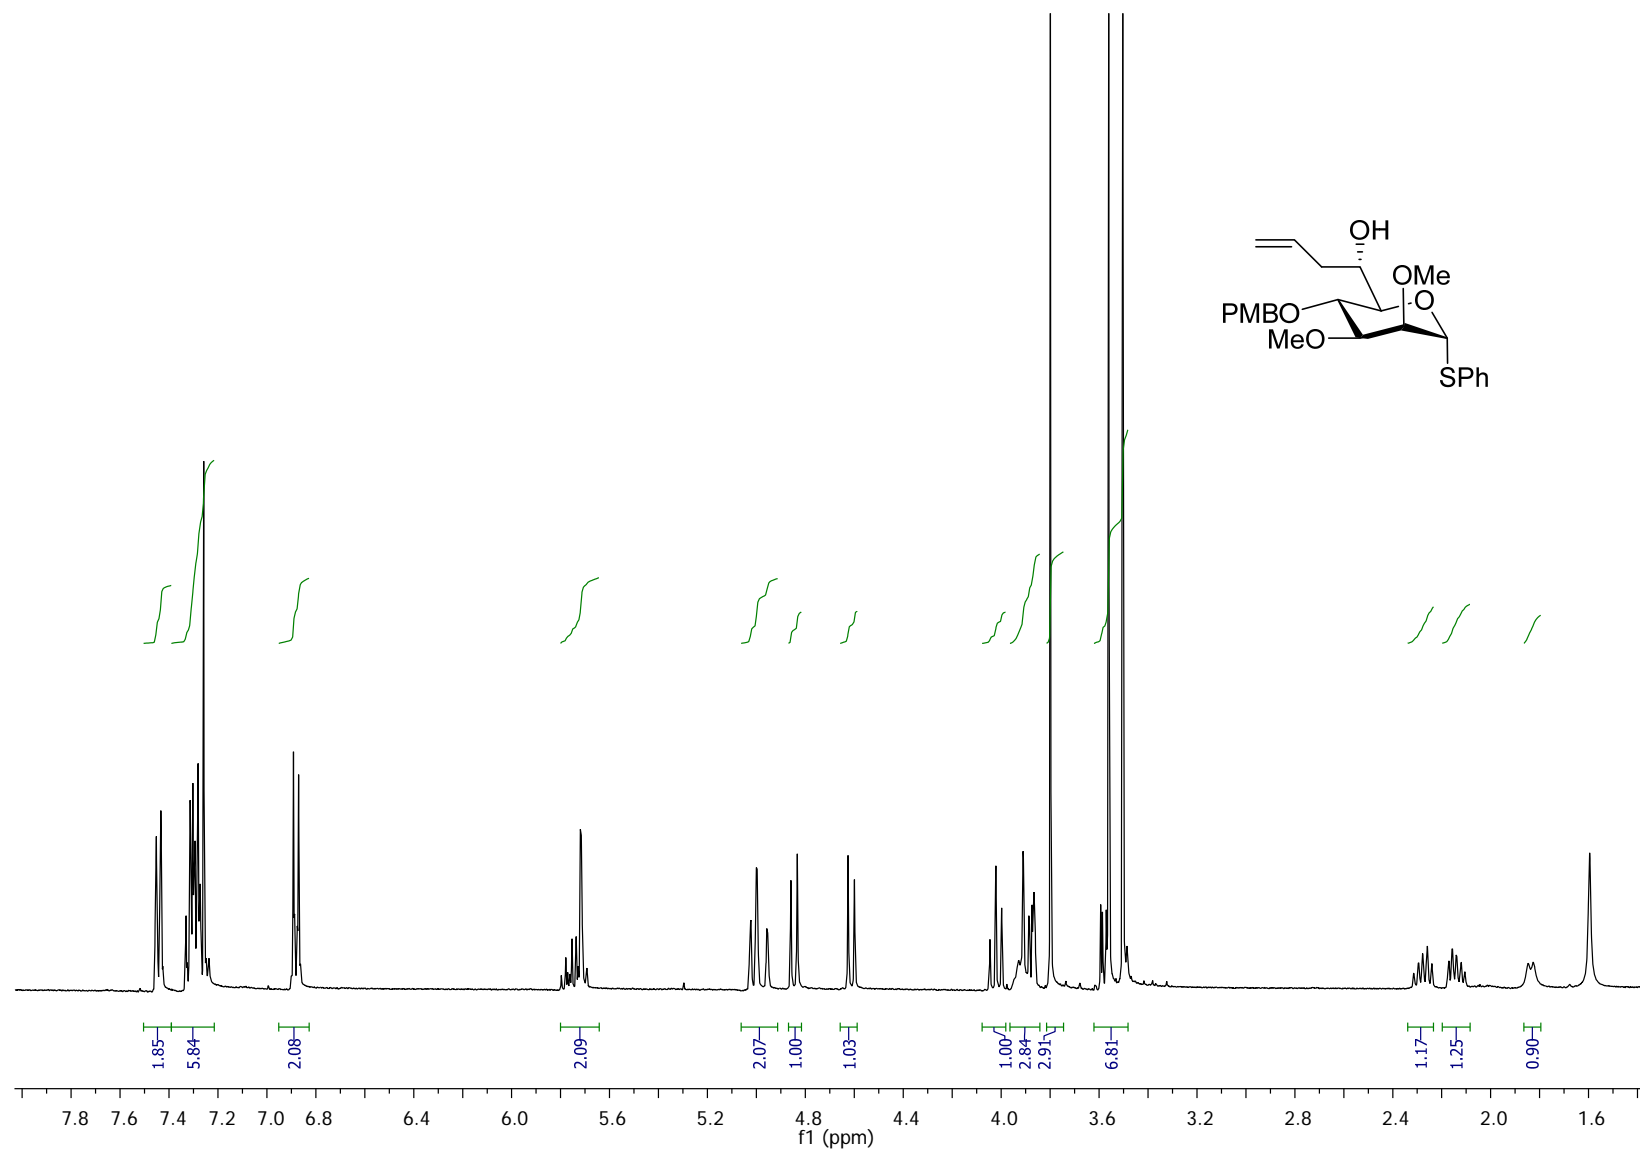

$^{13}\text{C}$  NMR (100 MHz,  $\text{CDCl}_3$ ) of (6*S*) Phenyl 6-*C*-Allyl-4-*O*-*p*-methoxybenzyl-2,3-di-*O*-methyl-1-thio- $\alpha$ -*D*-mannopyranoside (10)

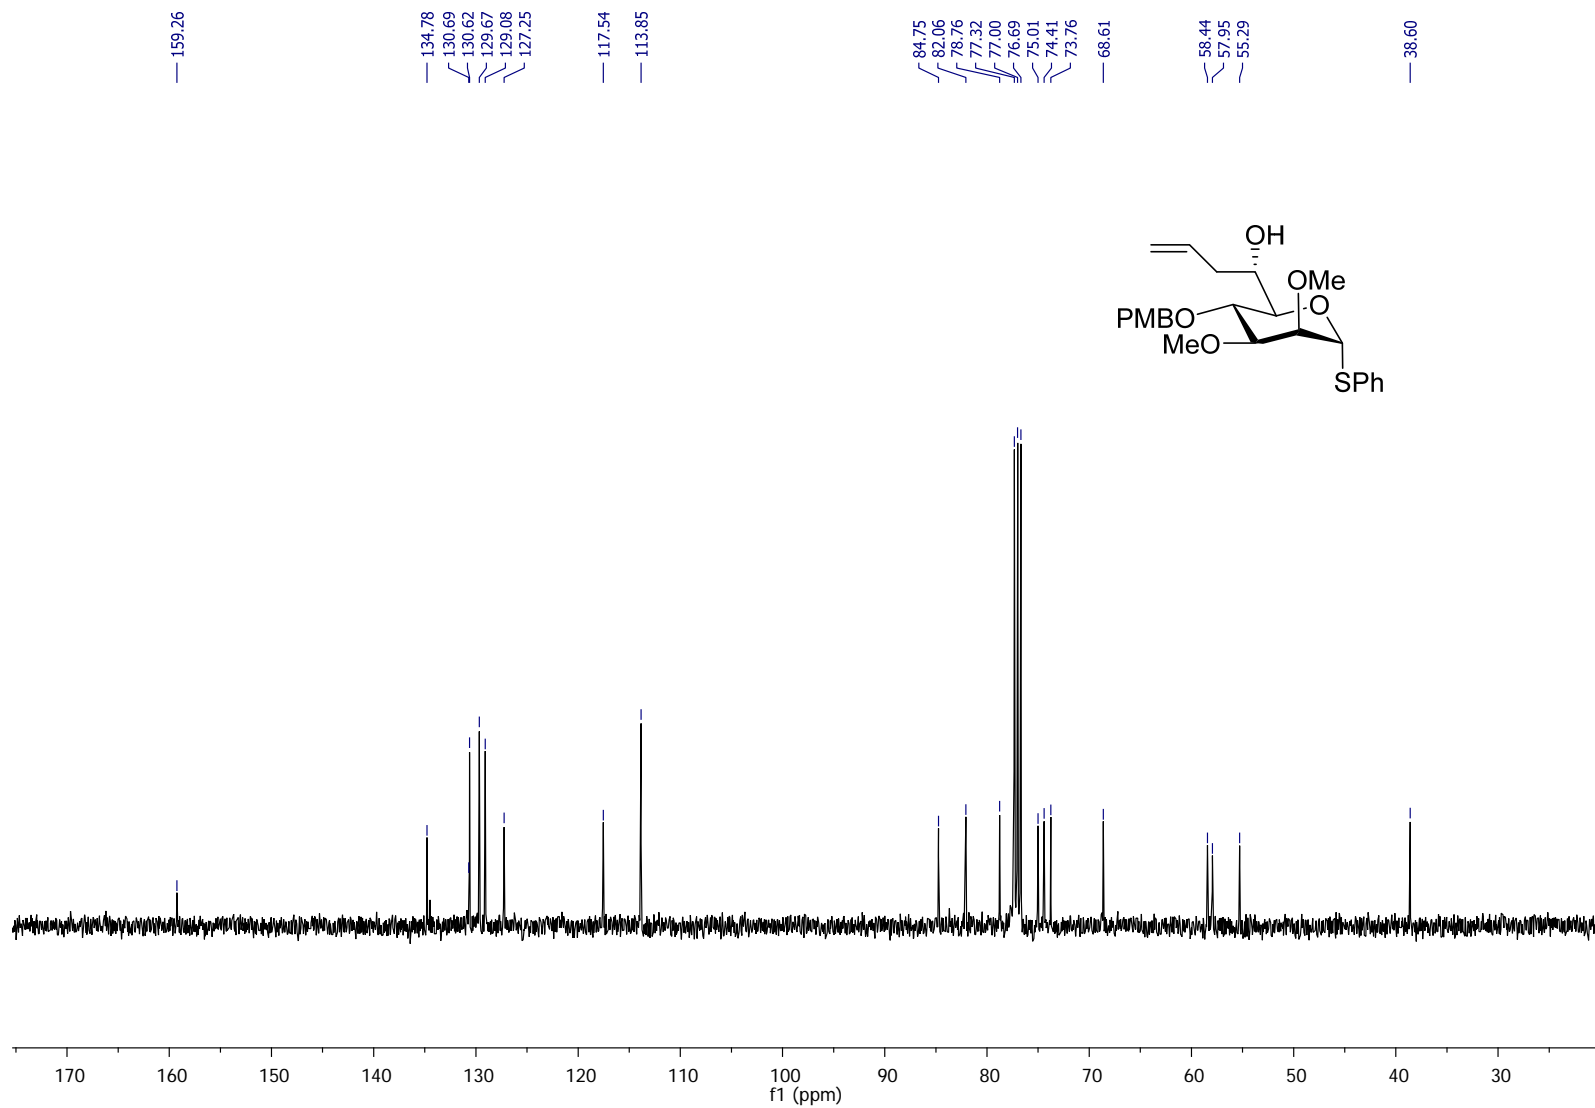

**<sup>1</sup>H NMR (600 MHz, CDCl<sub>3</sub>) of (6*R*) Phenyl 6-*C*-Allyl-4-*O*-benzyl-2,3,6-tri-*O*-methyl-1-thio- $\alpha$ -D-mannopyranoside (11)**

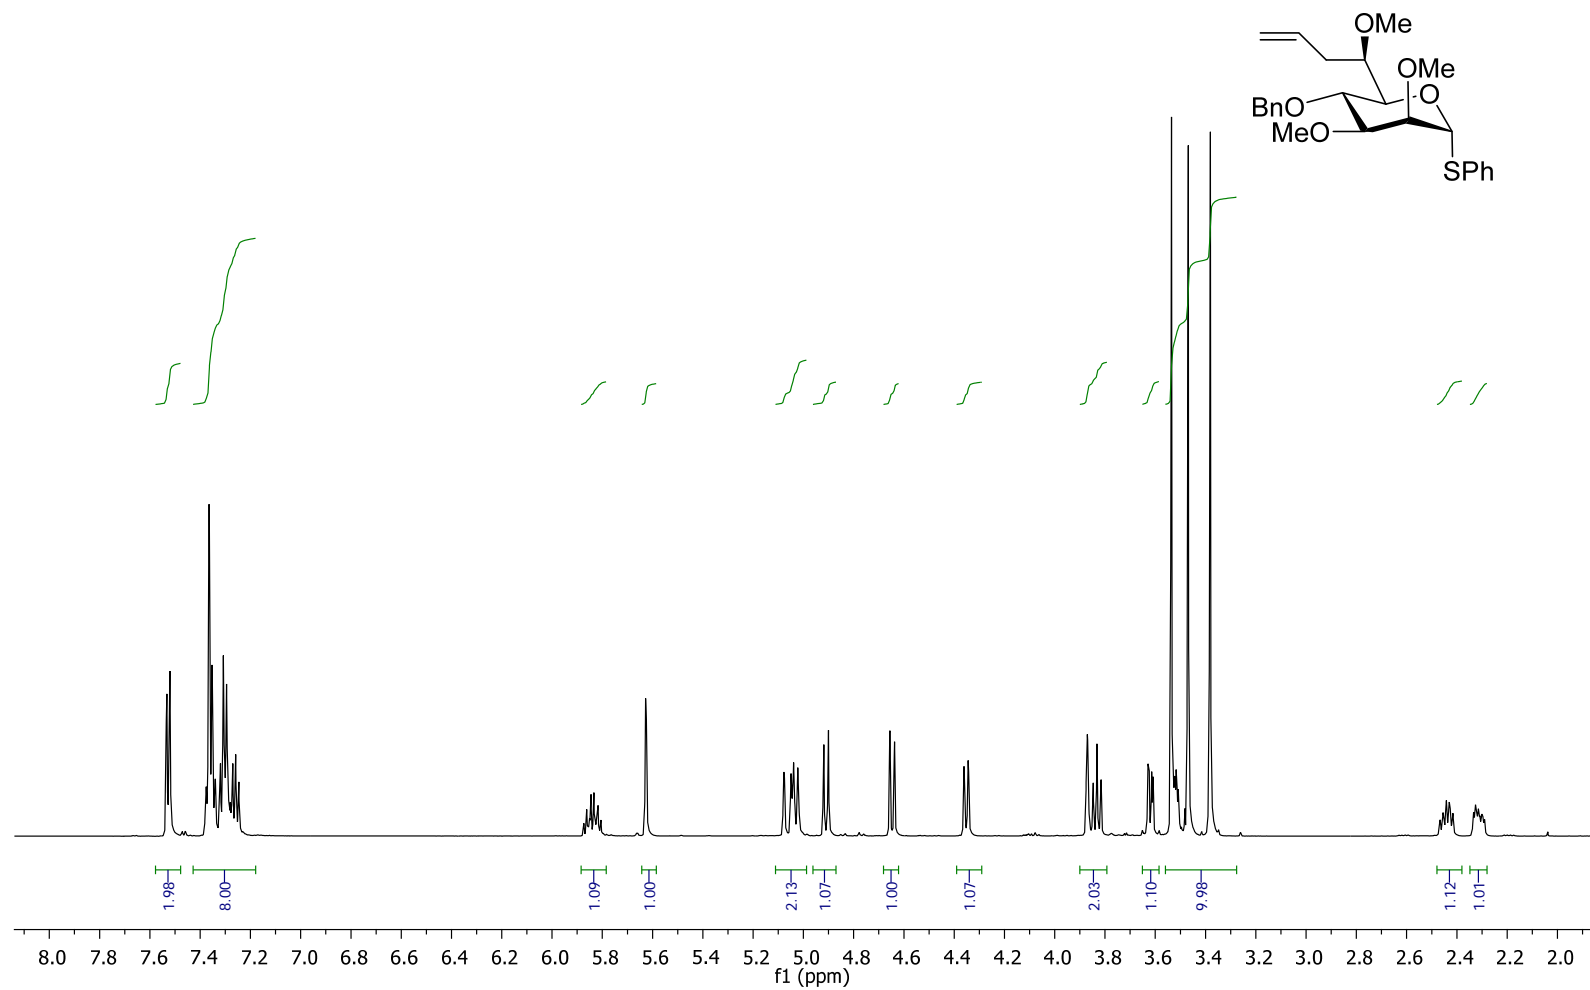

$^{13}\text{C}$  NMR (150 MHz,  $\text{CDCl}_3$ ) of (6*R*) Phenyl 6-*C*-Allyl-4-*O*-benzyl-2,3,6-tri-*O*-methyl-1-thio- $\alpha$ -D-mannopyranoside (11)

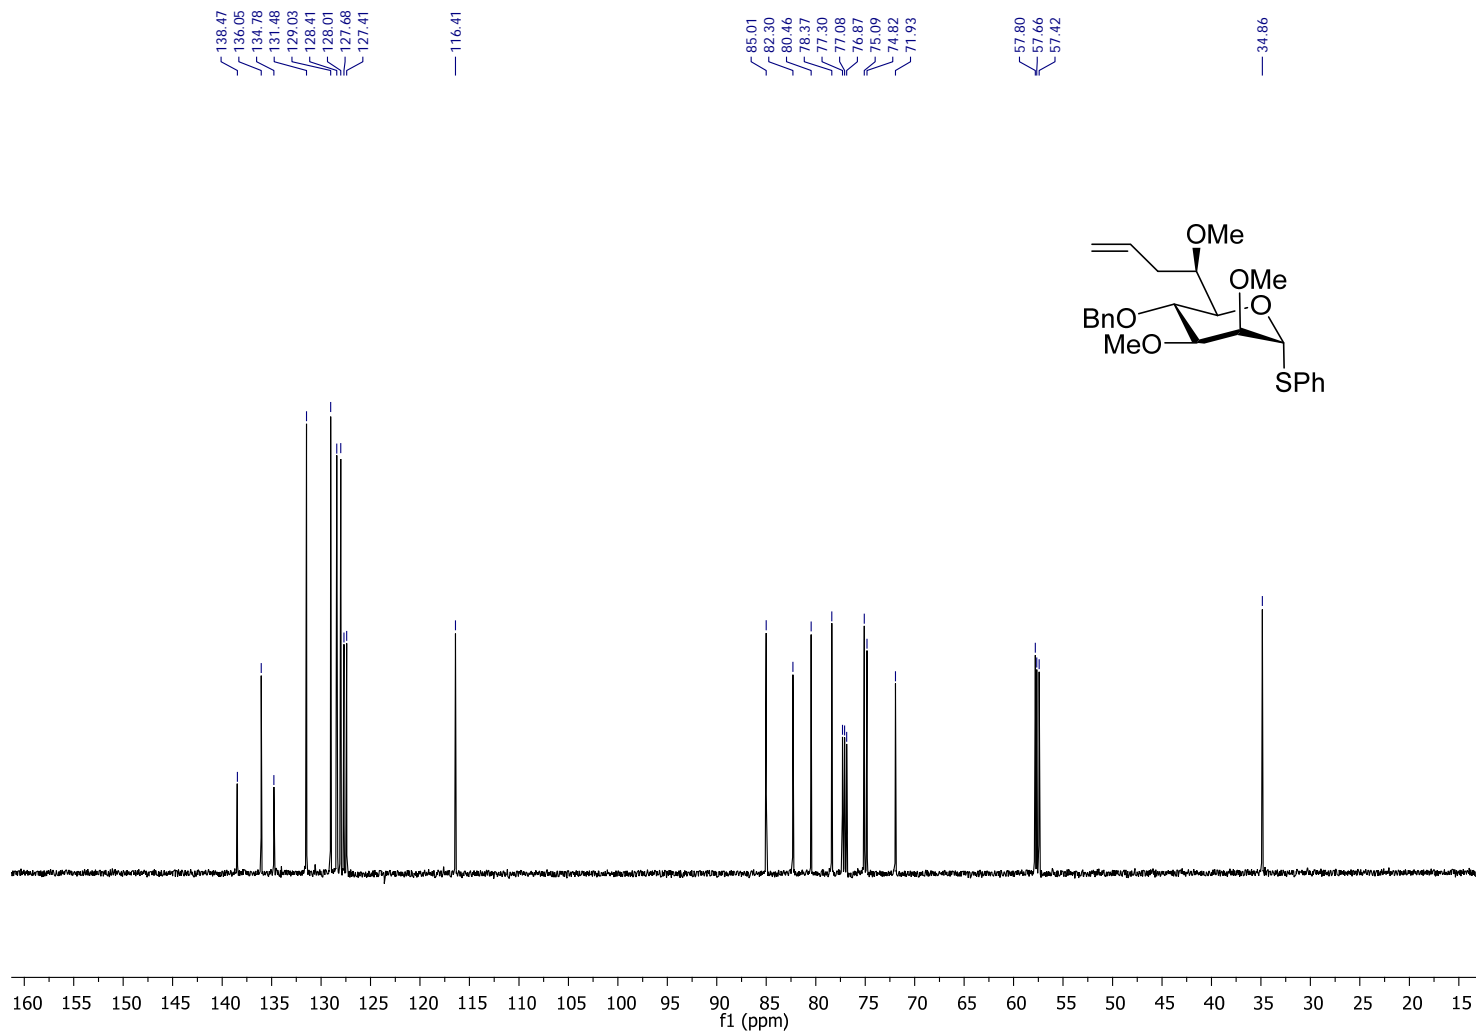

<sup>1</sup>H NMR (400 MHz, CDCl<sub>3</sub>) of (6*R*) Phenyl 6-*C*-Allyl-4-*O*-*p*-methoxybenzyl-2,3,6-tri-*O*-methyl--1-thio- $\alpha$ -D-mannopyranoside

(12)

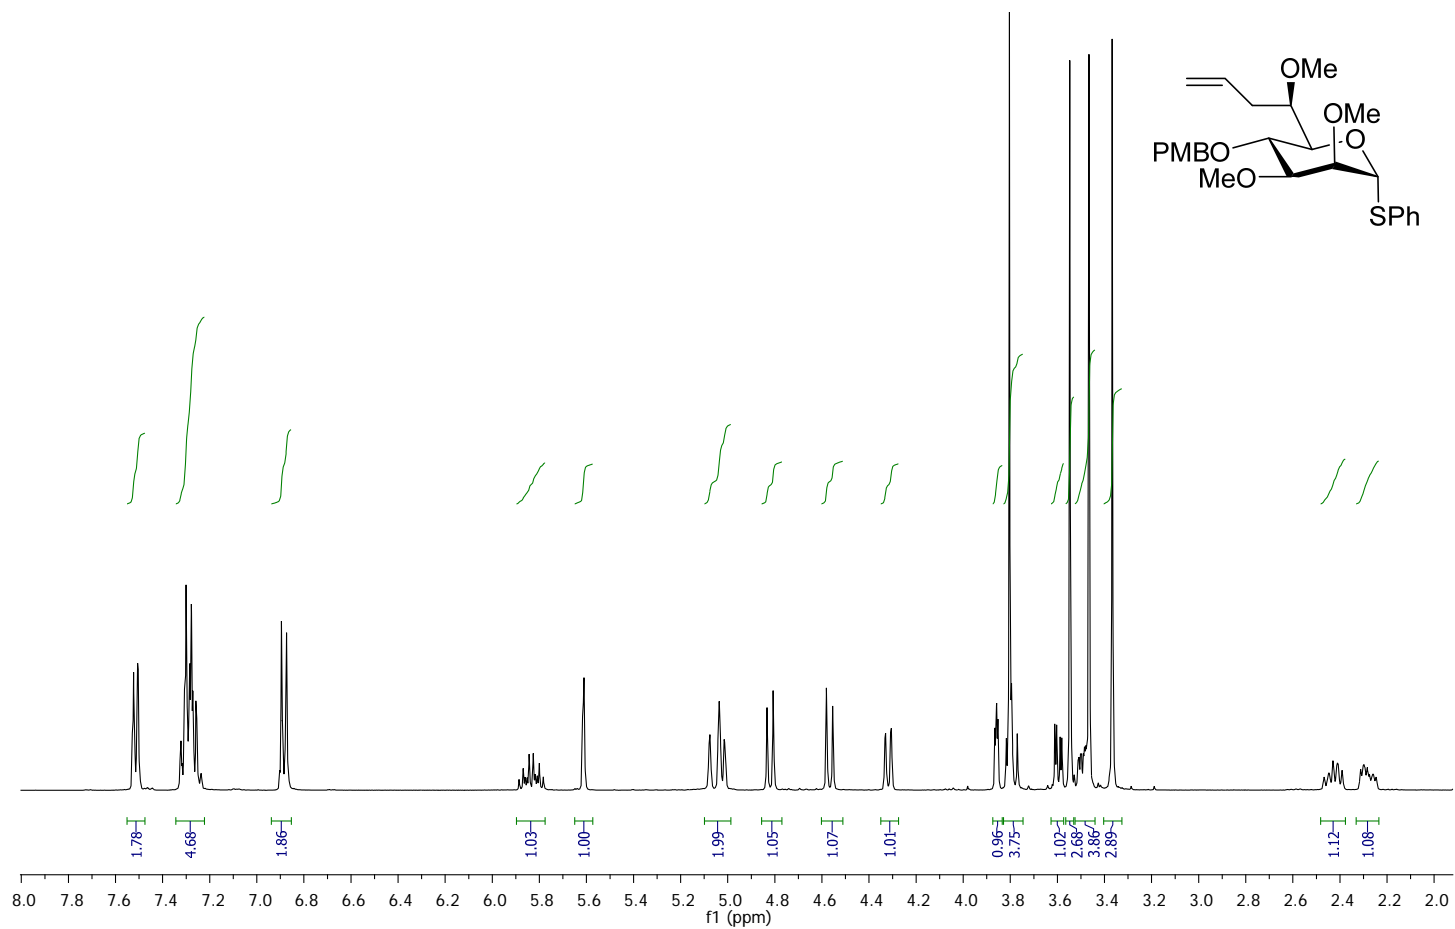

$^{13}\text{C}$  NMR (100 MHz,  $\text{CDCl}_3$ ) of (6*R*) Phenyl 6-*C*-Allyl-4-*O*-*p*-methoxybenzyl-2,3,6-tri-*O*-methyl--1-thio- $\alpha$ -D-mannopyranoside  
(12)

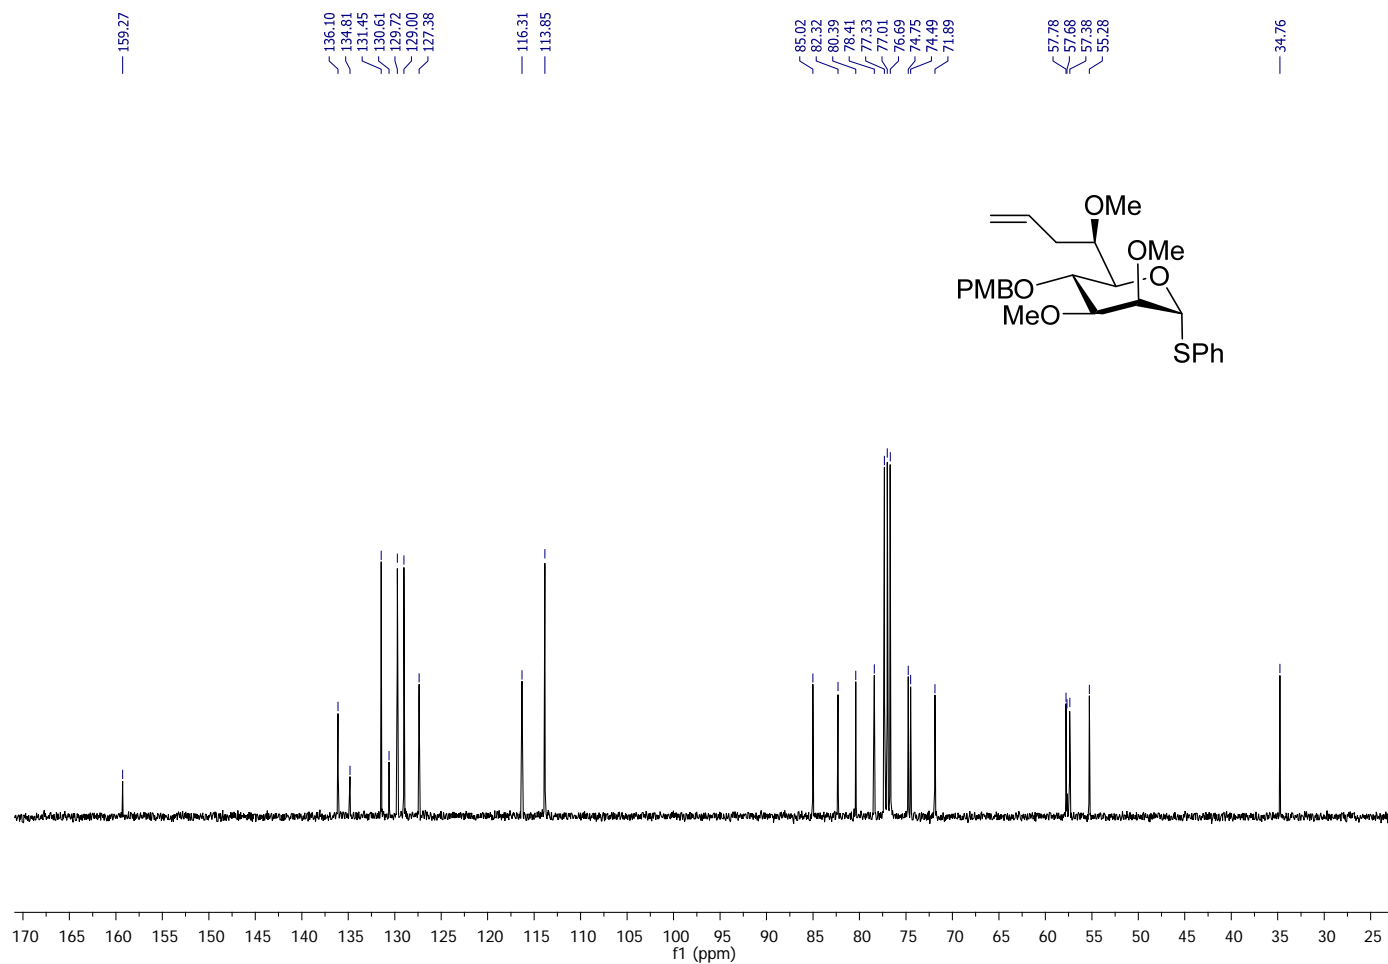

**<sup>1</sup>H NMR (600 MHz, CDCl<sub>3</sub>) of (6*S*) Phenyl 6-*C*-Allyl-4-*O*-benzyl-2,3,6-tri-*O*-methyl-1-thio- $\alpha$ -D-mannopyranoside (13)**

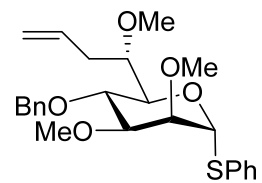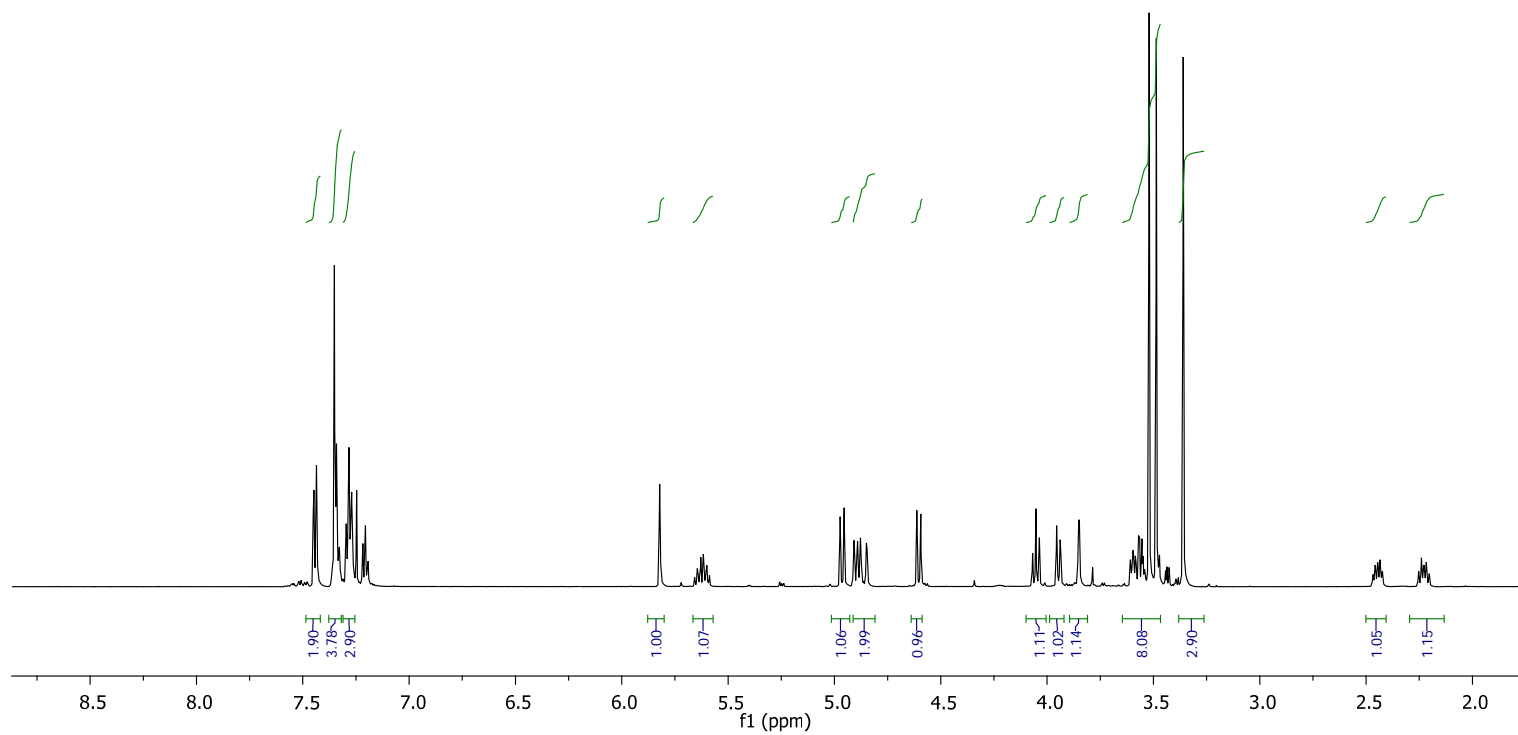

$^{13}\text{C}$  NMR (150 MHz,  $\text{CDCl}_3$ ) of (6*S*) Phenyl 6-*C*-Allyl-4-*O*-benzyl-2,3,6-tri-*O*-methyl-1-thio- $\alpha$ -*D*-mannopyranoside (13)

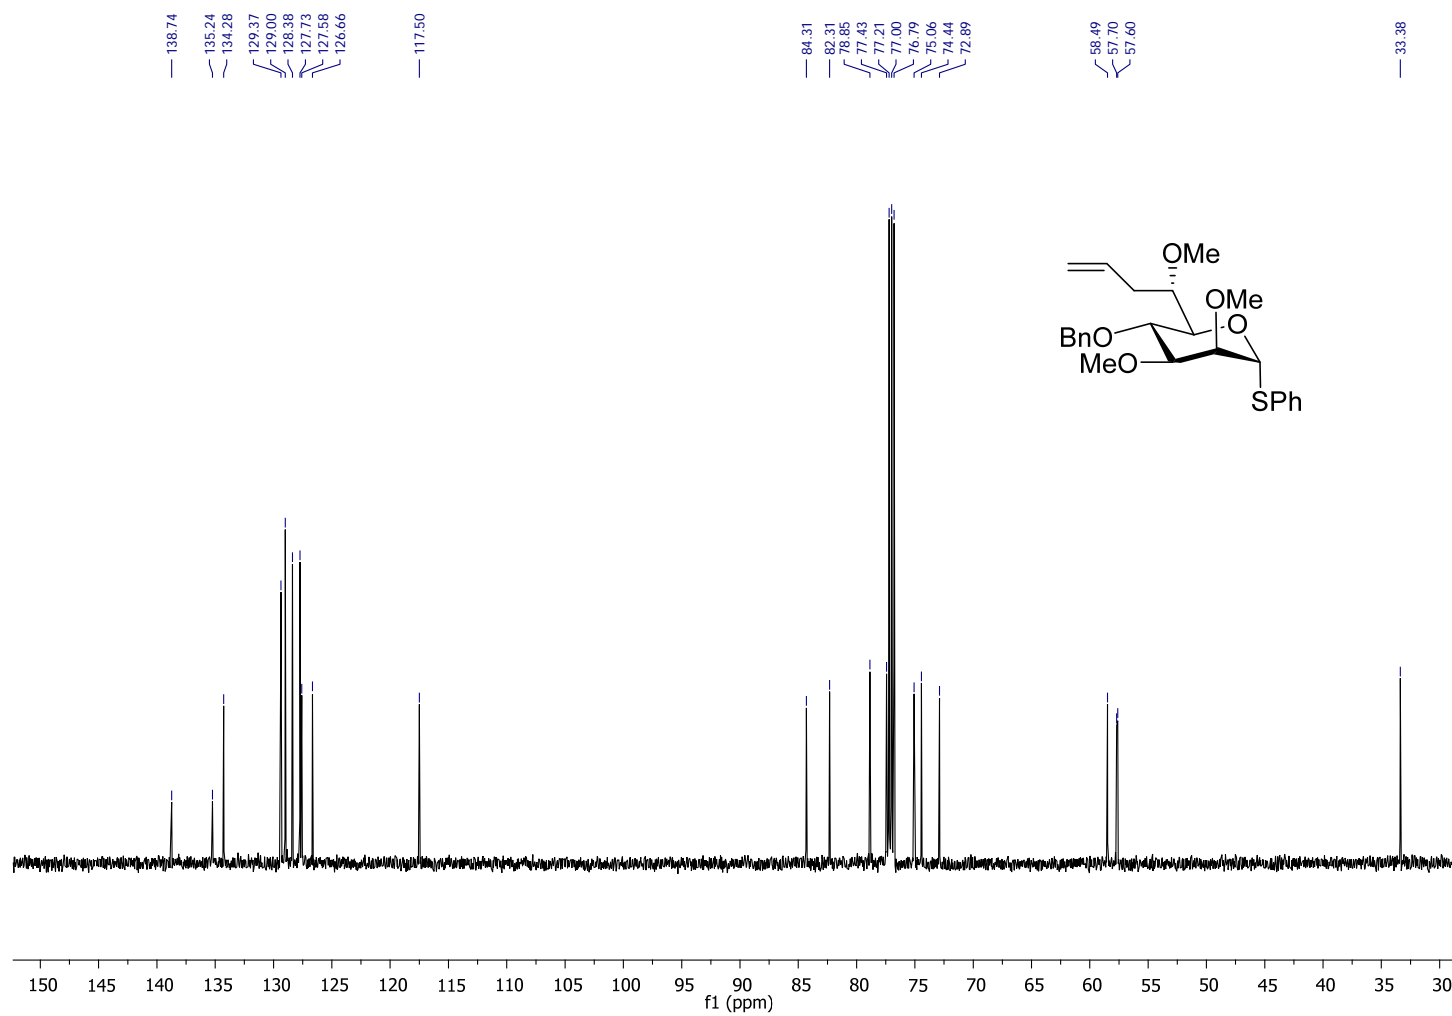



**<sup>1</sup>H NMR (400 MHz, CDCl<sub>3</sub>) of (6*S*) Phenyl 6-*C*-Allyl-4-*O*-*p*-methoxybenzyl-2,3,6-tri-*O*-methyl-1-thio- $\alpha$ -D-mannopyranoside**

(14)

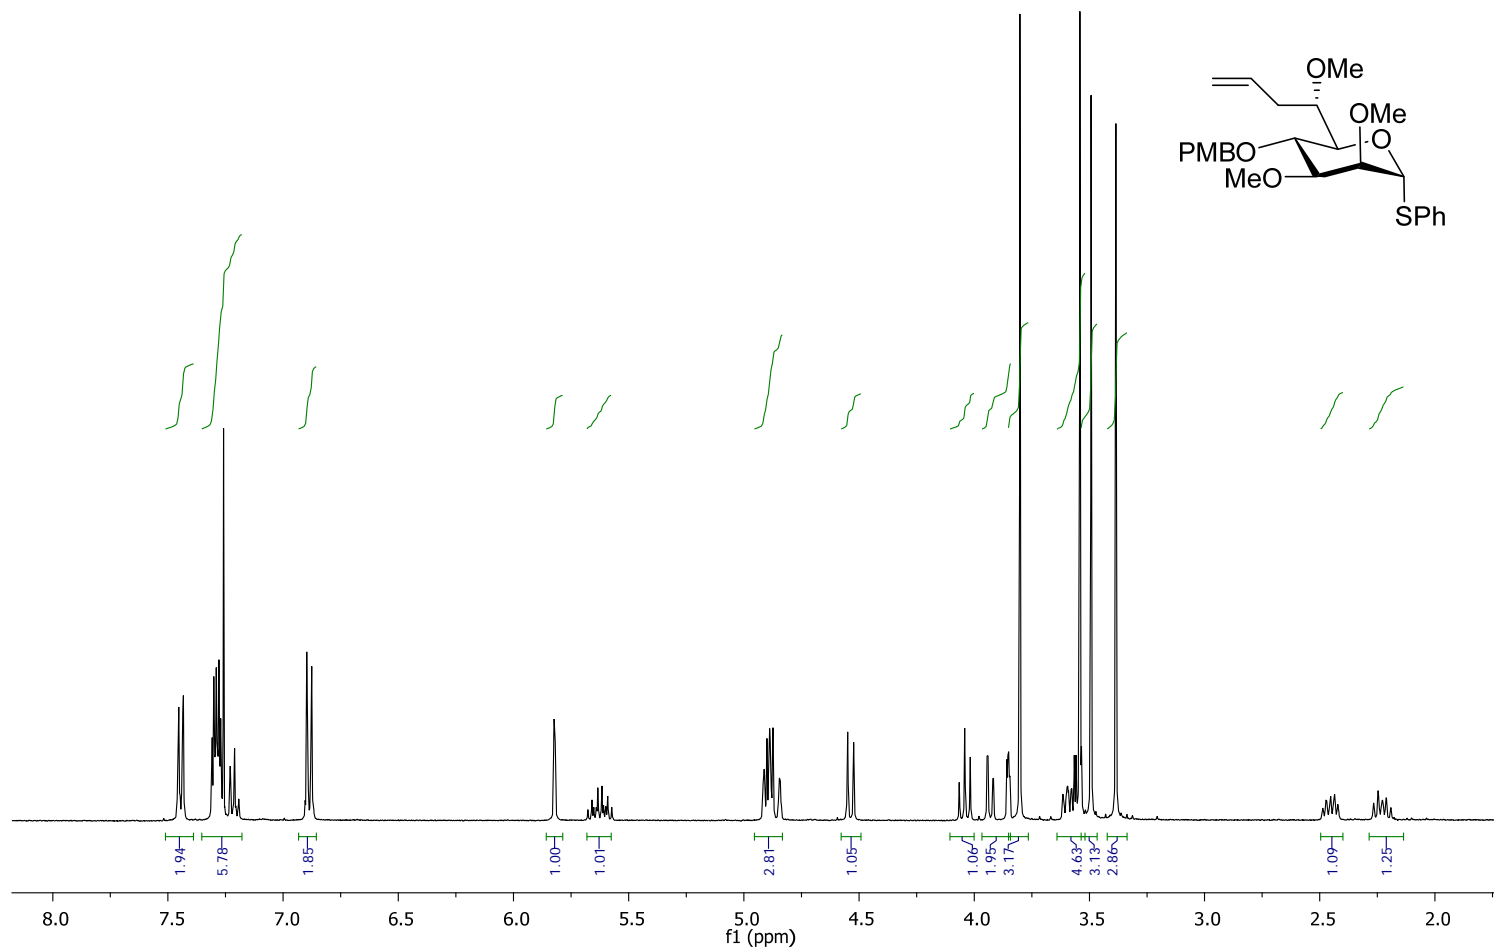

**<sup>13</sup>C NMR (100 MHz, CDCl<sub>3</sub>) of (6*S*) Phenyl 6-*C*-Allyl-4-*O*-*p*-methoxybenzyl-2,3,6-tri-*O*-methyl-1-thio- $\alpha$ -D-mannopyranoside  
(14)**

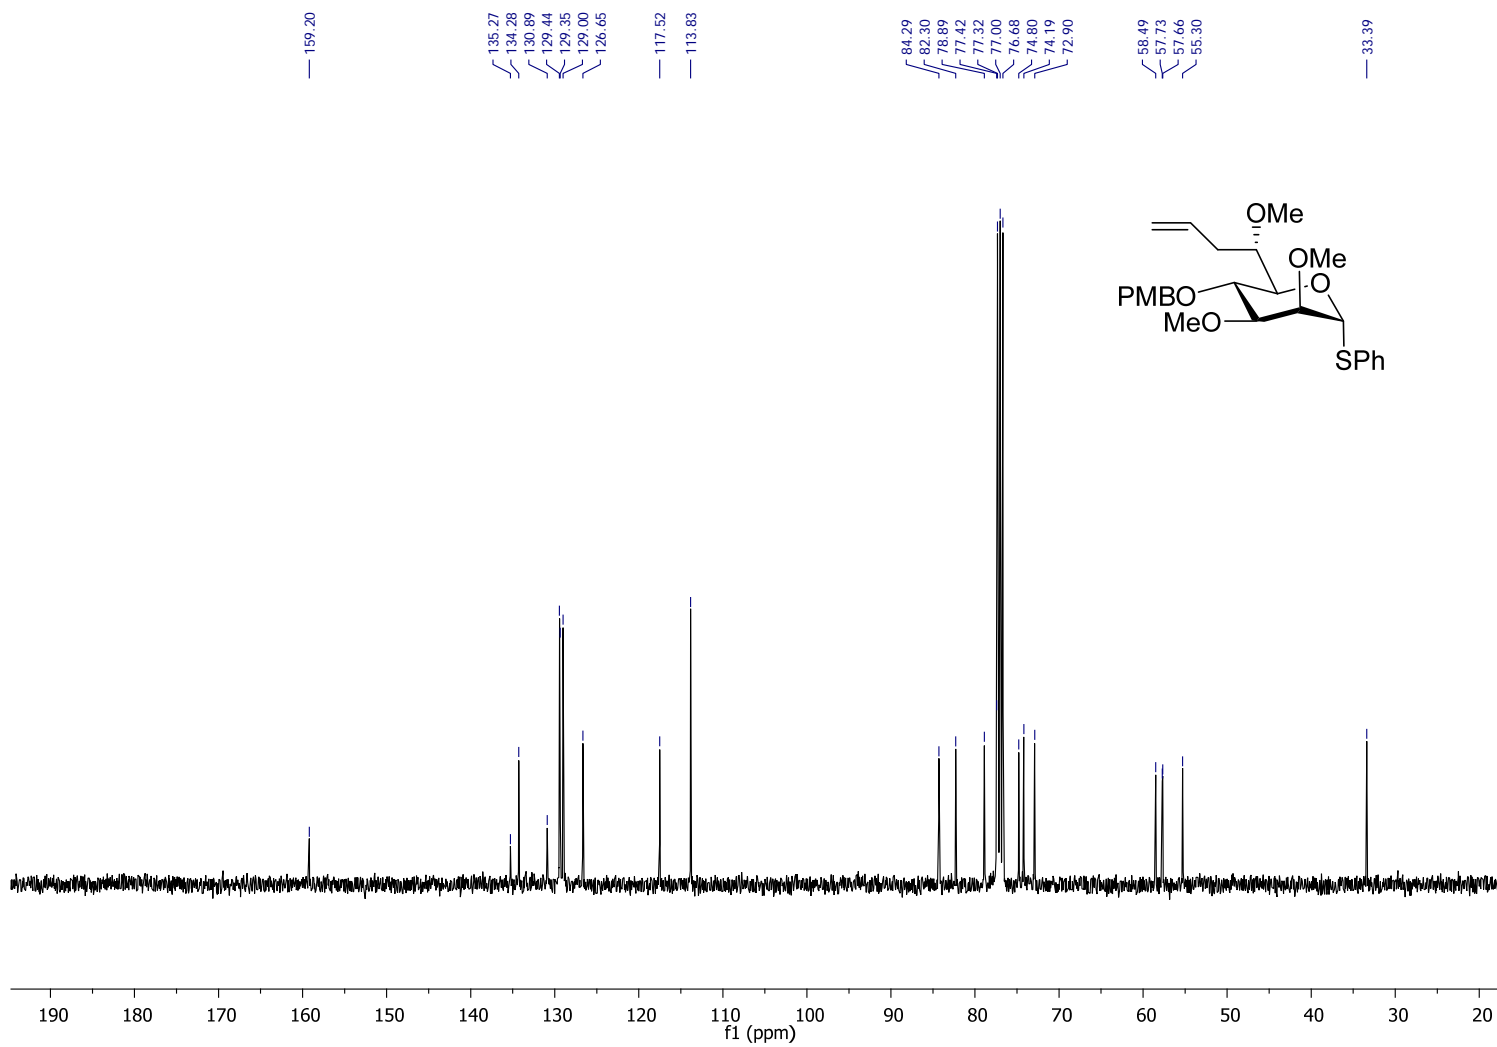

<sup>1</sup>H NMR (600 MHz, CDCl<sub>3</sub>) of Phenyl 4-*O*-benzyl-7-deoxy-2,3,6-tri-*O*-methyl-D-glycero- $\alpha$ -D- thio-mannoctopyranoside (15)

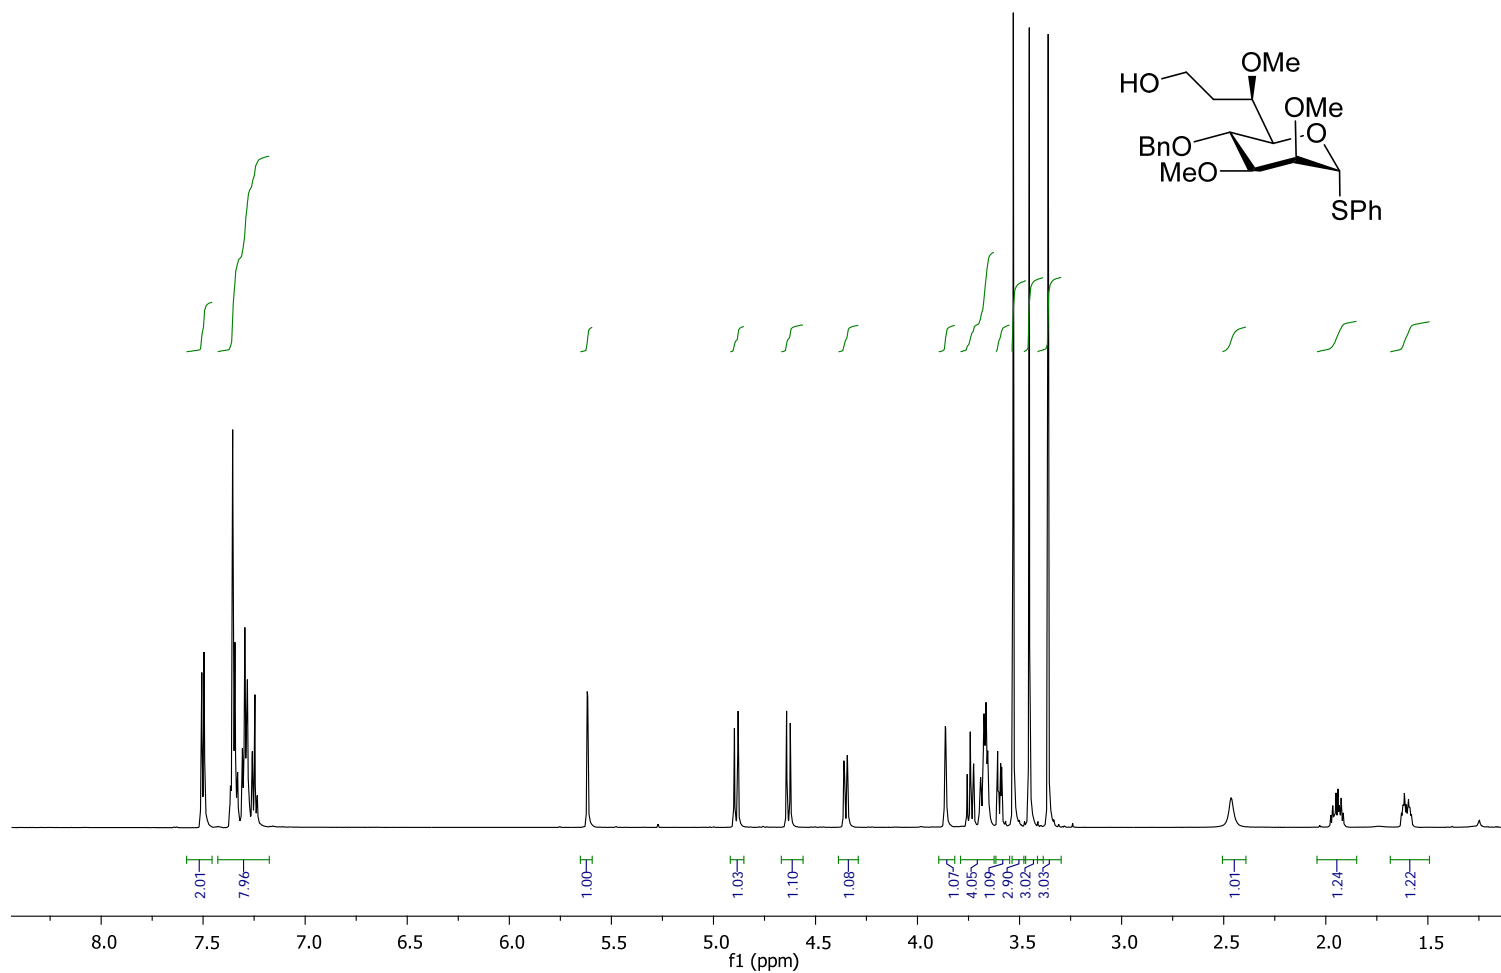

<sup>13</sup>C NMR (150 MHz, CDCl<sub>3</sub>) of Phenyl 4-*O*-benzyl-7-deoxy-2,3,6-tri-*O*-methyl-*D*-glycero- $\alpha$ -*D*-thio-mannoopyranoside (15)

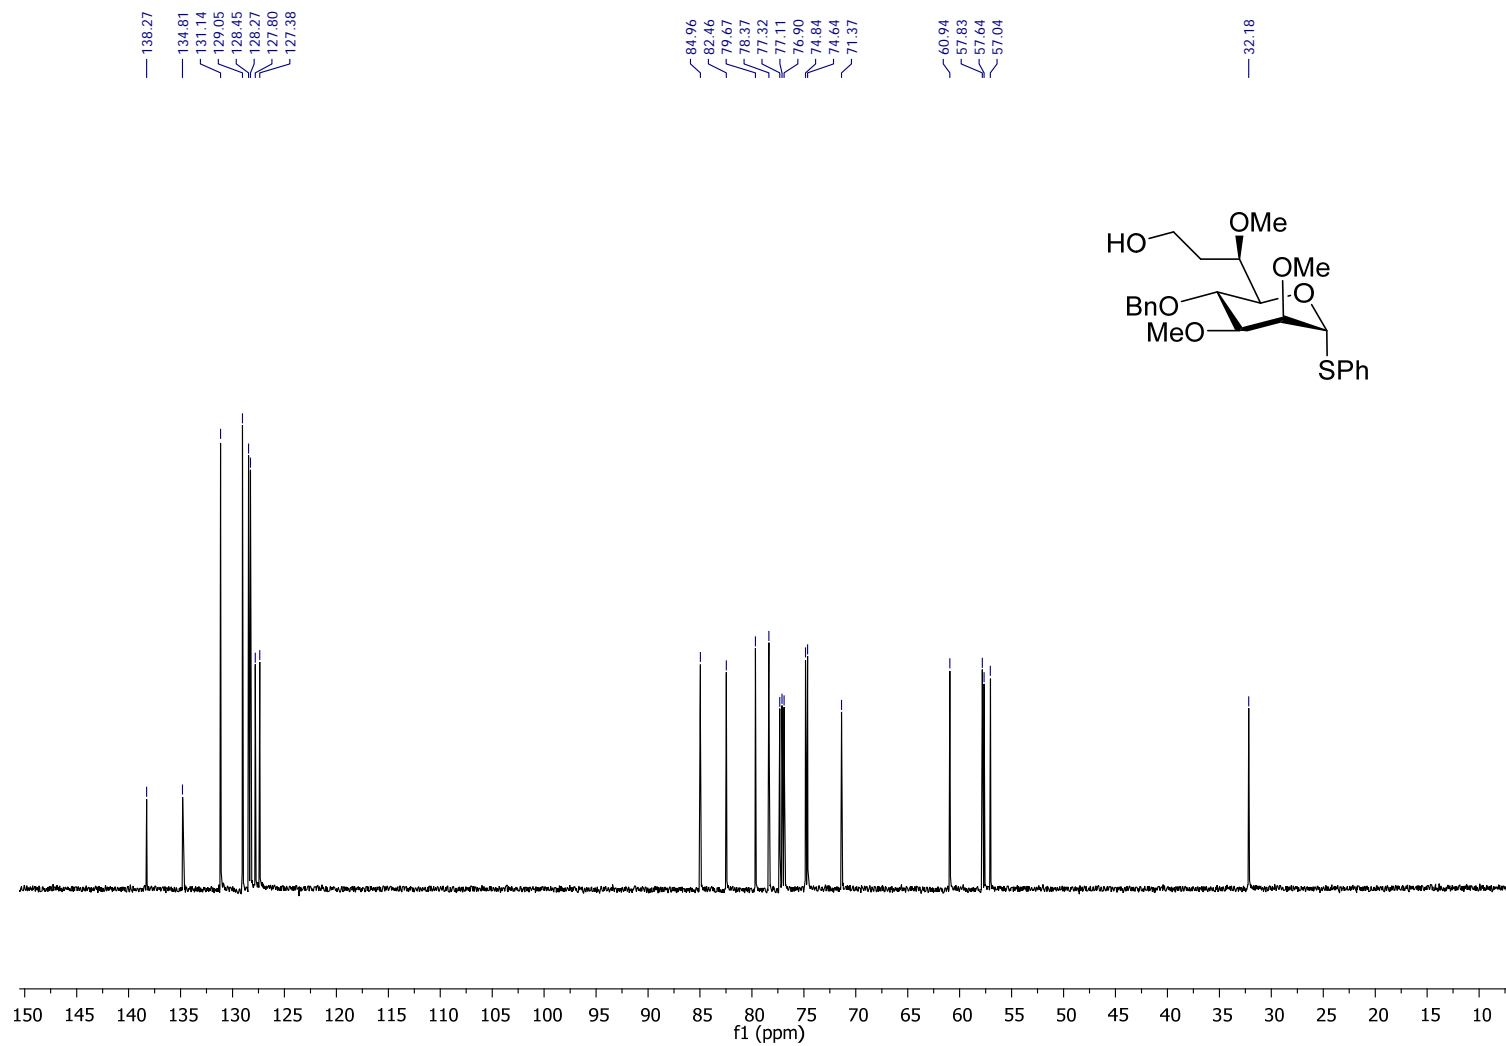

**<sup>1</sup>H NMR (400 MHz, CDCl<sub>3</sub>) of Phenyl 4-*O*-*p*-methoxybenzyl-7-deoxy-2,3,6-tri-*O*-methyl-D-glycero- $\alpha$ -D-thio-*manno*octopyranoside (16)**

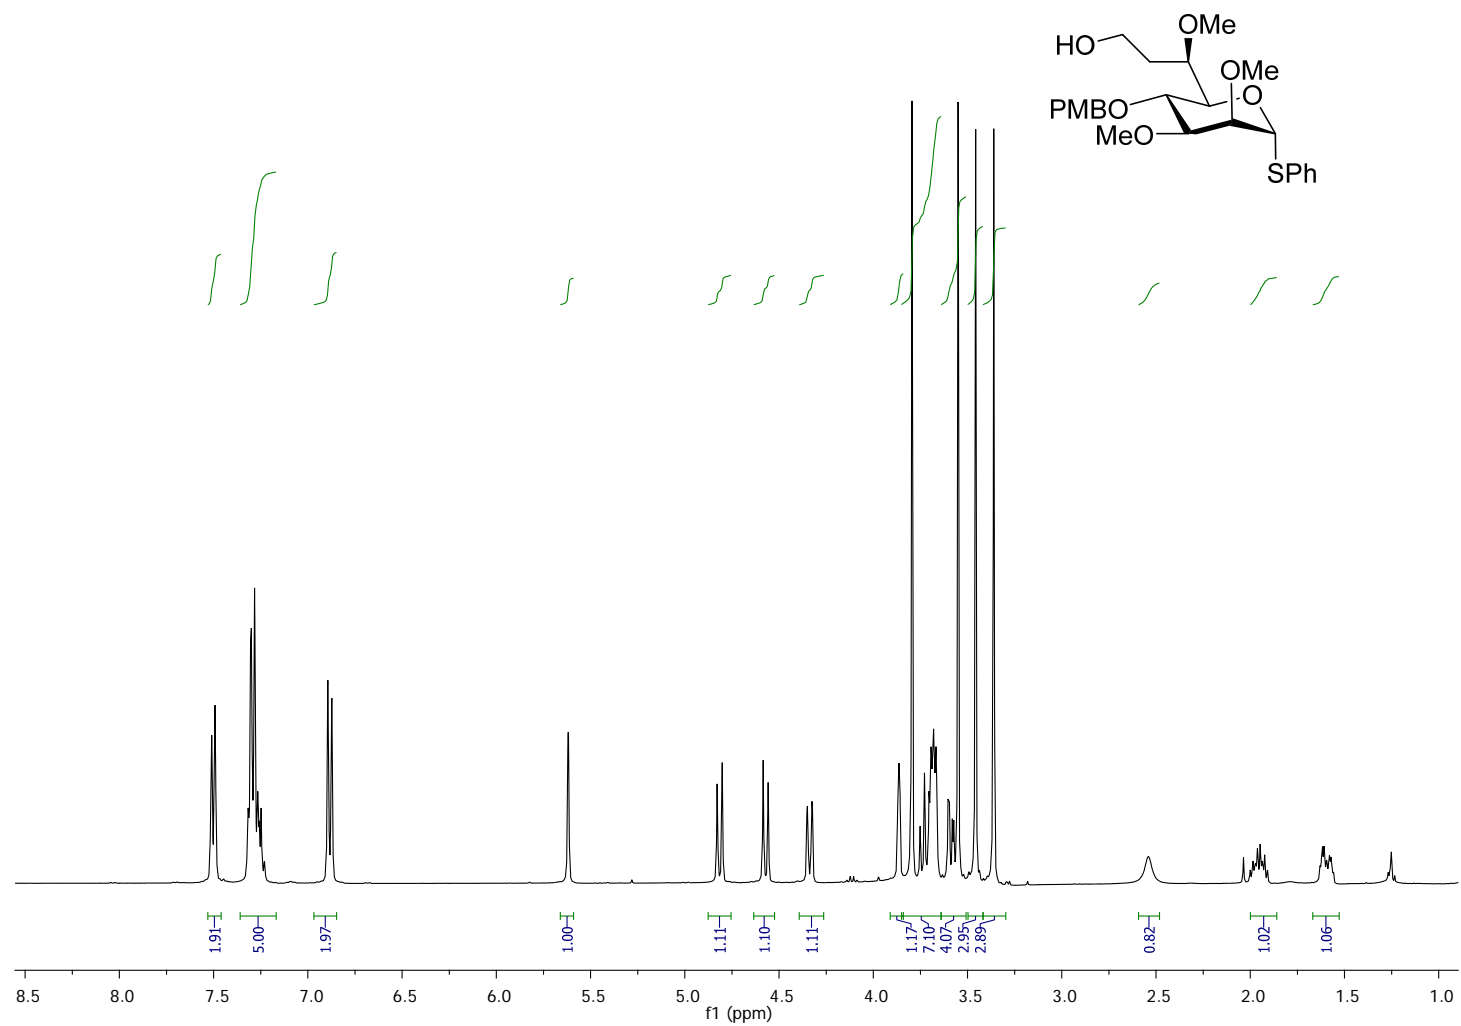

**$^{13}\text{C}$  NMR (100 MHz,  $\text{CDCl}_3$ ) of Phenyl 4-*O-p*-methoxybenzyl-7-deoxy-2,3,6-tri-*O*-methyl- $\alpha$ -D-thio-*mannoo*ctopyranoside (16)**

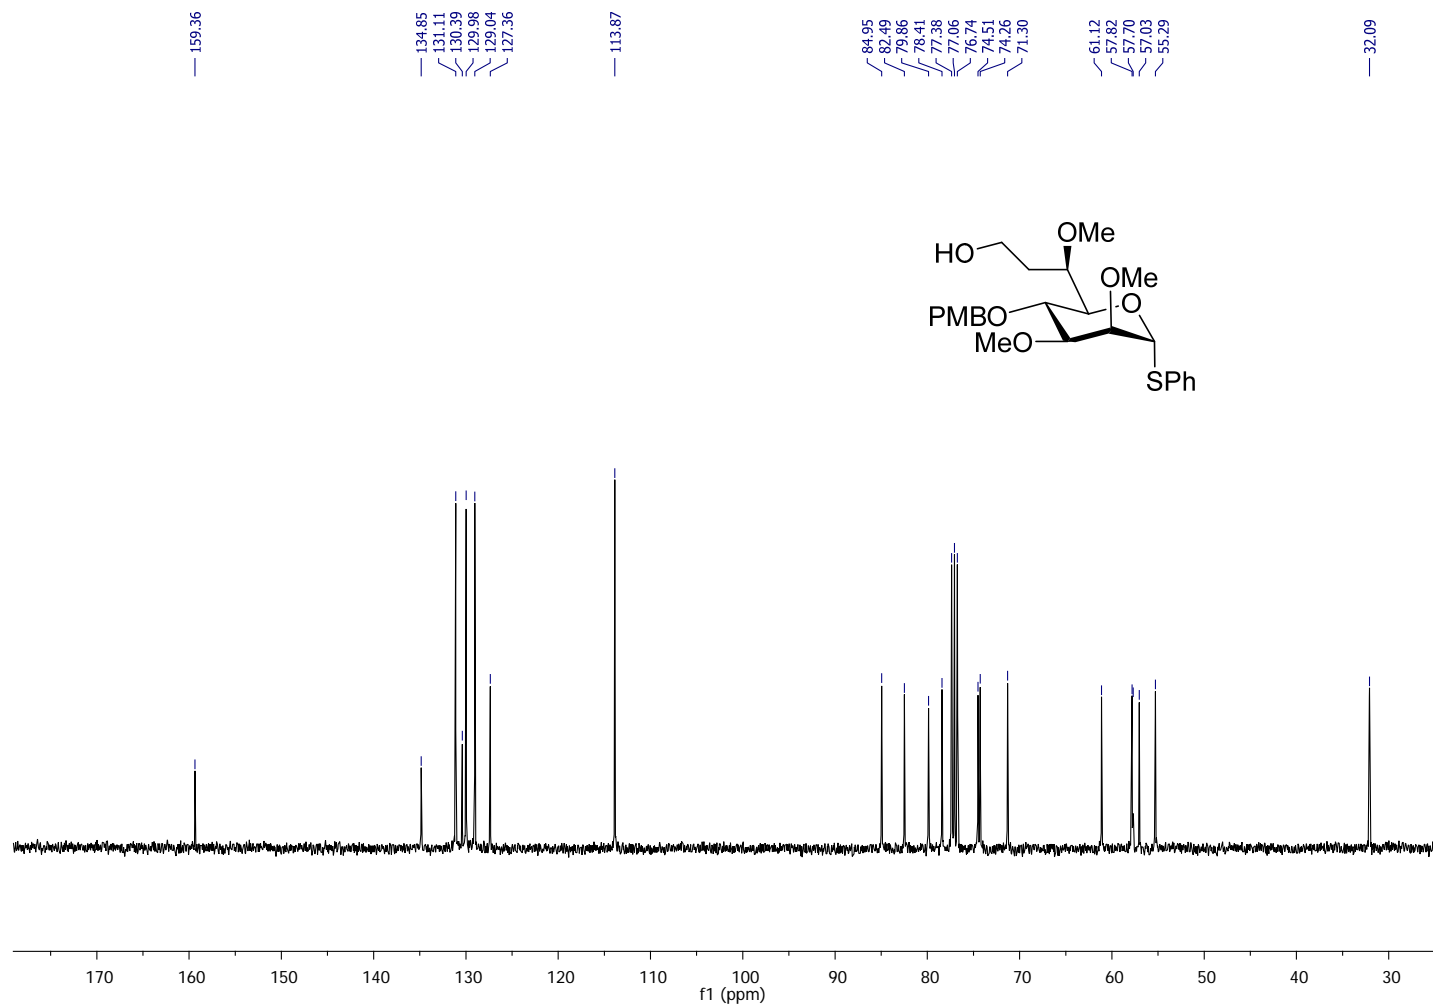

**<sup>1</sup>H NMR (600 MHz, CDCl<sub>3</sub>) of Phenyl 4-*O*-benzyl-7-deoxy-2,3,6-tri-*O*-methyl-L-glycero- $\alpha$ -D-thio-mannoopyranoside (17)**

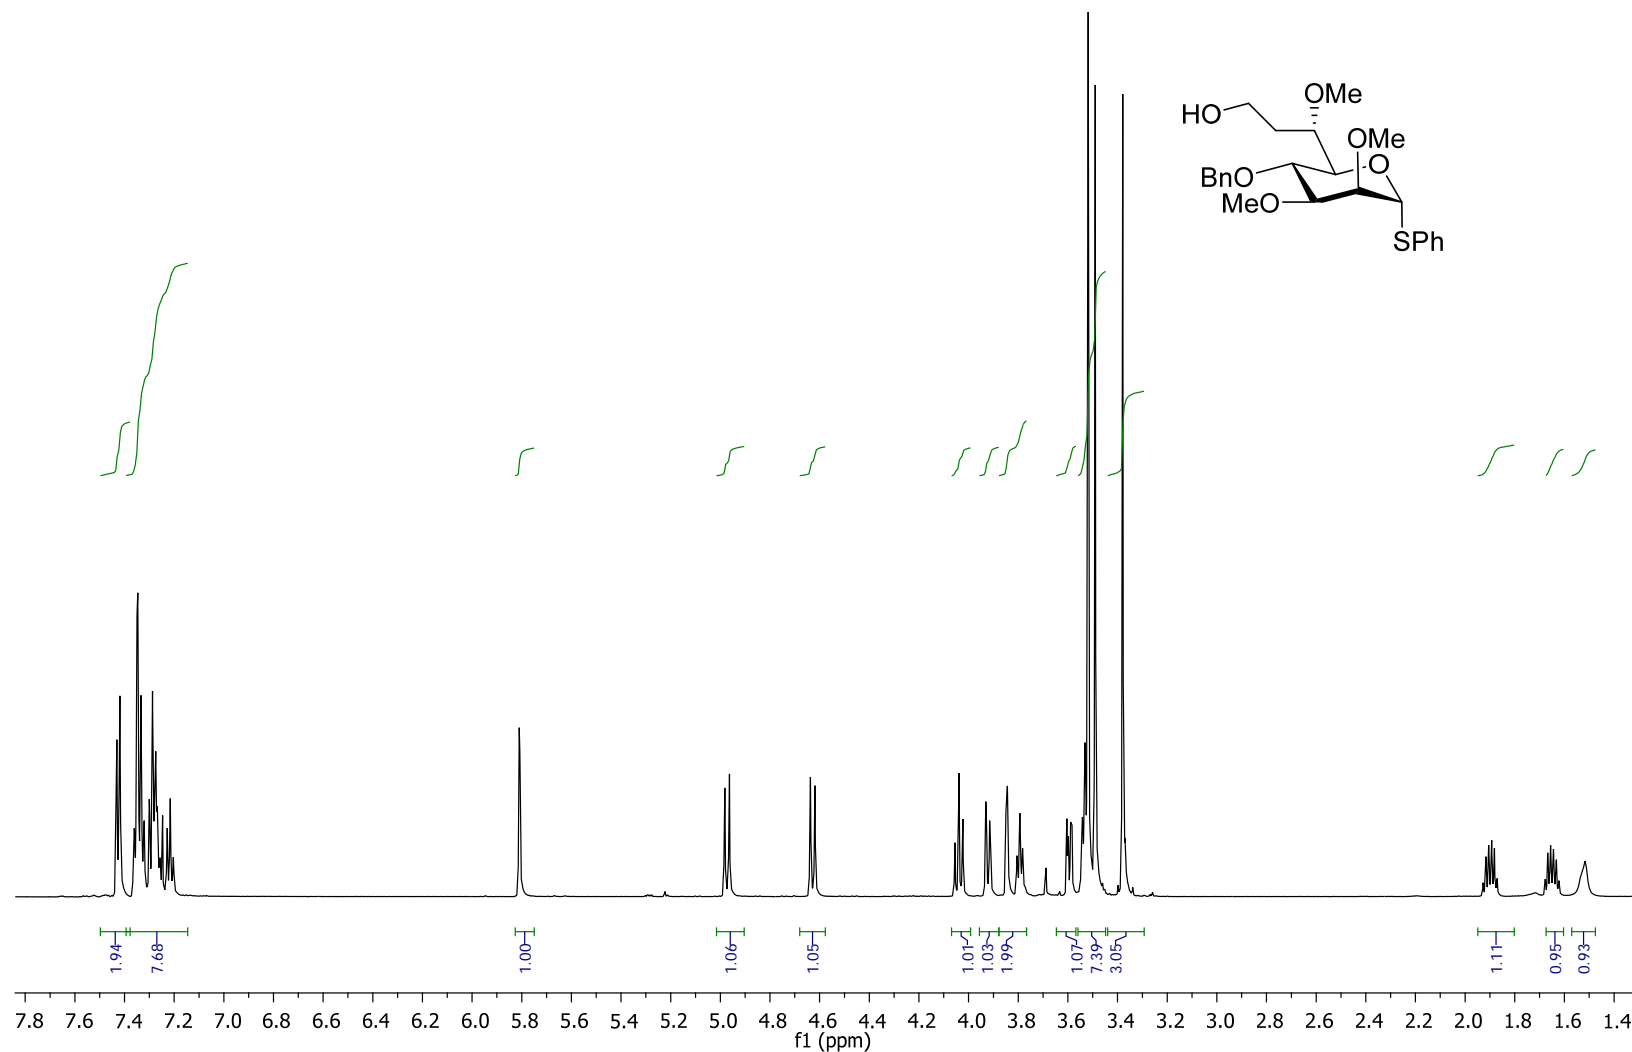

<sup>13</sup>C NMR (150 MHz, CDCl<sub>3</sub>) of Phenyl 4-*O*-benzyl-7-deoxy-2,3,6-tri-*O*-methyl-L-glycero- $\alpha$ -D-thio-mannoopyranoside (17)

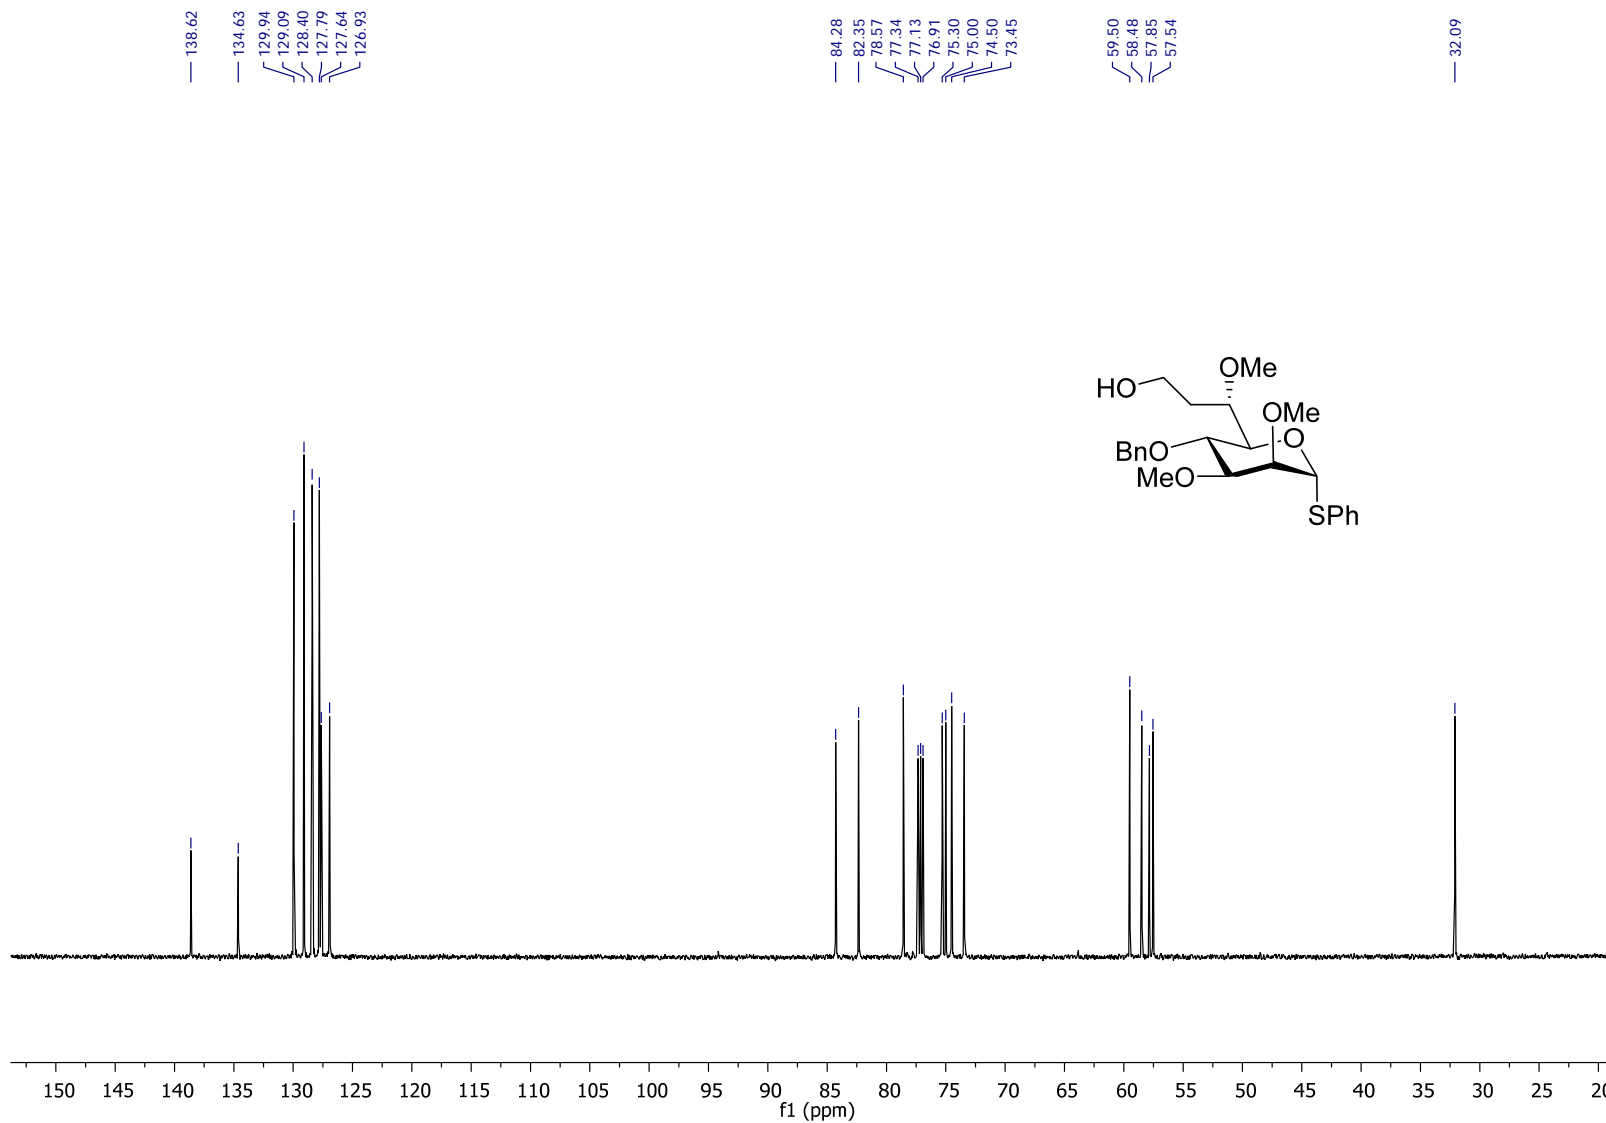



**<sup>1</sup>H NMR (400 MHz, CDCl<sub>3</sub>) of Phenyl 4-*O*-*p*-methoxybenzyl-7-deoxy-2,3,6-tri-*O*-methyl-L-glycero- $\alpha$ -D-thio-*mannoo*ctopyranoside (18)**

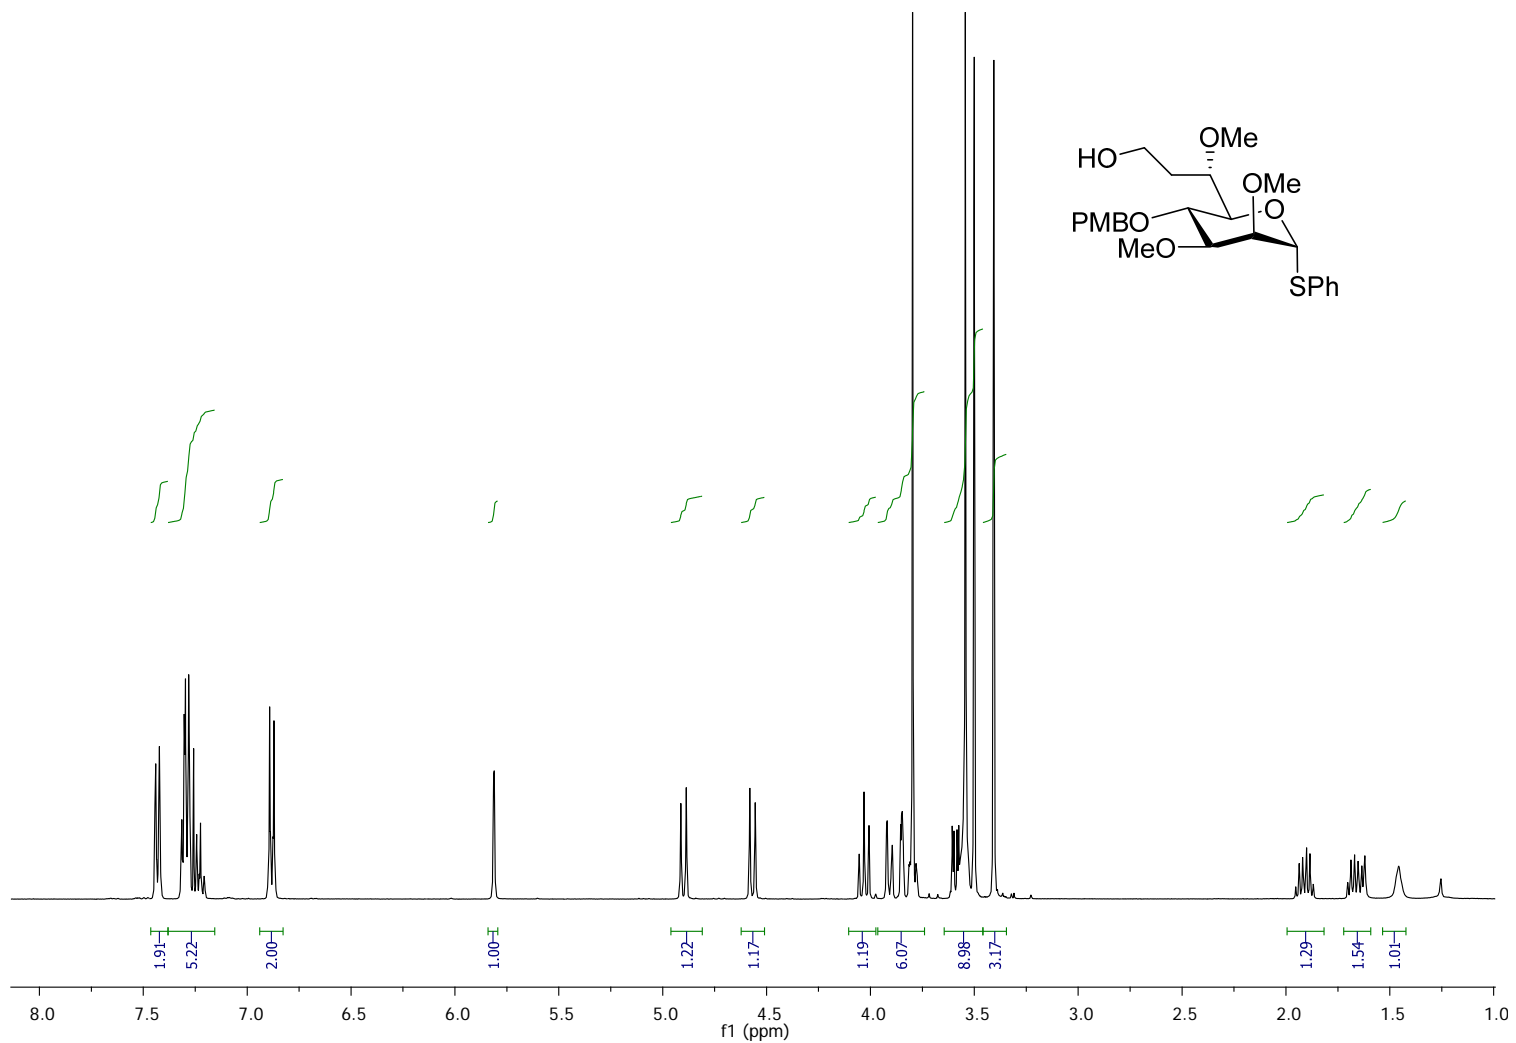

**$^{13}\text{C}$  NMR (100 MHz,  $\text{CDCl}_3$ ) of Phenyl 4-*O*-*p*-methoxybenzyl-7-deoxy-2,3,6-tri-*O*-methyl-L-glycero- $\alpha$ -D-thio-*mannooctopyranoside* (18)**

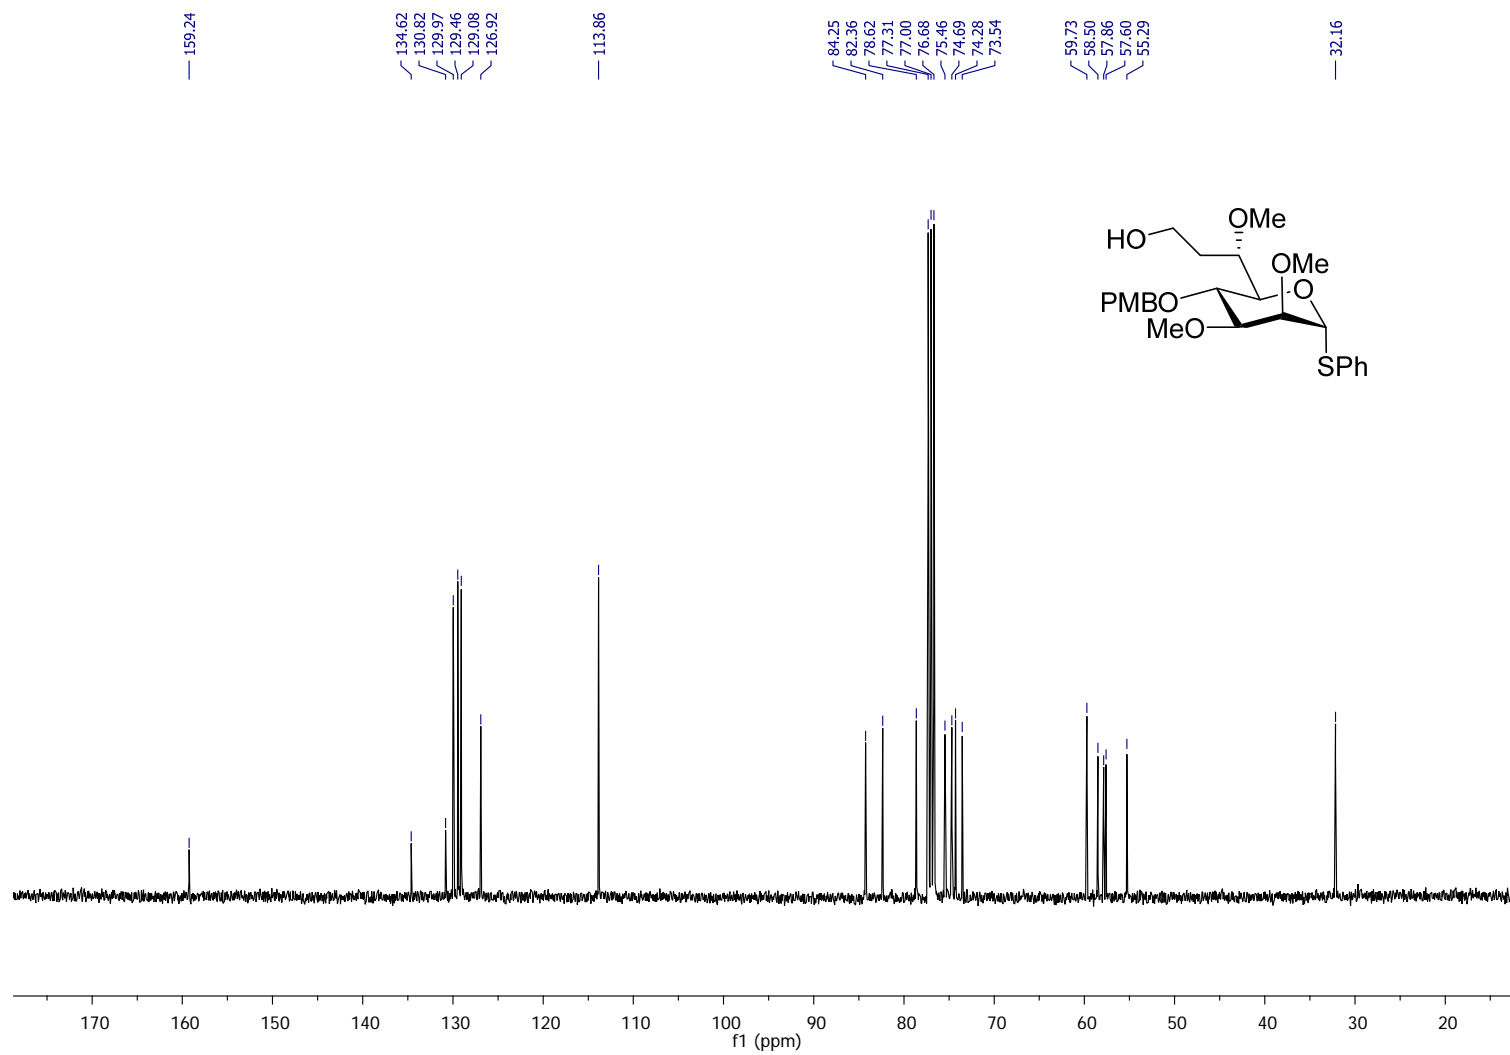

<sup>1</sup>H NMR (400 MHz, CDCl<sub>3</sub>) of Phenyl 7-deoxy-2,3,6-tri-O-methyl-D-glycero- $\alpha$ -D-thio-mannoctofuranoside (19)

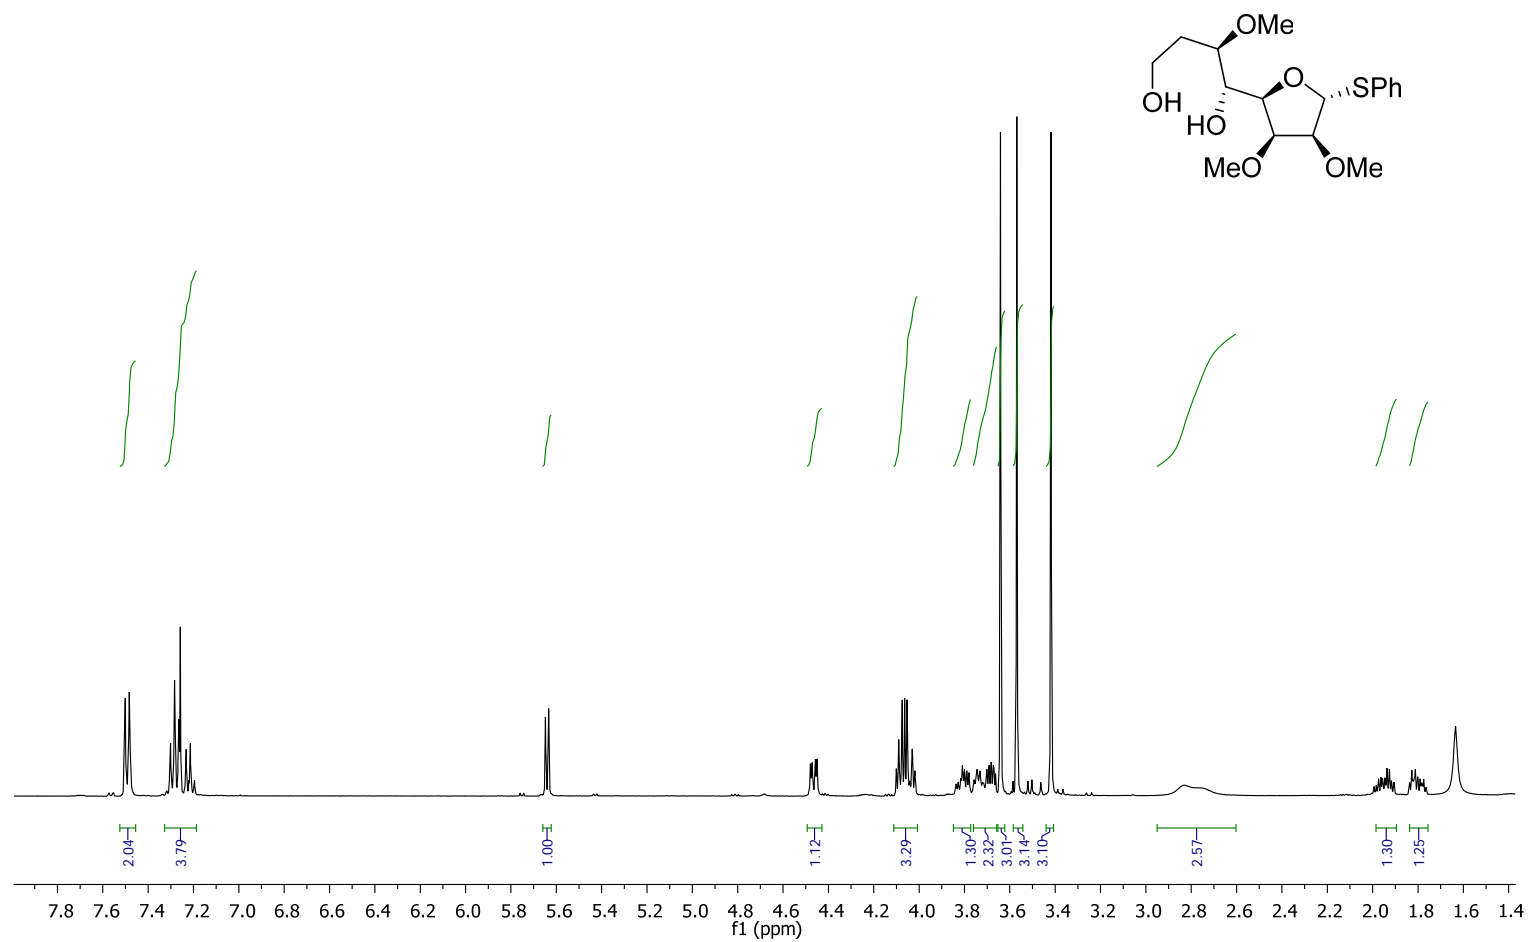

<sup>13</sup>C NMR (100 MHz, CDCl<sub>3</sub>) of Phenyl 7-deoxy-2,3,6-tri-*O*-methyl-D-glycero- $\alpha$ -D-thio-mannoctofuranoside (19)

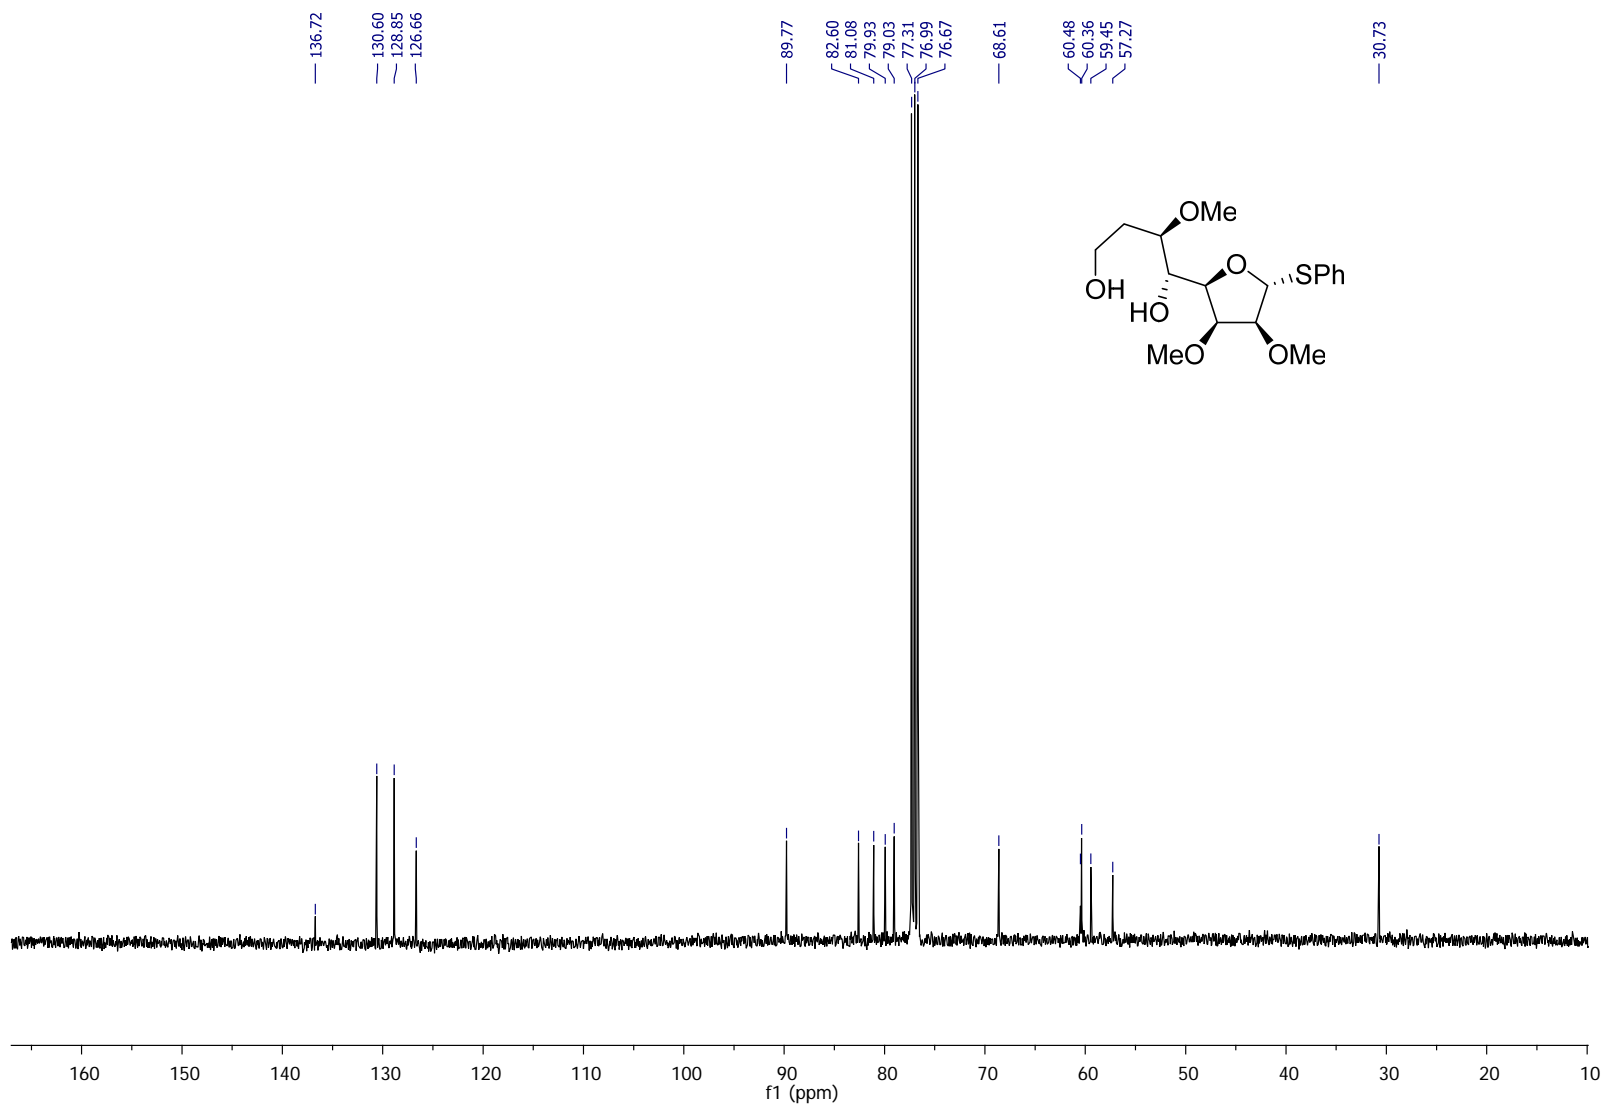

<sup>1</sup>H NMR (600 MHz, CDCl<sub>3</sub>) of Phenyl 5,8-anhydro-7-deoxy-2,3,6-tri-*O*-methyl-D-glycero- $\alpha$ -D-thio-mannoctofuranoside (20)

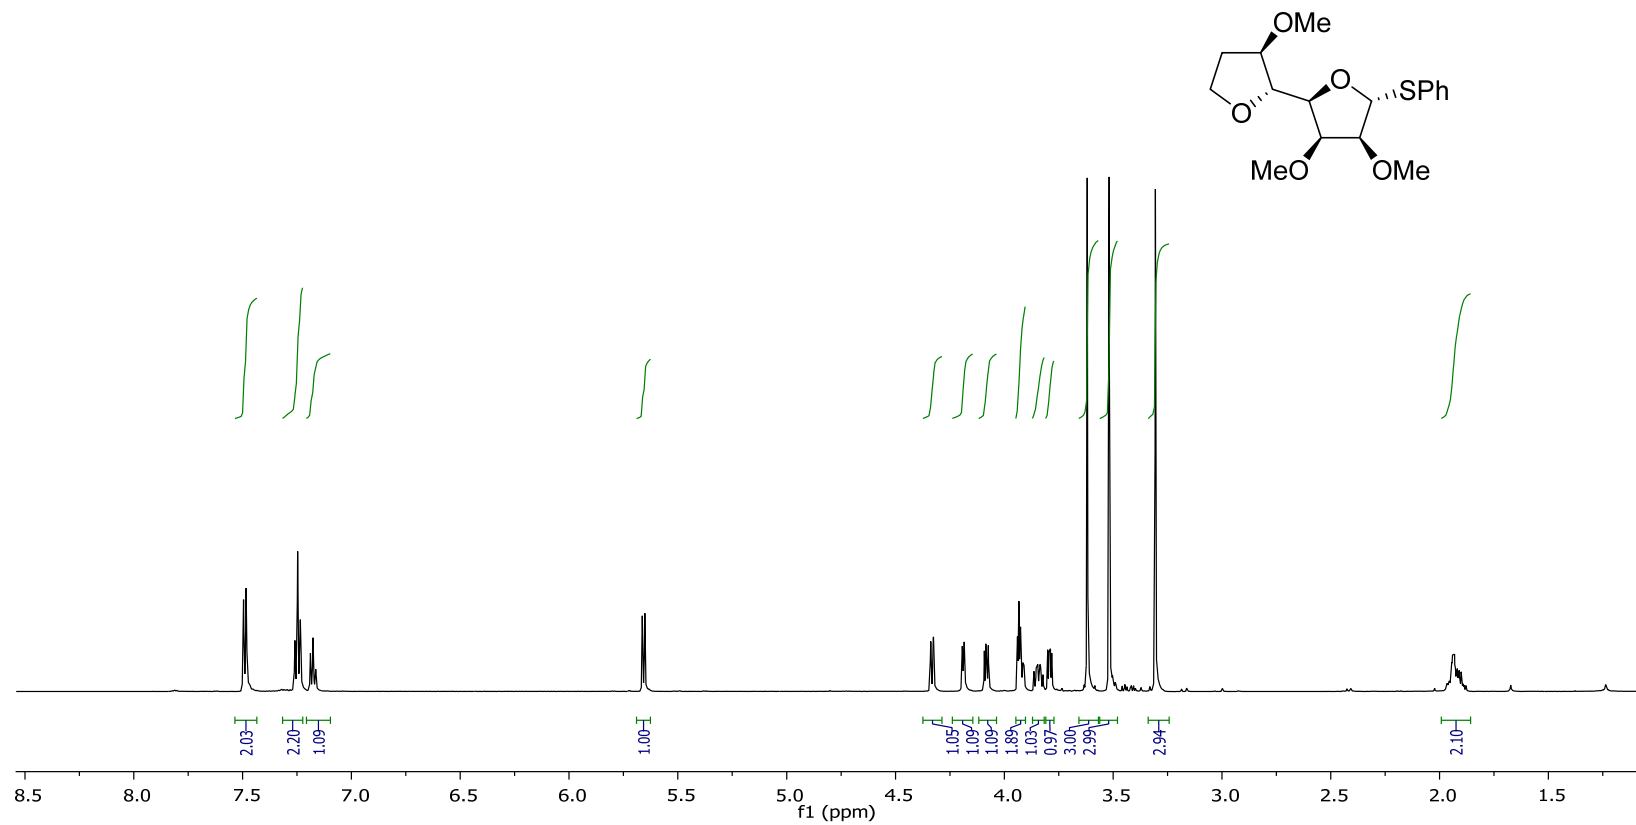

**$^{13}\text{C}$  NMR (150 MHz,  $\text{CDCl}_3$ ) of Phenyl 5,8-anhydro-7-deoxy-2,3,6-tri-*O*-methyl-D-glycero- $\alpha$ -D-thio-mannoctofuranoside (20)**

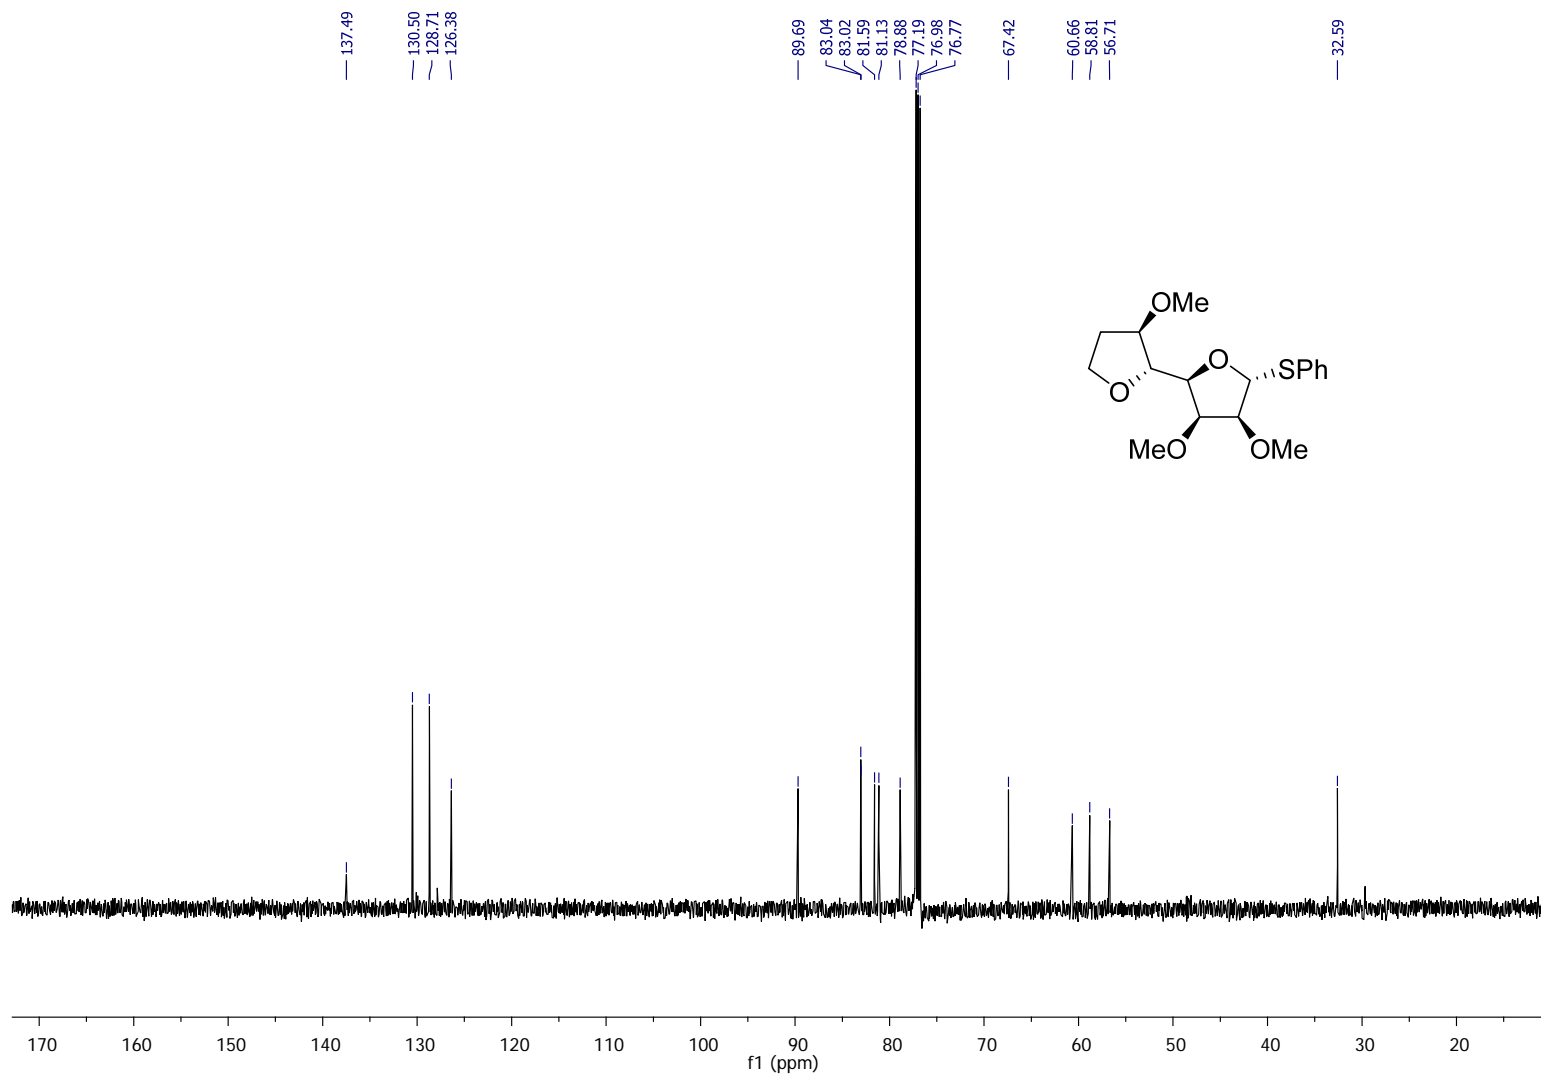

<sup>1</sup>H NMR (400 MHz, CDCl<sub>3</sub>) of Phenyl 7-deoxy-2,3,6-tri-*O*-methyl-L-glycero- $\alpha$ -D-thio-mannoctofuranoside (21)

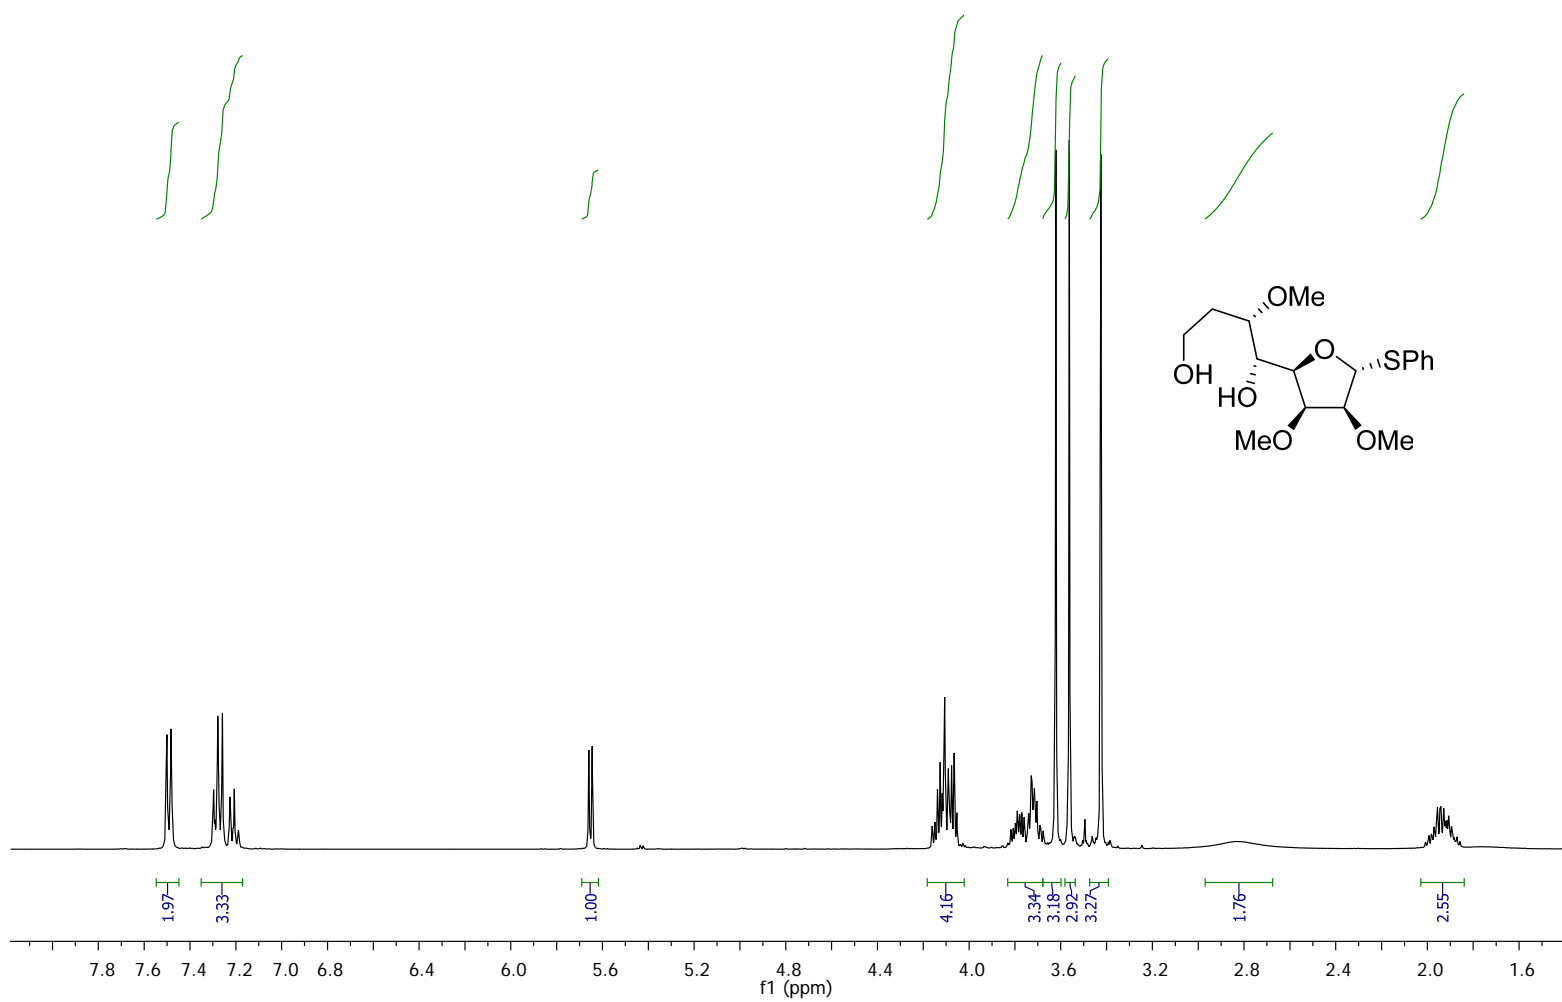

$^{13}\text{C}$  NMR (100 MHz,  $\text{CDCl}_3$ ) of Phenyl 7-deoxy-2,3,6-tri-*O*-methyl-L-glycero- $\alpha$ -D-thio-mannoctofuranoside (21)

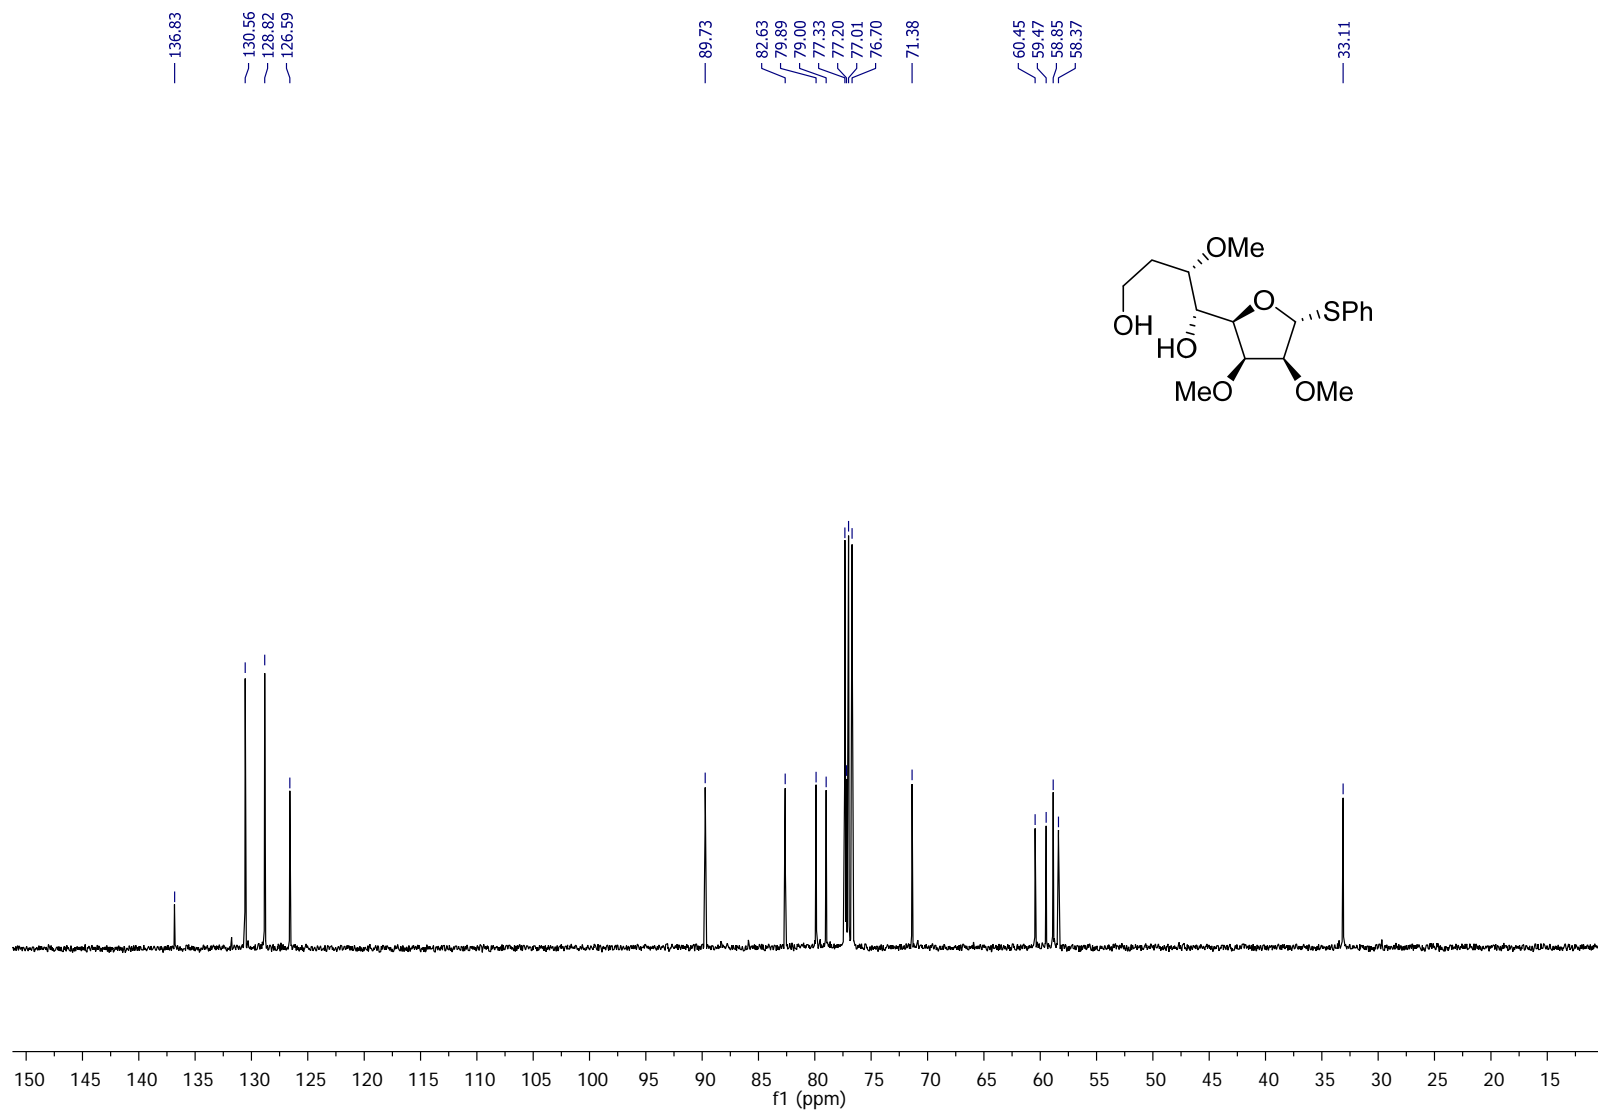



<sup>1</sup>H NMR (600 MHz, CDCl<sub>3</sub>) of Phenyl 5,8-anhydro-7-deoxy-2,3,6-tri-*O*-methyl-L-glycero- $\alpha$ -D-thio-mannoctofuranoside (22)

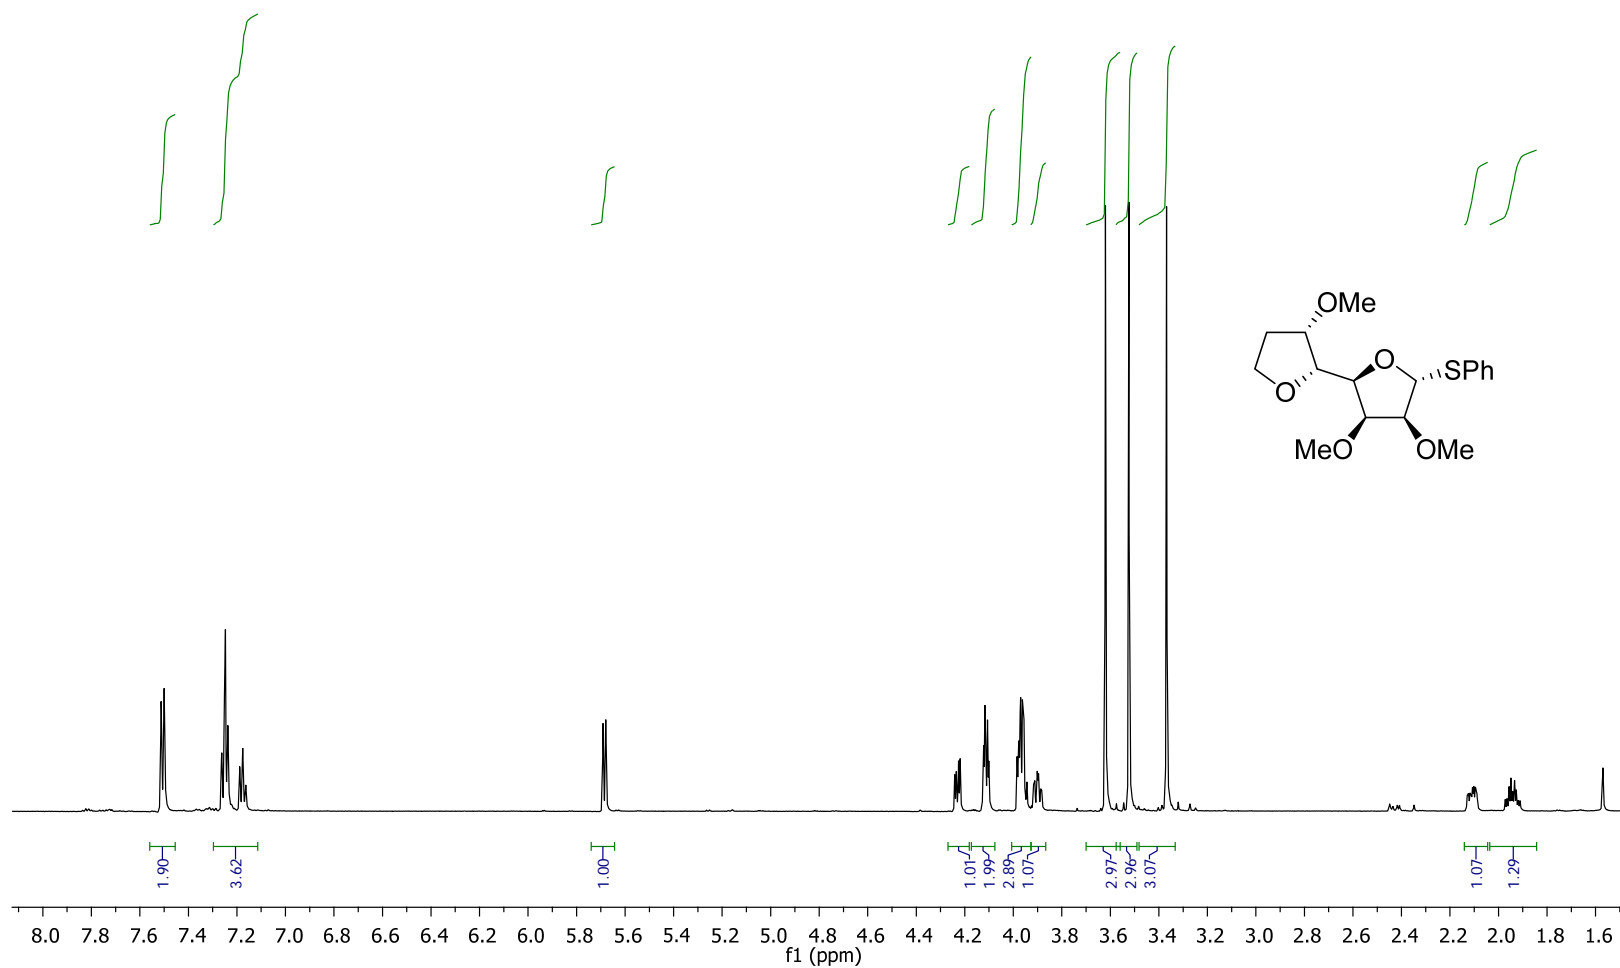

<sup>13</sup>C NMR (150 MHz, CDCl<sub>3</sub>) of Phenyl 5,8-anhydro-7-deoxy-2,3,6-tri-*O*-methyl-*L*-glycero- $\alpha$ -D-thio-mannoctofuranoside (22)

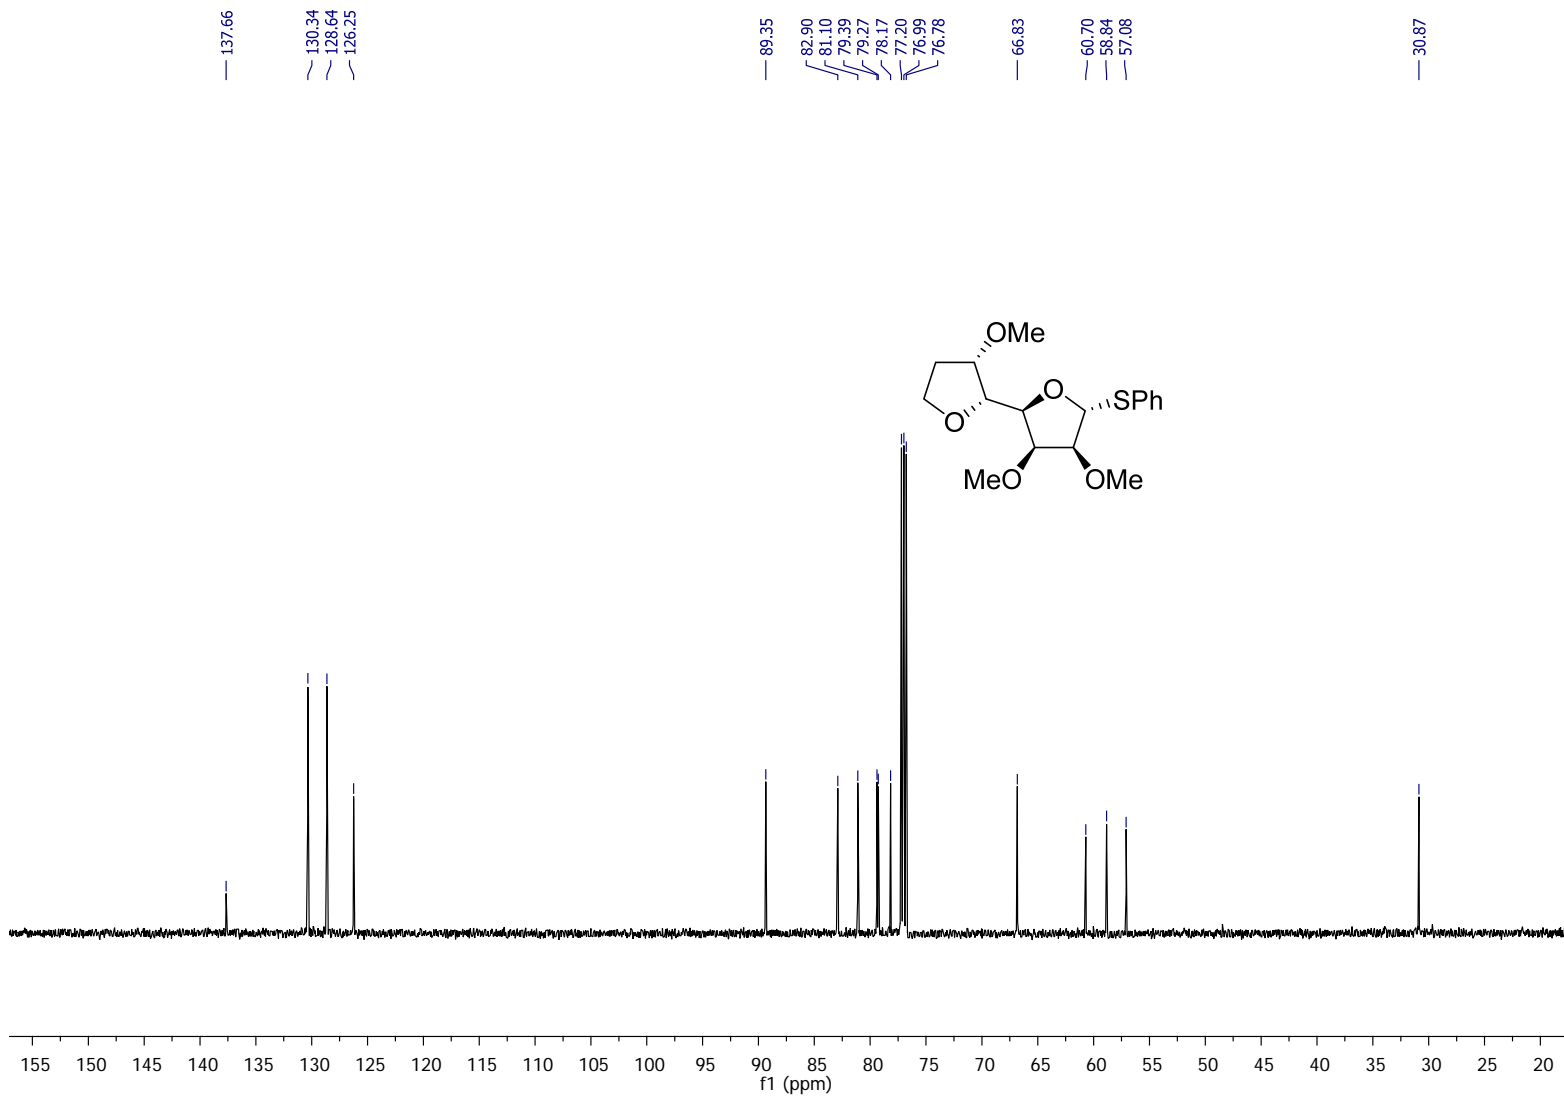

<sup>1</sup>H NMR (400 MHz, CDCl<sub>3</sub>) of Phenyl 7-deoxy-2,3,6-tri-*O*-methyl-*D*-glycero- $\alpha$ -*D*-thio-mannoctopyranoside (23)

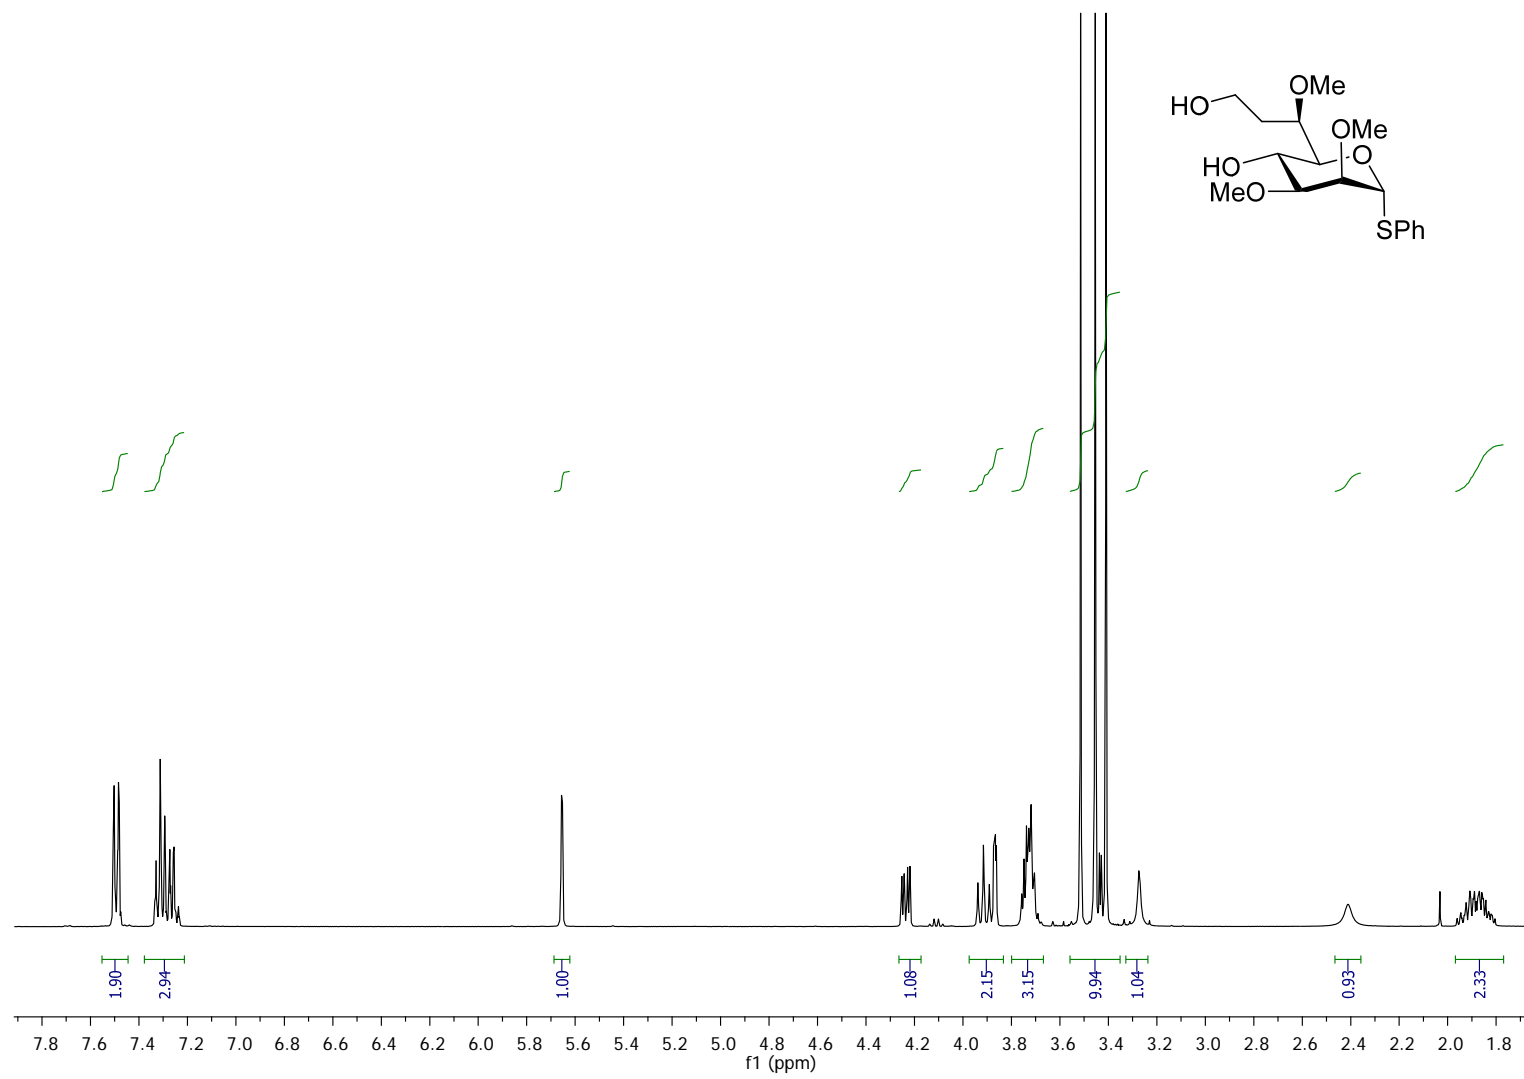

$^{13}\text{C}$  NMR (100 MHz,  $\text{CDCl}_3$ ) of Phenyl 7-deoxy-2,3,6-tri-*O*-methyl-D-glycero- $\alpha$ -D-thio-mannoctopyranoside (23)

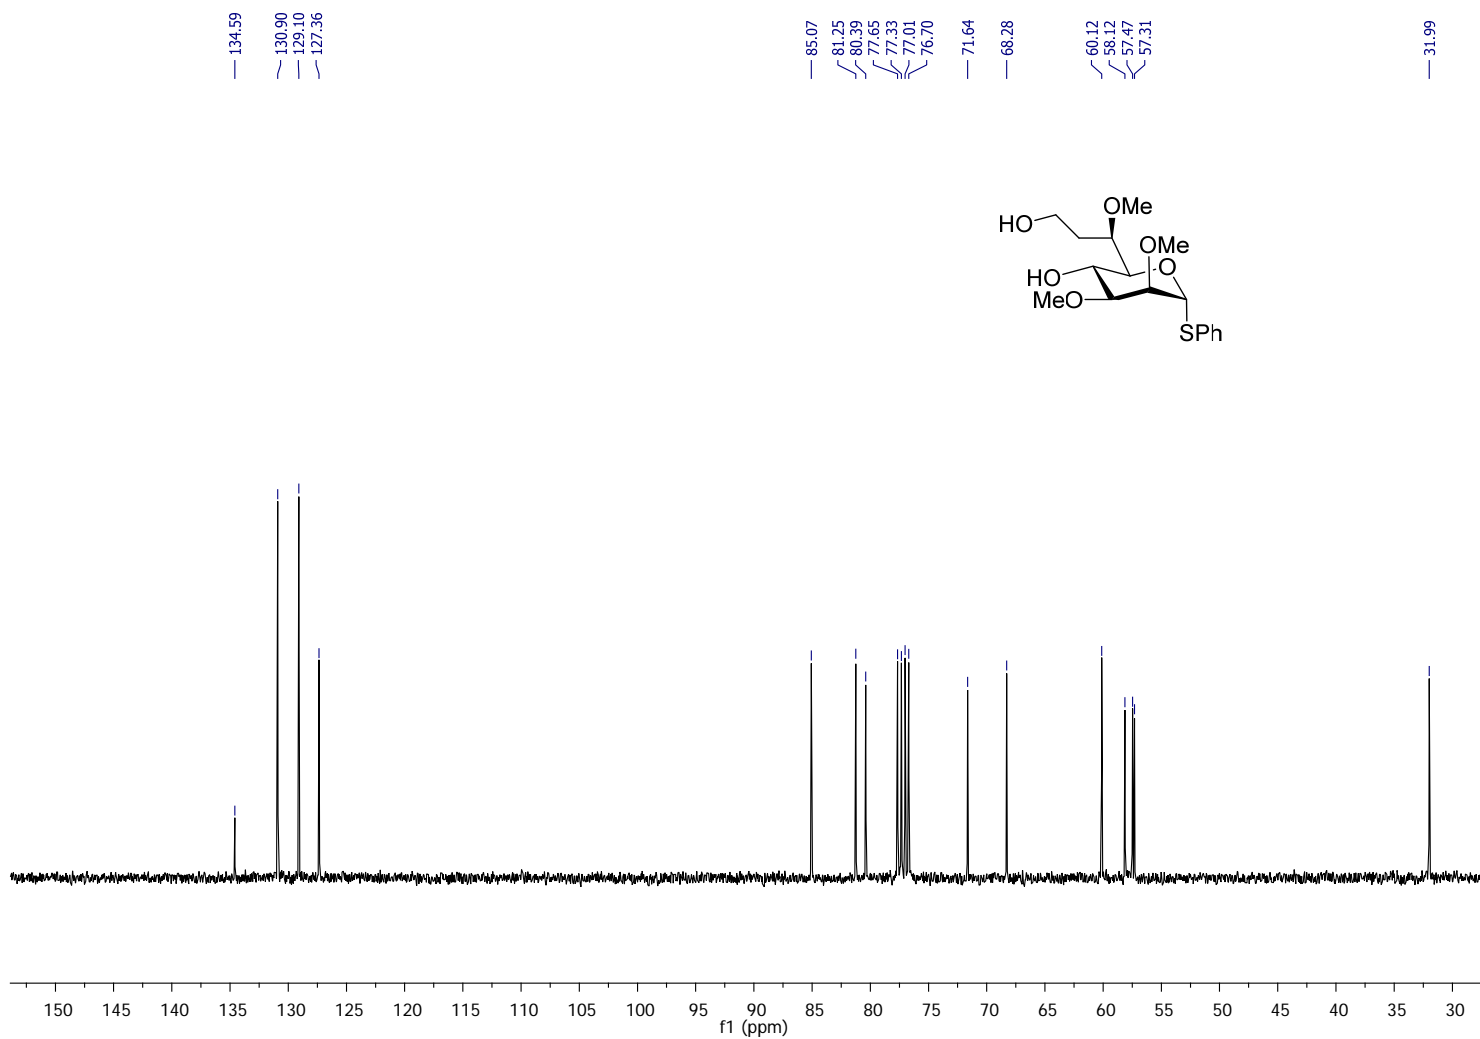

<sup>1</sup>H NMR (400 MHz, CDCl<sub>3</sub>) of Phenyl4,8-anhydro-7-deoxy-2,3,6-tri-*O*-methyl-*D*-glycero- $\alpha$ -*D*-thio-mannoctopyranoside (24)

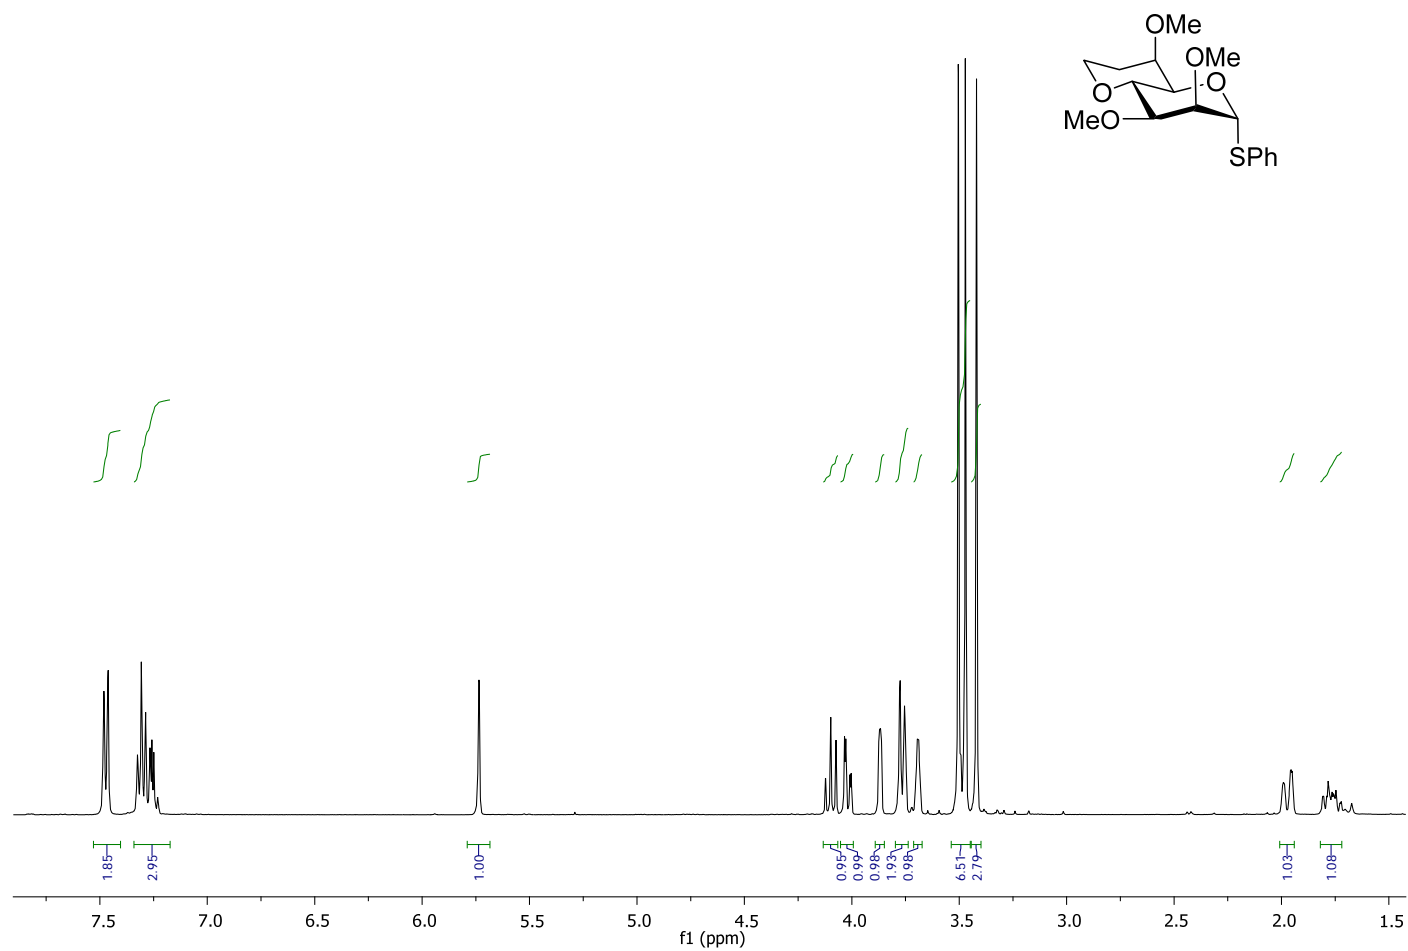

<sup>13</sup>C NMR (100 MHz, CDCl<sub>3</sub>) of Phenyl 4,8-anhydro-7-deoxy-2,3,6-tri-*O*-methyl-*D*-glycero- $\alpha$ -*D*-thio-mannoctopyranoside (24)

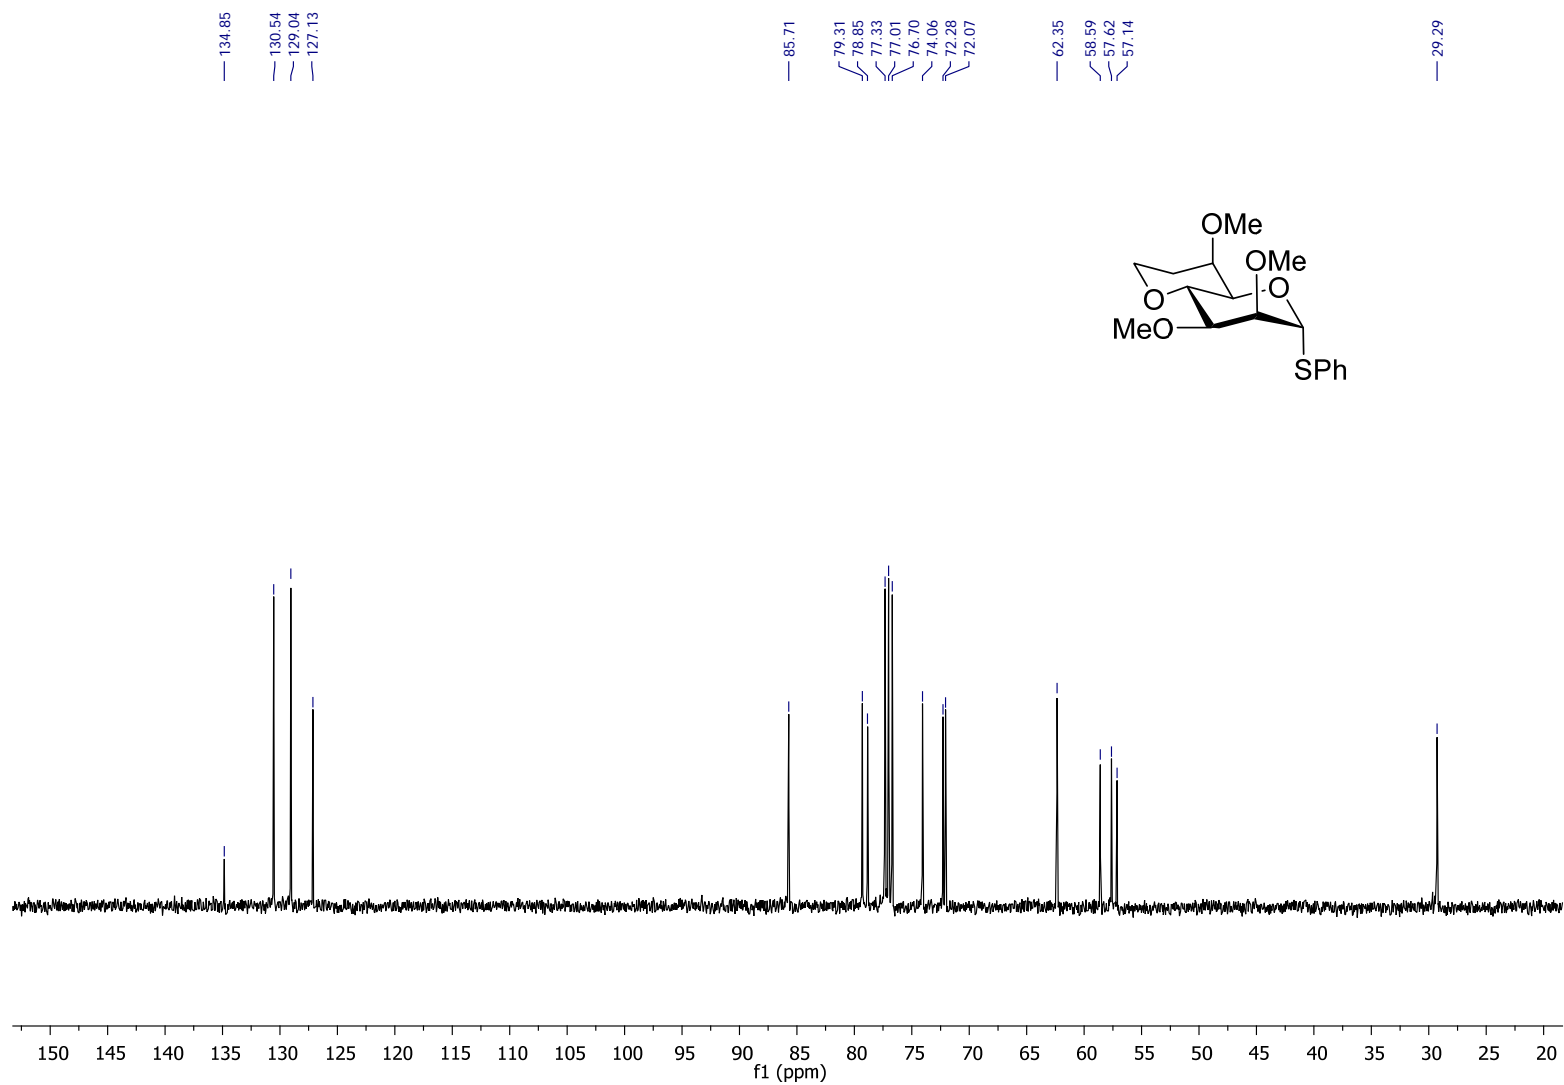

**<sup>1</sup>H NMR (400 MHz, CDCl<sub>3</sub>) of Phenyl 7-deoxy-2,3,6-tri-O-methyl-L-glycero- $\alpha$ -D-thio-mannoctopyranoside (25)**

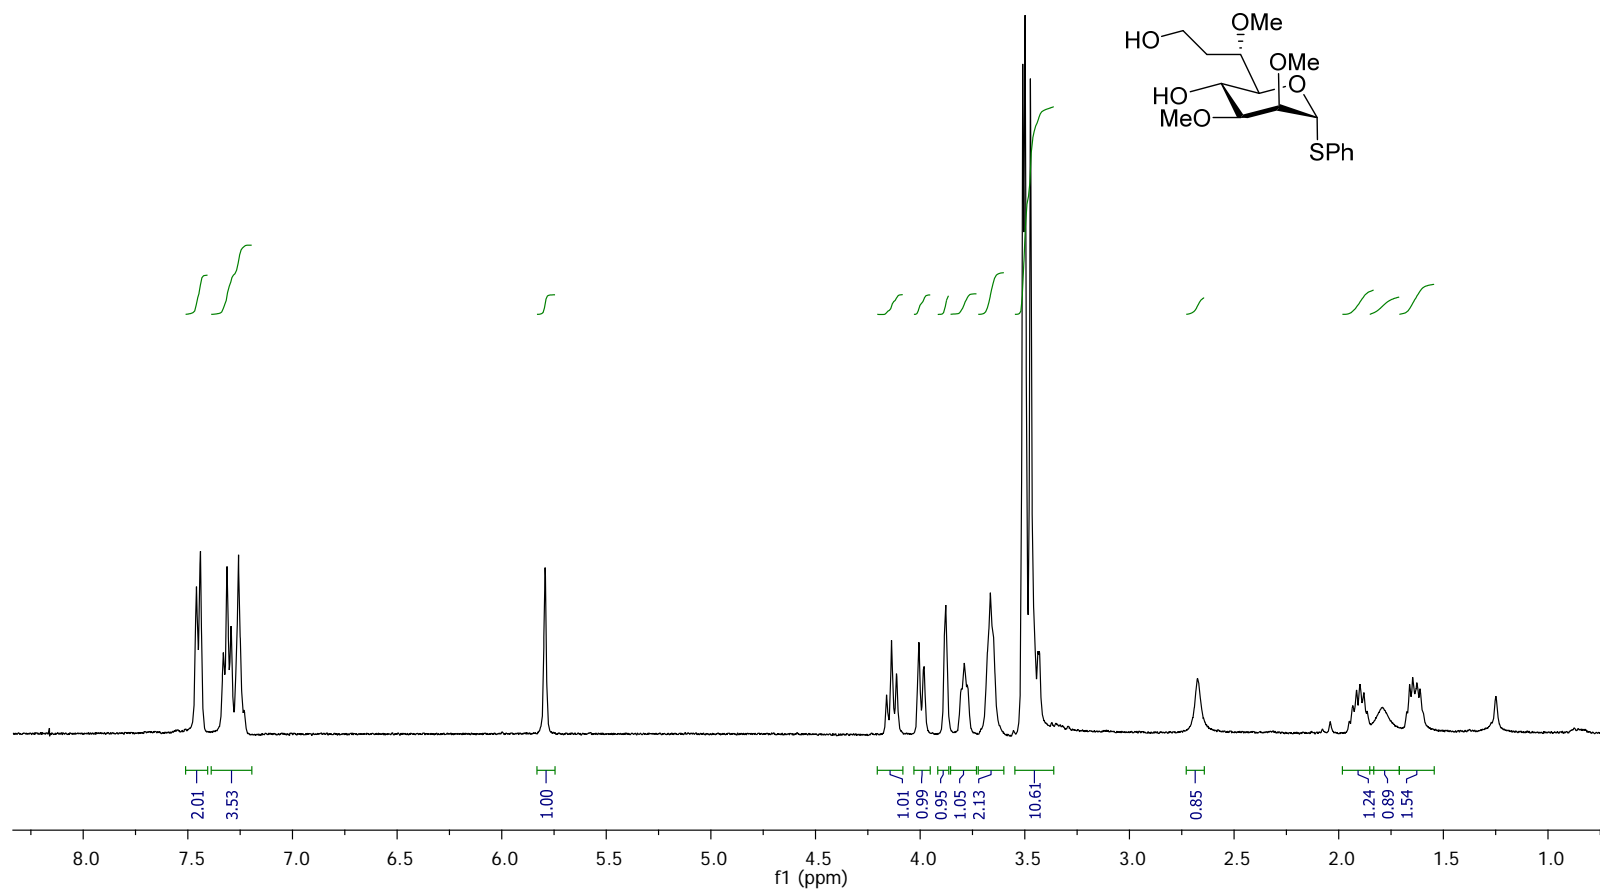

<sup>13</sup>C NMR (150 MHz, CDCl<sub>3</sub>) of Phenyl 7-deoxy-2,3,6-tri-O-methyl-L-glycero- $\alpha$ -D-thio-mannoctopyranoside (25)

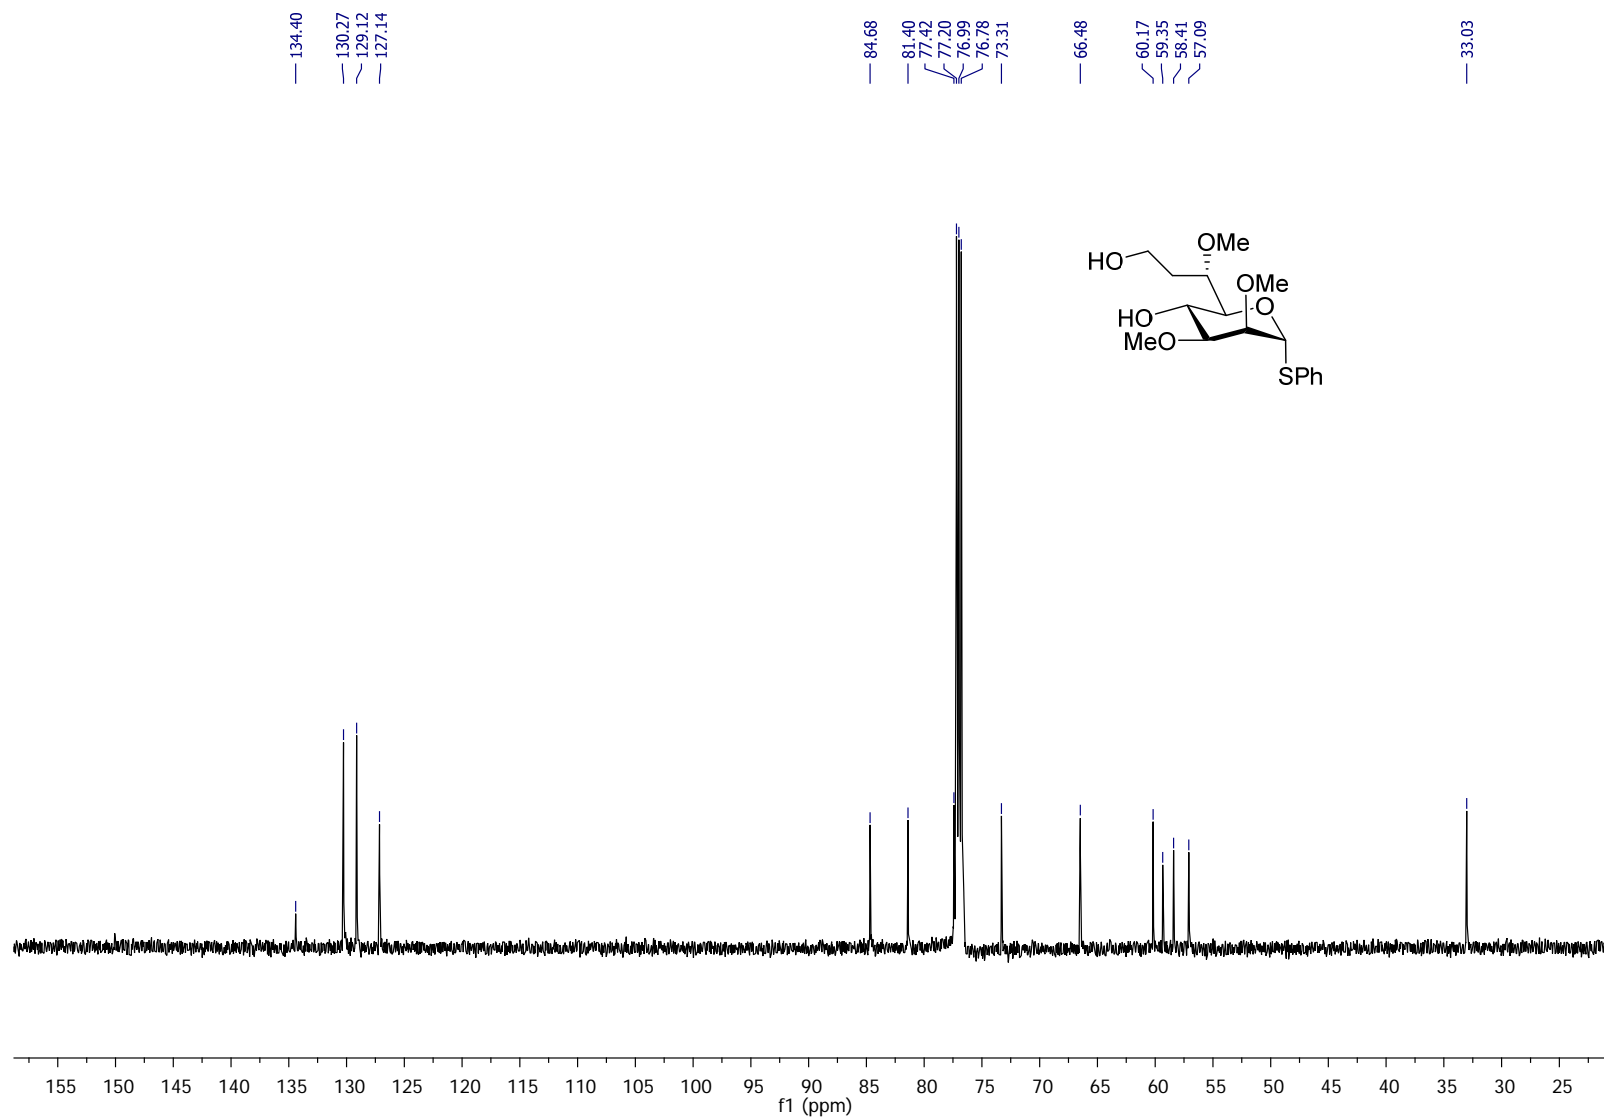



**<sup>1</sup>H NMR (400 MHz, CDCl<sub>3</sub>) of Phenyl 4,8-anhydro-7-deoxy-2,3,6-tri-*O*-methyl-L-glycero- $\alpha$ -D-thio-mannoctopyranoside (26)**

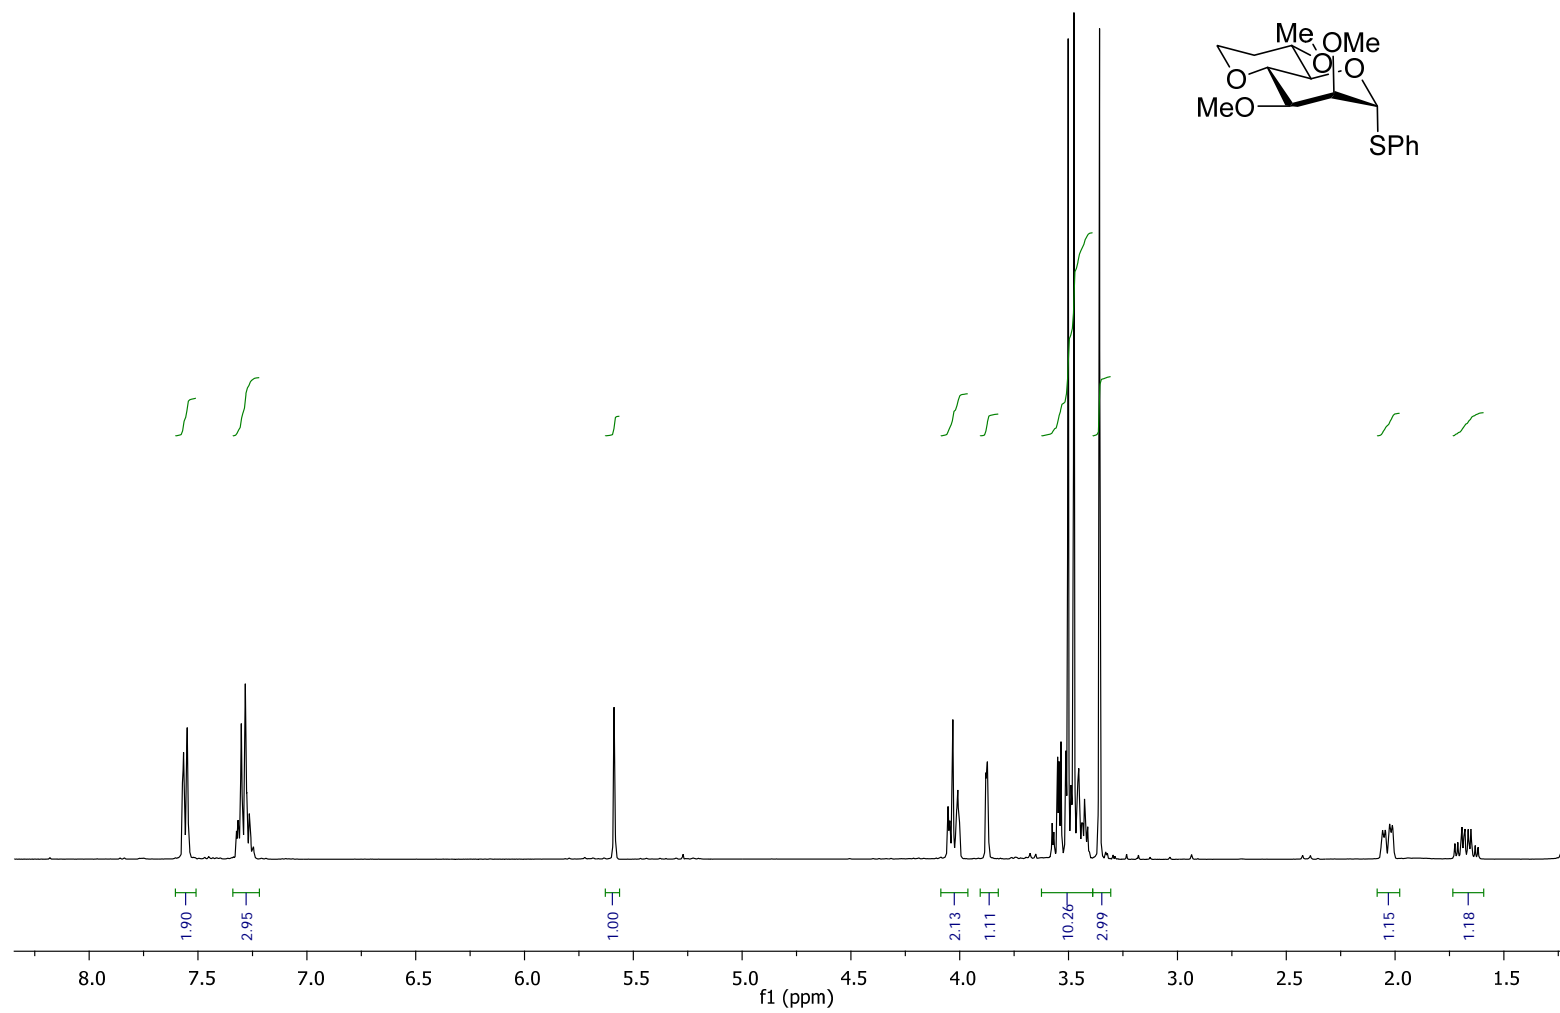

<sup>13</sup>C NMR (100 MHz, CDCl<sub>3</sub>) of Phenyl 4,8-anhydro-7-deoxy-2,3,6-tri-*O*-methyl-L-glycero- $\alpha$ -D-thio-mannoopyranoside (26)

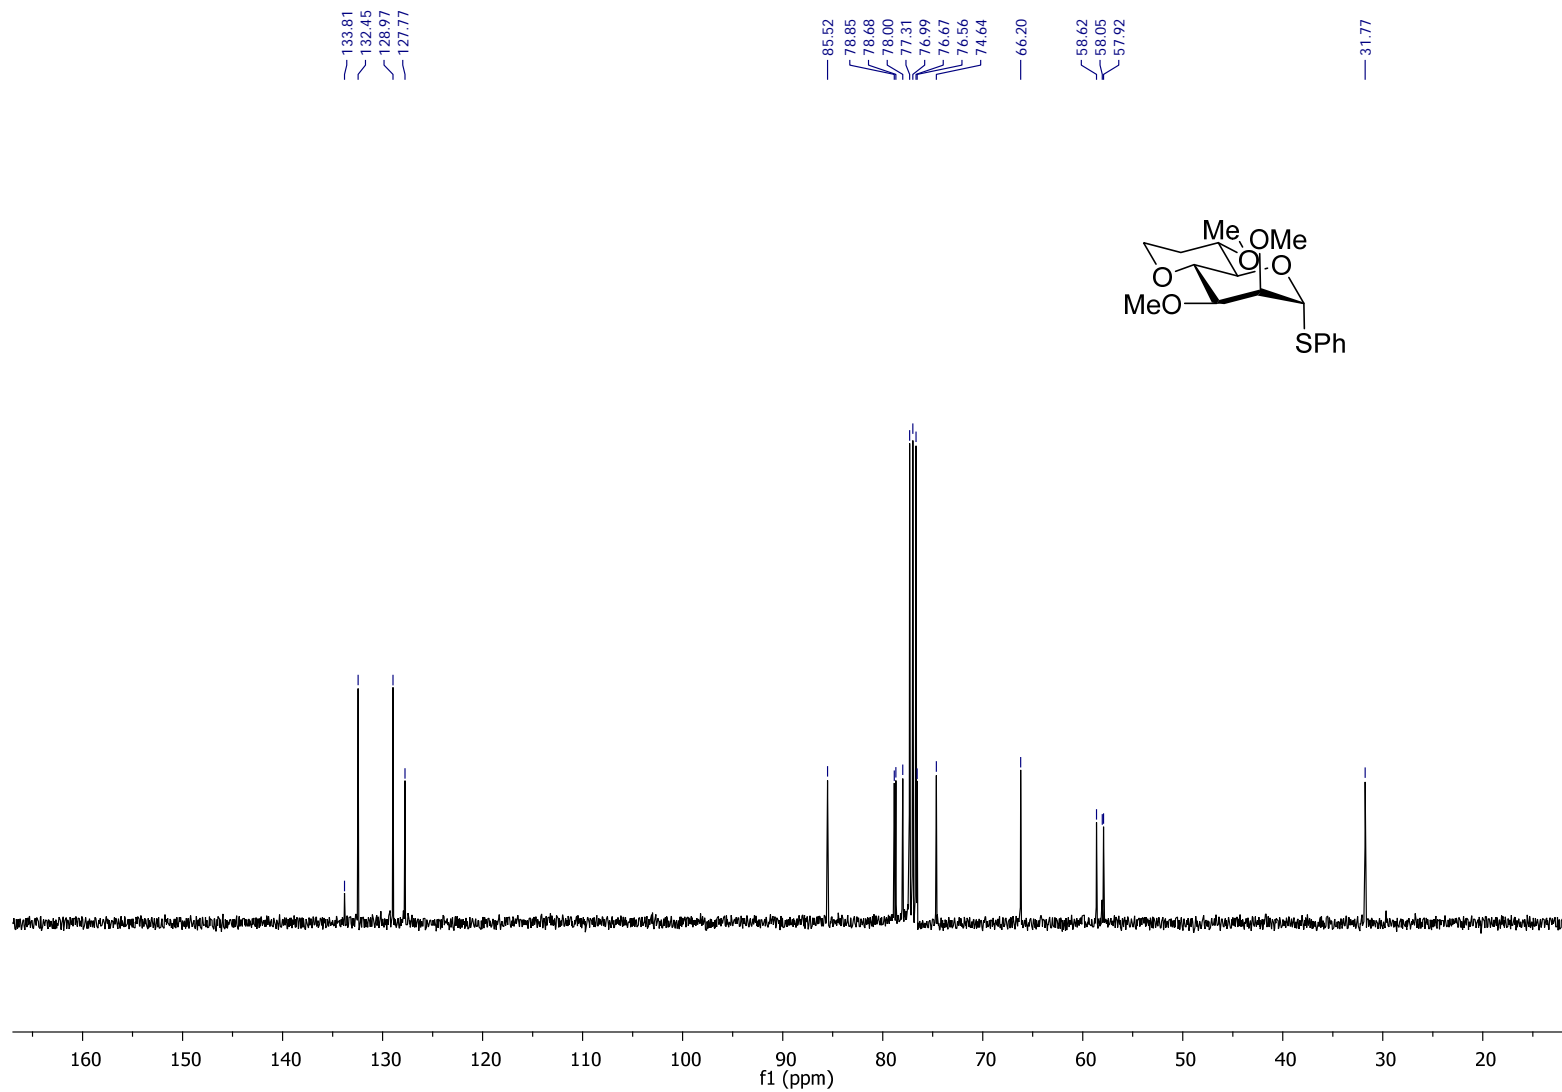

**<sup>1</sup>H NMR (400 MHz, CDCl<sub>3</sub>) of Phenyl 7-deoxy-2,3-di-O-methyl-4-O-(p-methoxybenzyl)-D-glycero- $\alpha$ -D-thio-mannoheptopyranoside (27)**

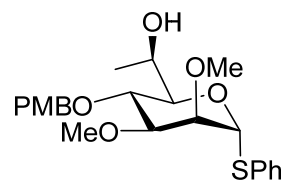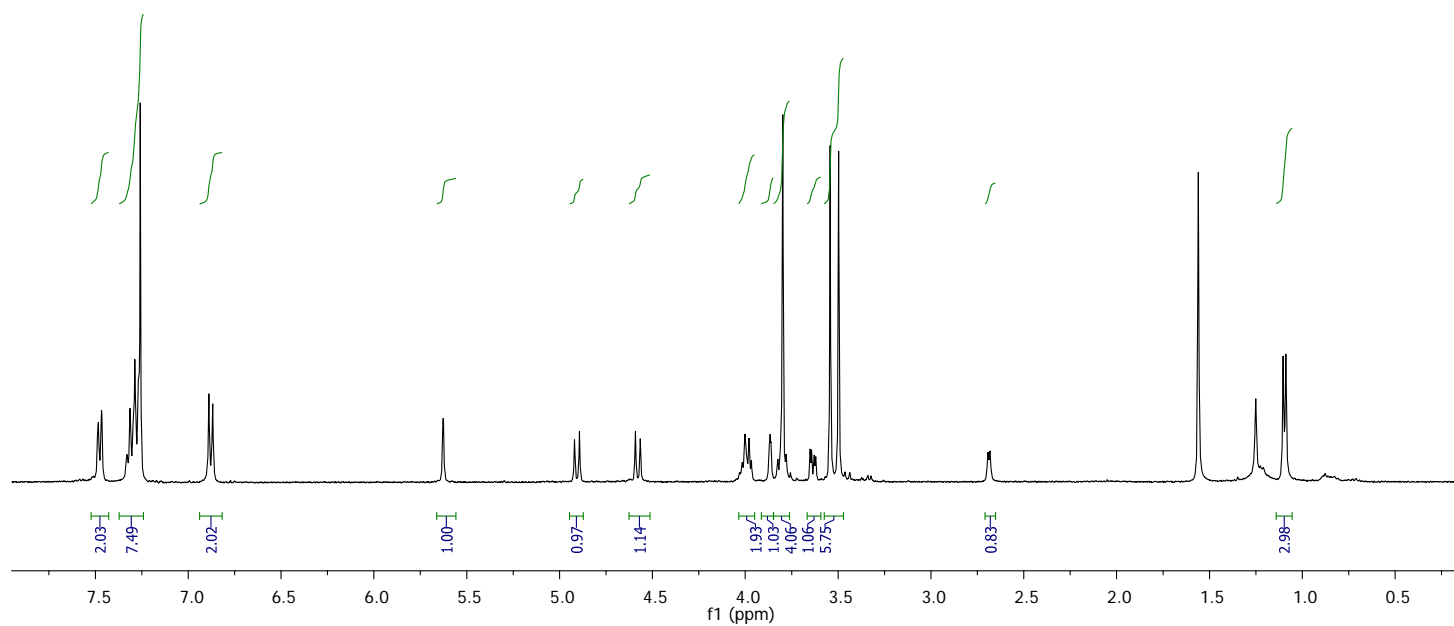

**$^{13}\text{C}$  NMR (100 MHz,  $\text{CDCl}_3$ ) of Phenyl 7-deoxy-2,3-di-*O*-methyl-4-*O*-(*p*-methoxybenzyl)-*D*-glycero- $\alpha$ -*D*-thio-  
mannoheptopyranoside (27)**

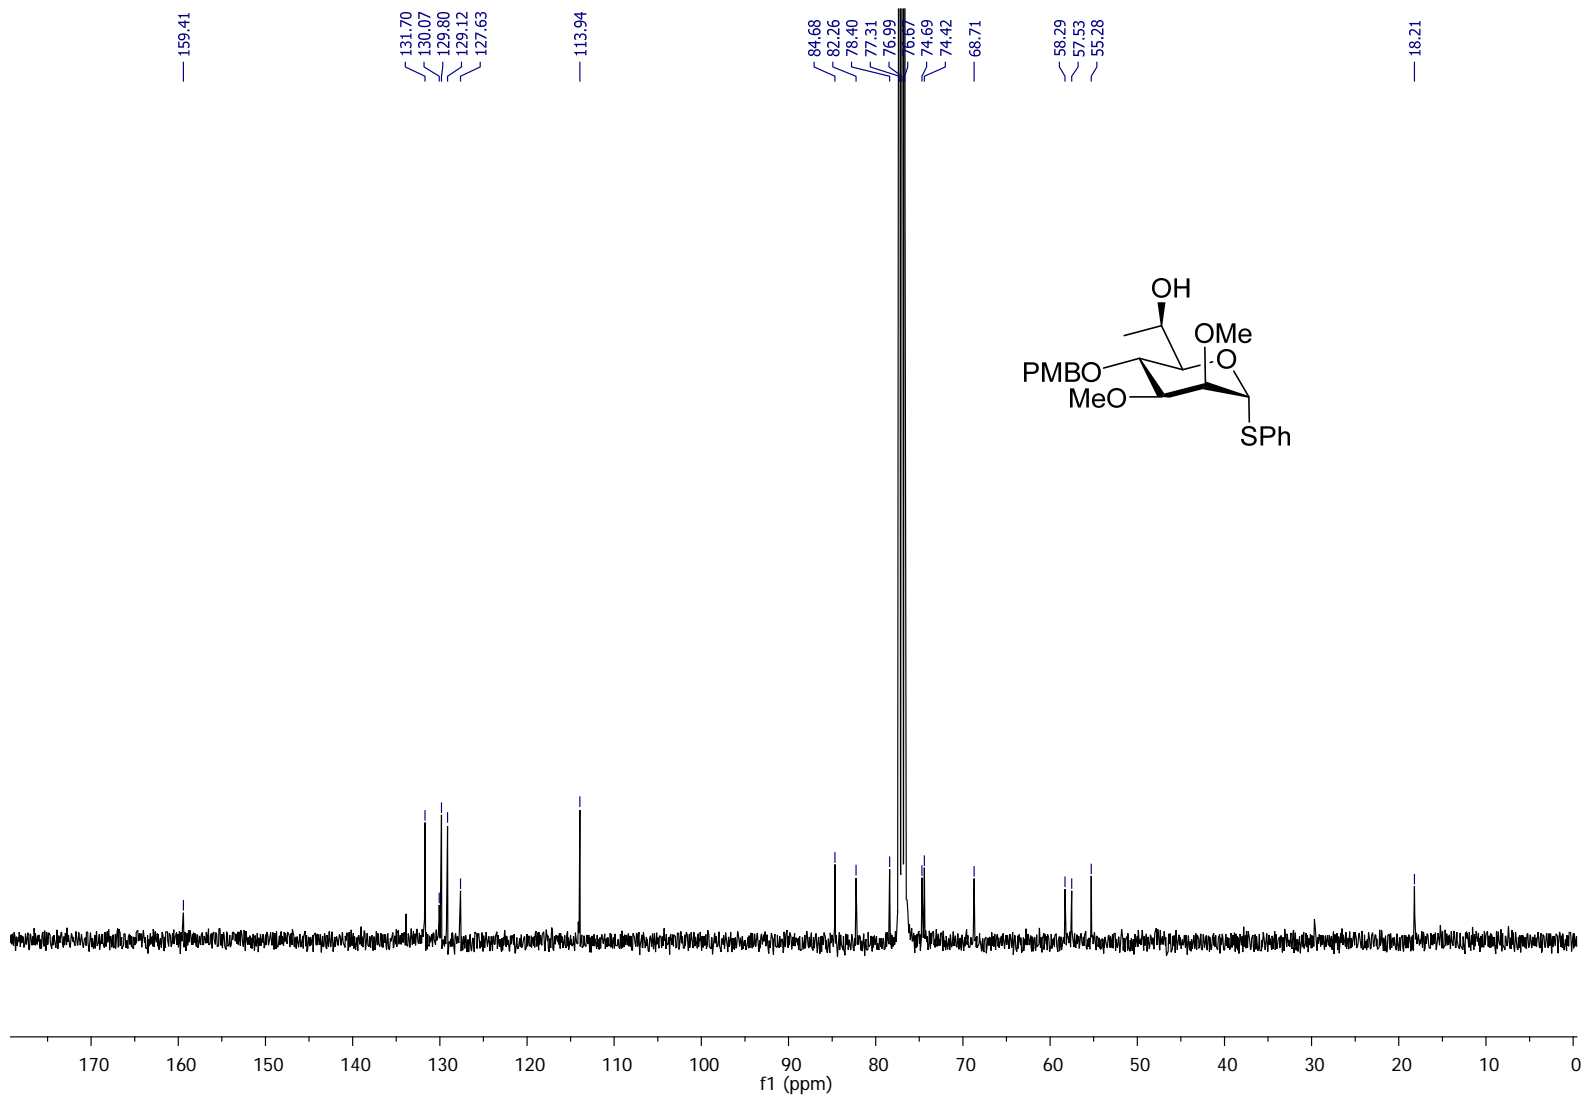

**<sup>1</sup>H NMR (400 MHz, CDCl<sub>3</sub>) of Phenyl 7-deoxy-2,3-di-O-methyl-4-O-(*p*-methoxybenzyl)-L-glycero- $\alpha$ -D-thio-  
mannoheptopyranoside (28)**

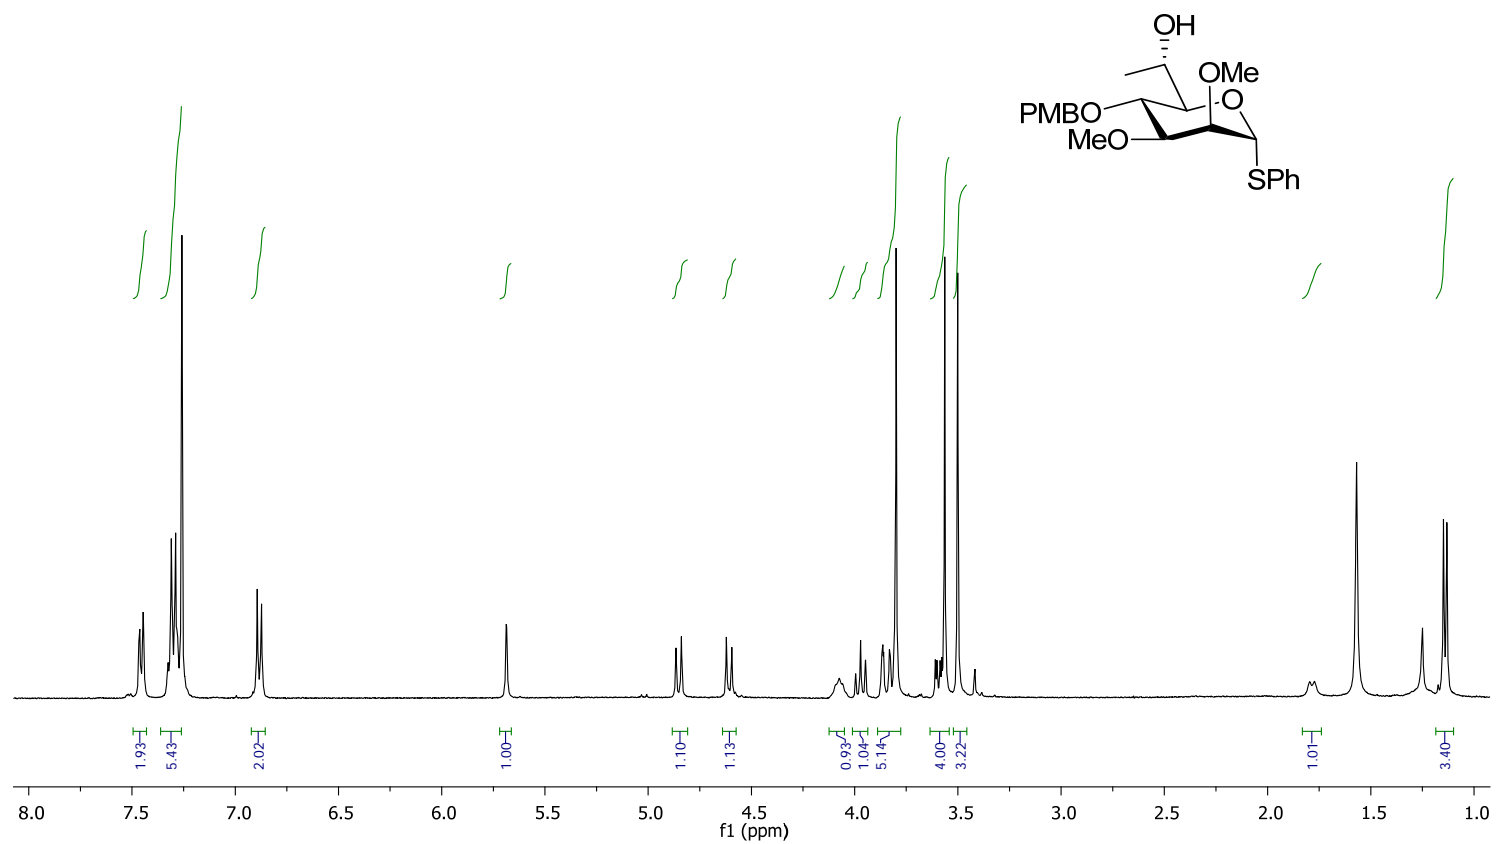

**$^1\text{H}$  NMR (100 MHz,  $\text{CDCl}_3$ ) of Phenyl 7-deoxy-2,3-di-*O*-methyl-4-*O*-(*p*-methoxybenzyl)-*L*-glycero- $\alpha$ -D-thio-*manno*heptopyranoside (28)**

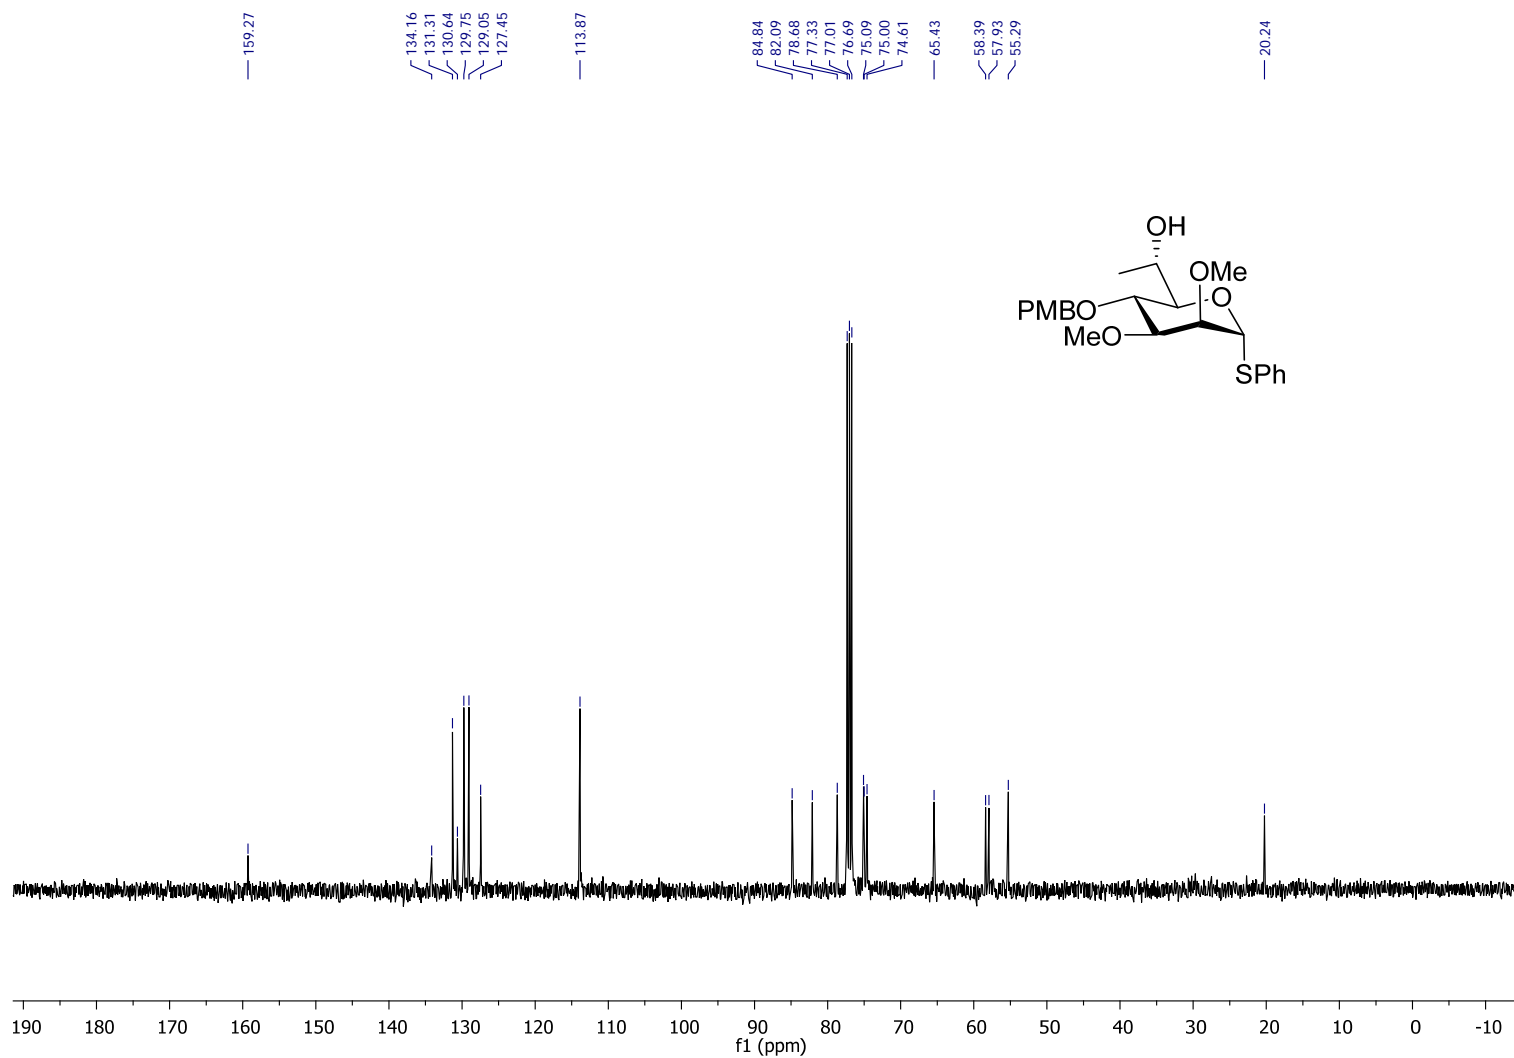

**<sup>1</sup>H NMR (400 MHz, CDCl<sub>3</sub>) of Phenyl 2,3-di-*O*-methyl-4-*O*-(*p*-methoxybenzyl)-6-*O*-(*p*-nitrobenzoyl)-*D*-glycero- $\alpha$ -*D*-thio-*manno*heptopyranoside (29)**

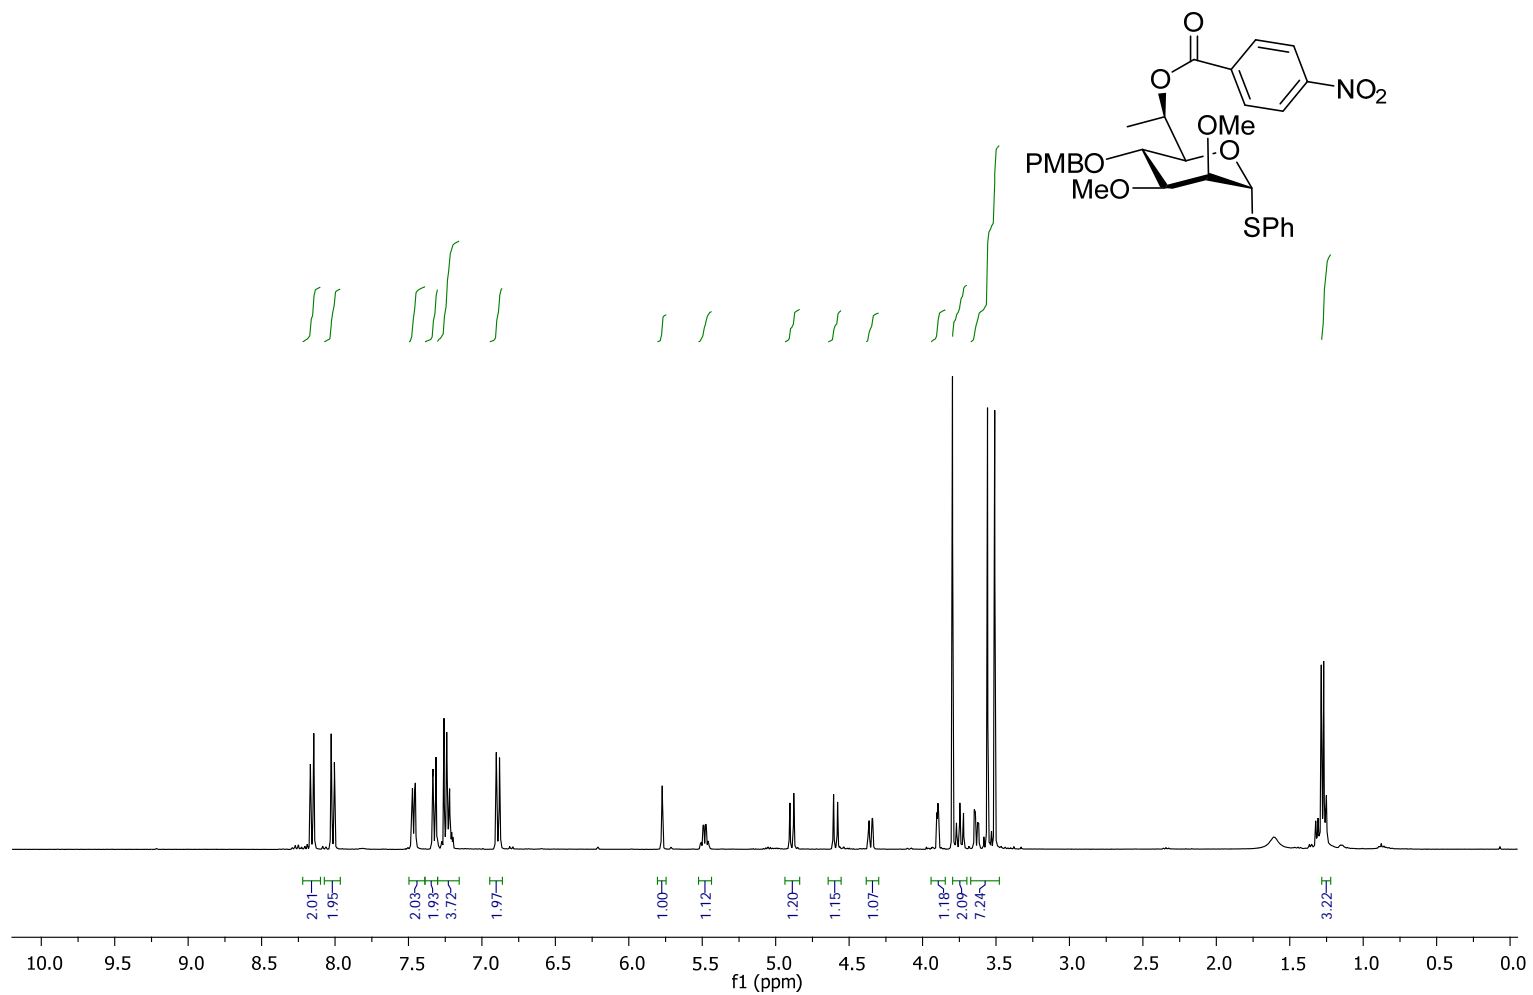

**$^{13}\text{C}$  NMR (100 MHz,  $\text{CDCl}_3$ ) of Phenyl 2,3-di-*O*-methyl-4-*O*-(*p*-methoxybenzyl)-6-*O*-(*p*-nitrobenzoyl)- $\alpha$ -D-thio-*manno*heptopyranoside (29)**

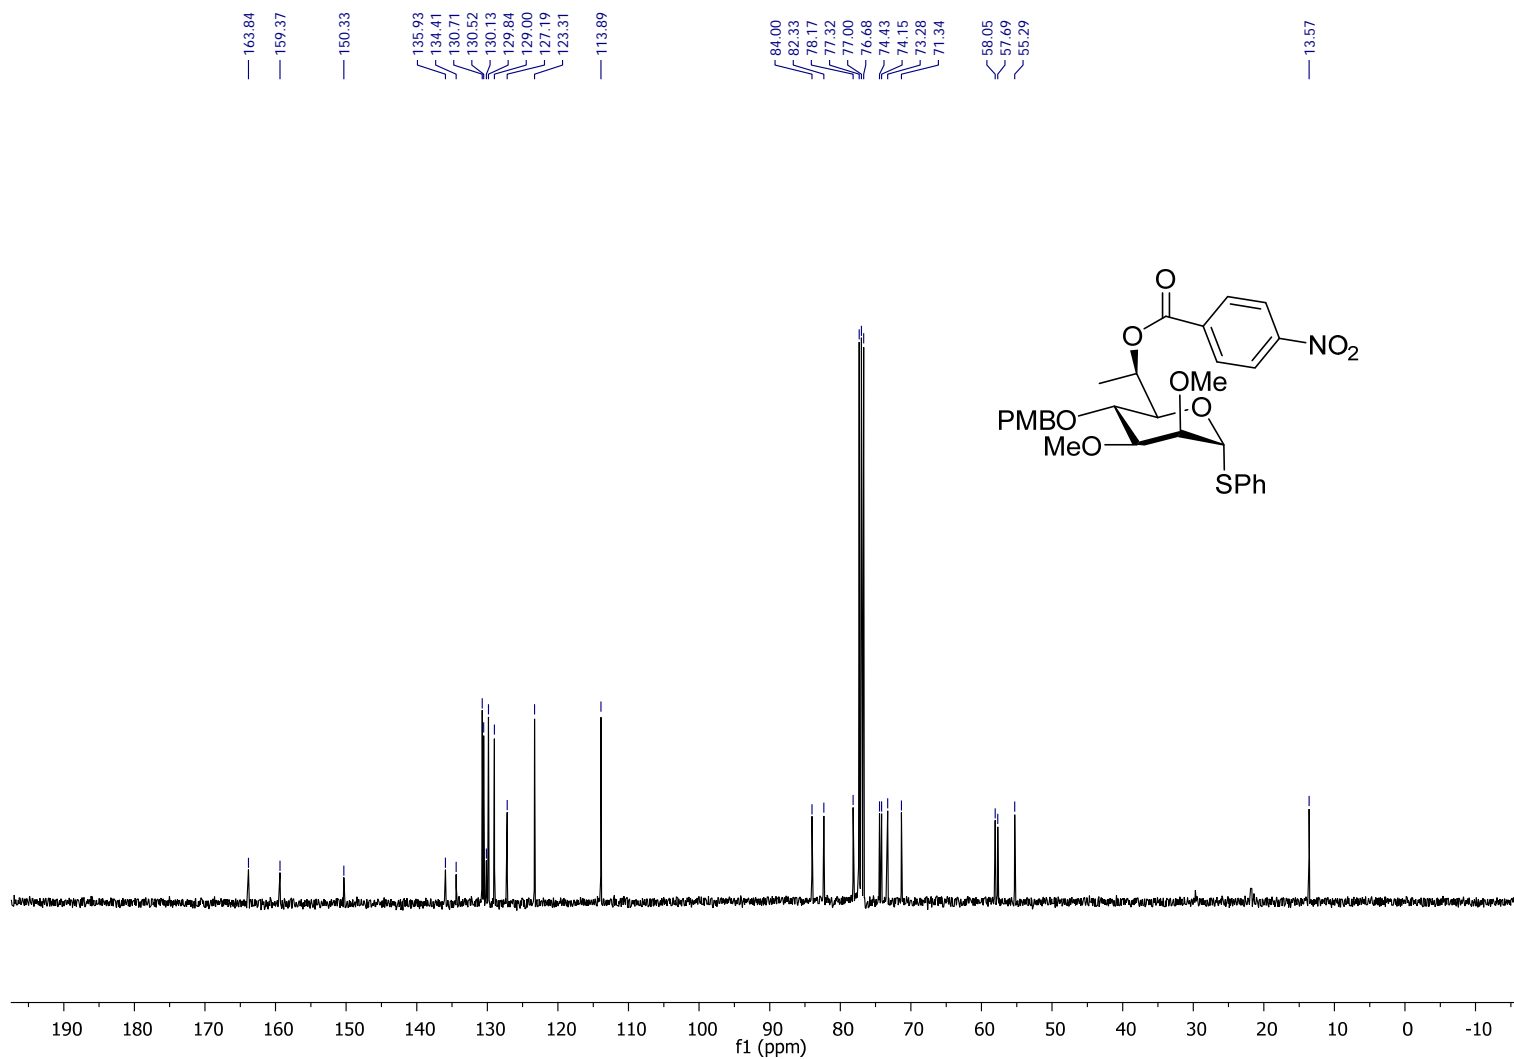



**<sup>1</sup>H NMR (400 MHz, CDCl<sub>3</sub>) of Phenyl 2,3-di-O-methyl-4,6-O-(p-methoxybenzylidene)-D-glycero- $\alpha$ -D-thio-  
mannoheptopyranoside (30)**

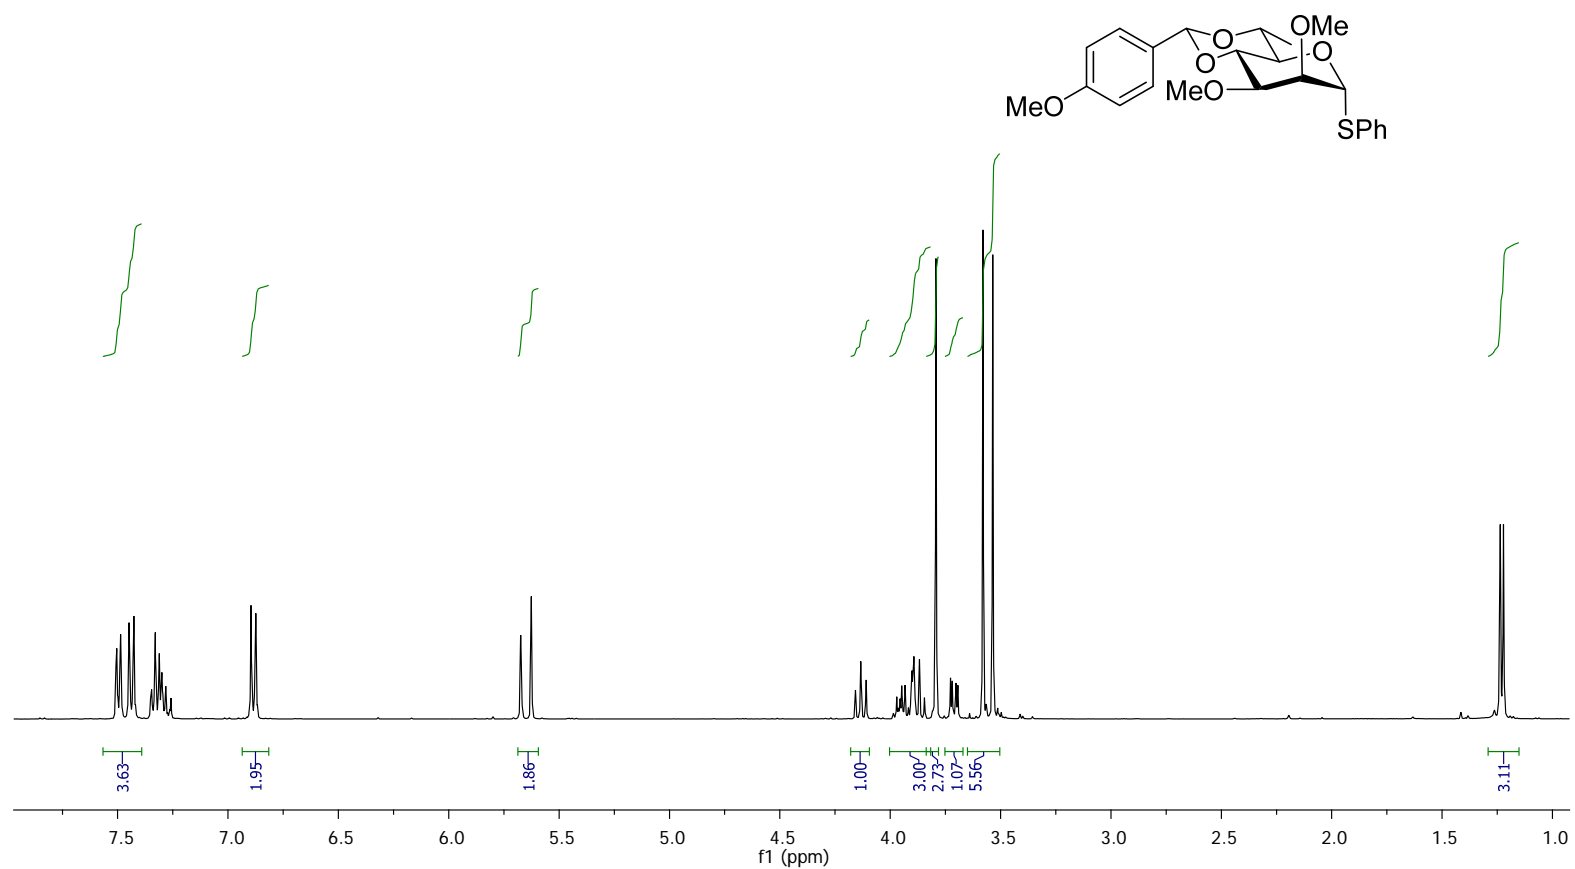

**$^{13}\text{C}$  NMR (100 MHz,  $\text{CDCl}_3$ ) of Phenyl 2,3-di-*O*-methyl-4,6-*O*-(*p*-methoxybenzylidene)-*D*-glycero- $\alpha$ -*D*-thio-*manno*heptopyranoside (30)**

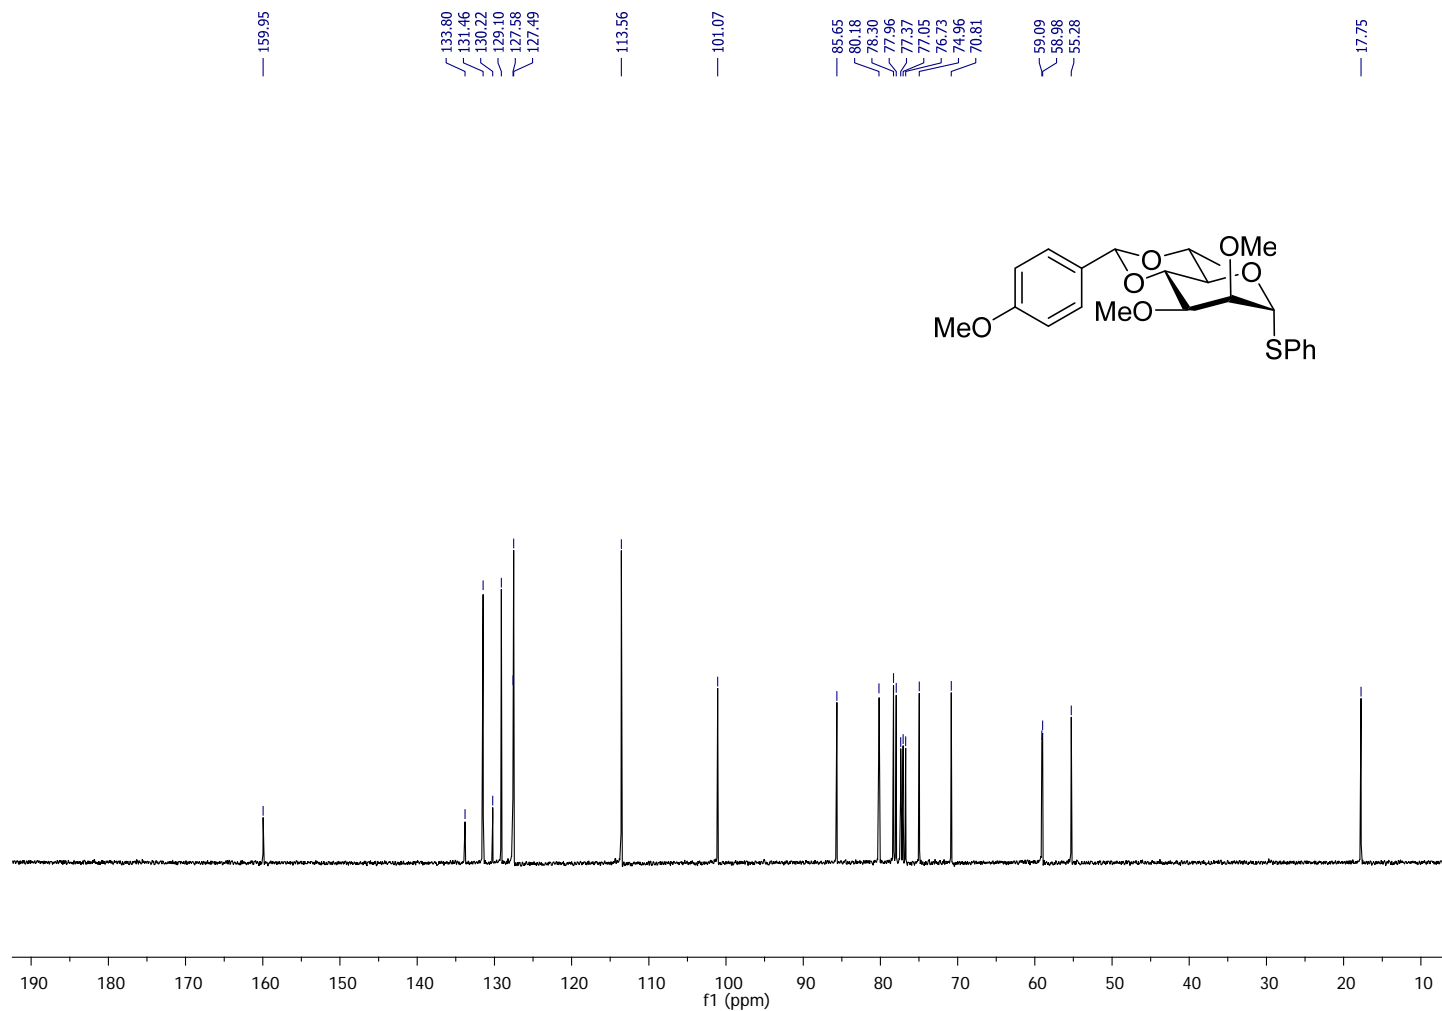

**<sup>1</sup>H NMR (400 MHz, CDCl<sub>3</sub>) of Phenyl 2,3-di-O-methyl-4,6-O-(p-methoxybenzylidene)-L-glycero- $\alpha$ -D-thio-  
mannoheptopyranoside (31)**

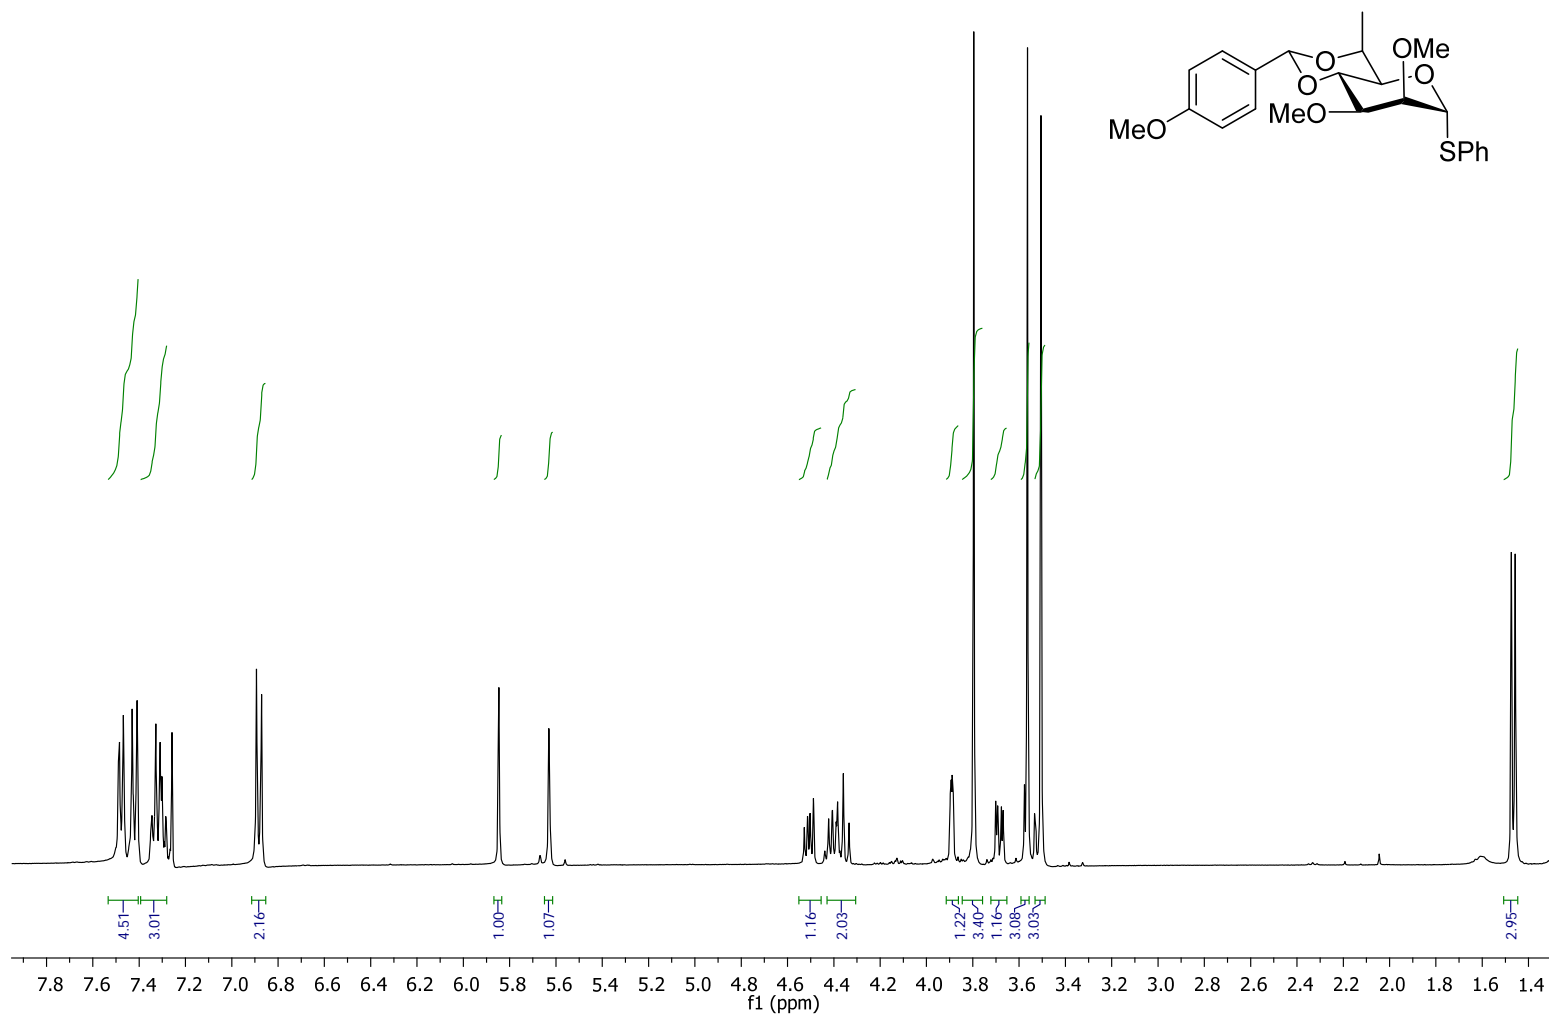

**$^{13}\text{C}$  NMR (100 MHz,  $\text{CDCl}_3$ ) of Phenyl 2,3-di-*O*-methyl-4,6-*O*-(*p*-methoxybenzylidene)-*L*-glycero- $\alpha$ -D-thio-*manno*heptopyranoside (31)**

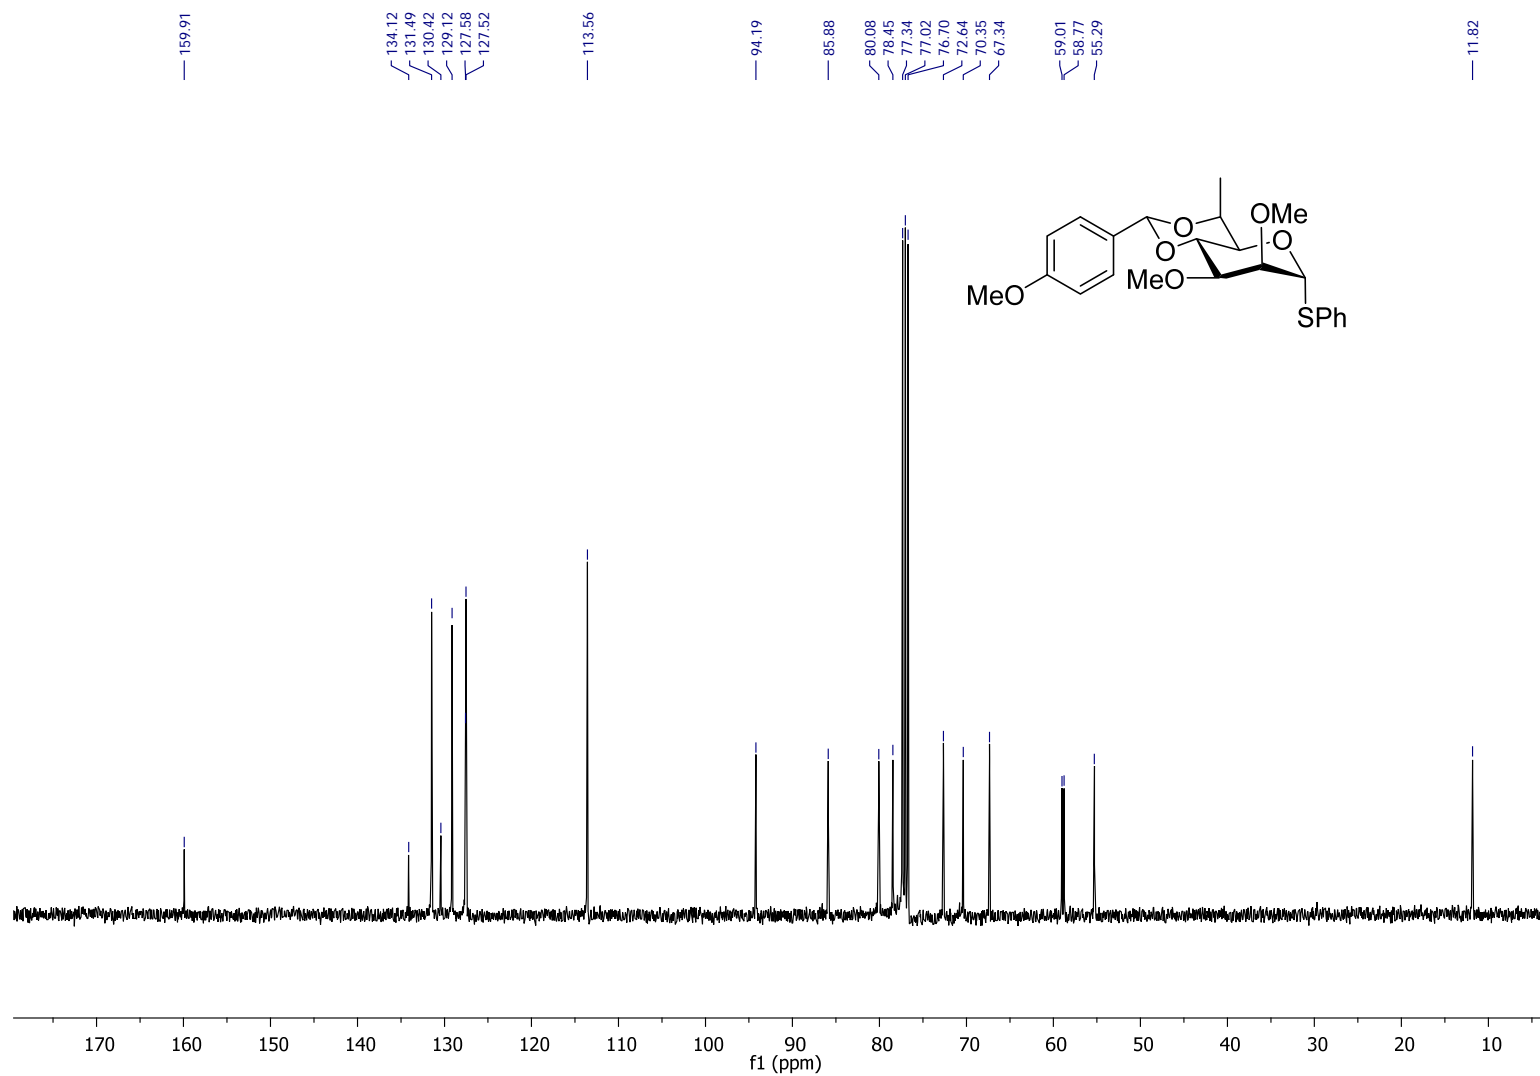

**<sup>1</sup>H NMR (400 MHz, CDCl<sub>3</sub>) of Phenyl 7-deoxy-2,3-di-O-methyl-D-glycero- $\alpha$ -D-thio-mannoheptopyranoside (32)**

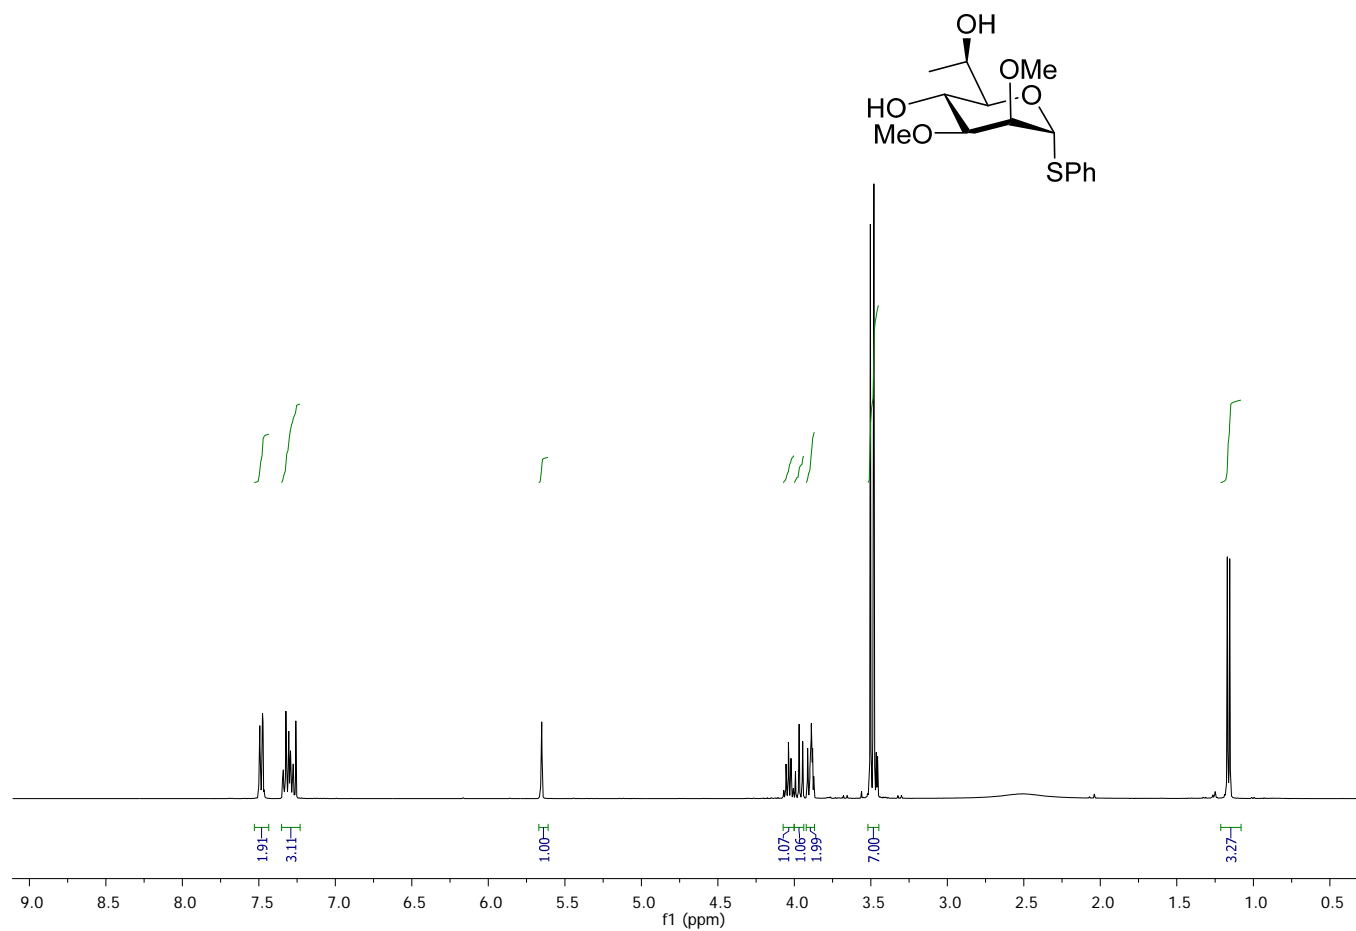

<sup>13</sup>C NMR (100 MHz, CDCl<sub>3</sub>) of Phenyl 7-deoxy-2,3-di-O-methyl-D-glycero- $\alpha$ -D-thio-mannoheptopyranoside (32)

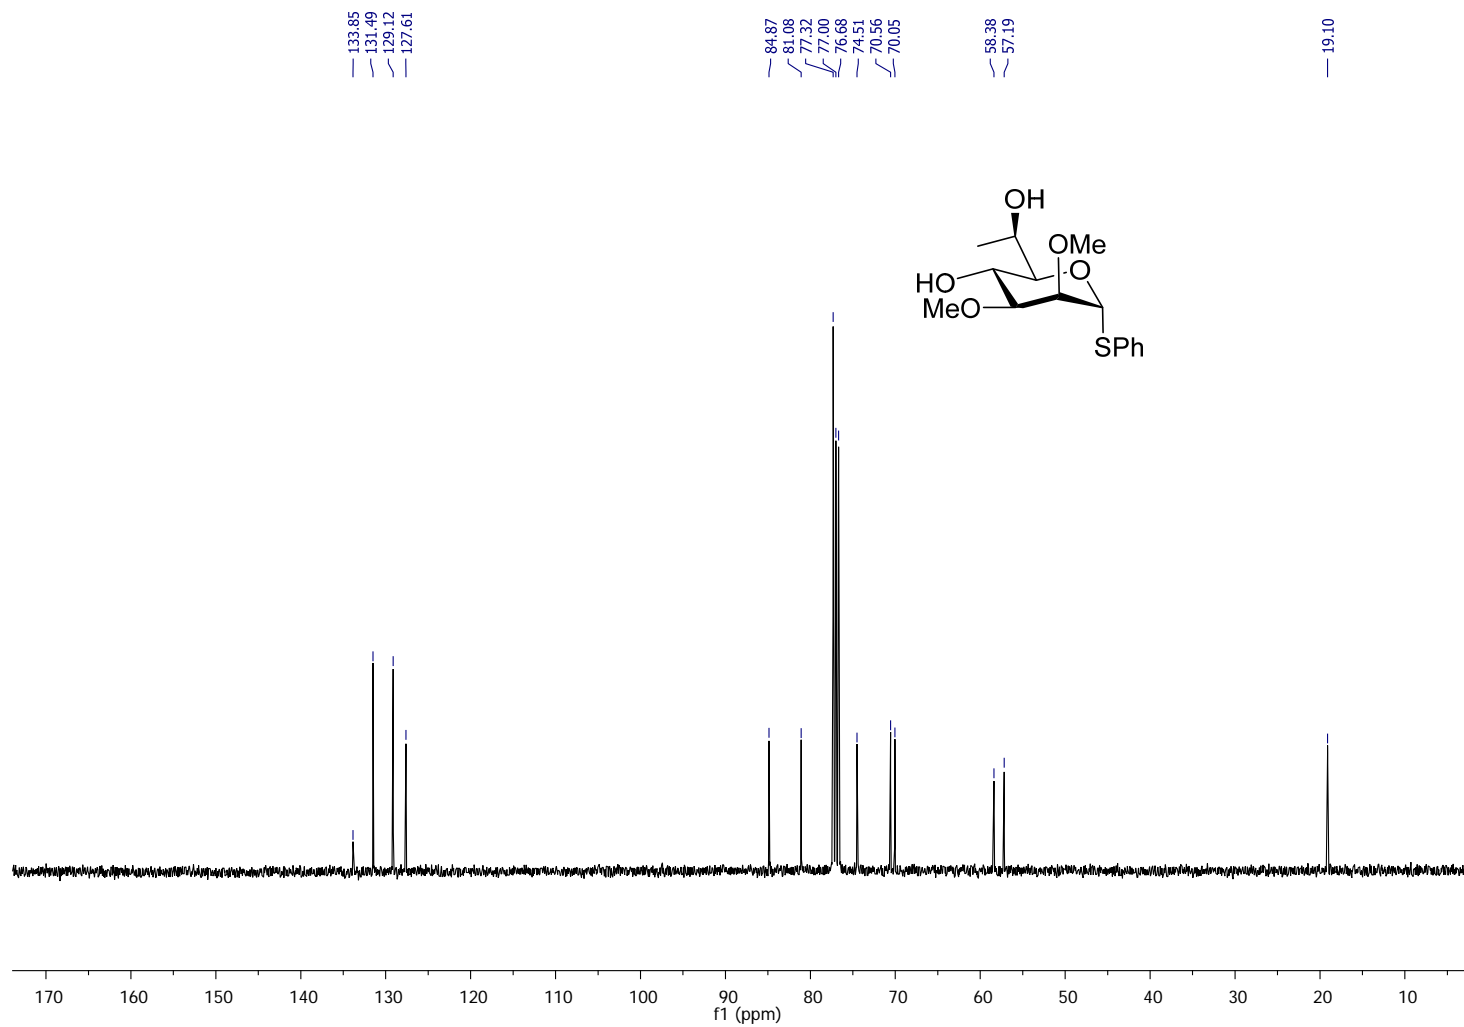

**$^1\text{H}$  NMR (400 MHz,  $\text{CDCl}_3$ ) of Phenyl 7-deoxy-2,3-di-*O*-methyl-L-glycero- $\alpha$ -thio-D-mannoheptopyranoside (33)**

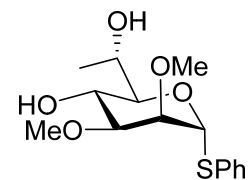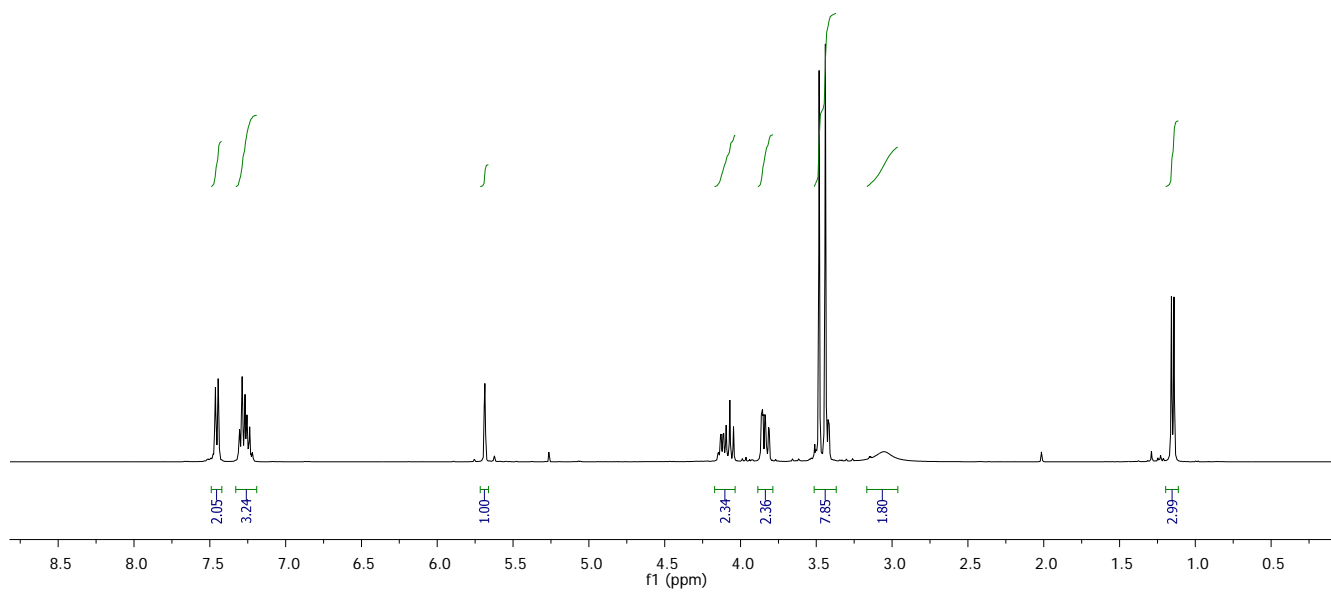

**$^{13}\text{C}$  NMR (100 MHz,  $\text{CDCl}_3$ ) of Phenyl 7-deoxy-2,3-di-*O*-methyl-L-glycero- $\alpha$ -D-thio-mannoheptopyranoside (33)**

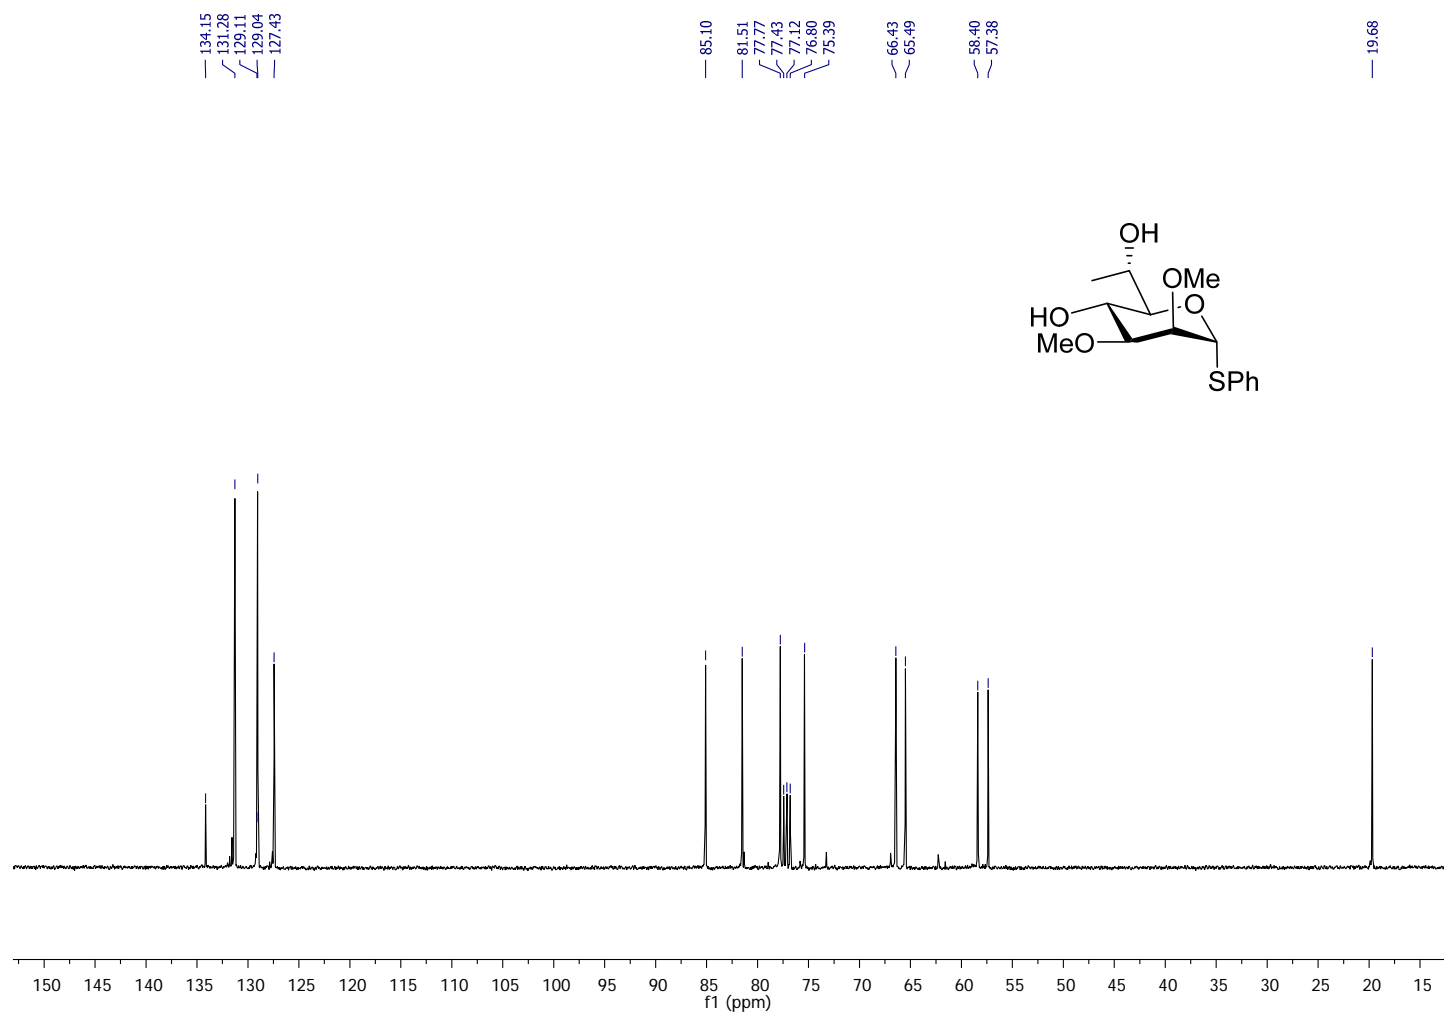



$^1\text{H}$  NMR (400 MHz,  $\text{CDCl}_3$ ) of Phenyl 4,6-*O*-benzylidene-2,3-di-*O*-methyl-7-deoxy-D-glycero- $\alpha$ -D-thio-mannoheptopyranoside

(34)

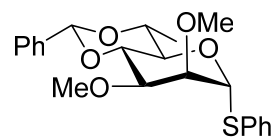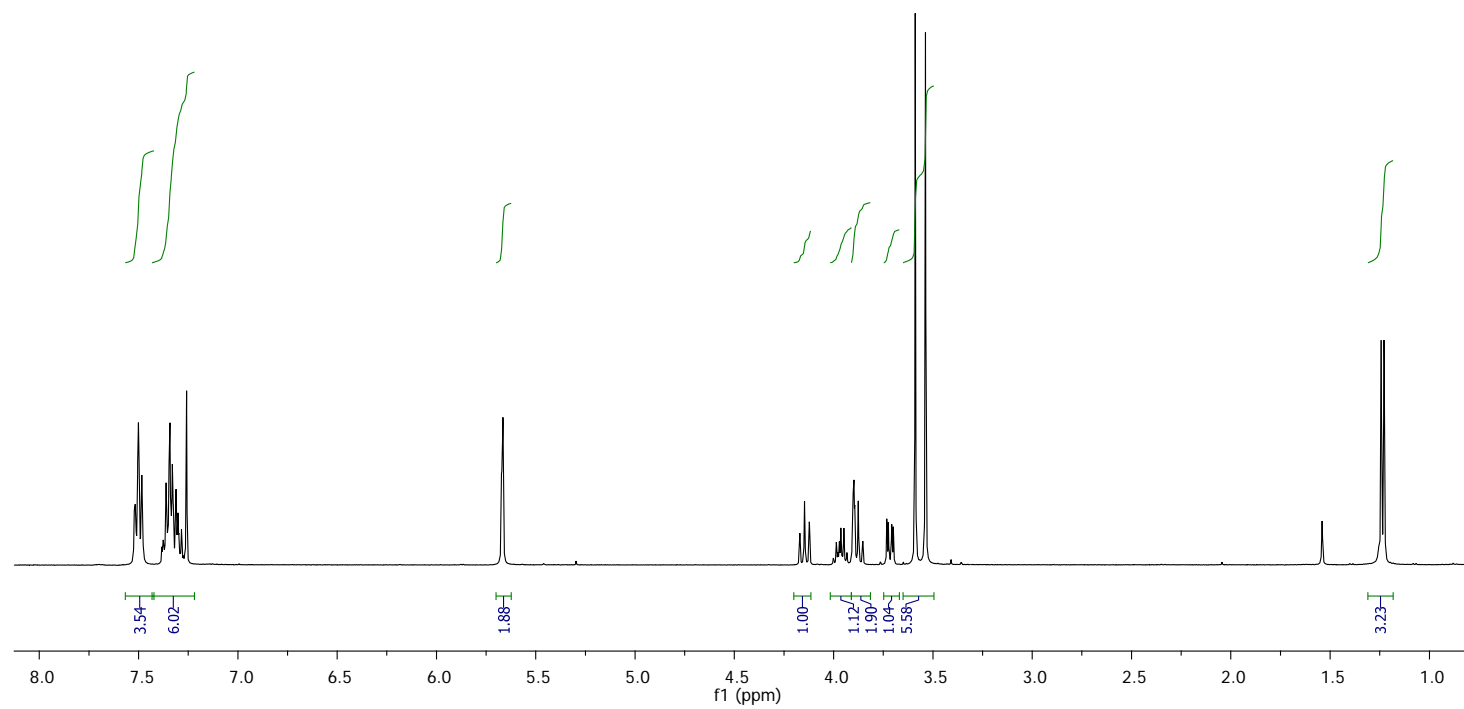

<sup>13</sup>C NMR (100 MHz, CDCl<sub>3</sub>) of Phenyl 4,6-*O*-benzylidene-2,3-di-*O*-methyl-7-dexoy-*D*-glycero- $\alpha$ -*D*-thio-mannoheptopyranoside

(34)

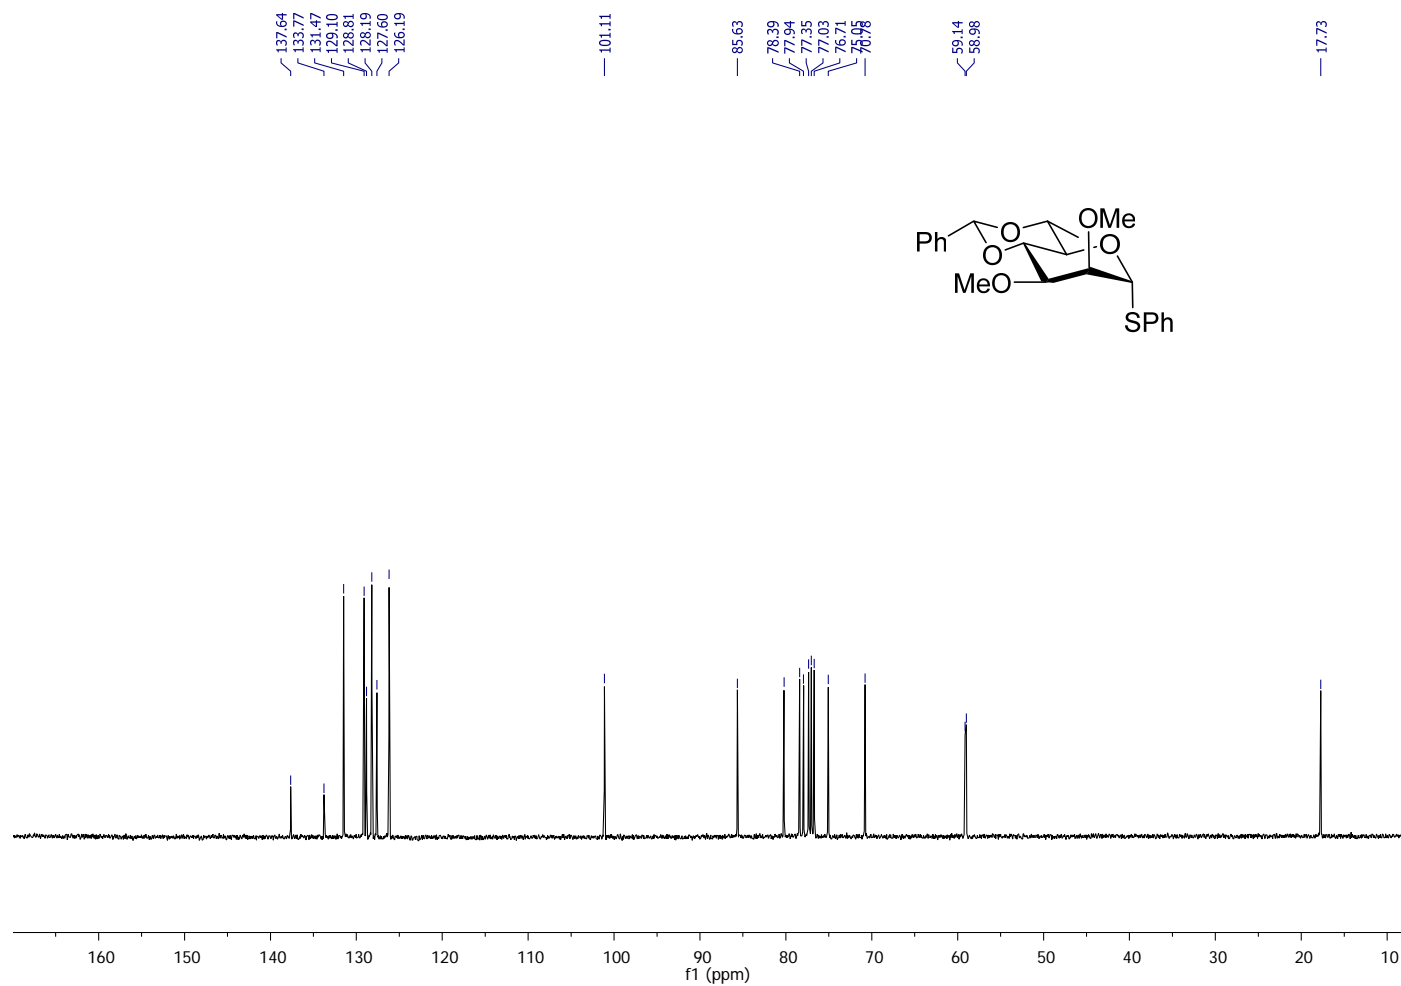

<sup>1</sup>H NMR (400 MHz, CDCl<sub>3</sub>) of Phenyl 4,6-O-benzylidene-7-dexoy-2,3-di-O-methyl-L-glycero- $\alpha$ -D-thio-mannoheptopyranoside  
(35)

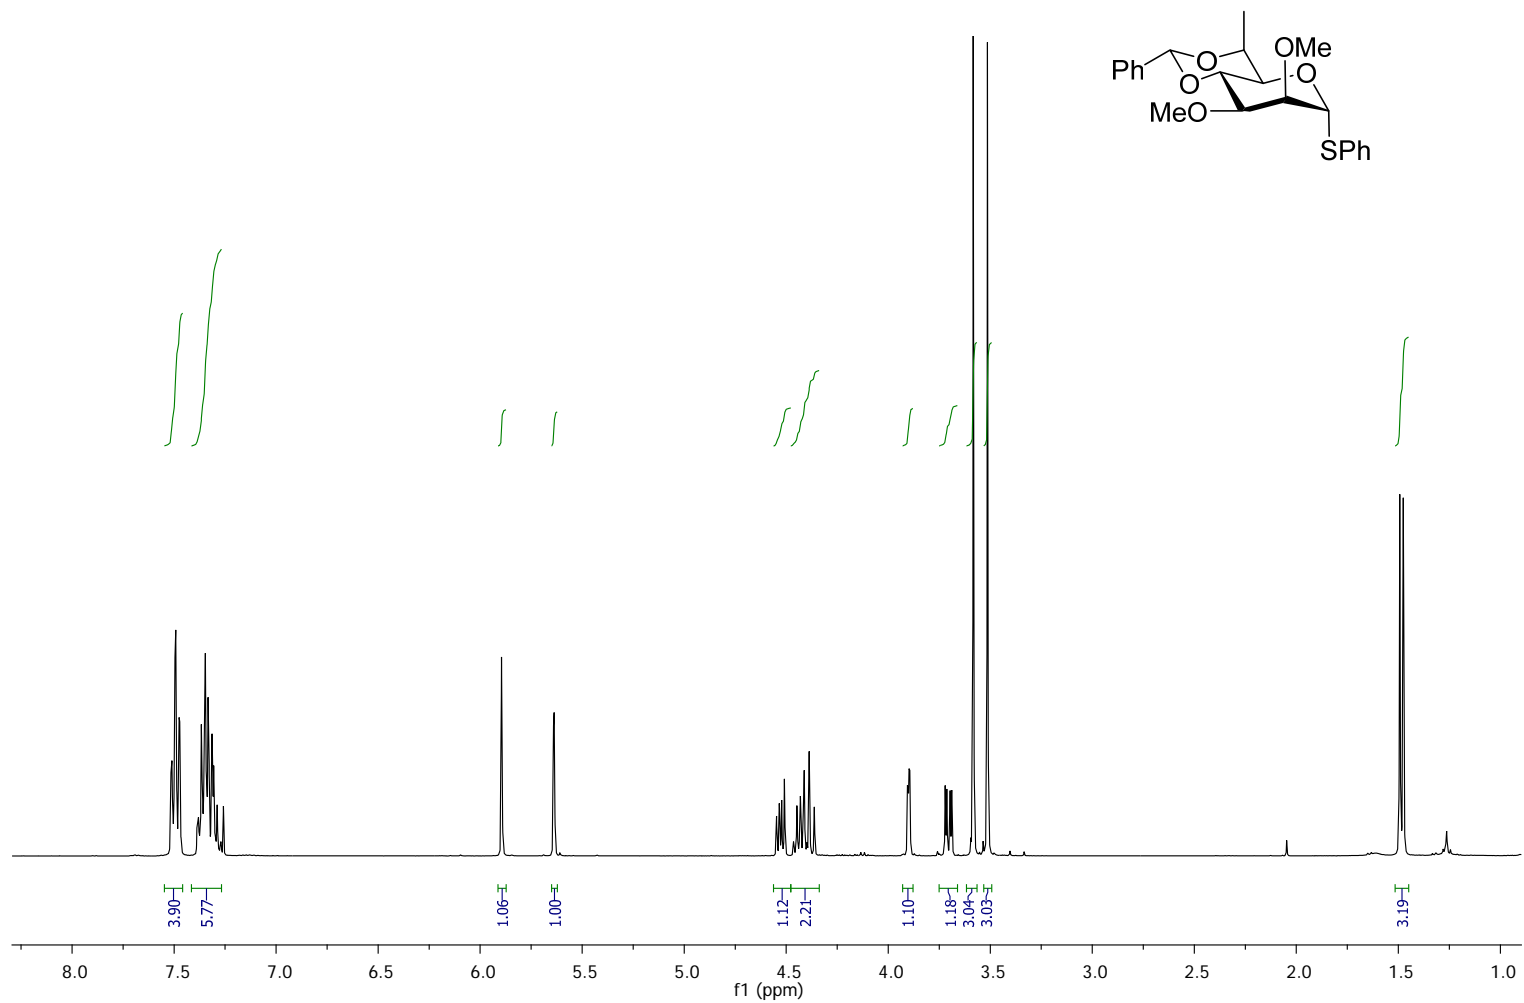

<sup>13</sup>C NMR (100 MHz, CDCl<sub>3</sub>) of Phenyl 4,6-*O*-benzylidene-7-deoxy-2,3-di-*O*-methyl-L-glycero- $\alpha$ -D-thio-mannoheptopyranoside  
(35)

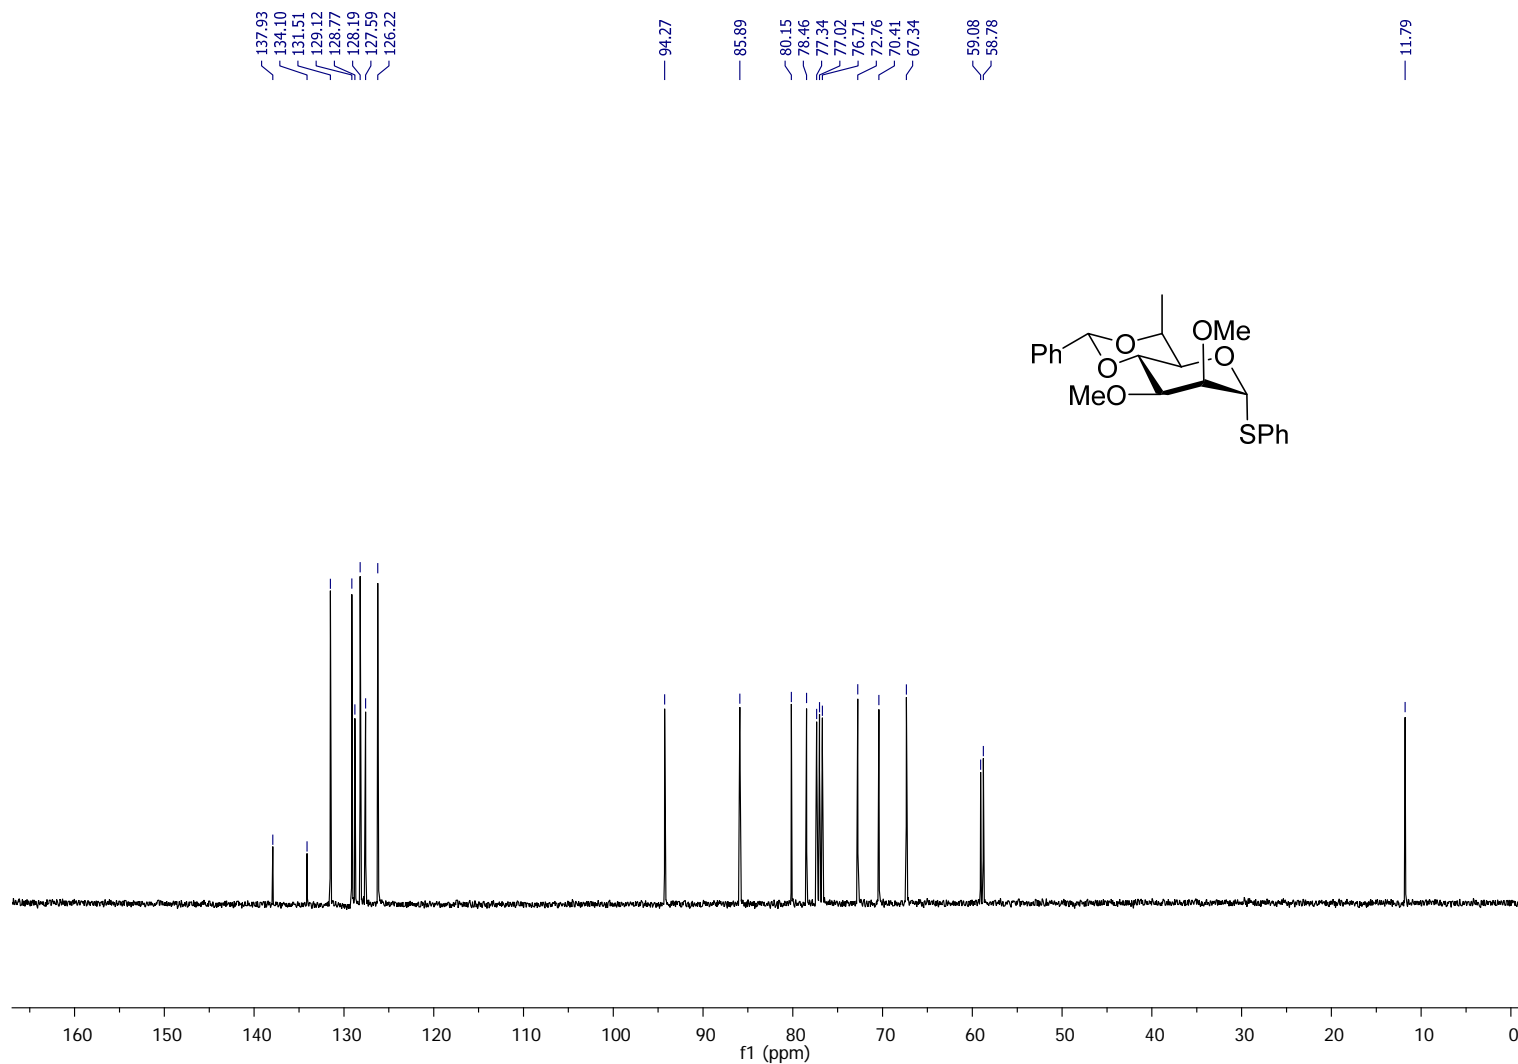

**<sup>1</sup>H NMR (400 MHz, CDCl<sub>3</sub>) of Methyl 4,8-anhydro-7-deoxy-2,3,6-tri-*O*-methyl- $\beta$ -D-mannoctopyranosyl-(1 $\rightarrow$ 6)-2',3',4'-tri-*O*-benzyl- $\alpha$ -D-glucopyranoside (39 $\beta$ )**

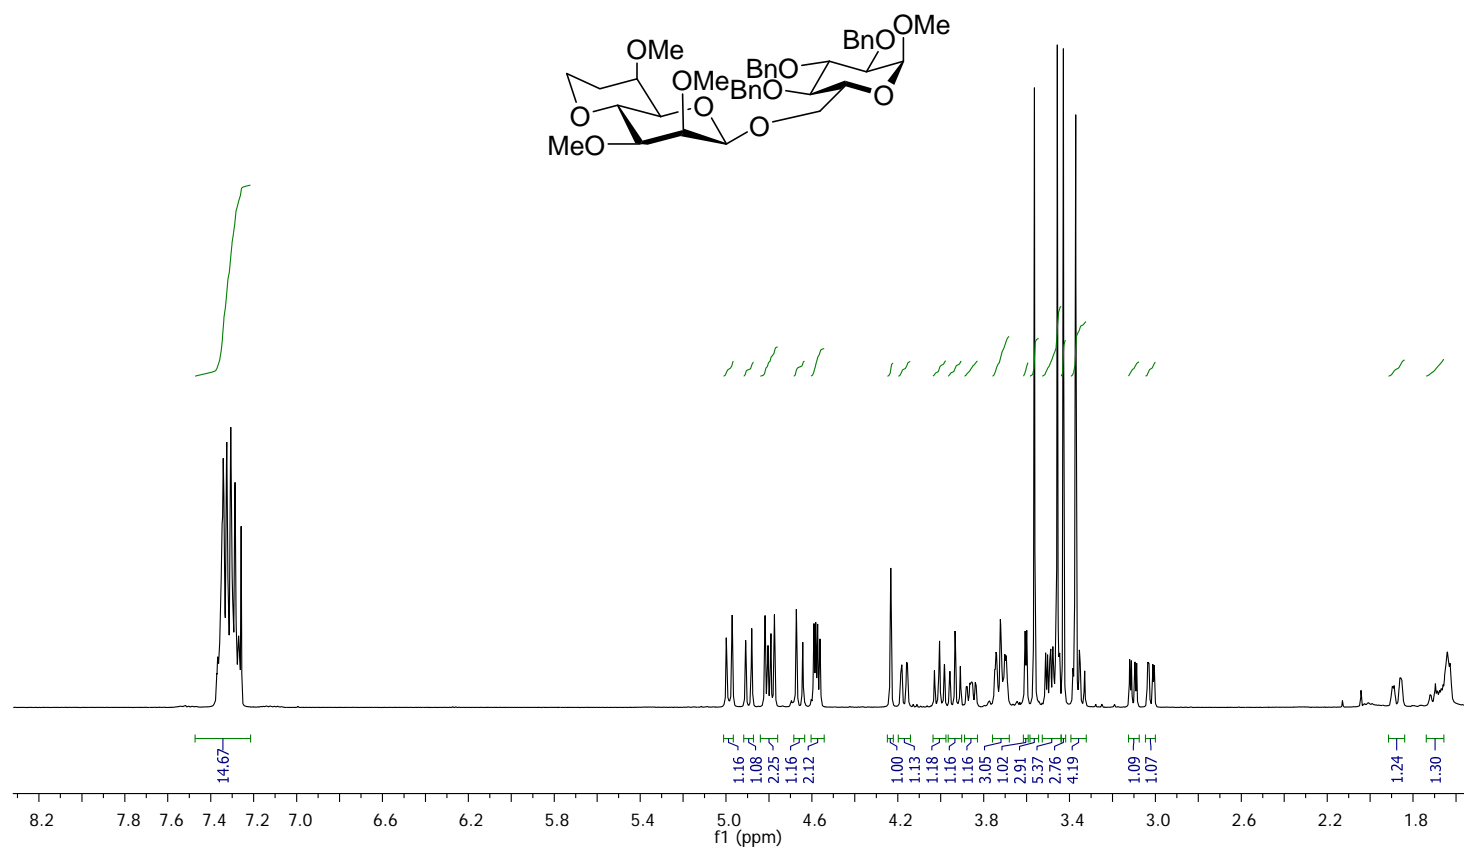

**$^{13}\text{C}$  NMR (100 MHz,  $\text{CDCl}_3$ ) of Methyl 4,8-anhydro-7-deoxy-2,3,6-tri-*O*-methyl- $\beta$ -D-mannoctopyranosyl-(1 $\rightarrow$ 6)-2',3',4'-tri-*O*-benzyl- $\alpha$ -D-glucopyranoside (39 $\beta$ )**

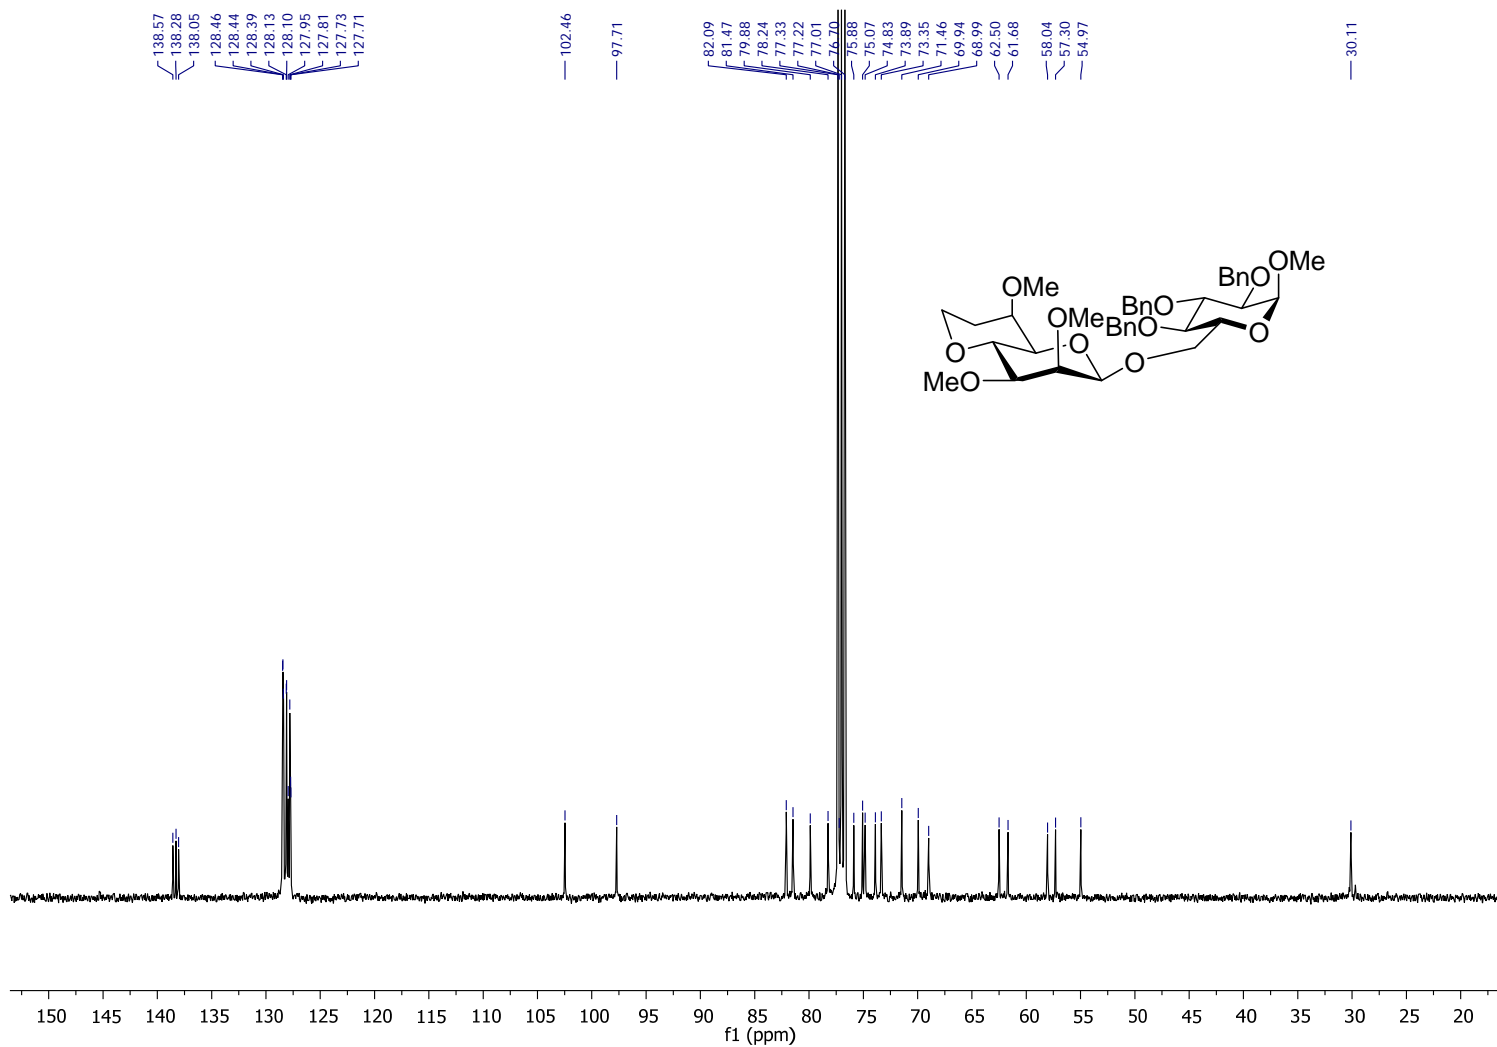

**<sup>1</sup>H NMR (600 MHz, CDCl<sub>3</sub>) of Methyl 4,8-anhydro-7-deoxy-2,3,6-tri-*O*-methyl- $\alpha$ -D-mannoctopyranosyl-(1 $\rightarrow$ 6)-2',3',4'-tri-*O*-benzyl- $\alpha$ -D-glucopyranoside (39 $\alpha$ )**

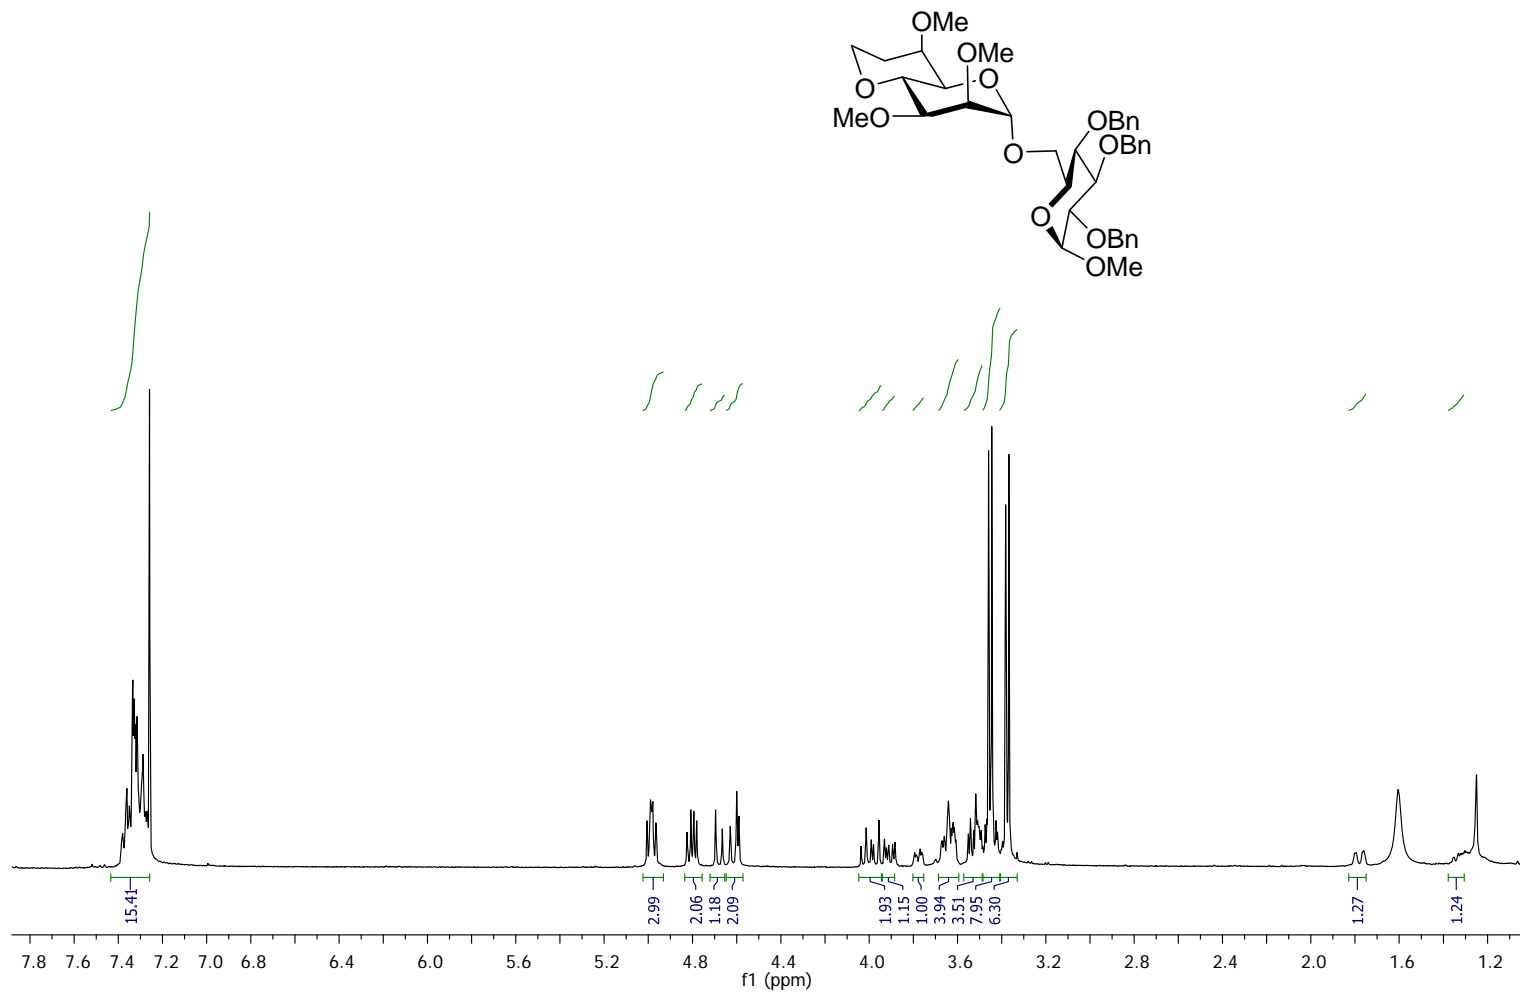

**<sup>13</sup>C NMR (100 MHz, CDCl<sub>3</sub>) of Methyl 4,8-anhydro-7-deoxy-2,3,6-tri-*O*-methyl-*D*-glycero- $\alpha$ -*D*-mannooctopyranosyl-(1 $\rightarrow$ 6)-2',3',4'-tri-*O*-benzyl- $\alpha$ -*D*-glucopyranoside (39 $\alpha$ )**

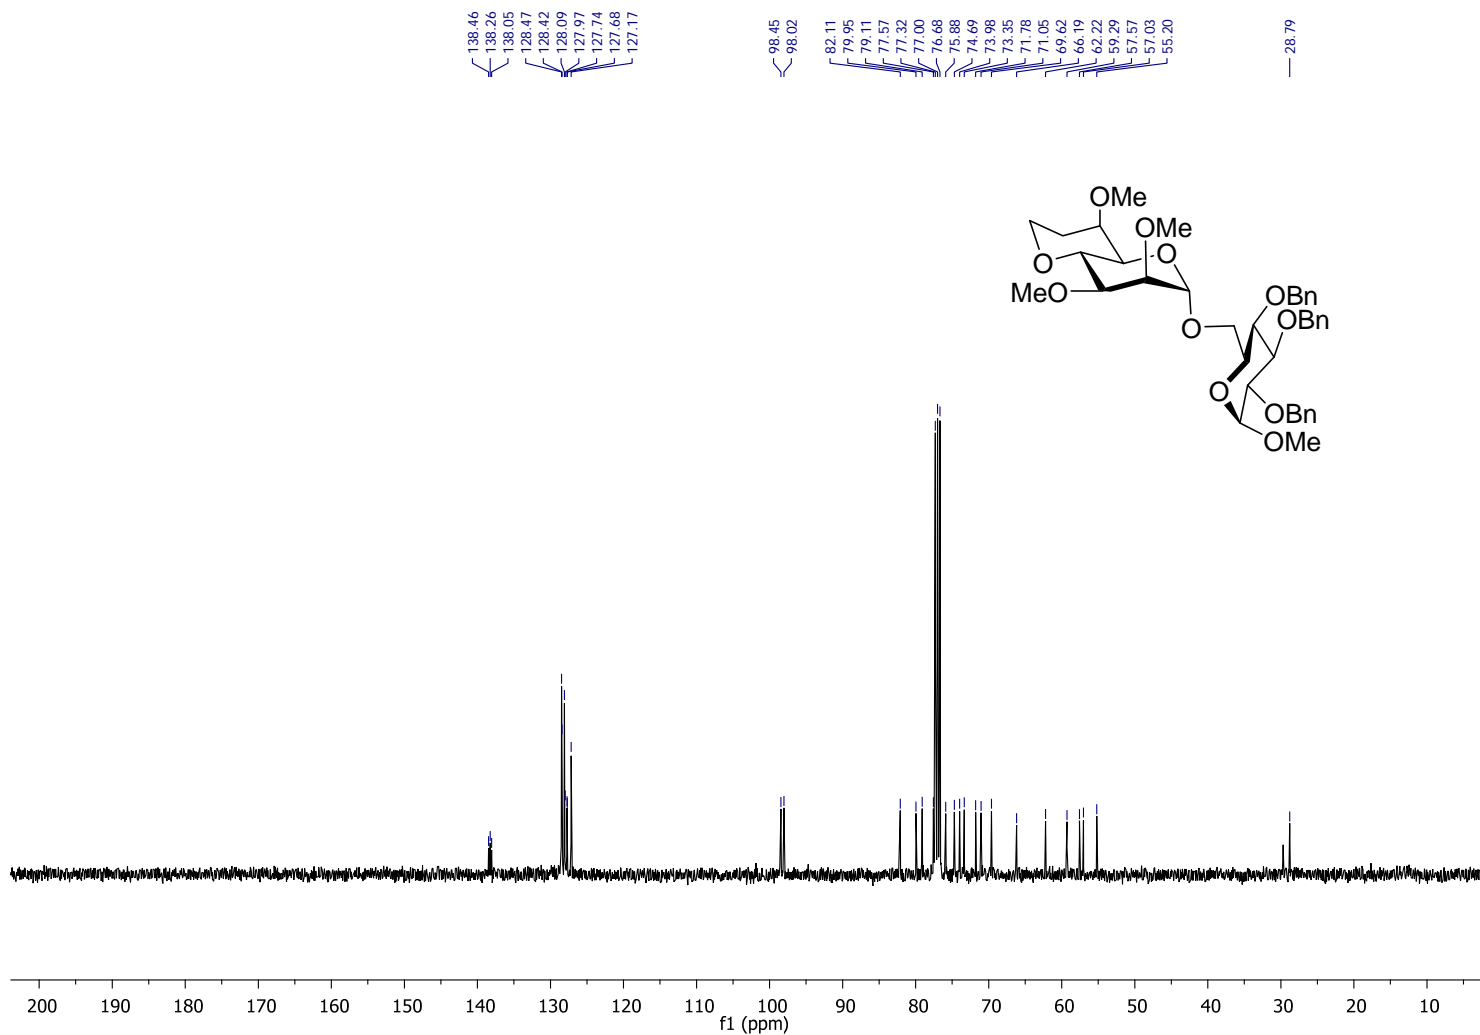



**<sup>1</sup>H NMR (400 MHz, CDCl<sub>3</sub>) of Methyl 4,8-anhydro-7-deoxy-2,3,6-tri-*O*-methyl-*D*-glycero- $\beta$ -*D*-mannooctopyranosyl-(1 $\rightarrow$ 4)-2',3',6'-tri-*O*-benzyl- $\alpha$ -*D*-glucopyranoside (40 $\beta$ )**

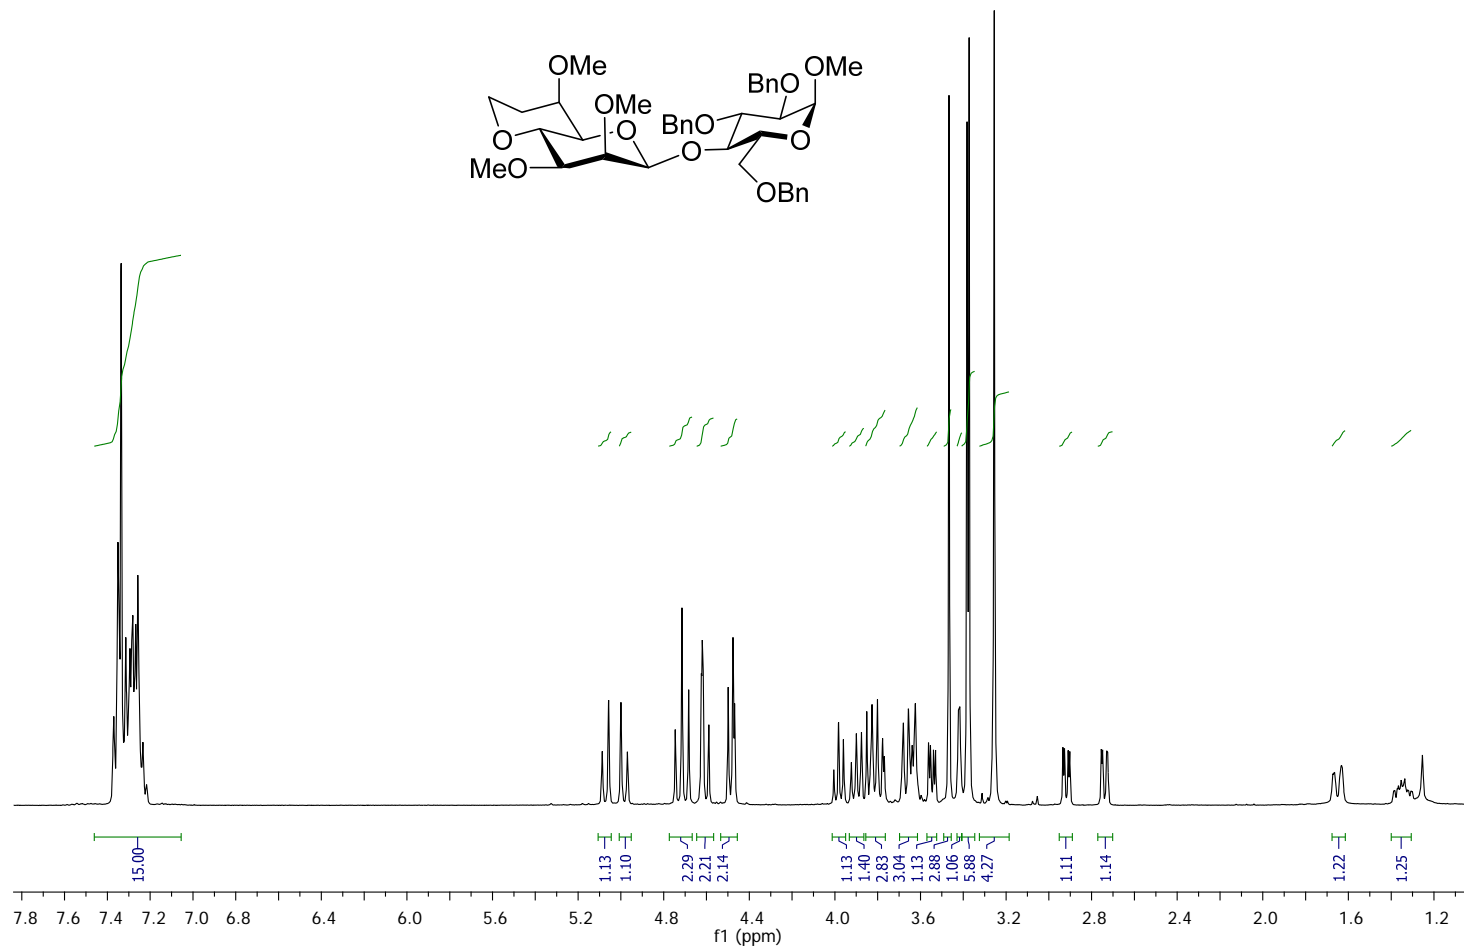

**$^{13}\text{C}$  NMR (100 MHz,  $\text{CDCl}_3$ ) of Methyl 4,8-anhydro-7-deoxy-2,3,6-tri-*O*-methyl- $\beta$ -D-mannoctopyranosyl-(1 $\rightarrow$ 4)-2',3',6'-tri-*O*-benzyl- $\alpha$ -D-glucopyranoside (40 $\beta$ )**

139.75  
138.07  
137.87  
128.45  
128.36  
128.10  
127.86  
127.83  
127.72  
126.89  
126.57

102.07  
98.10

81.98  
80.32  
79.73  
77.43  
77.33  
77.17  
77.01  
76.69  
75.09  
74.47  
73.64  
73.55  
73.33  
71.33  
69.38  
68.77  
62.46  
61.35  
58.17  
57.42  
55.22

30.29

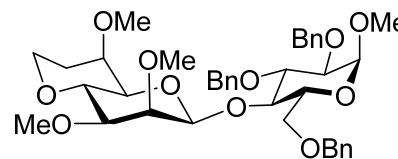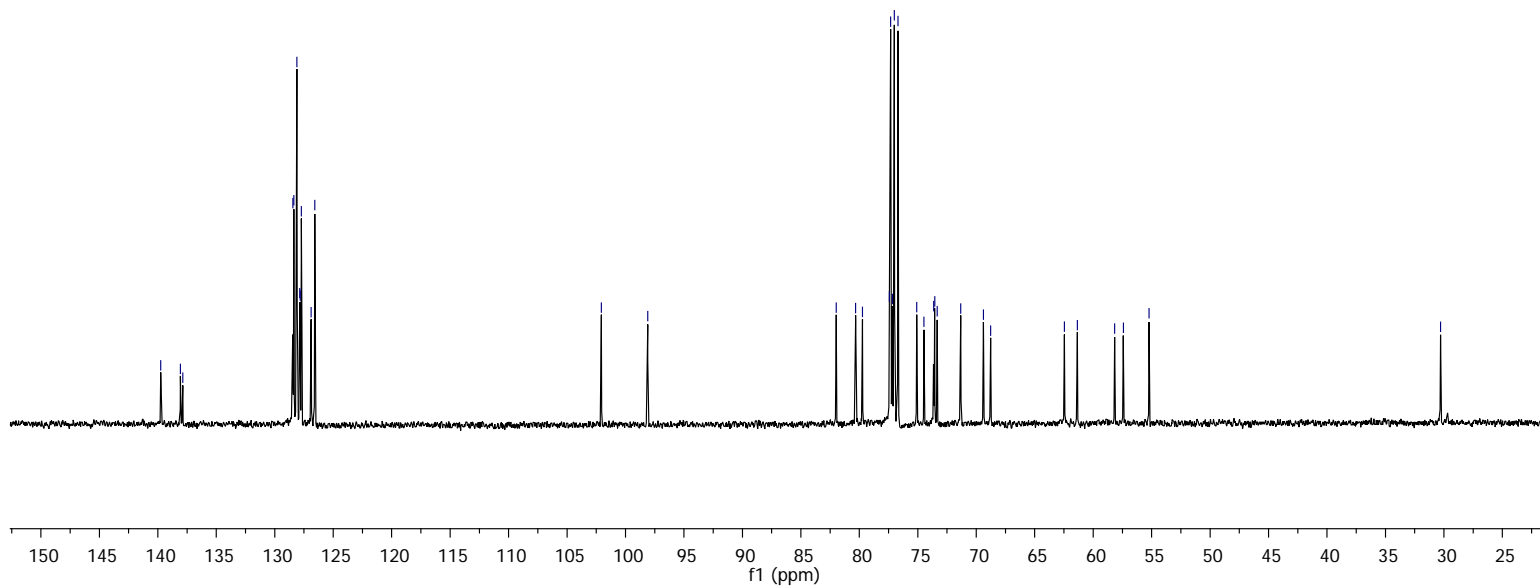

**<sup>1</sup>H NMR (600 MHz, CDCl<sub>3</sub>) of Methyl 4,8-anhydro-7-deoxy-2,3,6-tri-*O*-methyl-*D*-glycero- $\alpha$ -*D*-mannooctopyranosyl-(1 $\rightarrow$ 4)-2',3',6'-tri-*O*-benzyl- $\alpha$ -*D*-glucopyranoside (40 $\alpha$ )**

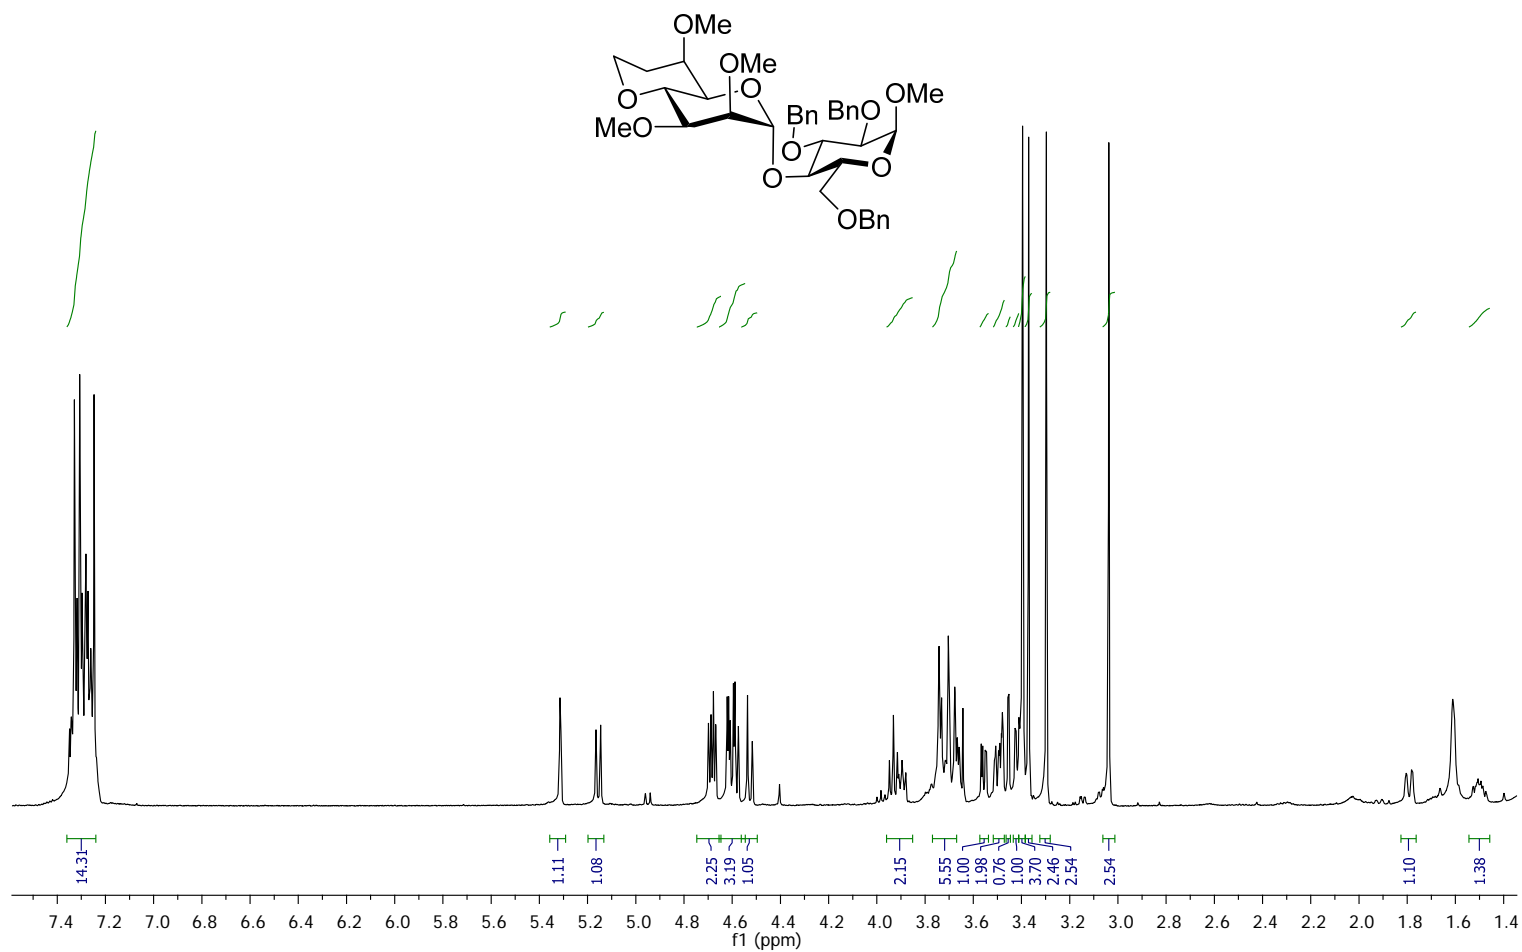

**$^{13}\text{C}$  NMR (150 MHz,  $\text{CDCl}_3$ ) of Methyl 4,8-anhydro-7-deoxy-2,3,6-tri-*O*-methyl- $\alpha$ -D-mannoctopyranosyl-(1 $\rightarrow$ 4)-2',3',6'-tri-*O*-benzyl- $\alpha$ -D-glucopyranoside (40 $\alpha$ )**

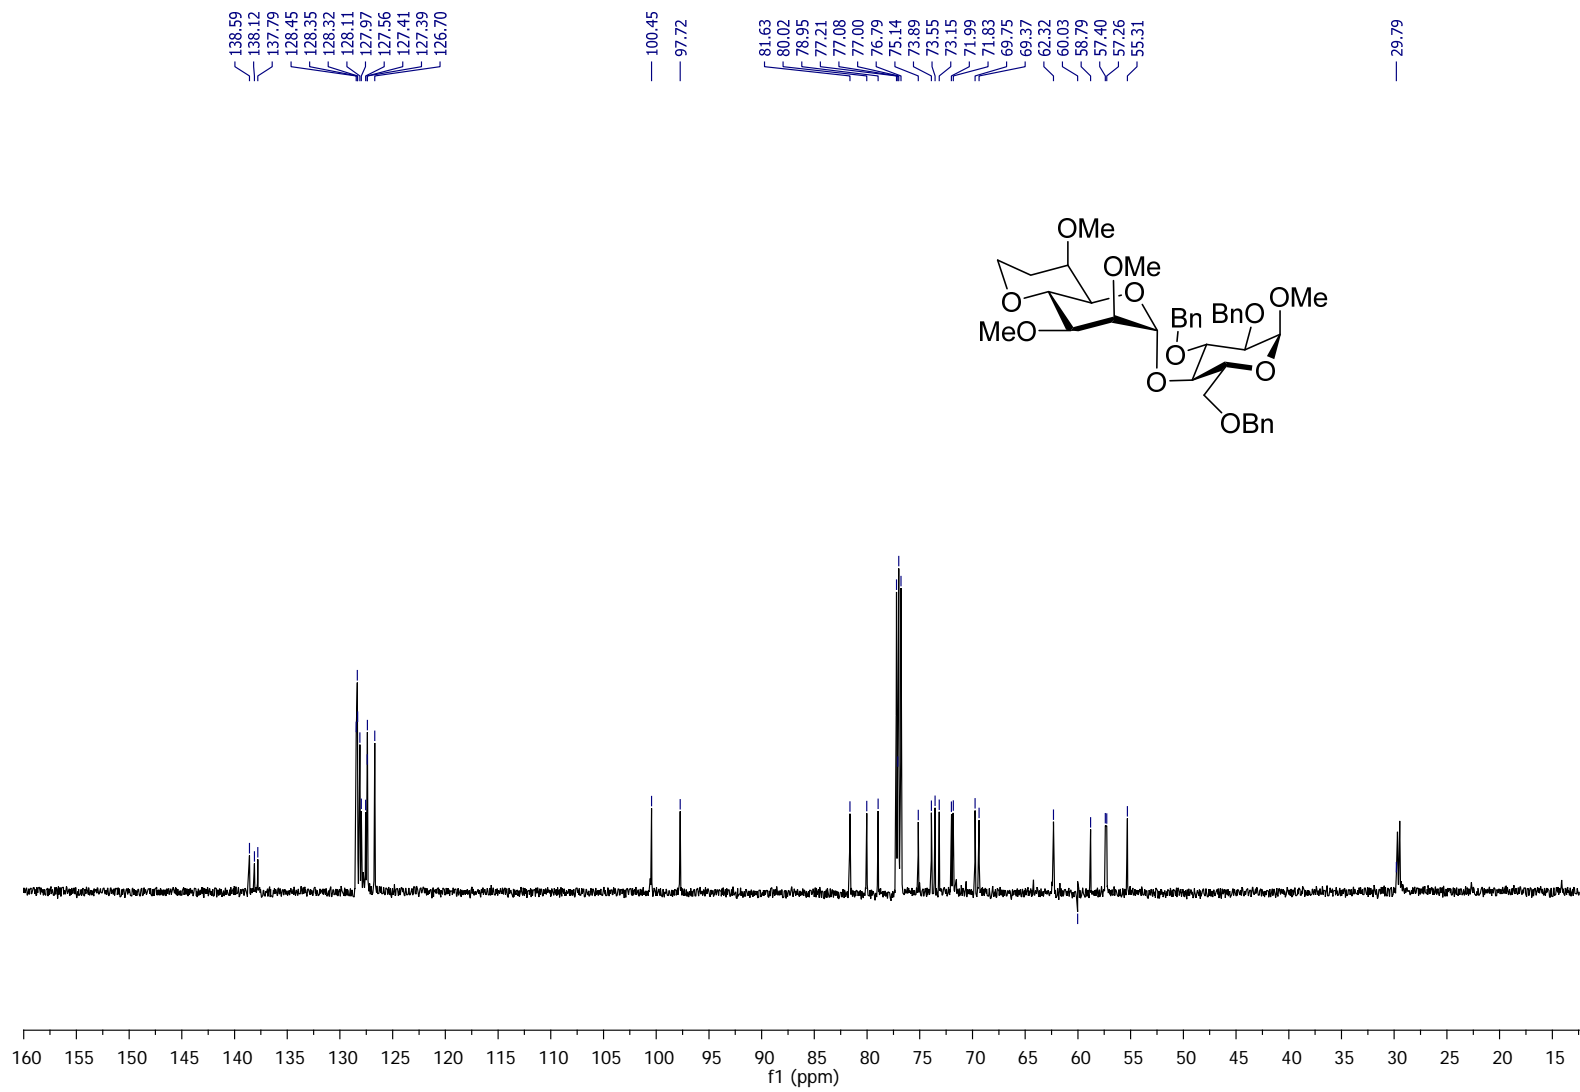

**<sup>1</sup>H NMR (400 MHz, CDCl<sub>3</sub>) of (1-Adamantanyl) 4,8-anhydro-7-deoxy-2,3,6-tri-*O*-methyl-*D*-glycero- $\beta$ -*D*-mannooctopyranoside (41 $\beta$ )**

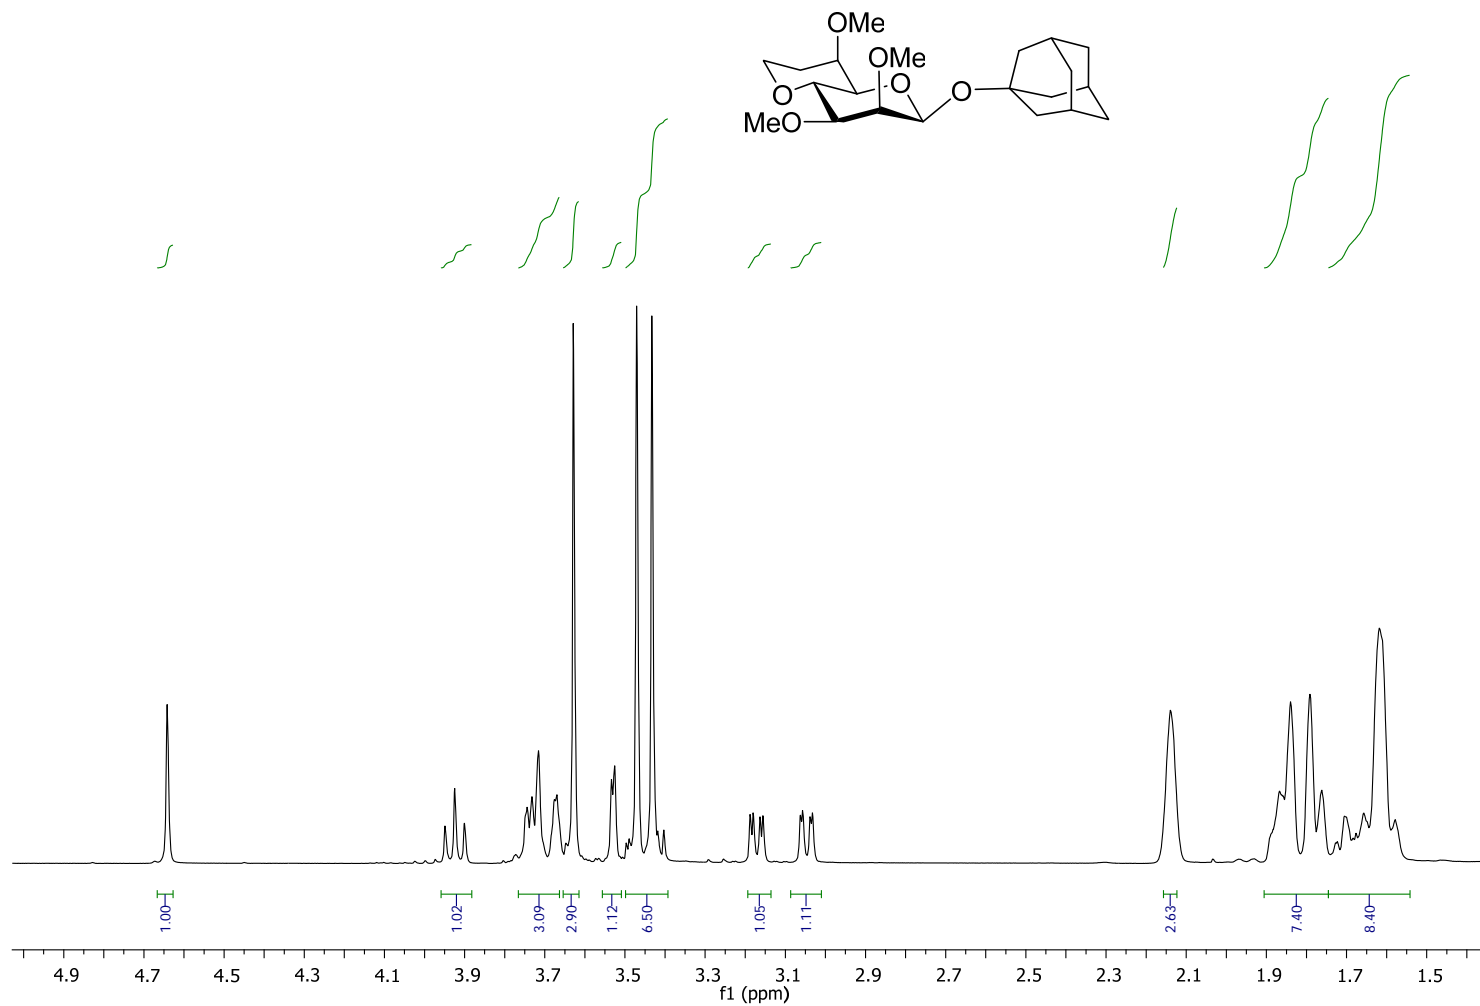

<sup>13</sup>C NMR (100 MHz, CDCl<sub>3</sub>) of (1-Adamantanyl) 4,8-anhydro-7-deoxy-2,3,6-tri-*O*-methyl- $\beta$ -D-mannoctopyranoside  
(41 $\beta$ )

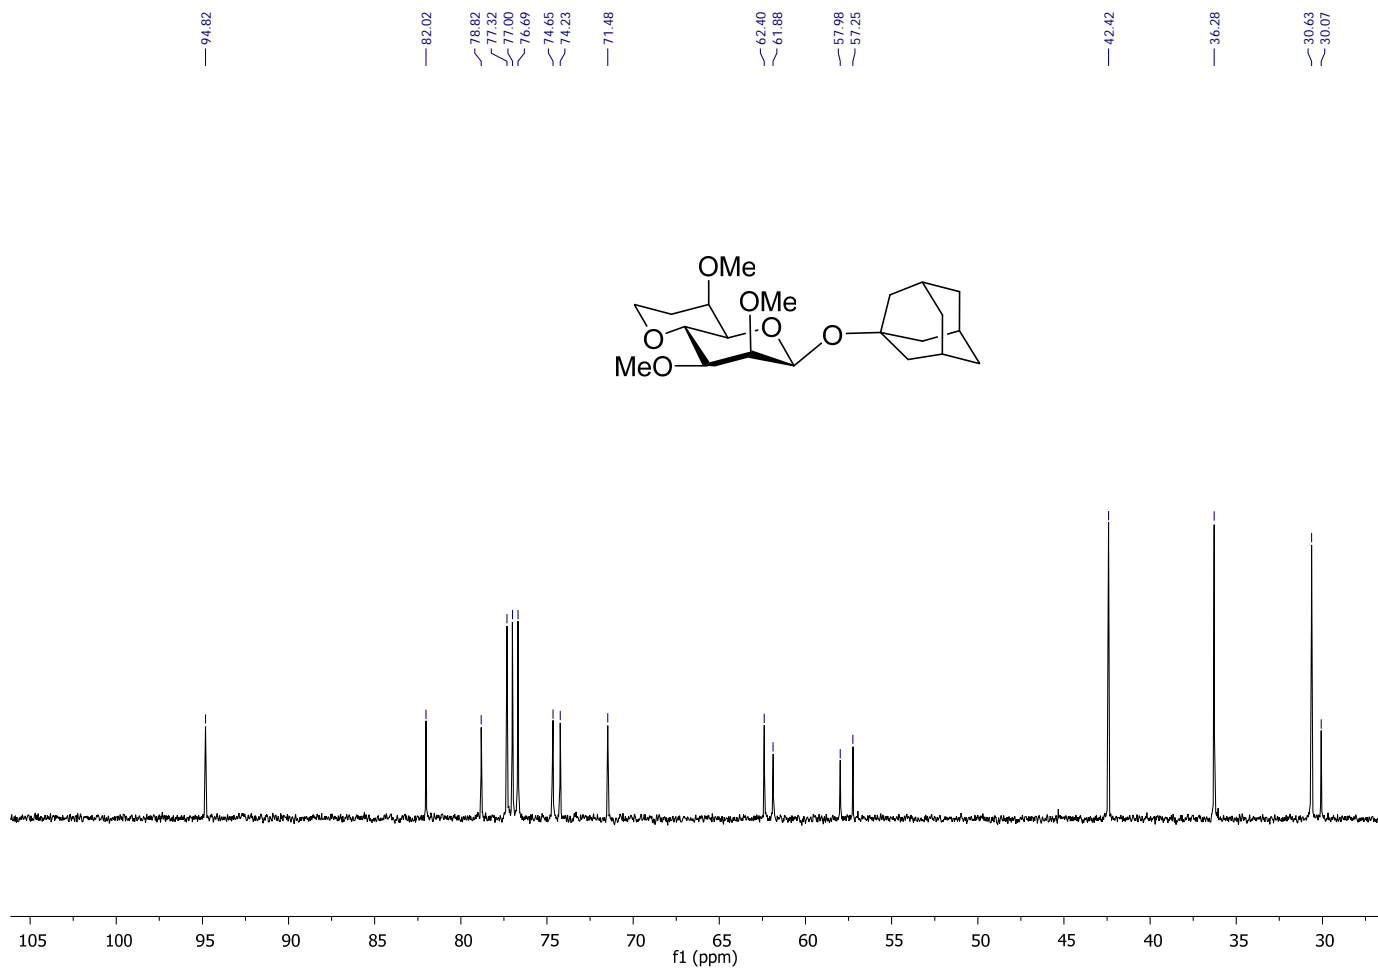

<sup>1</sup>H NMR (400 MHz, CDCl<sub>3</sub>) of (1-Adamantanyl) 4,8-anhydro-7-deoxy-2,3,6-tri-*O*-methyl-*D*-glycero- $\alpha$ -*D*-mannooctopyranoside  
(41 $\alpha$ )

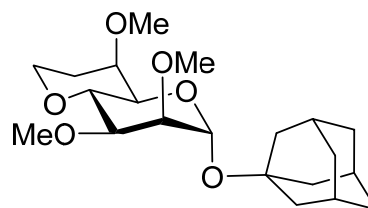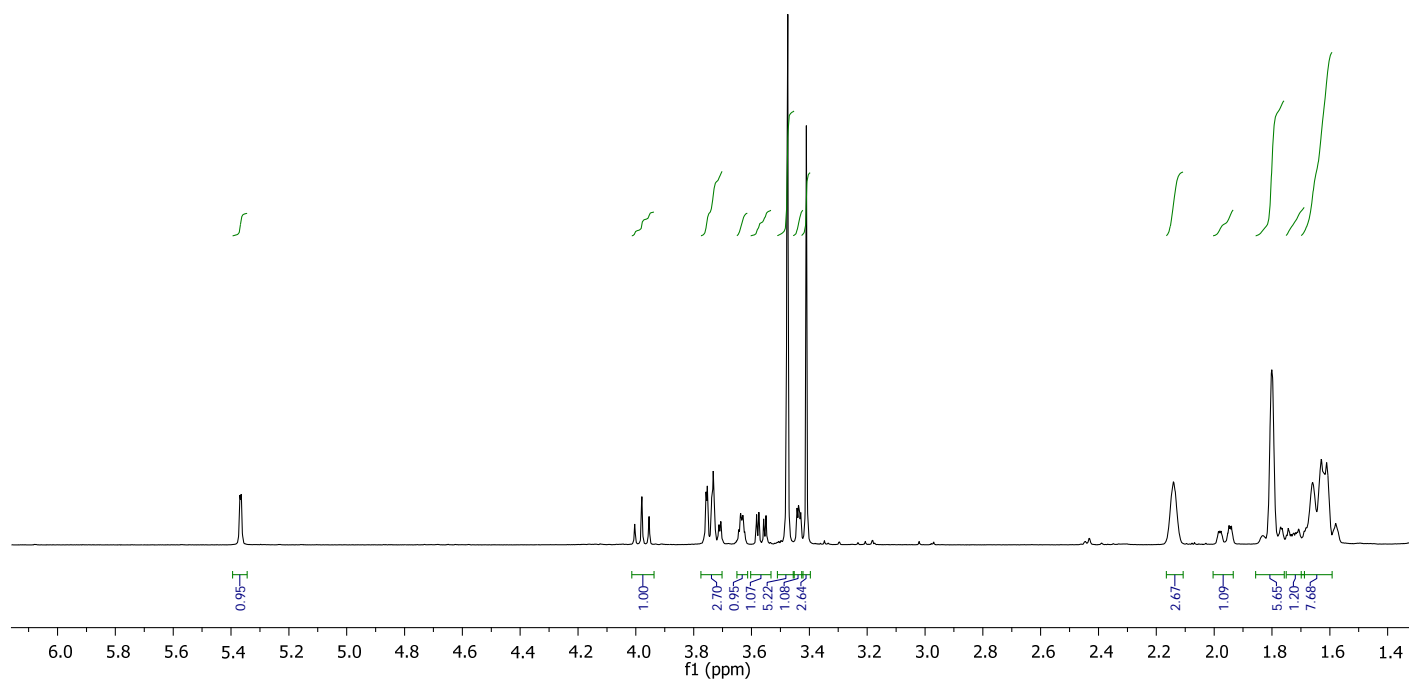

<sup>13</sup>C NMR (100 MHz, CDCl<sub>3</sub>) of (1-Adamantanyl) 4,8-anhydro-7-deoxy-2,3,6-tri-*O*-methyl-*D*-glycero- $\alpha$ -*D*-mannooctopyranoside

(41 $\alpha$ )

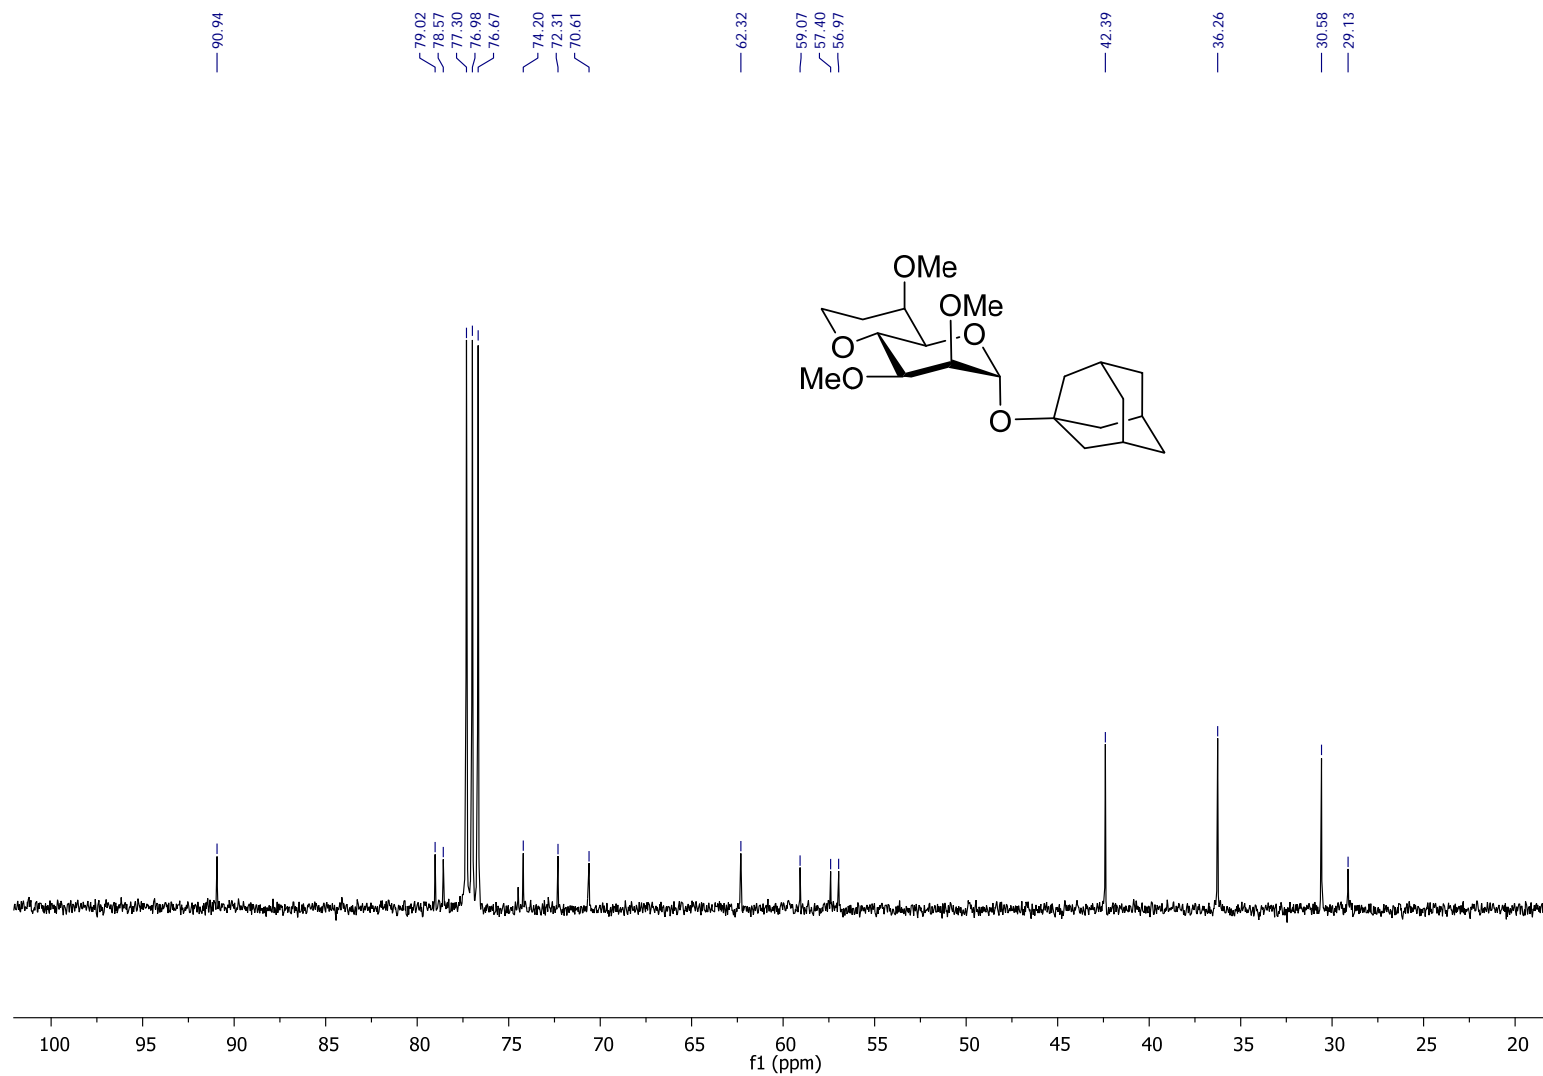



**<sup>1</sup>H NMR (600 MHz, CDCl<sub>3</sub>) of Methyl 4,8-anhydro-7-deoxy-2,3,6-tri-*O*-methyl-L-glycero-β-D-mannoctopyranosyl-(1→6)-2',3',4'-tri-*O*-benzyl-α-D-glucopyranoside (42β)**

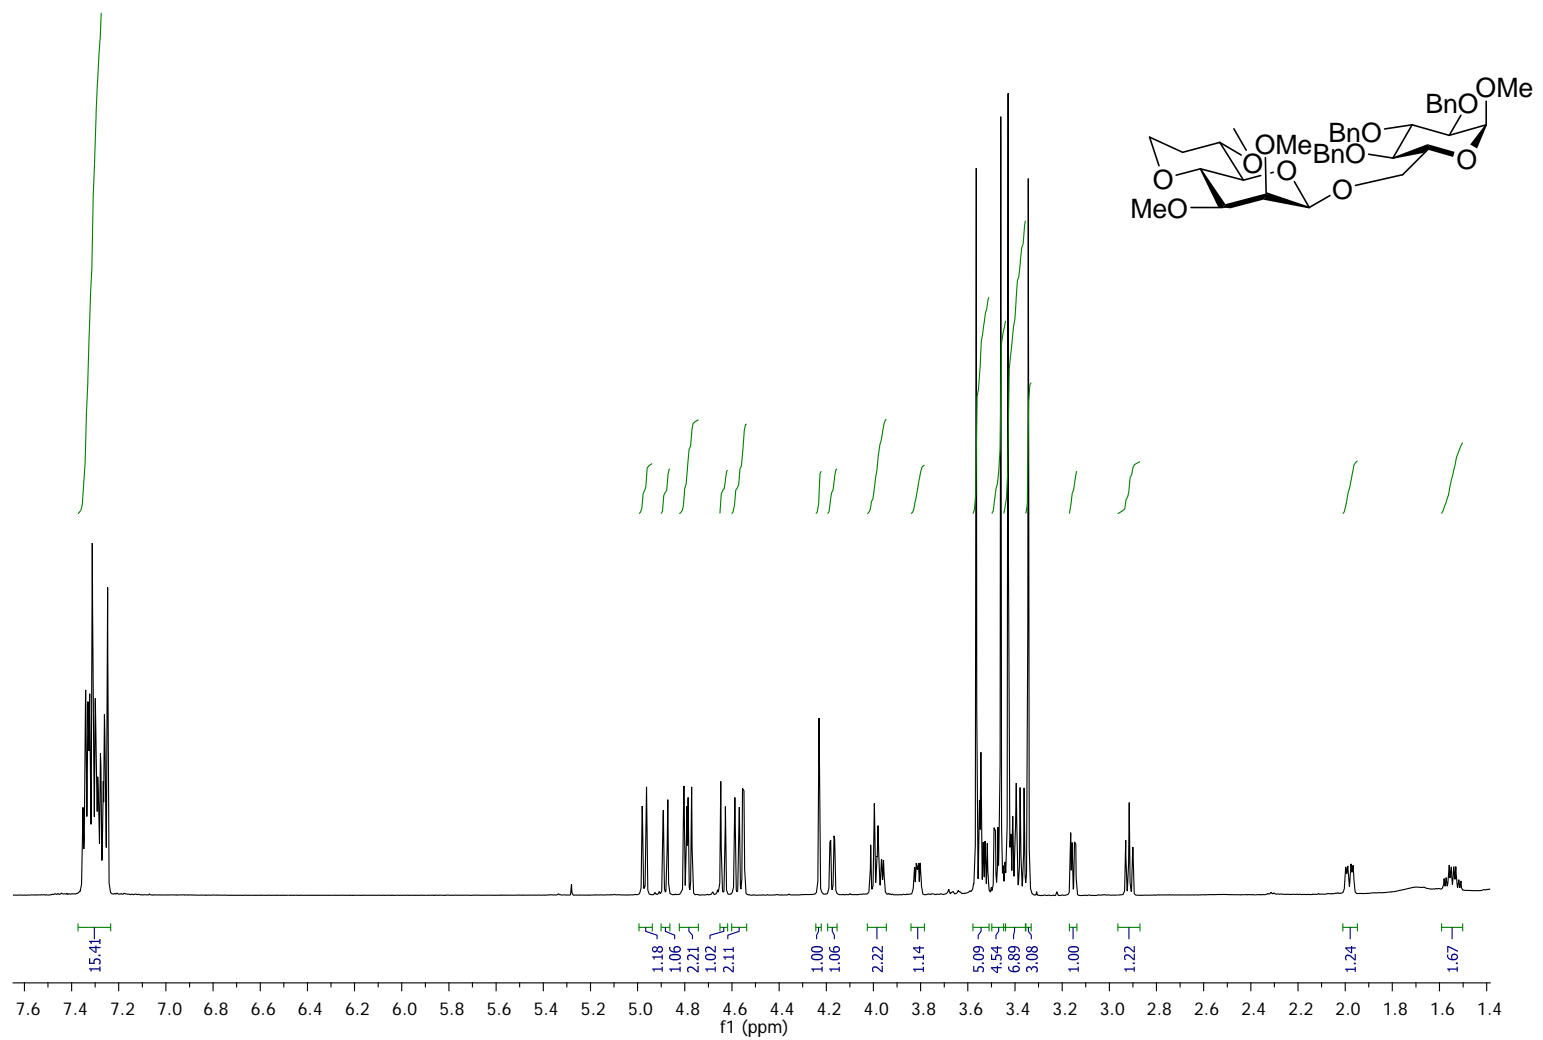

**$^{13}\text{C}$  NMR (100 MHz,  $\text{CDCl}_3$ ) of Methyl 4,8-anhydro-7-deoxy-2,3,6-tri-*O*-methyl-L-glycero- $\beta$ -D-mannoctopyranosyl-(1 $\rightarrow$ 6)-2',3',4'-tri-*O*-benzyl- $\alpha$ -D-glucopyranoside (42 $\beta$ )**

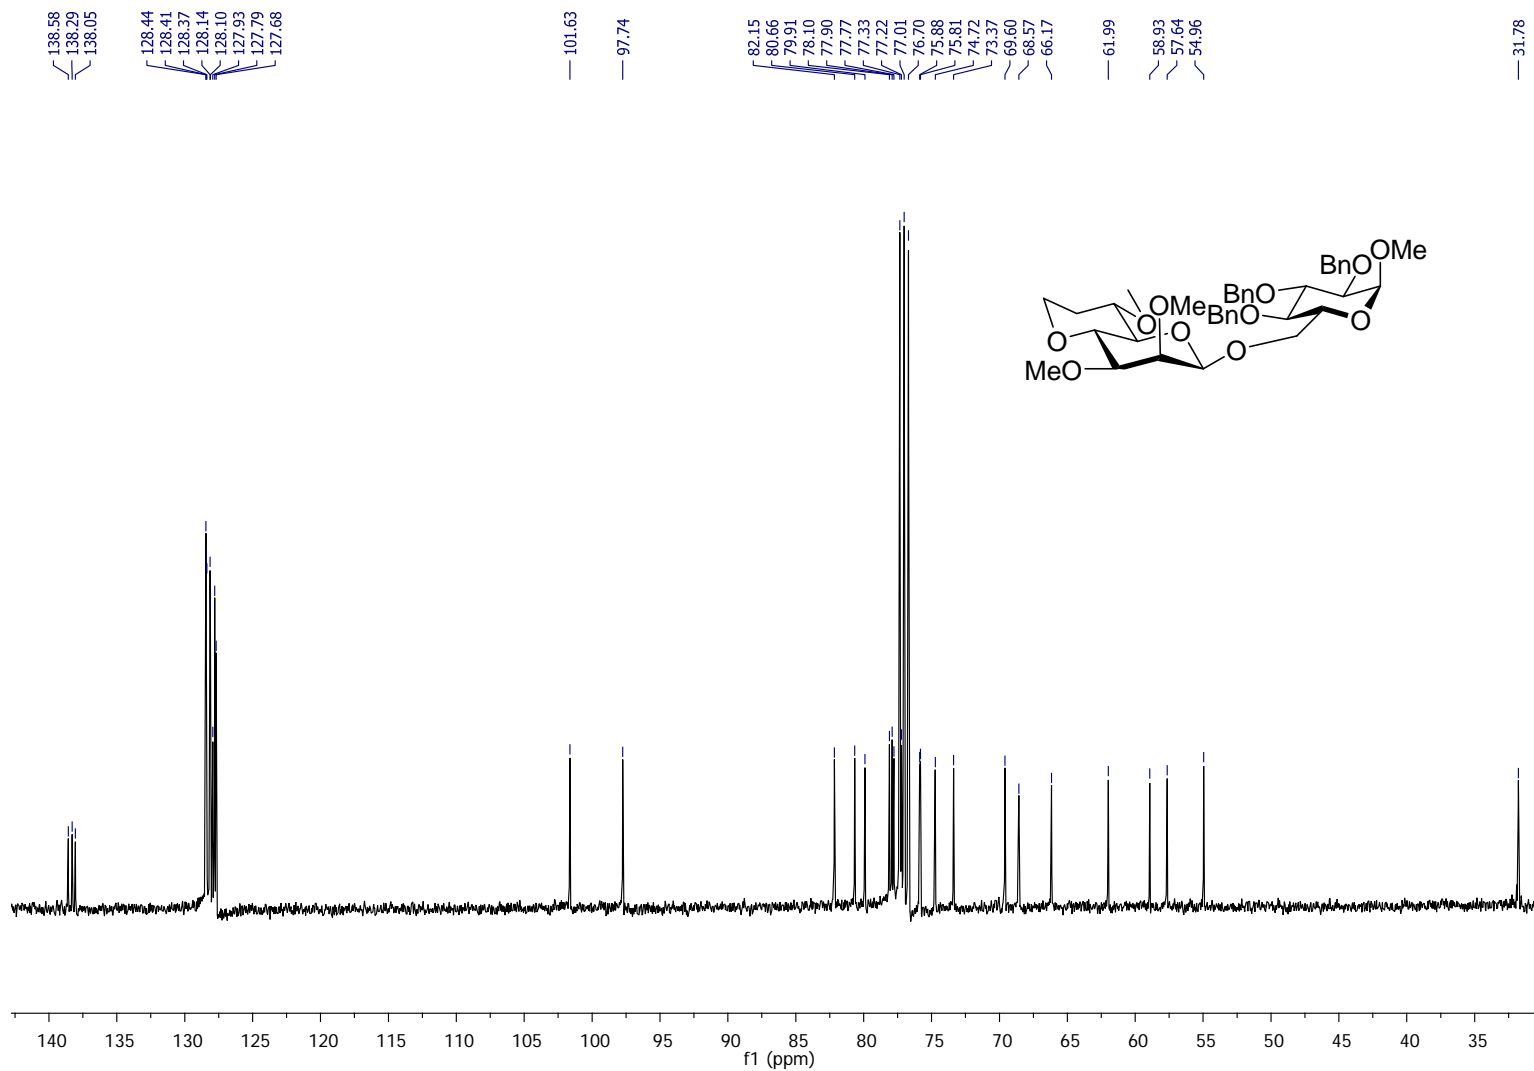

**$^1\text{H}$  NMR (600 MHz,  $\text{CDCl}_3$ ) of Methyl 4,8-anhydro-7-deoxy-2,3,6-tri-*O*-methyl-L-glycero- $\alpha$ -D-mannoctopyranosyl-(1 $\rightarrow$ 6)-2',3',4'-tri-*O*-benzyl- $\alpha$ -D-glucopyranoside (42 $\alpha$ )**

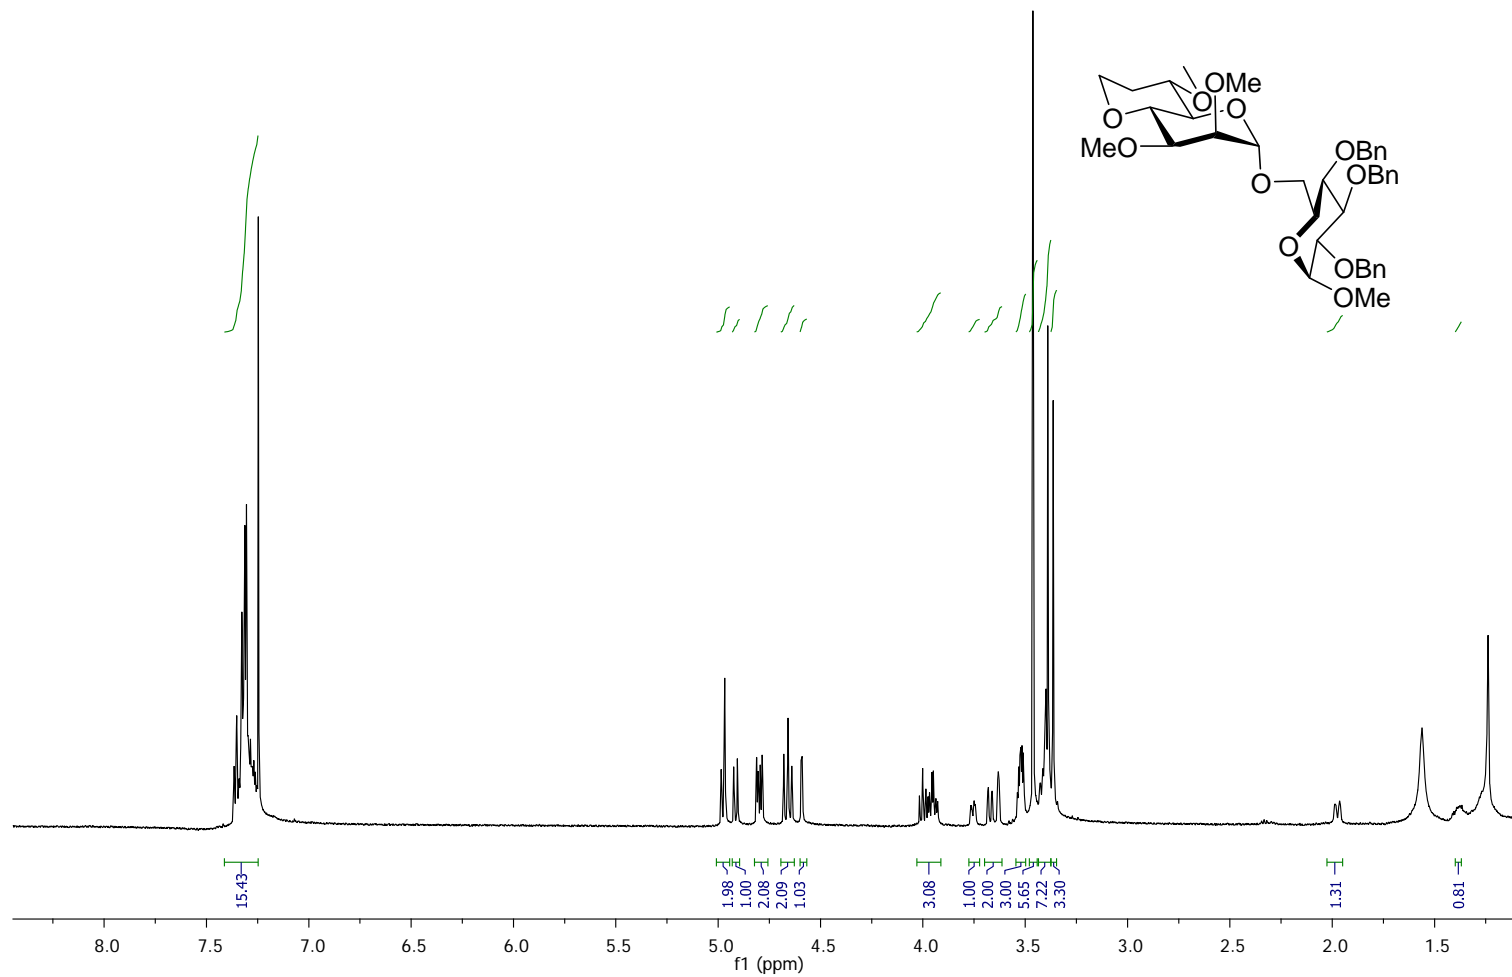

**<sup>13</sup>CNMR (150 MHz, CDCl<sub>3</sub>) of Methyl 4,8-anhydro-7-deoxy-2,3,6-tri-*O*-methyl-*L*-glycero- $\alpha$ -*D*-mannooctopyranosyl-(1 $\rightarrow$ 6)-2',3',4'-tri-*O*-benzyl- $\alpha$ -*D*-glucopyranoside (42 $\alpha$ )**

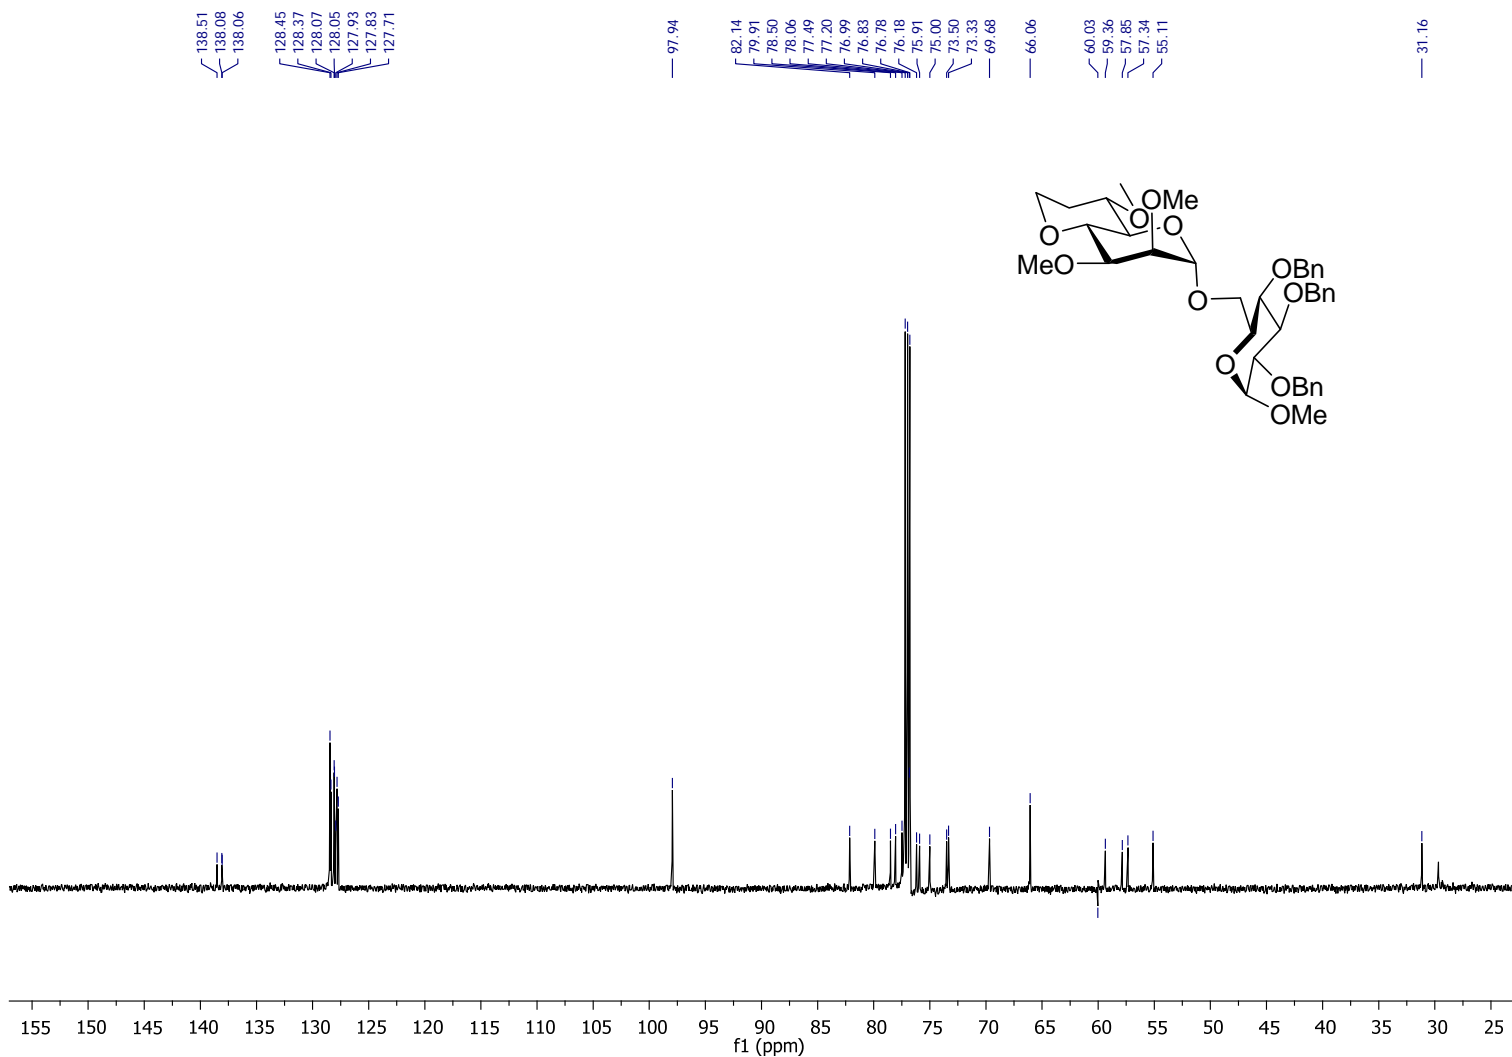

**<sup>1</sup>H NMR (400 MHz, CDCl<sub>3</sub>) of Methyl 4,8-anhydro-7-deoxy-2,3,6-tri-O-methyl-L-glycero-β-D-mannoctopyranosyl-(1→4)-2',3',6'-tri-O-benzyl-α-D-glucopyranoside (43β)**

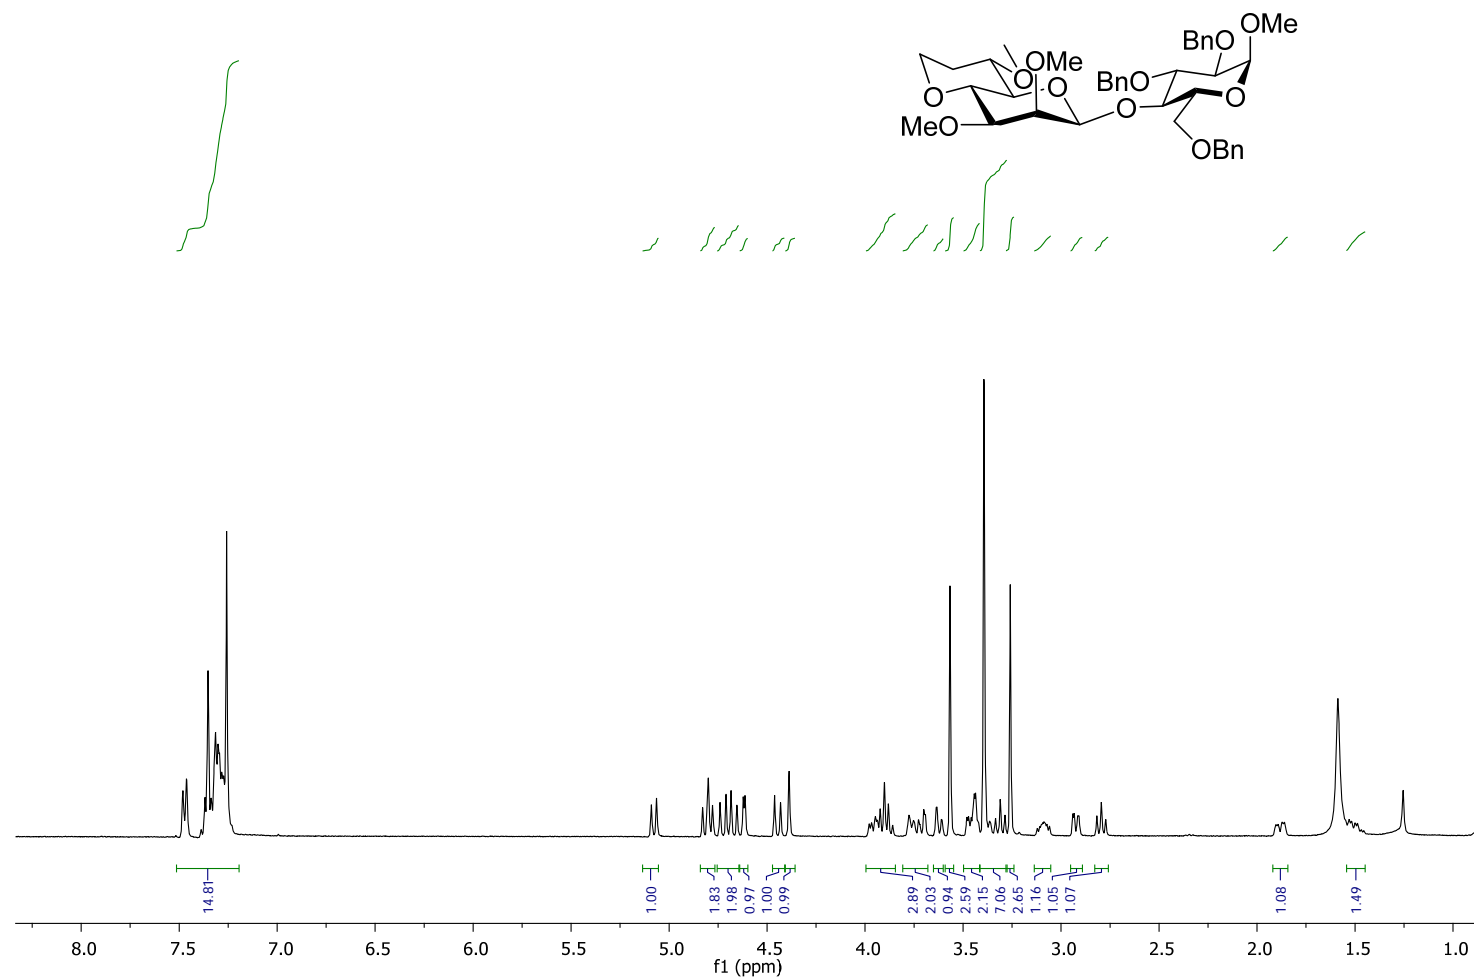

**$^{13}\text{C}$  NMR (100 MHz,  $\text{CDCl}_3$ ) of Methyl 4,8-anhydro-7-deoxy-2,3,6-tri-*O*-methyl-L-glycero- $\beta$ -D-mannoctopyranosyl-(1 $\rightarrow$ 4)-2',3',6'-tri-*O*-benzyl- $\alpha$ -D-glucopyranoside (43 $\beta$ )**

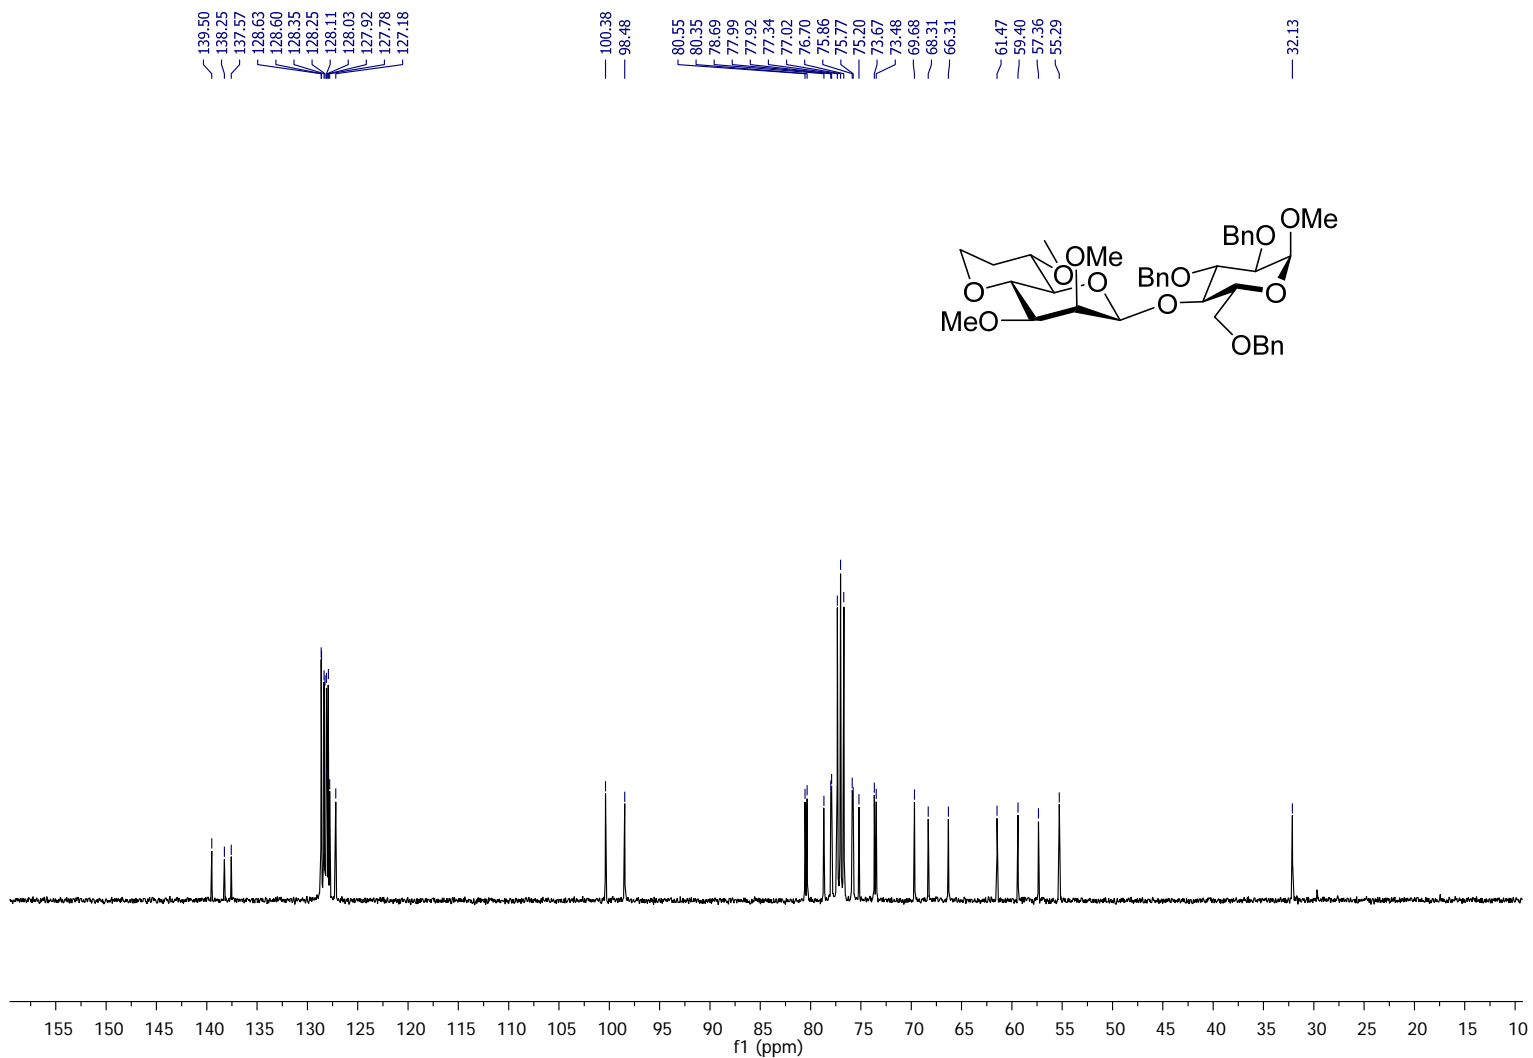

**<sup>1</sup>H NMR (400 MHz, CDCl<sub>3</sub>) of Methyl 4,8-anhydro-7-deoxy-2,3,6-tri-*O*-methyl-L-glycero- $\alpha$ -D-mannoctopyranosyl-(1 $\rightarrow$ 4)-2',3',6'-tri-*O*-benzyl- $\alpha$ -D-glucopyranoside (43 $\alpha$ )**

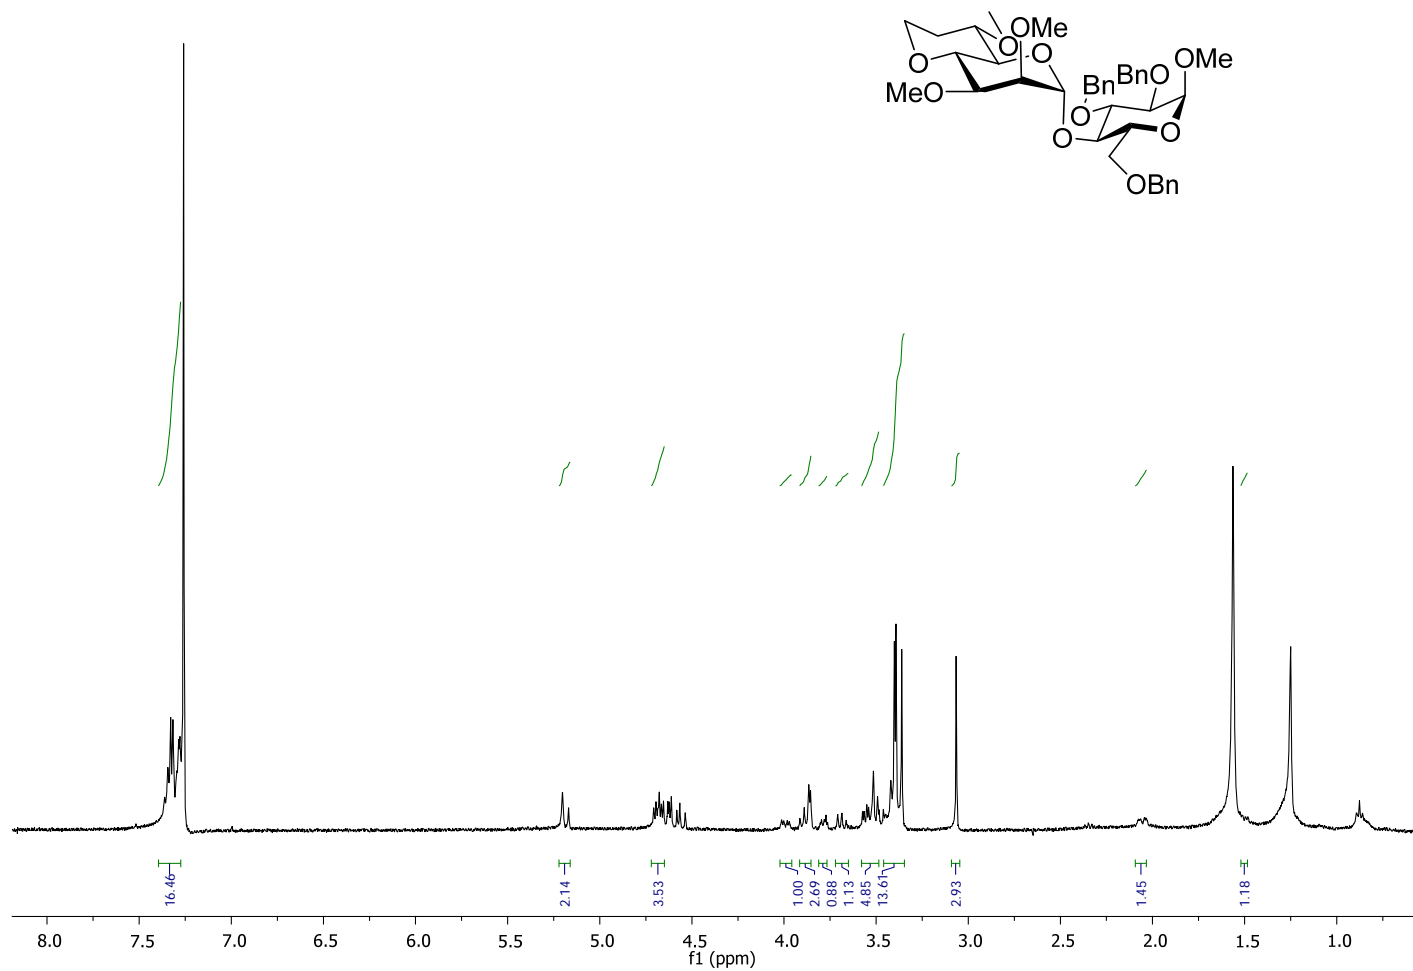

**<sup>13</sup>C NMR (150 MHz, CDCl<sub>3</sub>) Methyl 4,8-anhydro-7-deoxy-2,3,6-tri-*O*-methyl-L-glycero- $\alpha$ -D-mannoctopyranosyl-(1 $\rightarrow$ 4)-  
2',3',6'-tri-*O*-benzyl- $\alpha$ -D-glucopyranoside (43 $\alpha$ )**

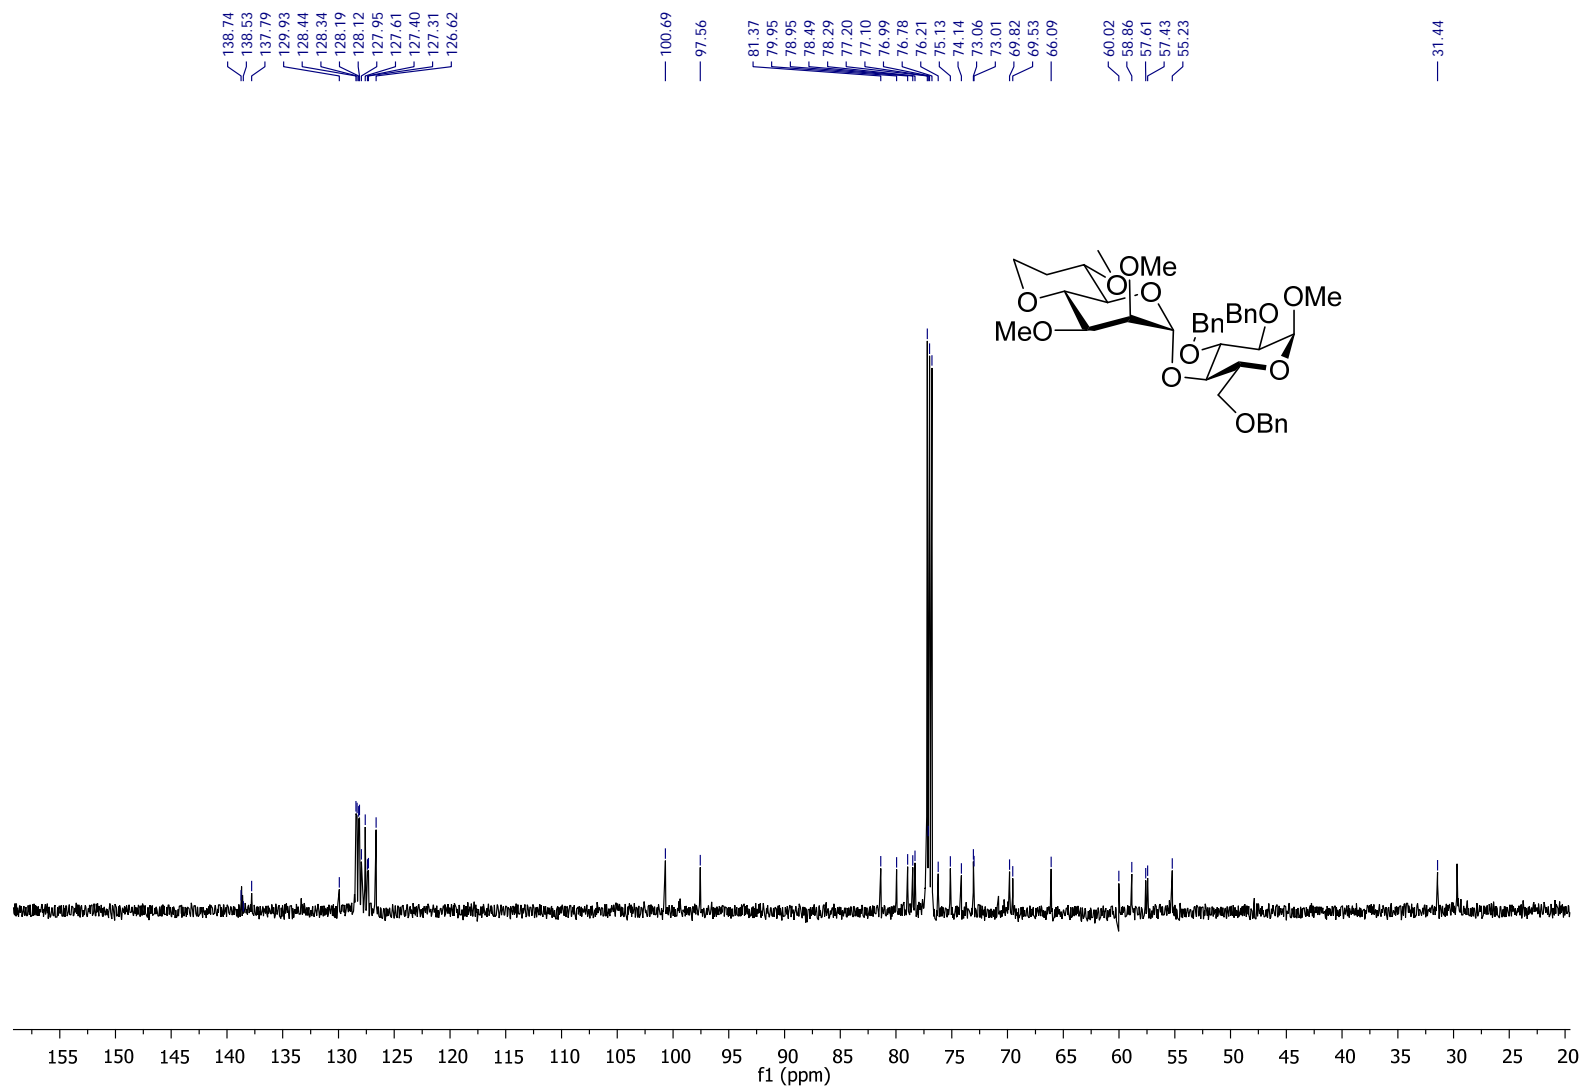



**<sup>1</sup>H NMR (400 MHz, CDCl<sub>3</sub>) of (1-Adamantanyl) 4,8-anhydro-7-deoxy-2,3,6-tri-*O*-methyl-L-glycero-β-D-mannoctopyranoside (44β)**

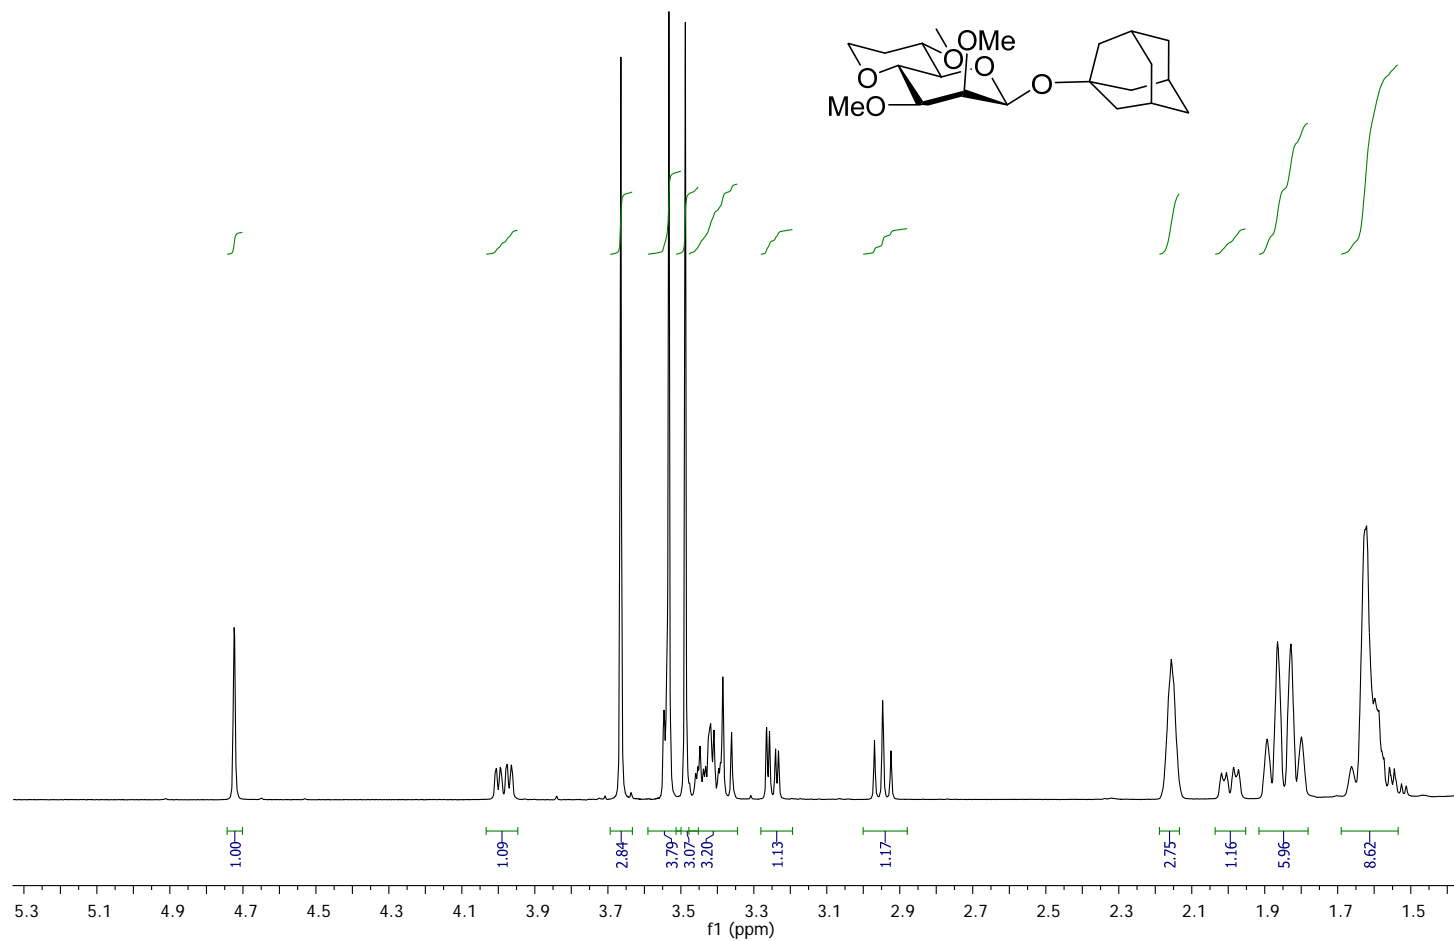

<sup>13</sup>C NMR (100 MHz, CDCl<sub>3</sub>) of (1-Adamantanyl) 4,8-anhydro-7-deoxy-2,3,6-tri-*O*-methyl-L-glycero-β-D-mannoctopyranoside  
(44β)

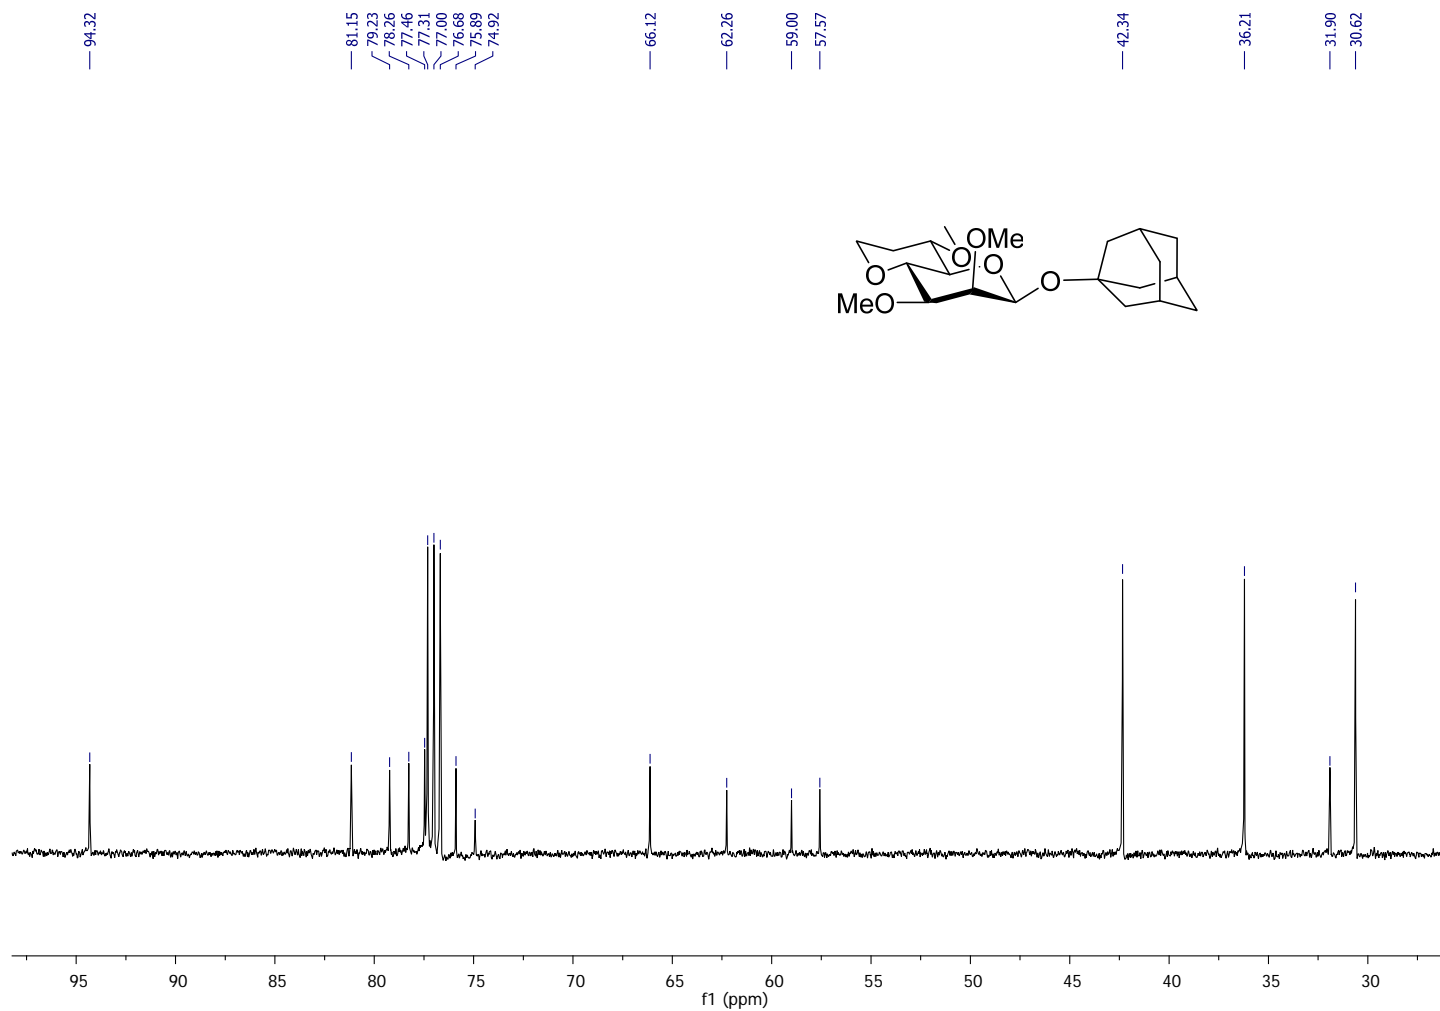

<sup>1</sup>H NMR (400 MHz, CDCl<sub>3</sub>) of (1-Adamantanyl) 4,8-anhydro-7-deoxy-2,3,6-tri-O-methyl-L-glycero- $\alpha$ -D-mannoctopyranoside  
(44 $\alpha$ )

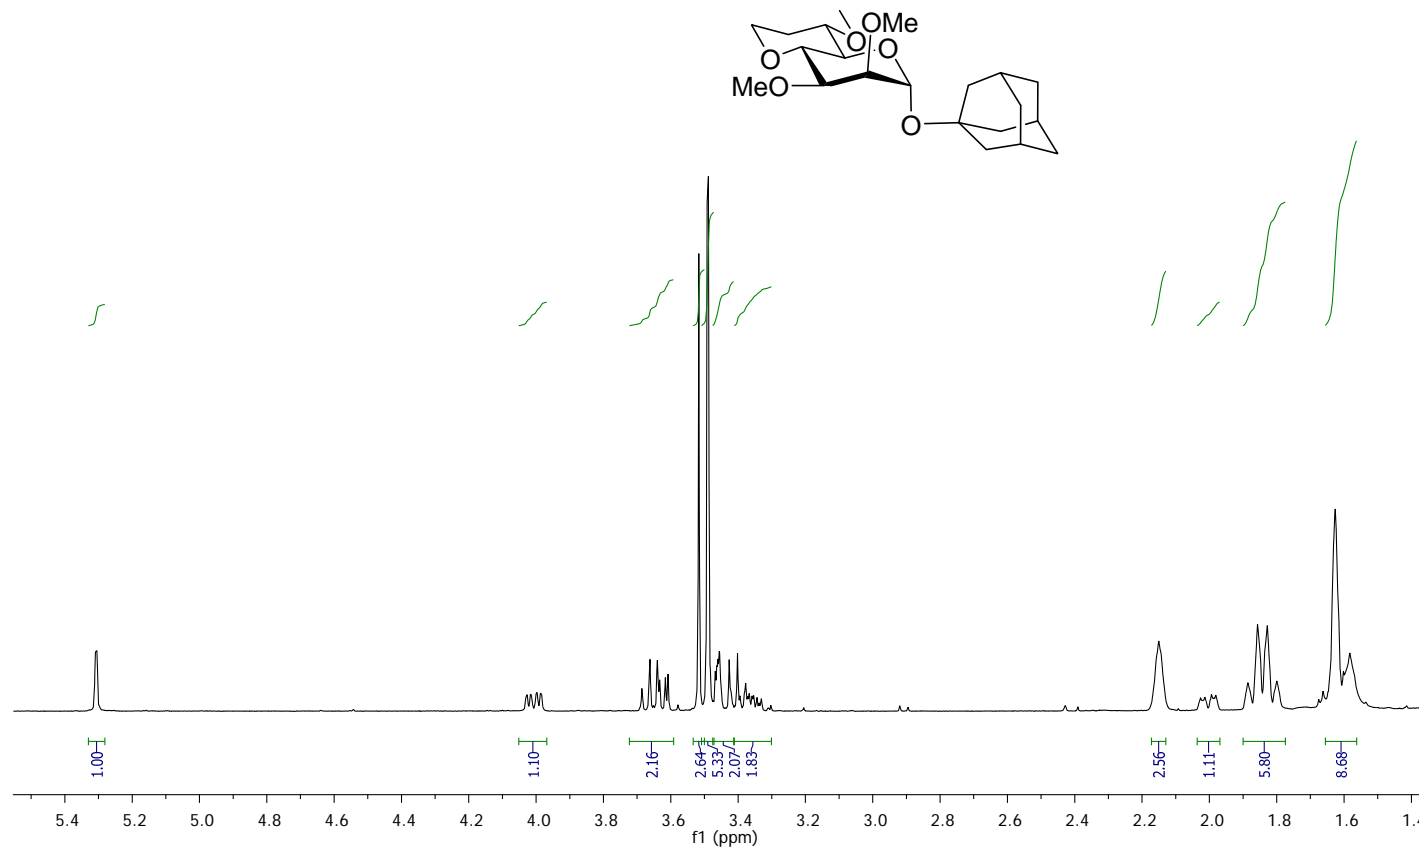

<sup>13</sup>C NMR (100 MHz, CDCl<sub>3</sub>) of (1-Adamantanyl) 4,8-anhydro-7-deoxy-2,3,6-tri-*O*-methyl-L-glycero- $\alpha$ -D-mannoctopyranoside  
(44 $\alpha$ )

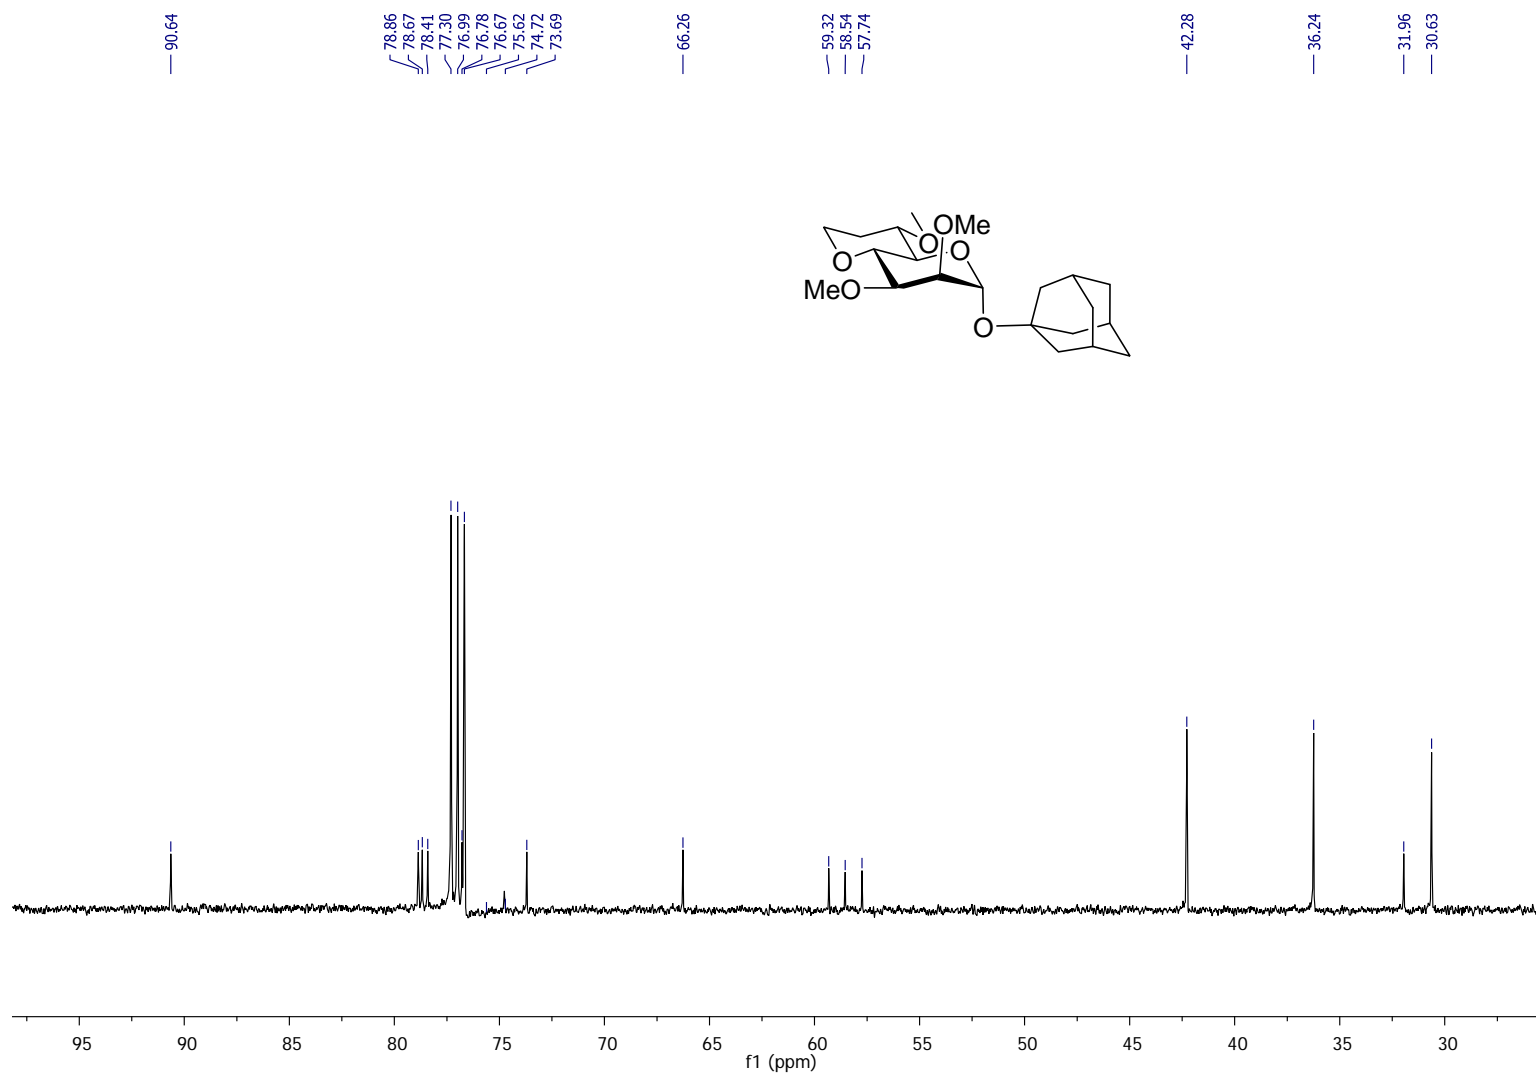

**<sup>1</sup>H NMR (400 MHz, CDCl<sub>3</sub>) of Methyl 4,6-*O*-benzylidene-7-deoxy-2,3-di-*O*-methyl-L-glycero-β-D-mannohetpopyranosyl-(1→6)-2',3',4'-tri-*O*-benzyl-α-D-glucopyranoside (45β)**

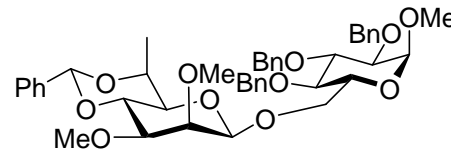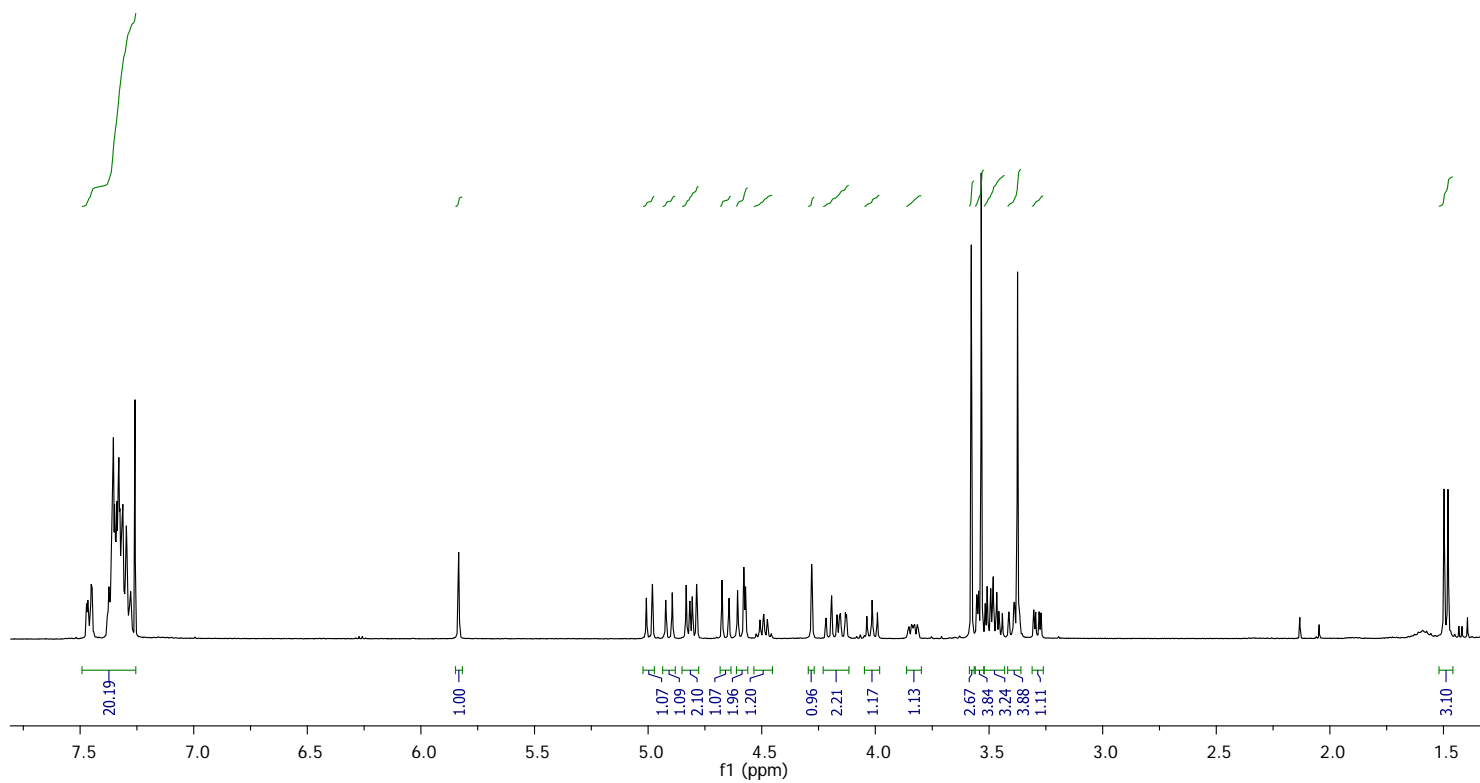

<sup>13</sup>C NMR (100 MHz, CDCl<sub>3</sub>) of Methyl 4,6-*O*-benzylidene-7-deoxy-2,3-di-*O*-methyl-L-glycero-β-D-mannohetpopyranosyl-(1→6)-2',3',4'-tri-*O*-benzyl-α-D-glucopyranoside (45β)

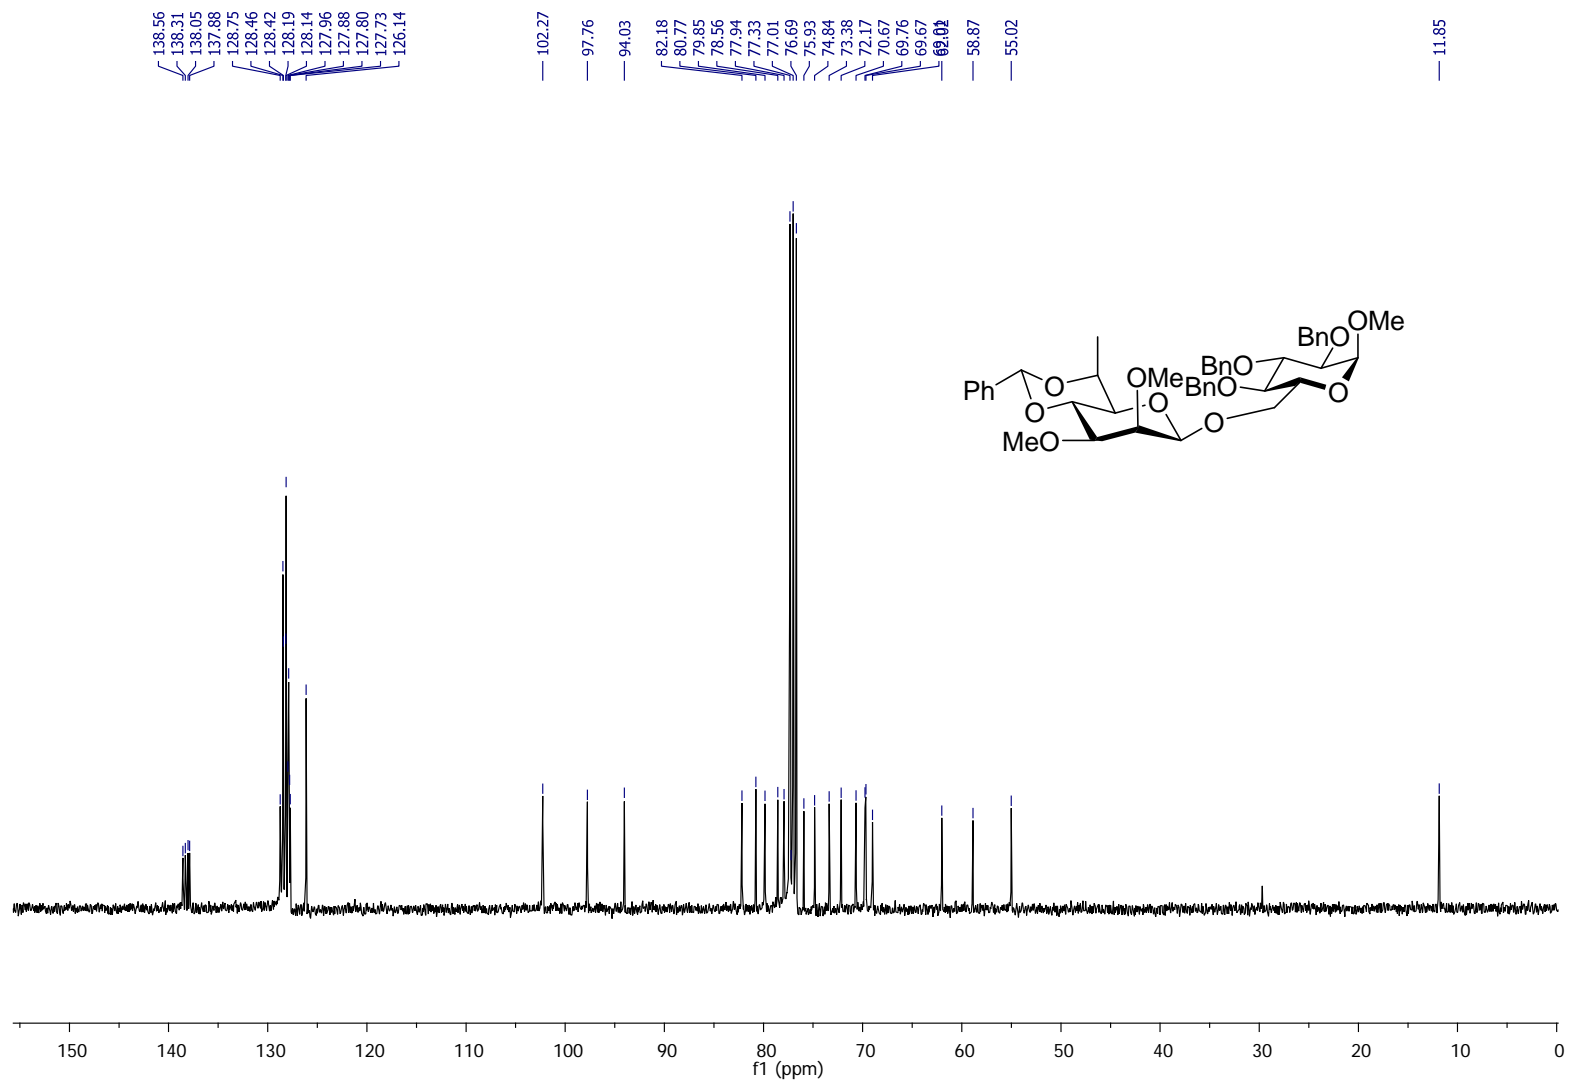

$^1\text{H}$  NMR (400 MHz,  $\text{CDCl}_3$ ) of Methyl 4,6-*O*-benzylidene-7-deoxy-2,3-di-*O*-methyl-L-glycero- $\alpha$ -D-mannohetpopyranosyl-(1 $\rightarrow$ 6)-2',3',4'-tri-*O*-benzyl- $\alpha$ -D-glucopyranoside (45 $\alpha$ )

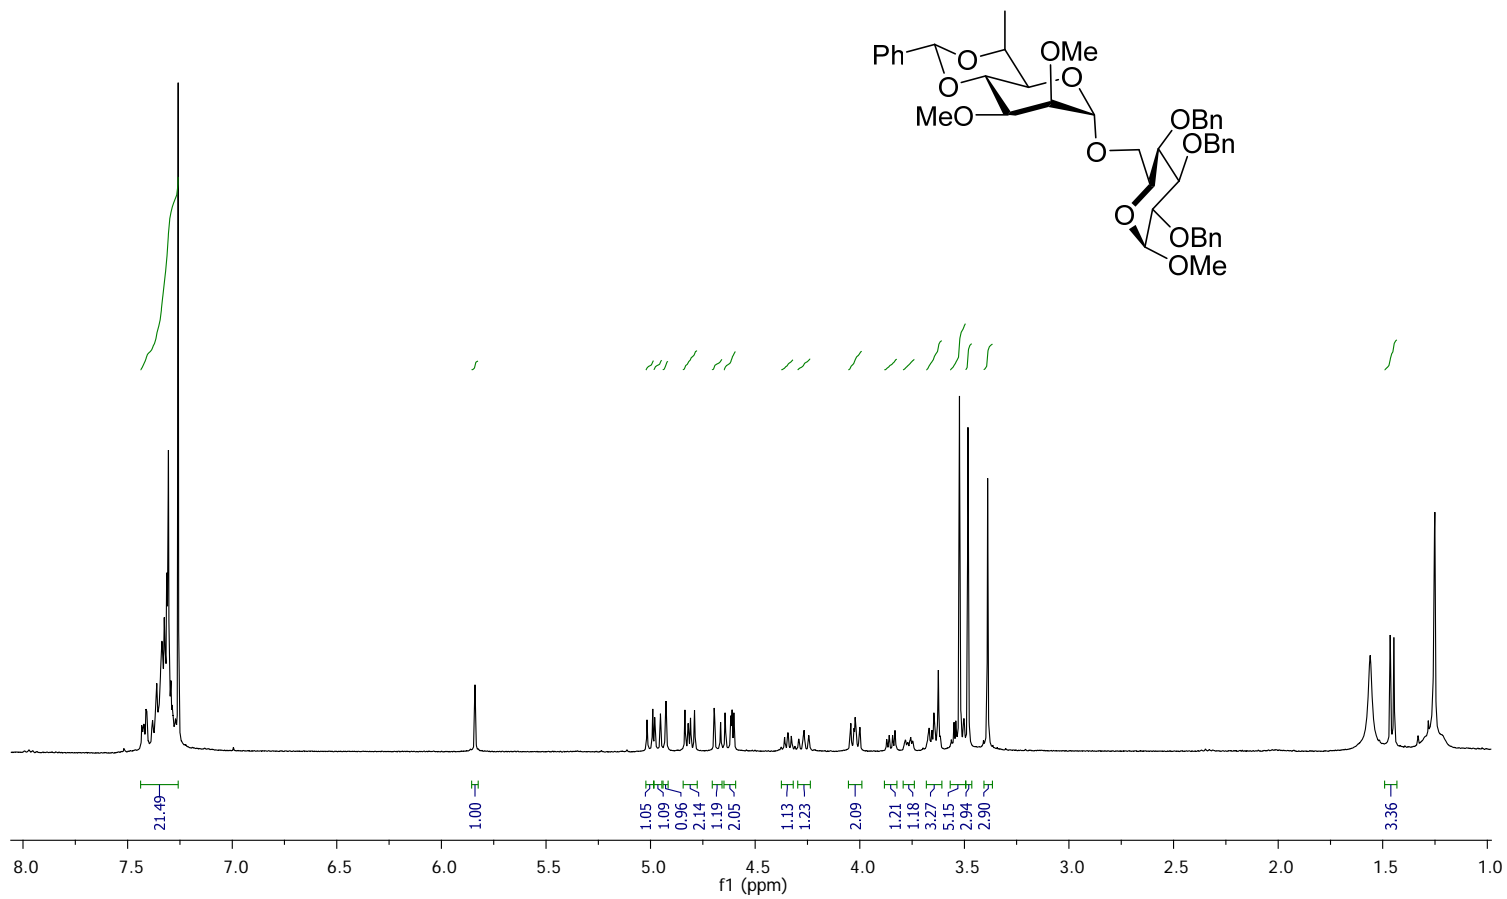

**$^{13}\text{C}$  NMR (100 MHz,  $\text{CDCl}_3$ ) of Methyl 4,6-*O*-benzylidene-7-deoxy-2,3-di-*O*-methyl-L-glycero- $\alpha$ -D-mannohetpopyranosyl-(1 $\rightarrow$ 6)-2',3',4'-tri-*O*-benzyl- $\alpha$ -D-glucopyranoside (45 $\alpha$ )**

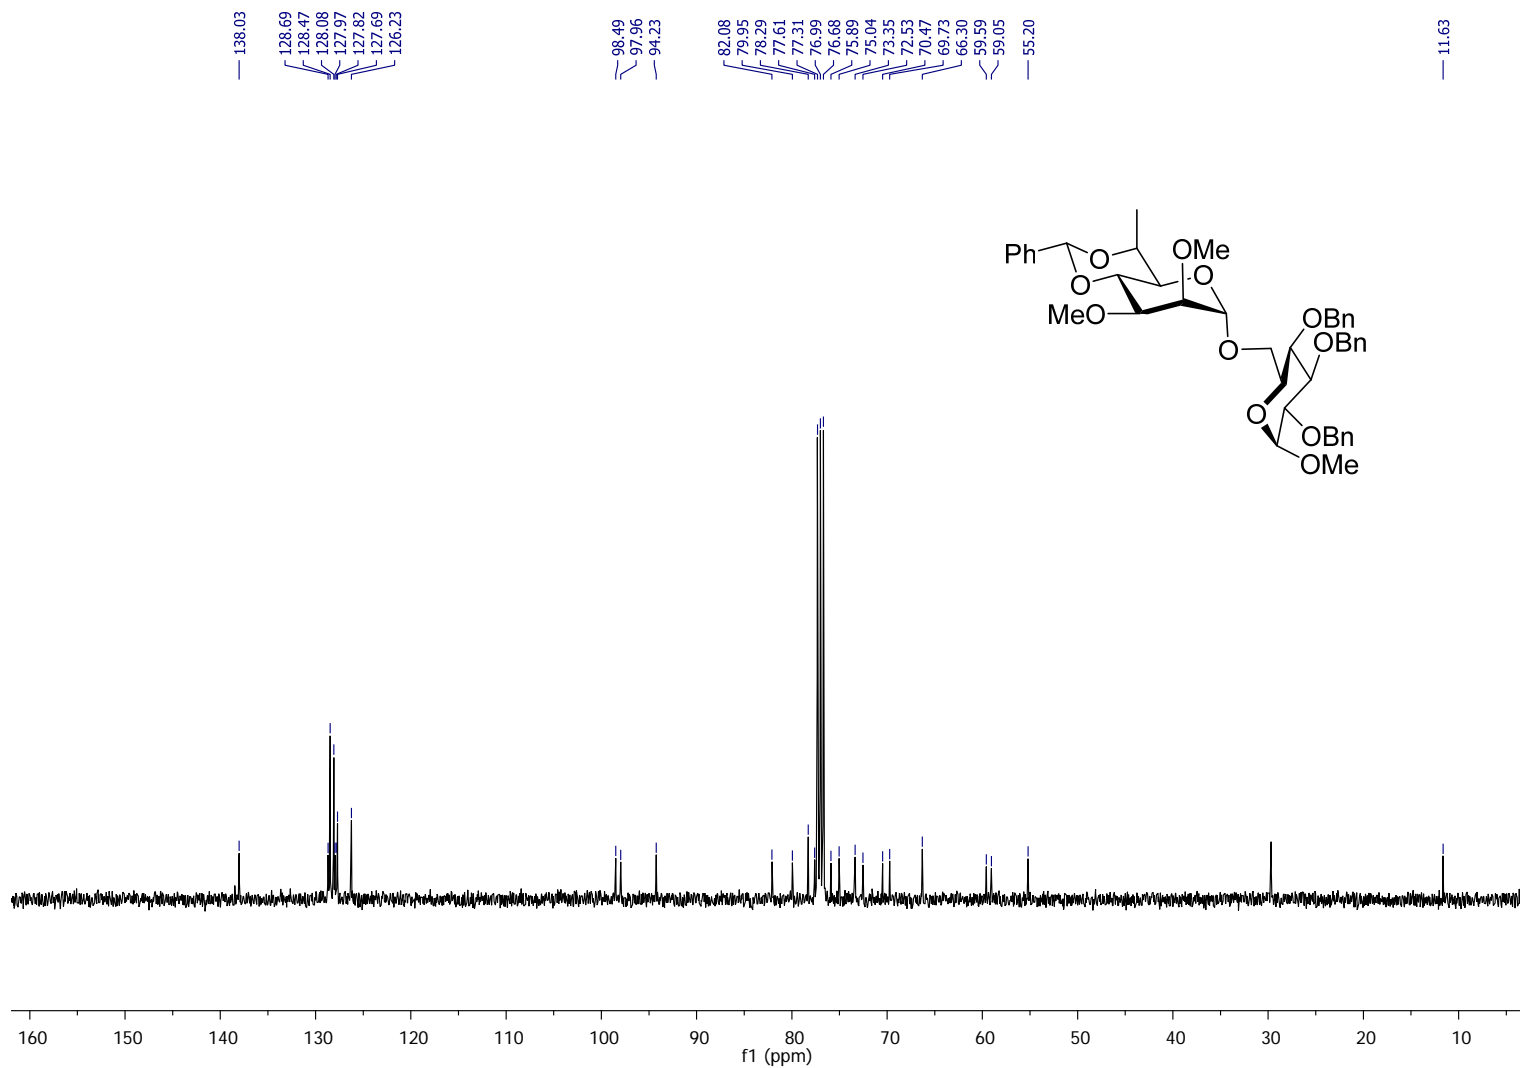



**$^1\text{H}$  NMR (400 MHz,  $\text{CDCl}_3$ ) of Methyl 4,6-*O*-benzylidene-7-deoxy-2,3-di-*O*-methyl-L-glycero- $\beta$ -D-mannohetpopyranosyl-(1 $\rightarrow$ 4)-2',3',6'-tri-*O*-benzyl- $\alpha$ -D-glucopyranoside (46 $\beta$ )**

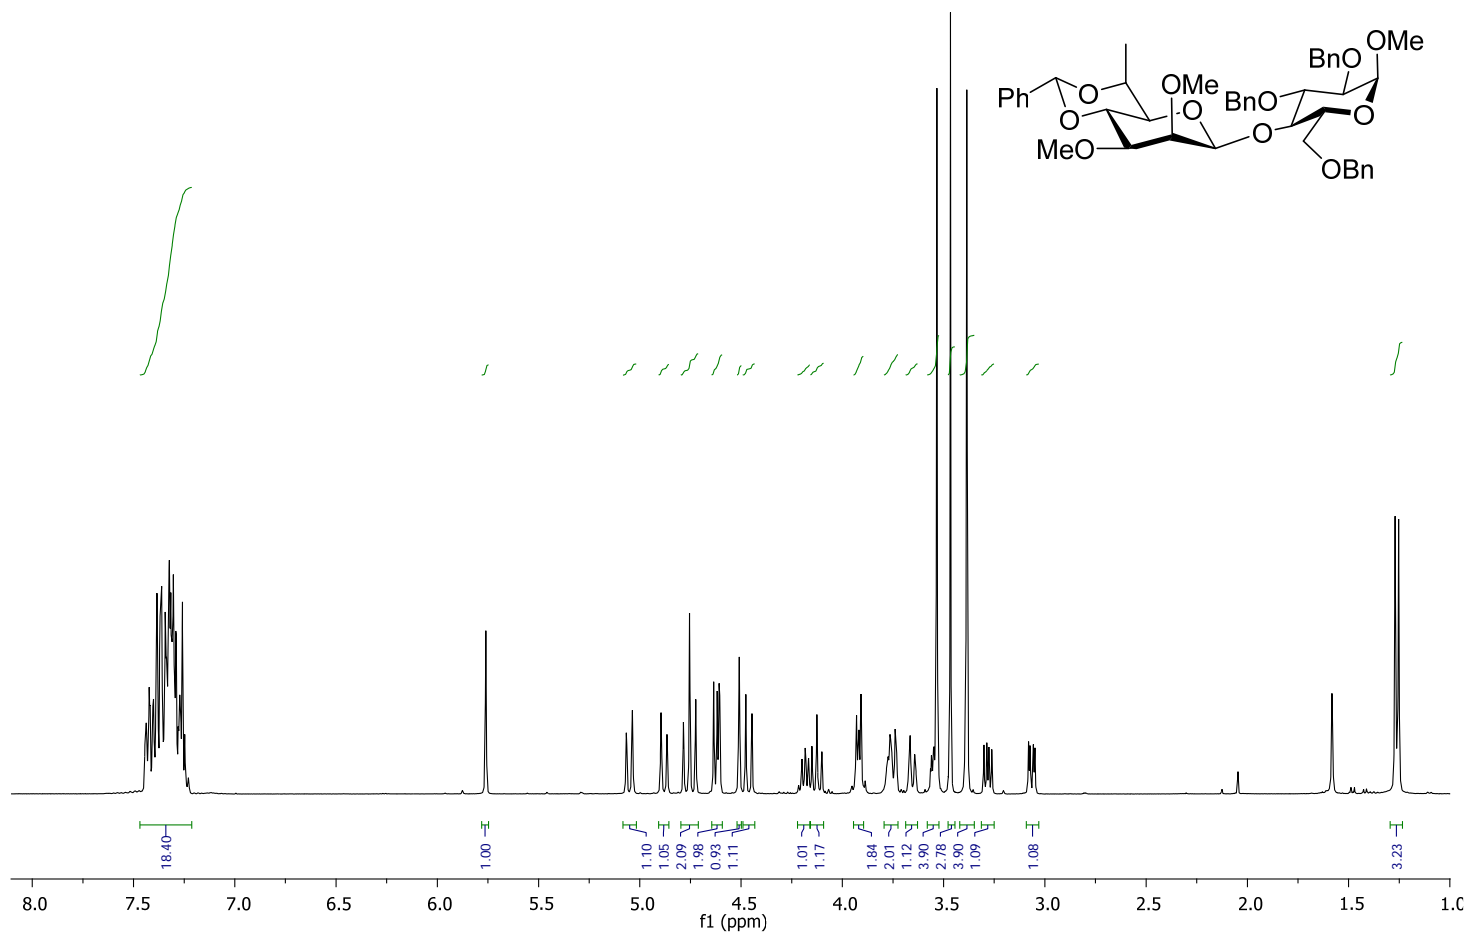

**$^{13}\text{C}$  NMR (100 MHz,  $\text{CDCl}_3$ ) of Methyl 4,6-*O*-benzylidene-7-deoxy-2,3-di-*O*-methyl-L-glycero- $\beta$ -D-mannohetpopyranosyl-(1 $\rightarrow$ 4)-2',3',6'-tri-*O*-benzyl- $\alpha$ -D-glucopyranoside (46 $\beta$ )**

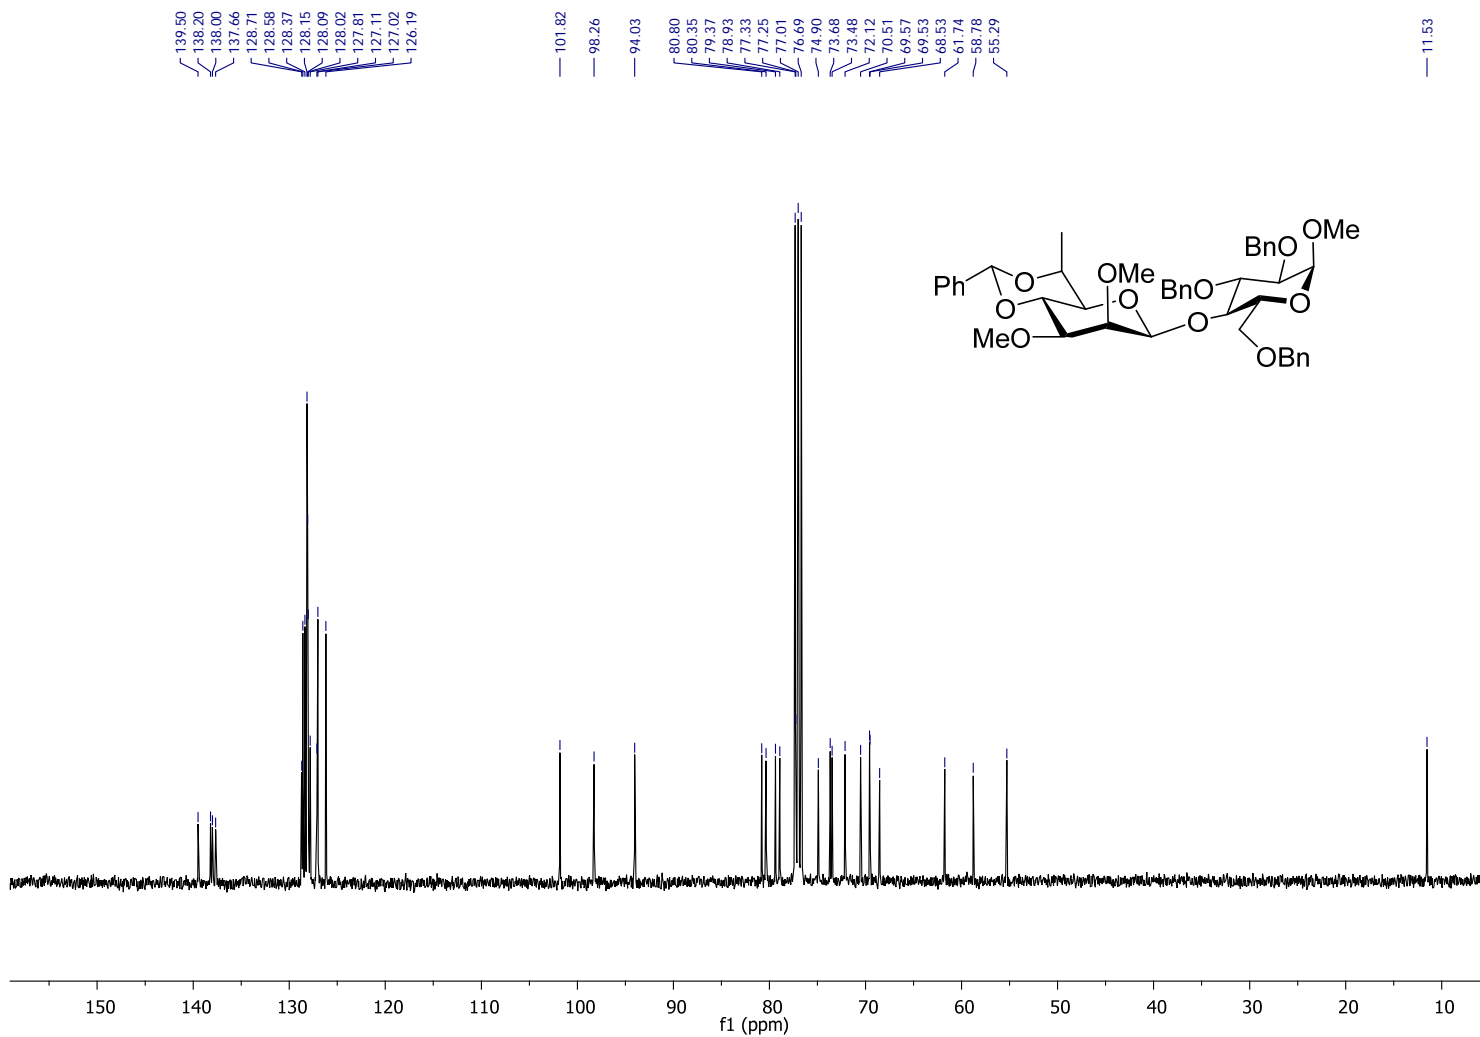

**<sup>1</sup>H NMR (400 MHz, CDCl<sub>3</sub>) of (1-Adamantanyl) 4,6-*O*-benzylidene-7-deoxy-2,3-di-*O*-methyl-L-glycero-β-D-mannohetpopyranoside (47β)**

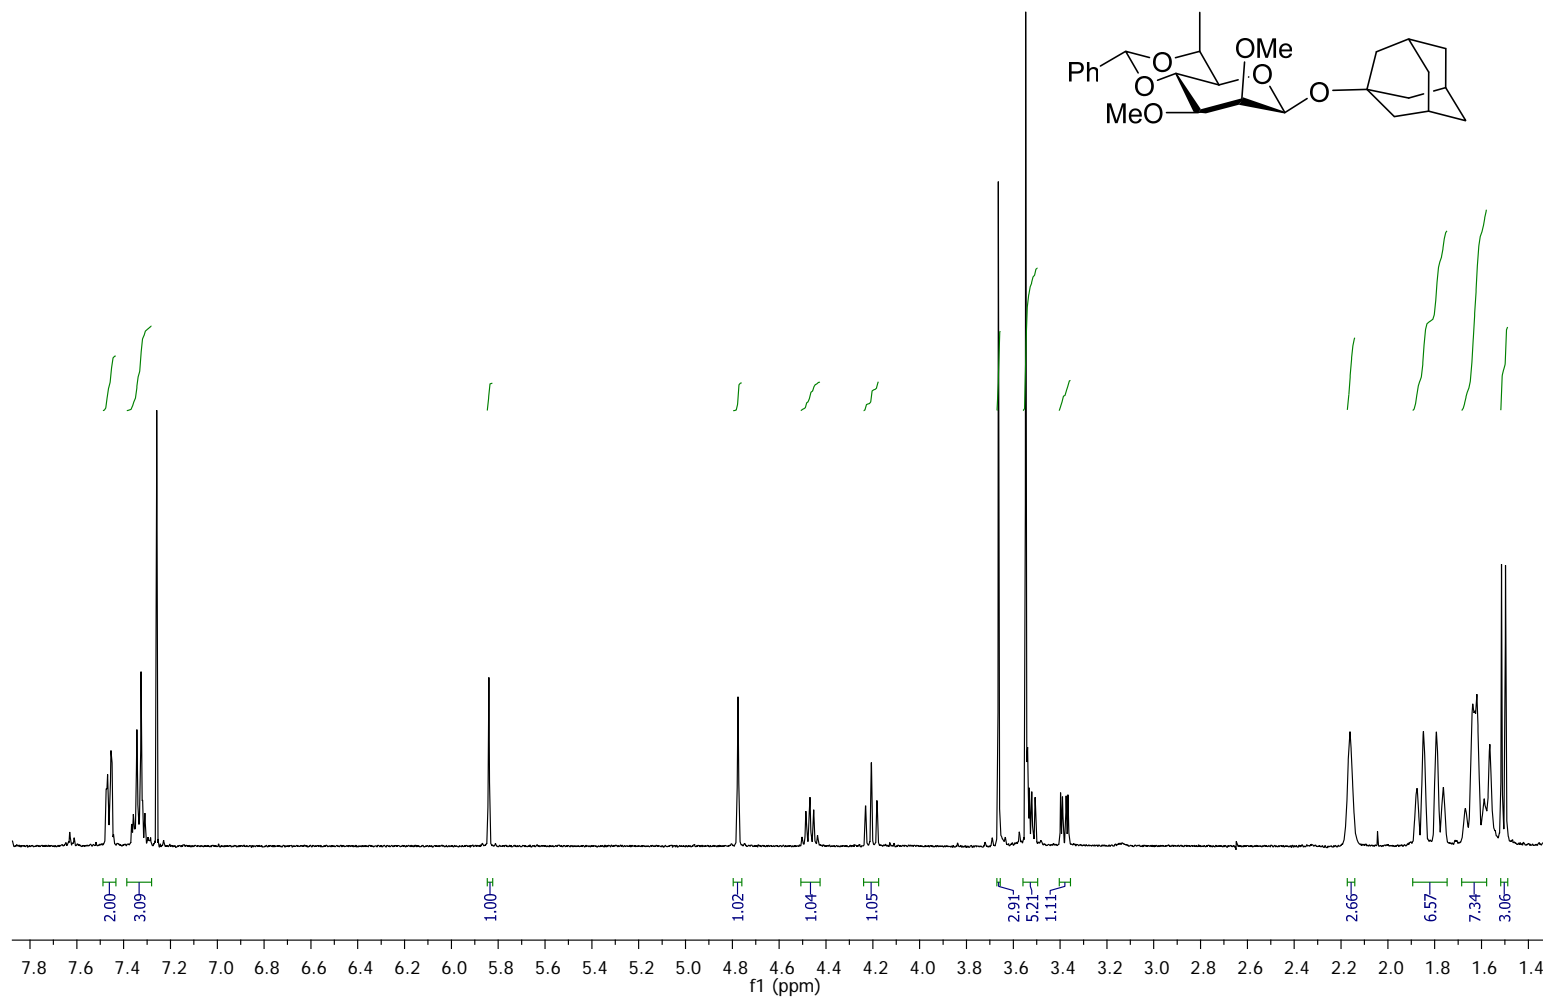

**$^{13}\text{C}$  NMR (100 MHz,  $\text{CDCl}_3$ ) of (1-Adamantanyl) 4,6-*O*-benzylidene-7-deoxy-2,3-di-*O*-methyl-L-glycero- $\beta$ -D-mannohetpopyranoside (47 $\beta$ )**

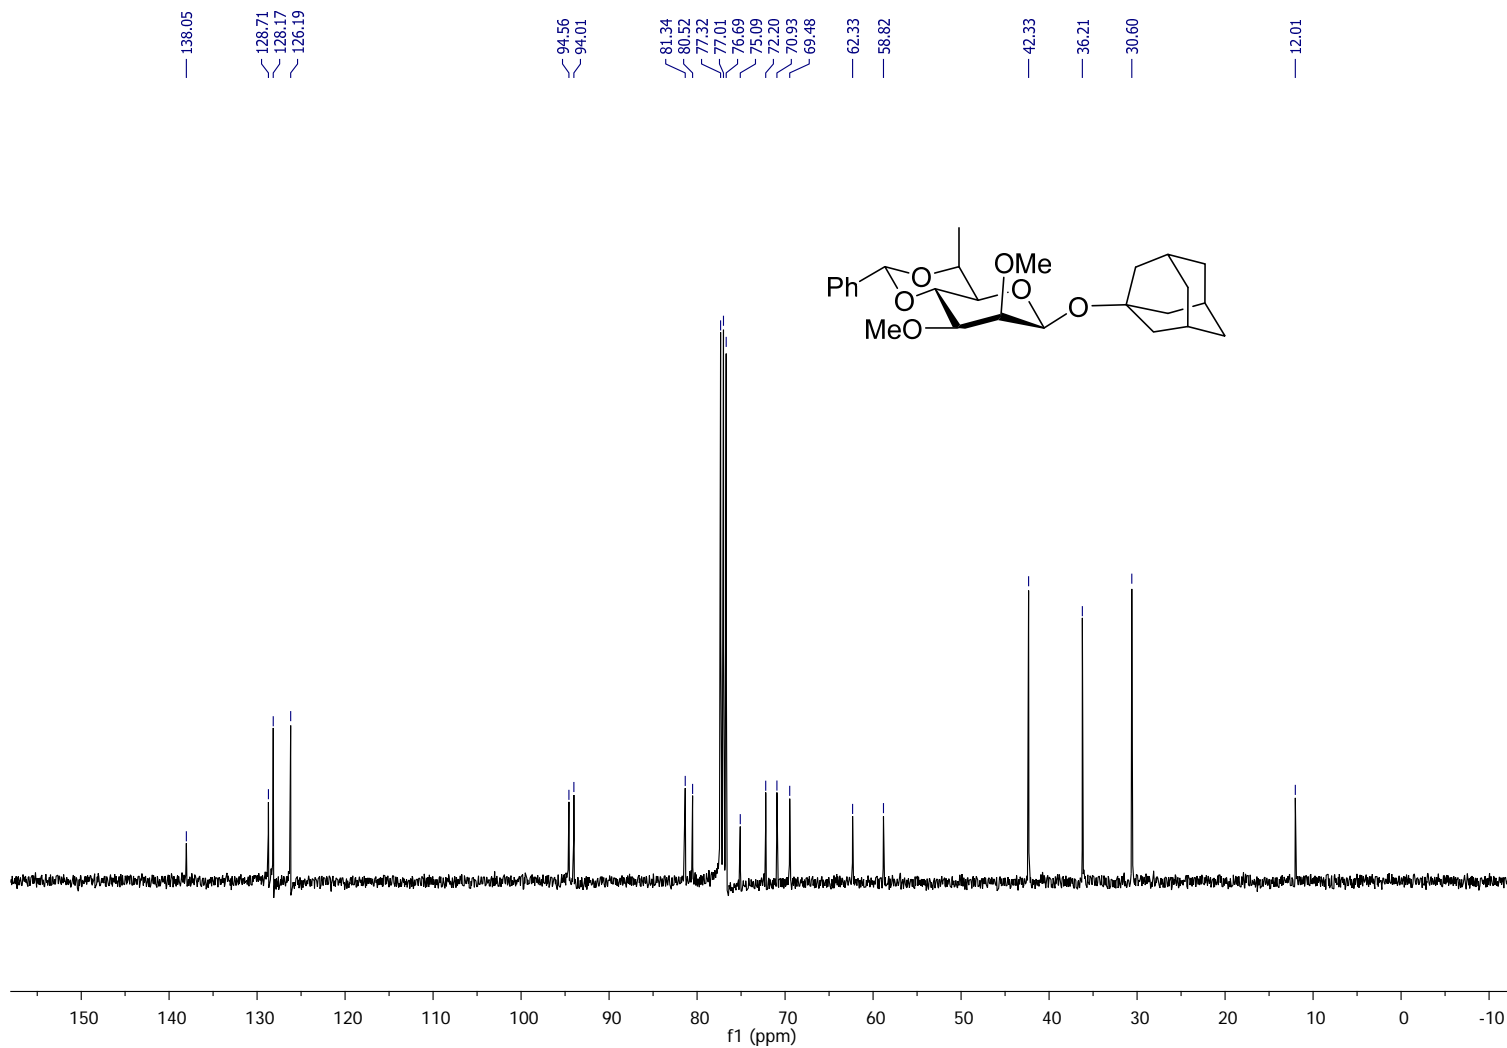

**$^1\text{H}$  NMR (400 MHz,  $\text{CDCl}_3$ ) of (1-Adamantanyl) 4,6-*O*-benzylidene-7-deoxy-2,3-di-*O*-methyl-L-glycero- $\alpha$ -D-mannohetpopyranoside (47 $\alpha$ )**

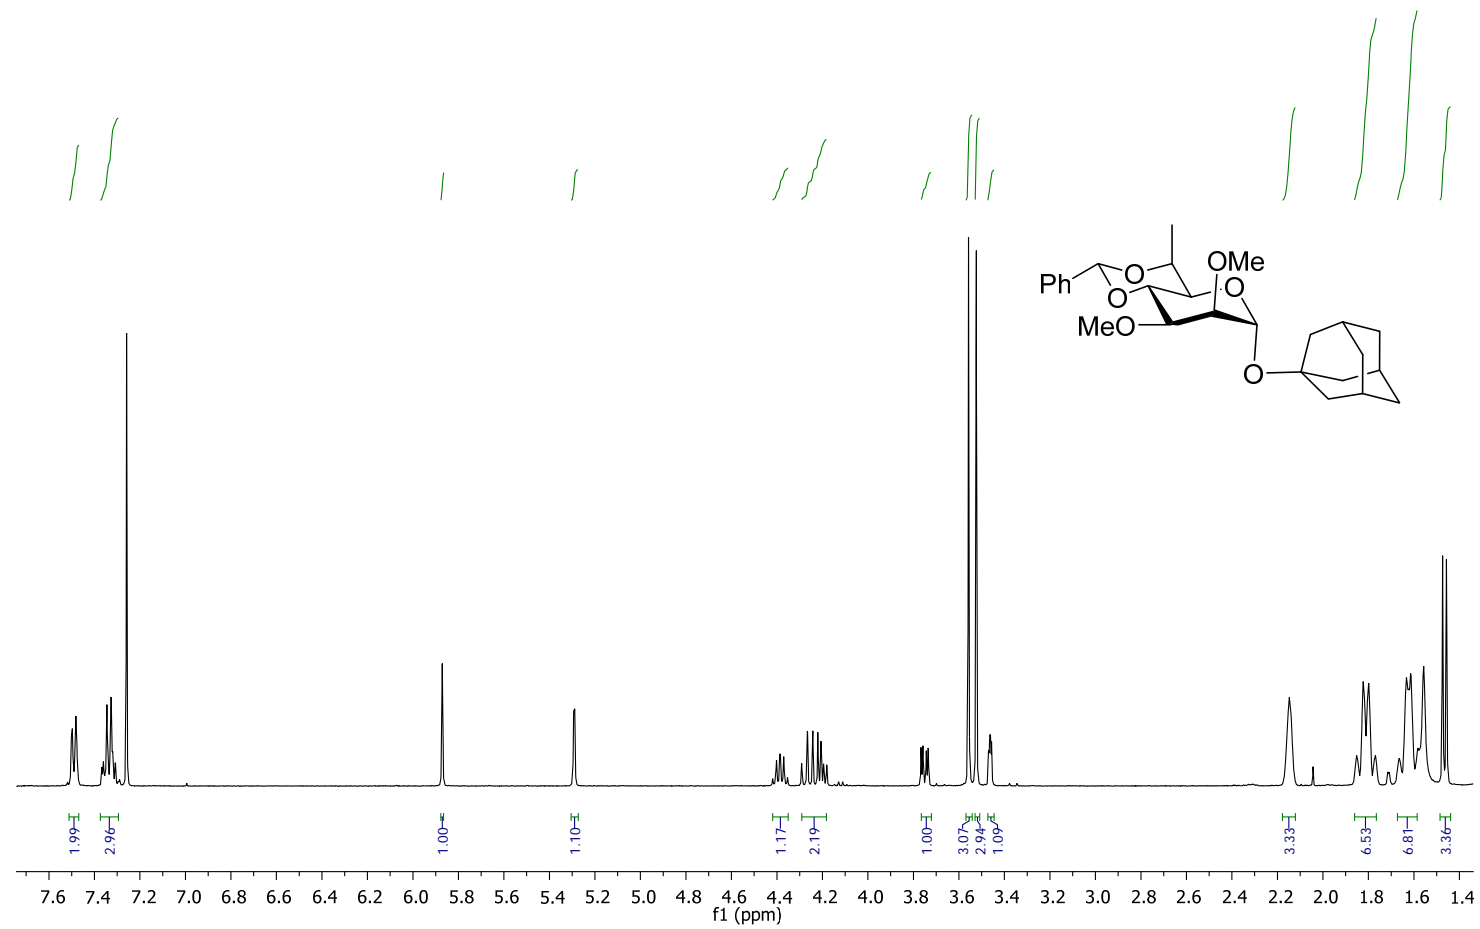

**$^{13}\text{C}$  NMR (100 MHz,  $\text{CDCl}_3$ ) of (1-Adamantanyl) 4,6-*O*-benzylidene-7-deoxy-2,3-di-*O*-methyl-L-glycero- $\alpha$ -D-mannohetpopyranoside (47 $\alpha$ )**

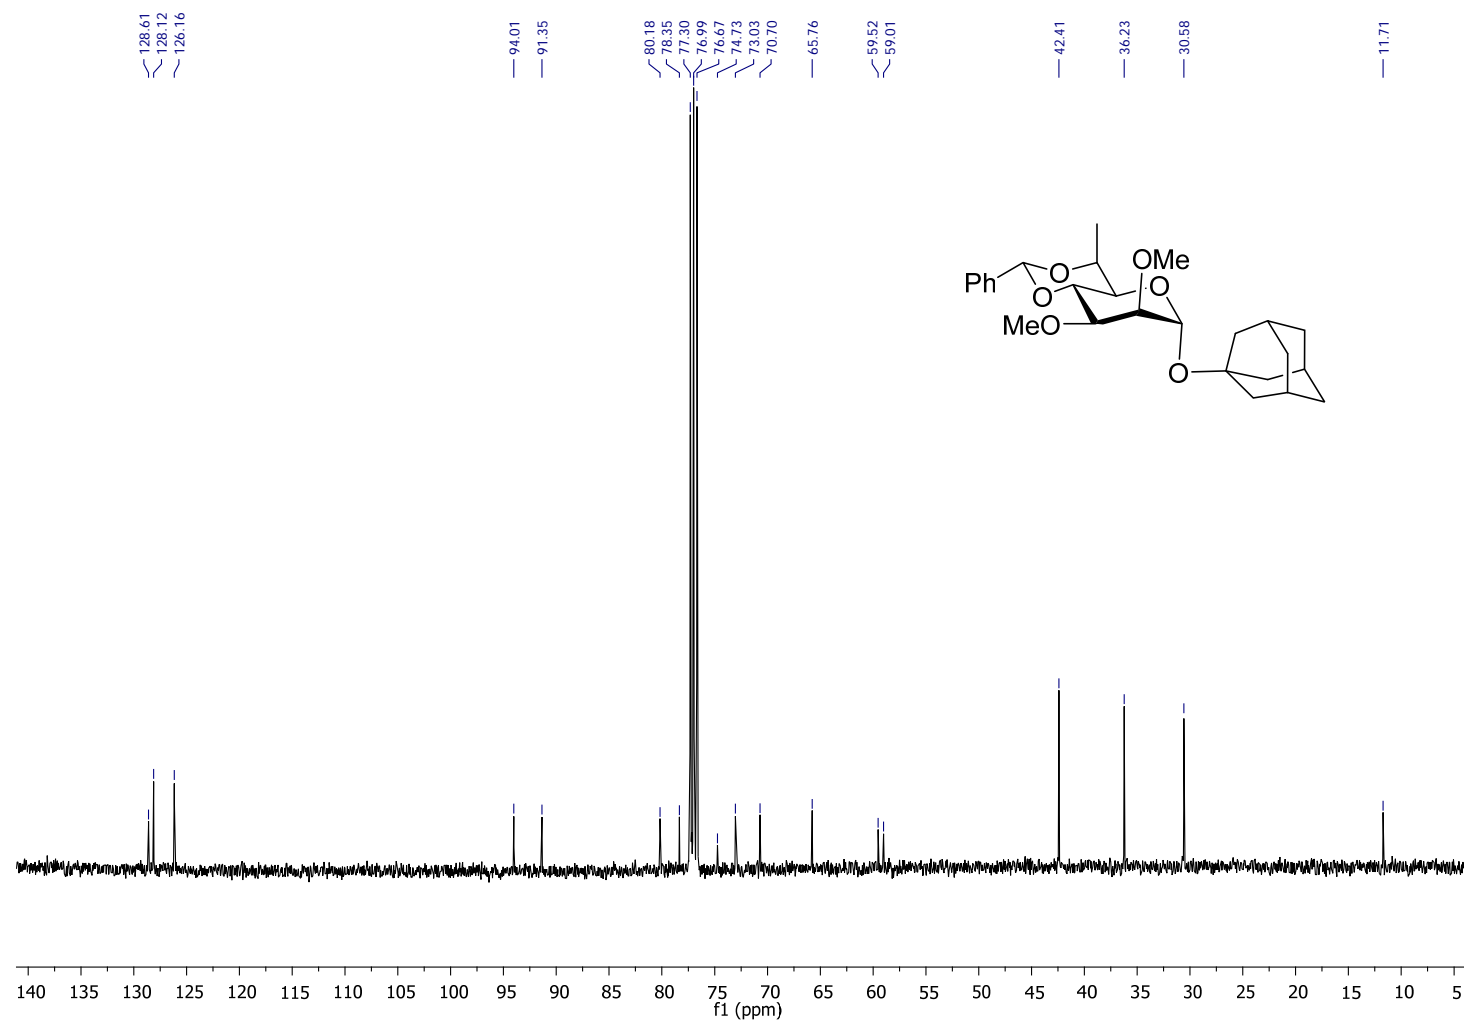

**$^1\text{H}$  NMR (600 MHz,  $\text{CDCl}_3$ ) of Methyl 4,6-*O*-benzylidene-7-deoxy-2,3-di-*O*-methyl-D-glycero- $\beta$ -D-mannohetpopyranosyl-(1 $\rightarrow$ 6)-2',3',4'-tri-*O*-benzyl- $\alpha$ -D-glucoopyranoside (48 $\beta$ )**

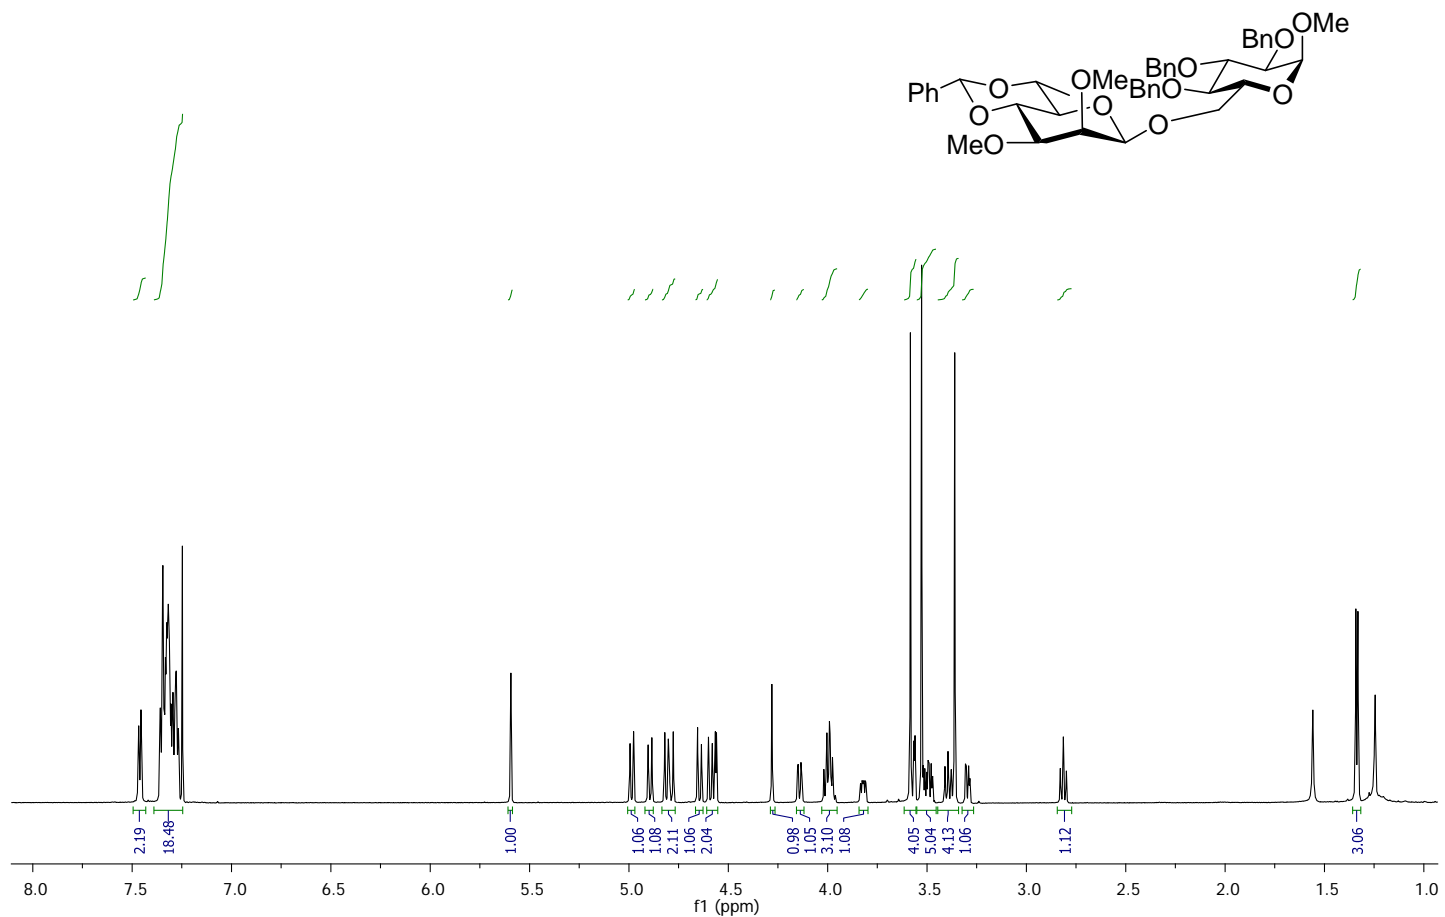

**$^{13}\text{C}$  NMR (150 MHz,  $\text{CDCl}_3$ ) of Methyl 4,6-*O*-benzylidene-7-deoxy-2,3-di-*O*-methyl- $\beta$ -D-mannohetpopyranosyl-(1 $\rightarrow$ 6)-2',3',4'-tri-*O*-benzyl- $\alpha$ -D-glucopyranoside (48 $\beta$ )**

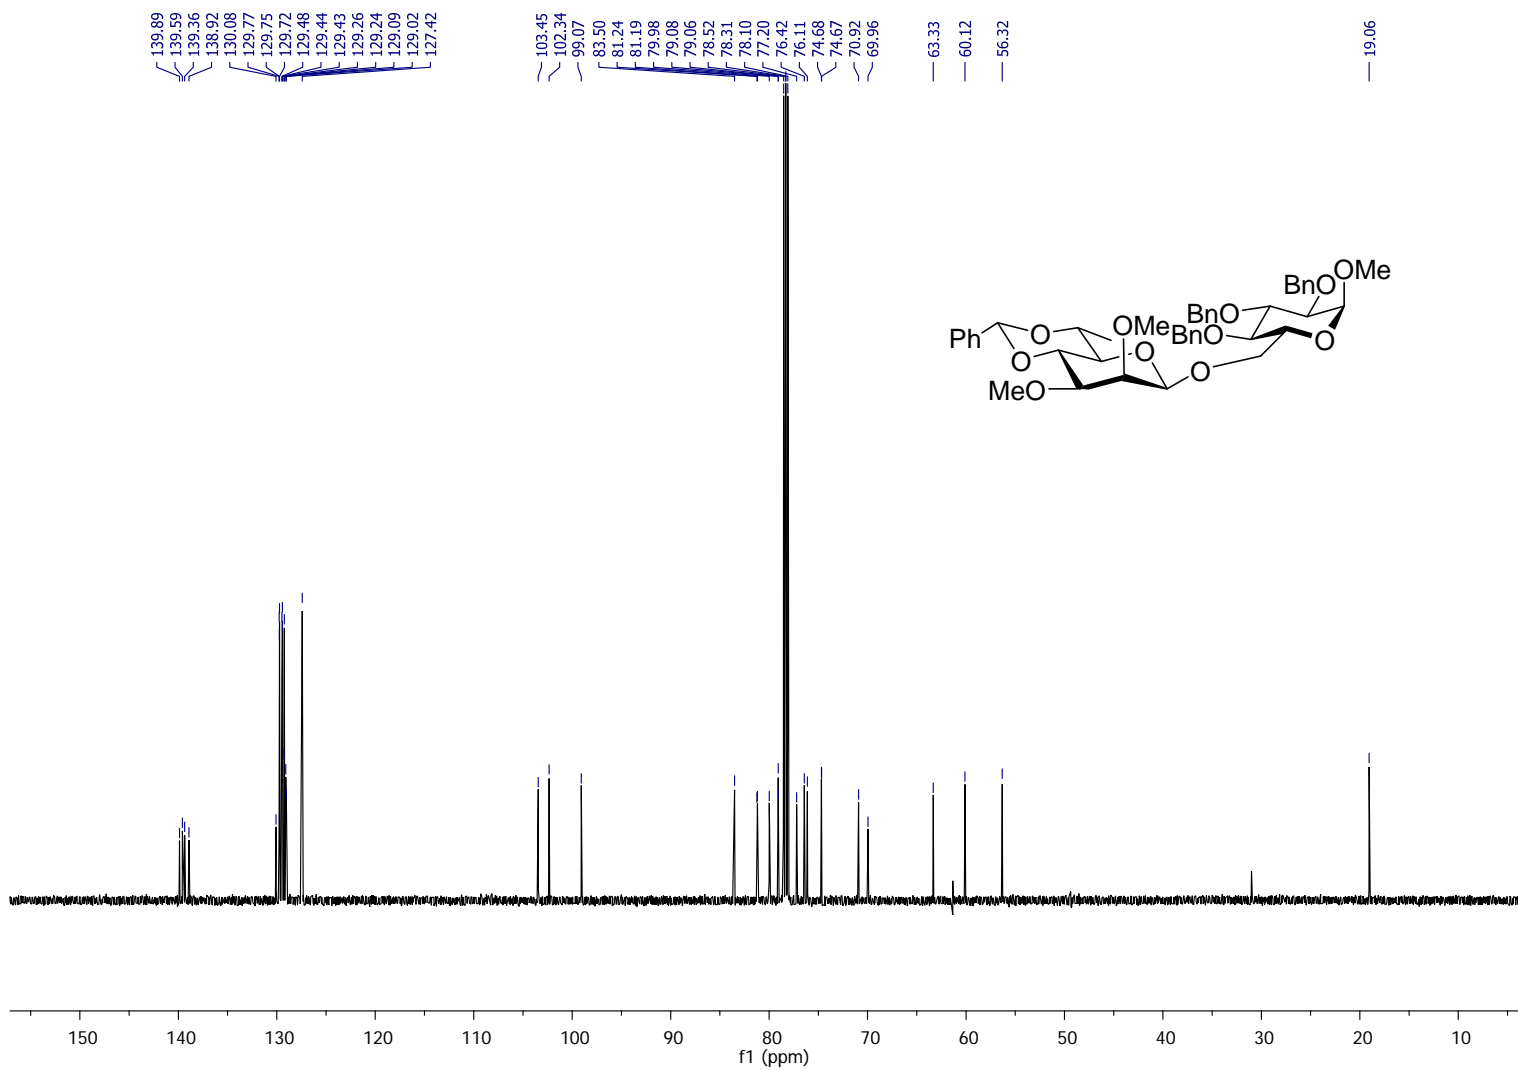



**<sup>1</sup>H NMR (600 MHz, CDCl<sub>3</sub>) of Methyl 4,6-*O*-benzylidene-7-deoxy-2,3-di-*O*-methyl-*D*-glycero- $\alpha$ -*D*-mannohetpopyranosyl-(1 $\rightarrow$ 6)-2',3',4'-tri-*O*-benzyl- $\alpha$ -*D*-glucopyranoside (48 $\alpha$ )**

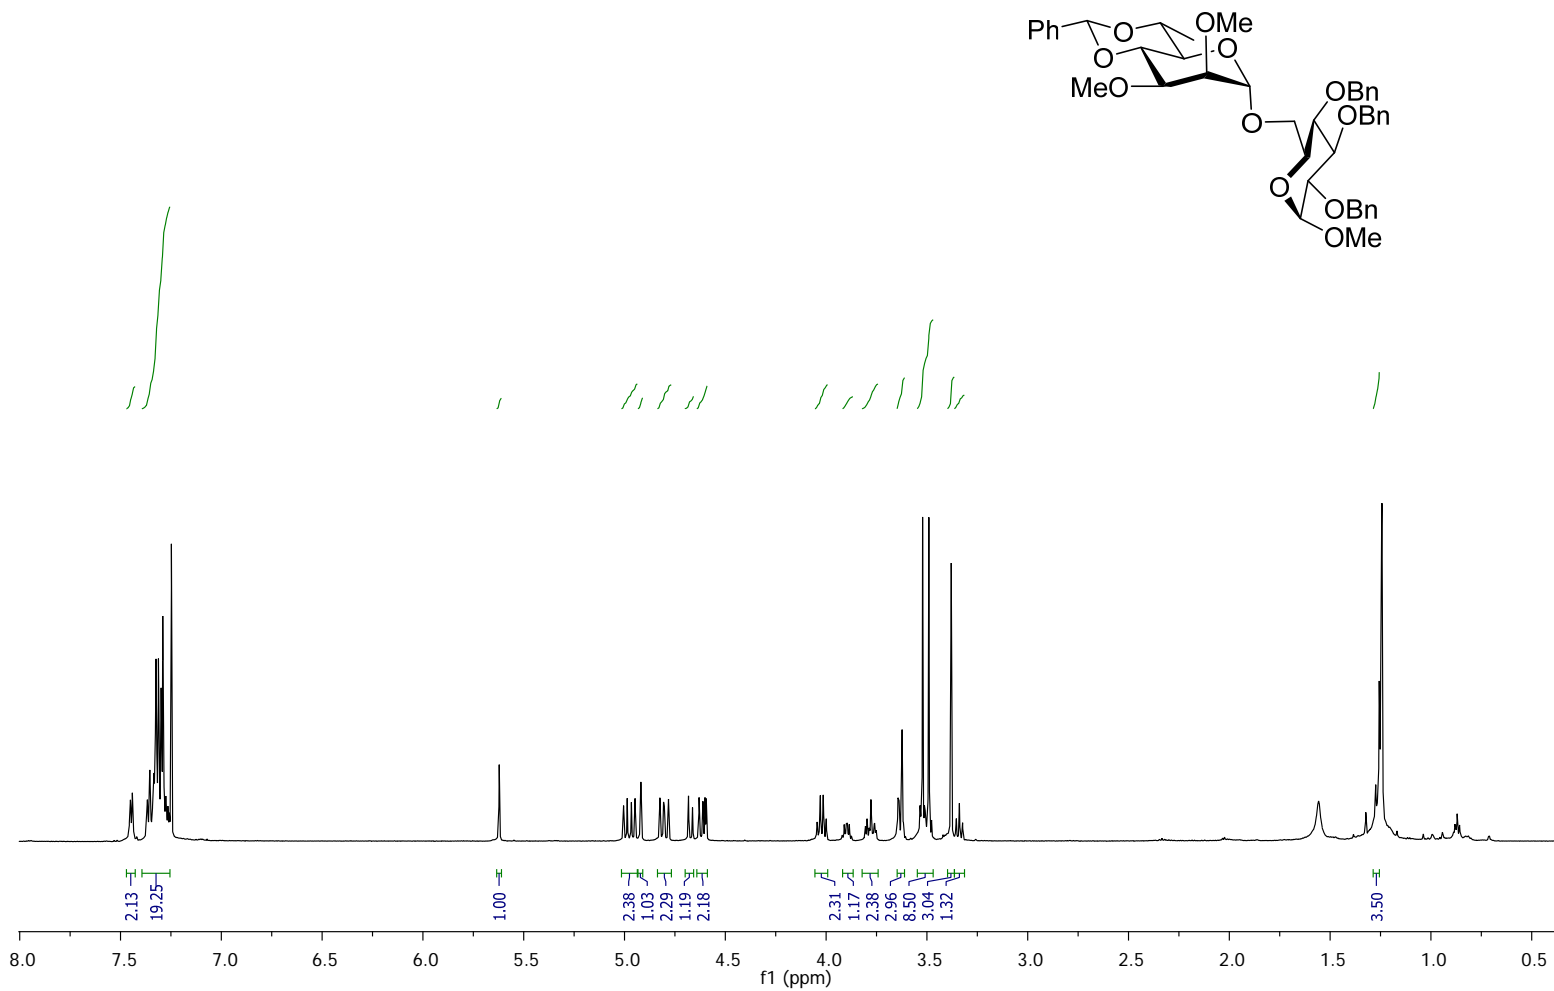

$^{13}\text{C}$  NMR (150 MHz,  $\text{CDCl}_3$ ) of Methyl 4,6-*O*-benzylidene-7-deoxy-2,3-di-*O*-methyl- $\alpha$ -D-mannohetpopyranosyl-(1 $\rightarrow$ 6)-2',3',4'-tri-*O*-benzyl- $\alpha$ -D-glucopyranoside (48 $\alpha$ )

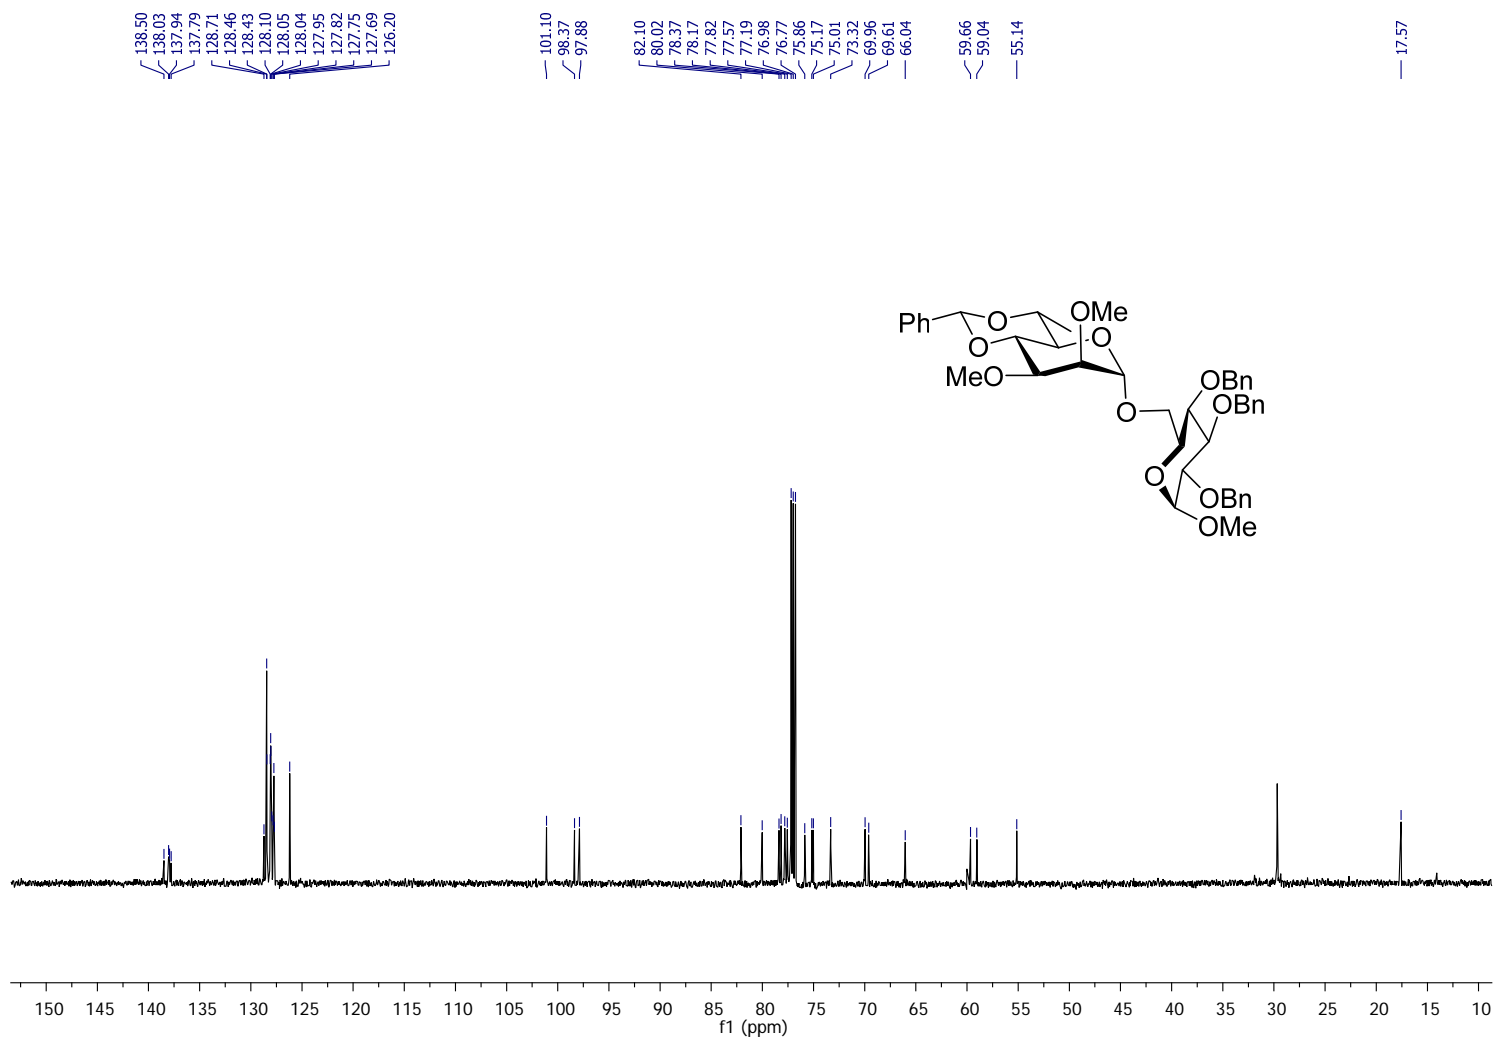

**<sup>1</sup>H NMR (400 MHz, CDCl<sub>3</sub>) of Methyl 4,6-*O*-benzylidene-7-deoxy-2,3-di-*O*-methyl-*D*-glycero- $\beta$ -*D*-mannohetpopyranosyl-(1 $\rightarrow$ 4)-2',3',6'-tri-*O*-benzyl- $\alpha$ -*D*-glucopyranoside (49 $\beta$ )**

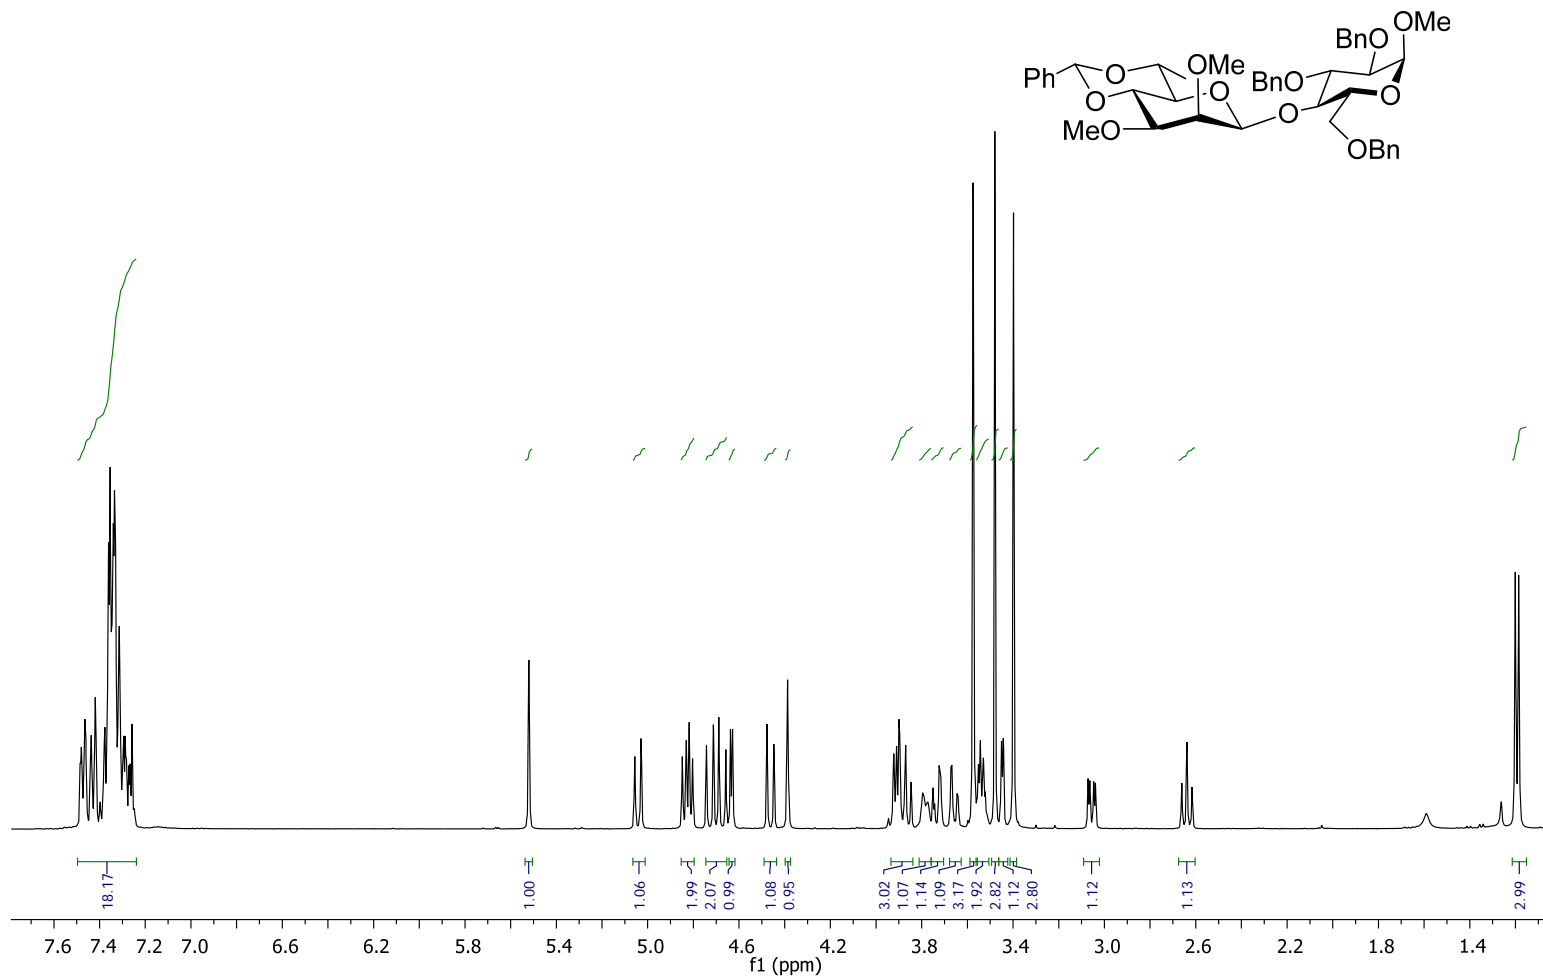



**<sup>1</sup>H NMR (400 MHz, CDCl<sub>3</sub>) of (1-Adamantanyl) 4,6-*O*-benzylidene-7-deoxy-2,3-di-*O*-methyl-D-glycero-β-D-mannohetpopyranoside (50β)**

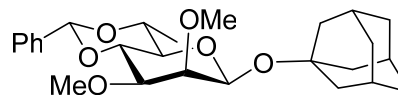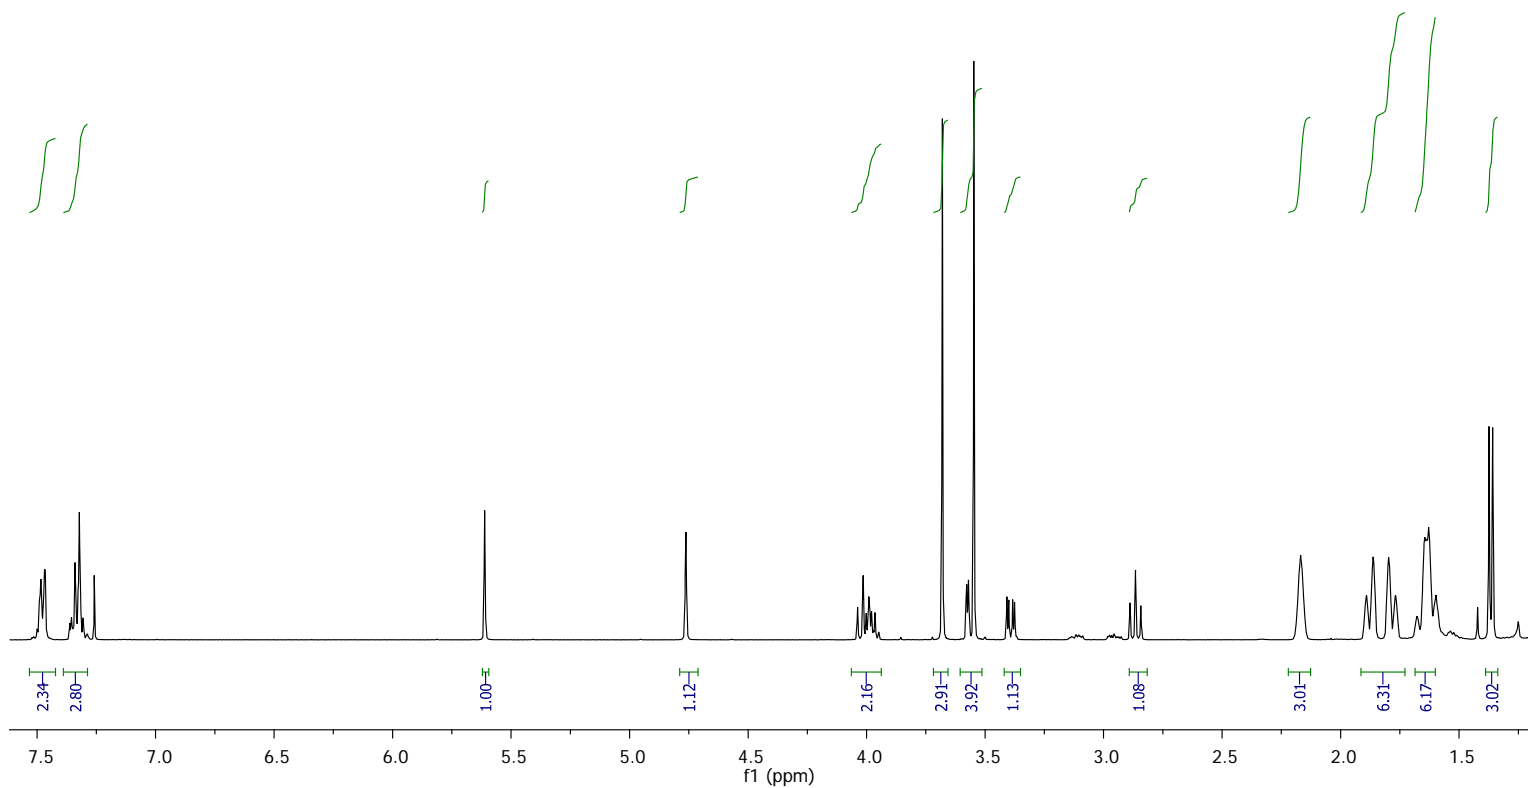

**$^{13}\text{C}$  NMR (100 MHz,  $\text{CDCl}_3$ ) of (1-Adamantanyl) 4,6-*O*-benzylidene-7-deoxy-2,3-di-*O*-methyl-D-glycero- $\beta$ -D-mannohetpopyranoside (50 $\beta$ )**

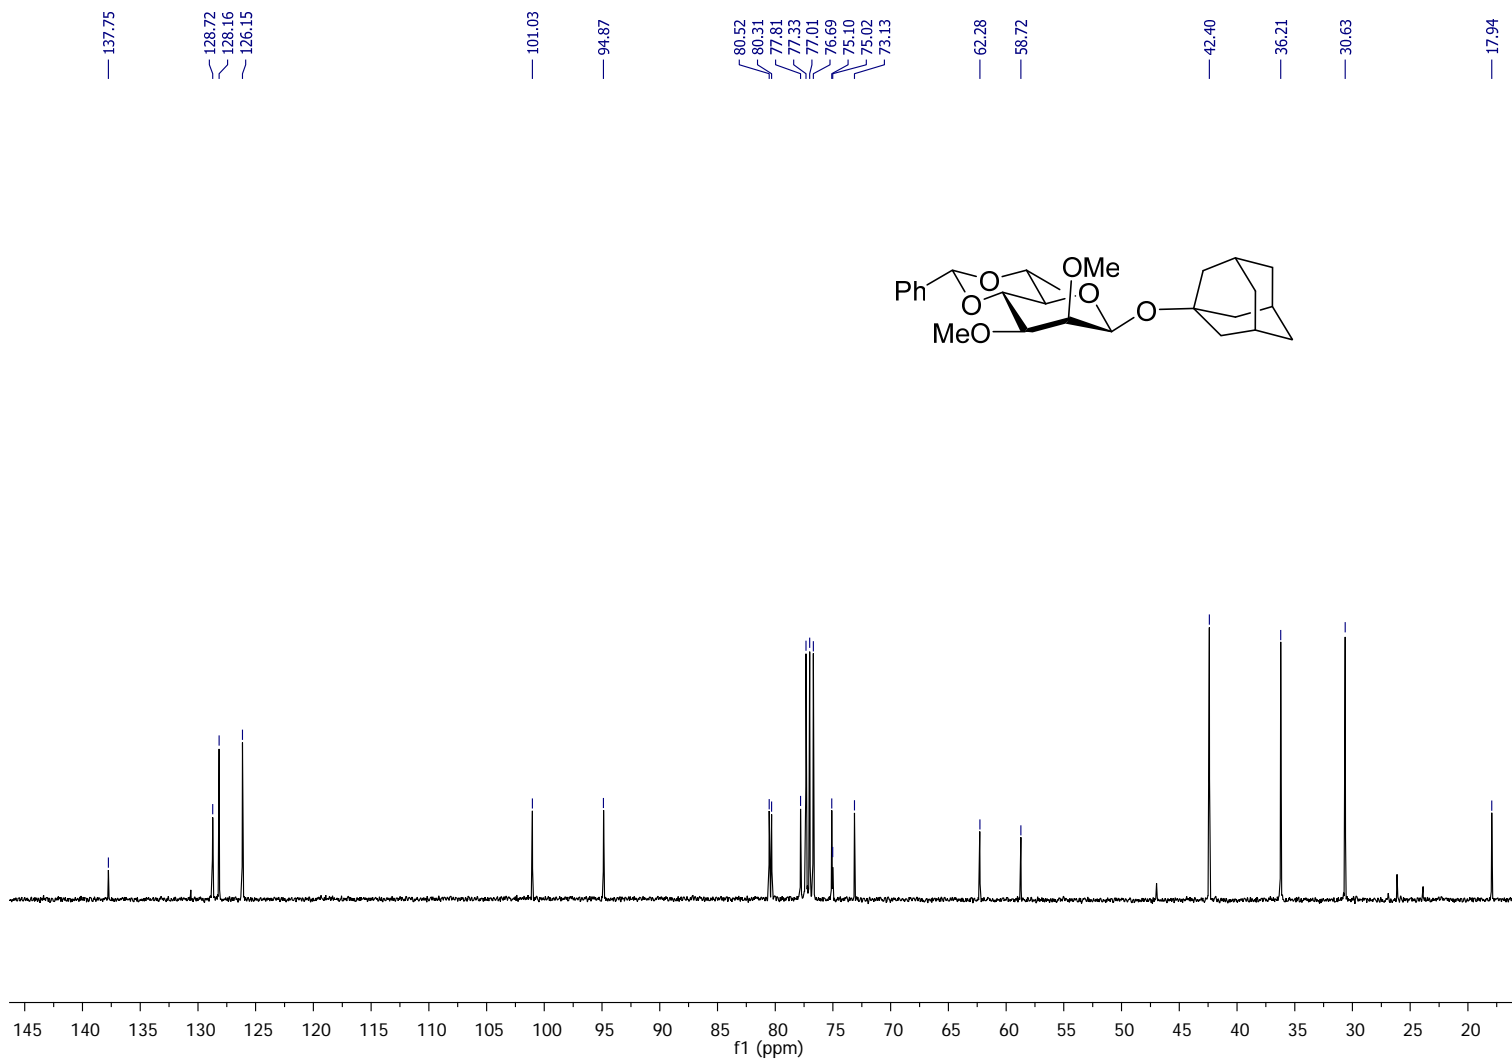

**<sup>1</sup>H NMR (400 MHz, CDCl<sub>3</sub>) of (1-Adamantanyl) 4,6-*O*-benzylidene-7-deoxy-2,3-di-*O*-methyl-D-*glycero*- $\alpha$ -D-*manno*hetpopyranoside (50 $\alpha$ )**

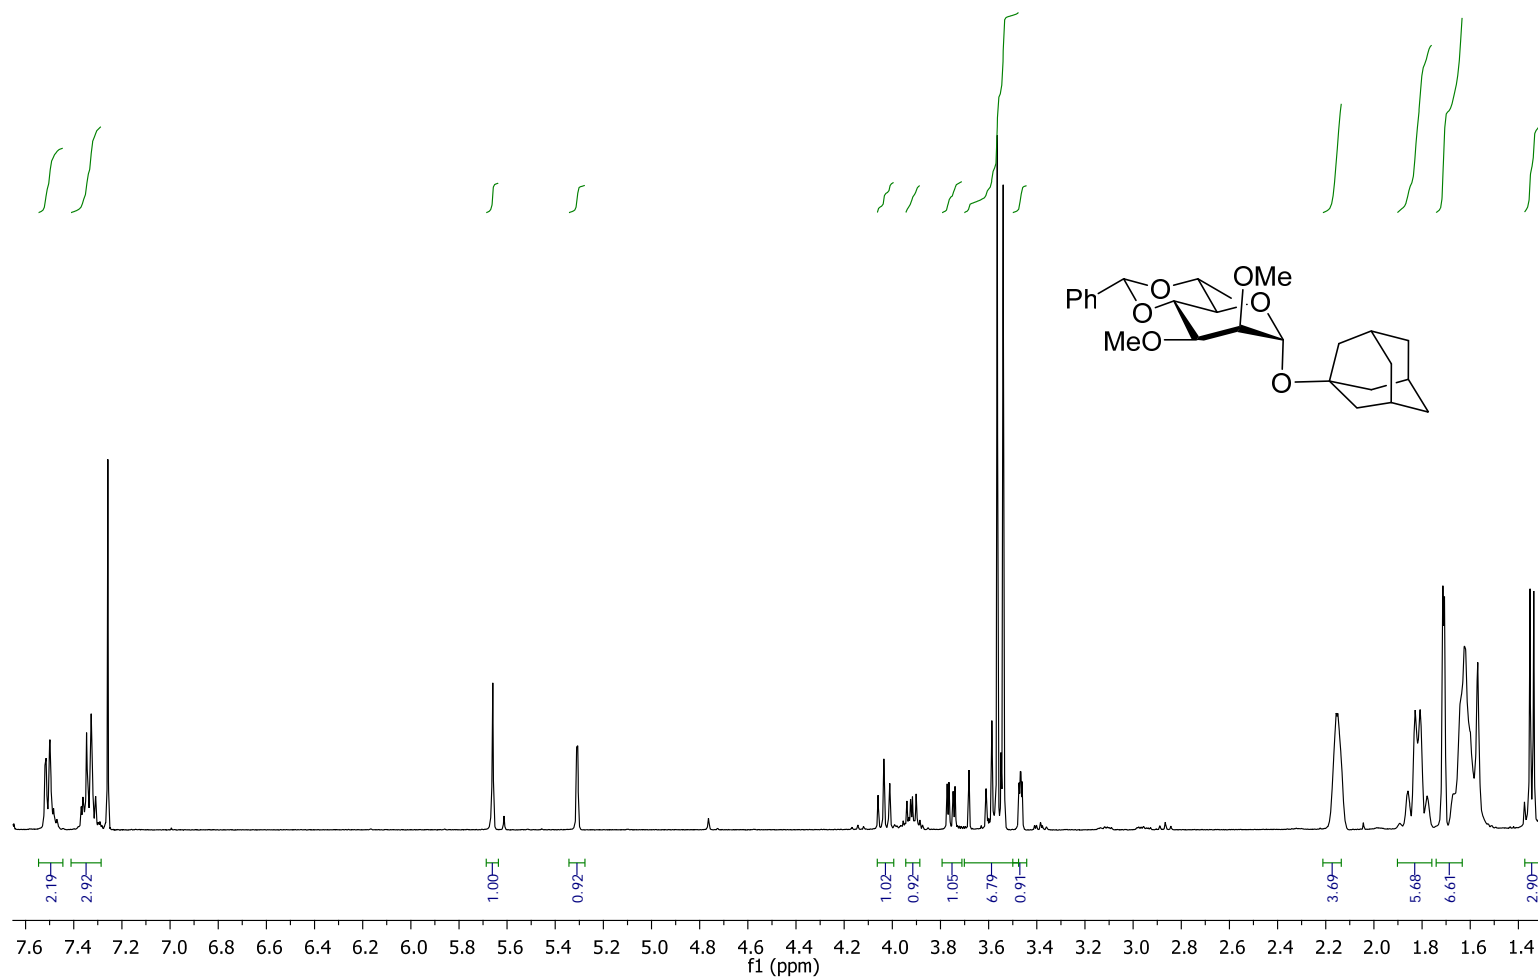

**$^{13}\text{C}$  NMR (100 MHz,  $\text{CDCl}_3$ ) of (1-Adamantanyl) 4,6-*O*-benzylidene-7-deoxy-2,3-di-*O*-methyl-D-glycero- $\alpha$ -D-mannohetpopyranoside (50 $\alpha$ )**

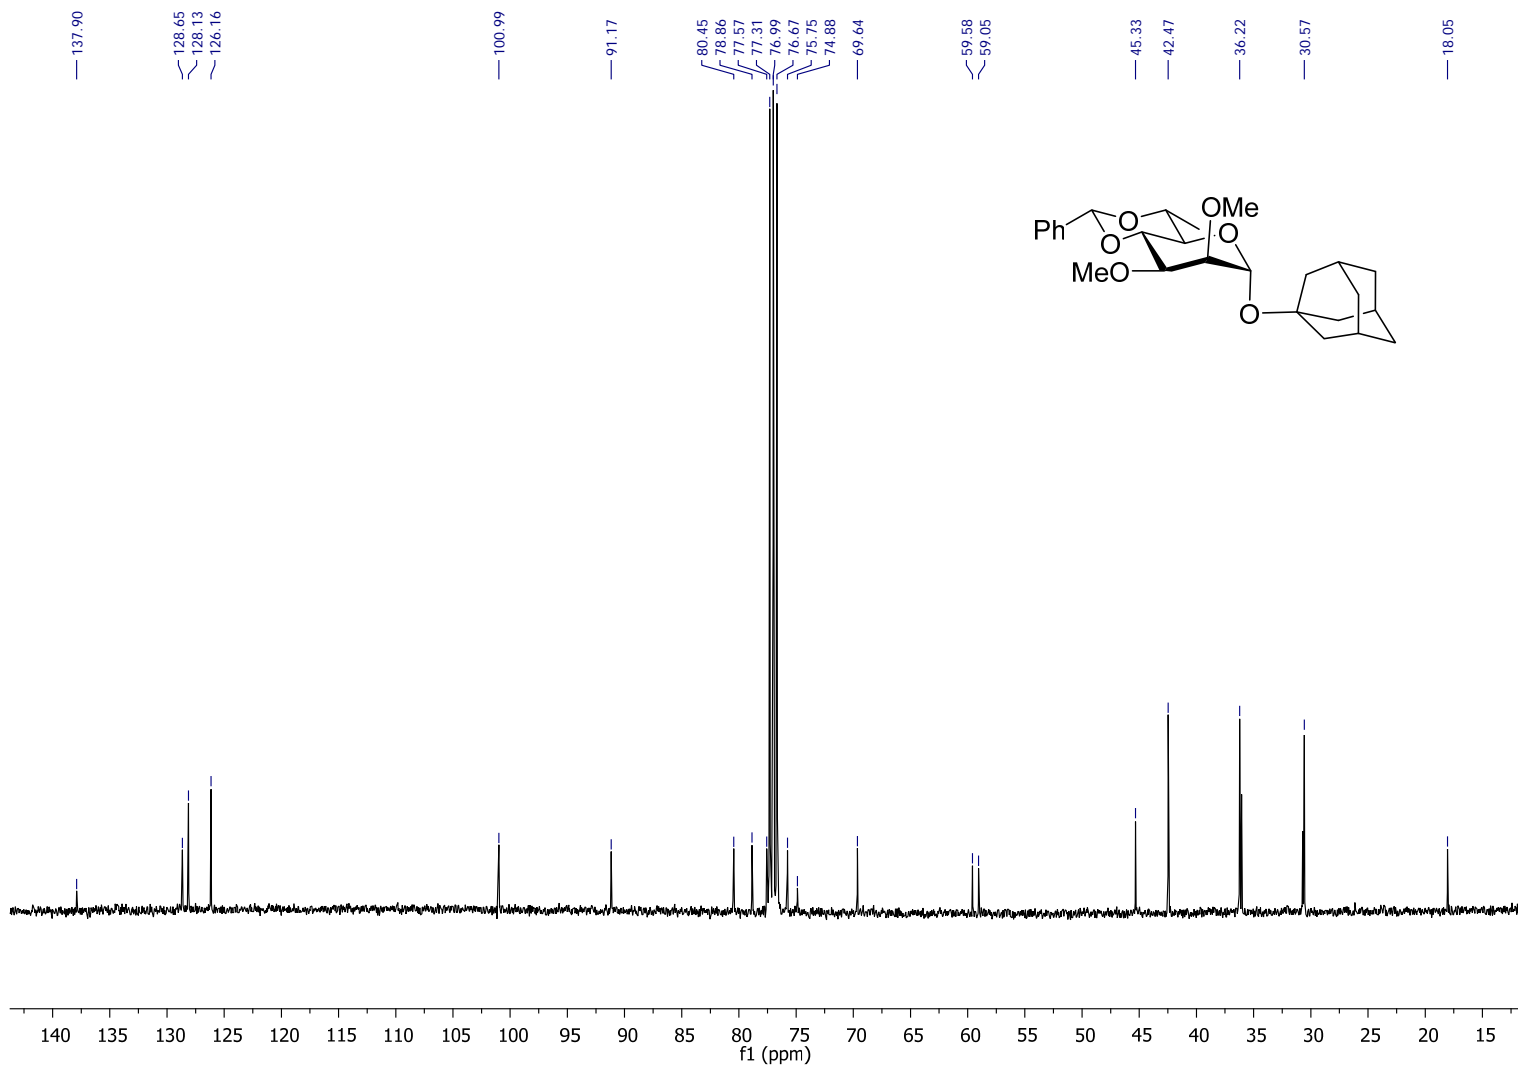

Supplement: NIHMS751875-supplement-supporting_information.pdf [file NIHMS751875-supplement-supporting_information.pdf]
